# Supplementary material for: Genes Responsible for Avoiding Attack of a Beetle, Relating to the Duration of Death Feigning
Source: Research Square preprint supplement (doi:10.21203/rs.3.rs-502324/v1), 2021-05-13
Supplement: Supplementary file 1 [file 814602410cd9f0dd95c1cc13.xlsx]

## Sheet: L
#	Chromosome	Region	Type	Reference	Allele	Zygosity	Count	Coverage	Frequency	Probability	Forward read count	Reverse read count	Forward/reverse balance	Average quality	Read count	Read coverage	# unique start positions	# unique end positions	BaseQRankSum	Read position test probability	Read direction test probability	Hyper-allelic	Genotype	Homopolymer	Homopolymer length	QUAL	Coding region change	Amino acid change	GCF_000002335.3_Tcas5.2_genomic_Gene	GeneID	description (GCF_000002335.3_Tcas5.2_genomic_Gene)	NCBI GENE description	NCBI GENE symbol
1	NC_007416.3	110744	SNV	C	T	Heterozygous	8	20	40	1	7	1	0.12	38.5	8	23	5	7	1	0.18	0.16	no	C/T	No	1	58.98	XP_968029.3:c.[2479C>T]; XP_015838868.1:c.[2506C>T]; XP_008198519.1:c.[2050C>T]; XP_015839410.1:c.[2452C>T]	XP_968029.3:p.[Pro827Ser]; XP_015838868.1:p.[Pro836Ser]; XP_008198519.1:p.[Pro684Ser]; XP_015839410.1:p.[Pro818Ser]	LOC656402	656402		656402 [Gene Symbol: LOC656402] [Locus Tag: TcasGA2_TC004671] [Chromosome: LGX] [Map Location: ] [Description: glycogenin-2] [Gene Type: protein-coding]	LOC656402; TcasGA2_TC004671
2	NC_007416.3	312110	SNV	A	G	Homozygous	26	26	100	1	14	18	0.44	37.69	32	32	15	21		1	1	no	G/G	No	1	98.15	XP_015835038.1:c.2303T>C	XP_015835038.1:p.Phe768Ser	LOC657847	657847		657847 [Gene Symbol: LOC657847] [Locus Tag: TcasGA2_TC034516] [Chromosome: LGX] [Map Location: ] [Description: latrophilin Cirl] [Gene Type: protein-coding]	TcasGA2_TC034516; LOC657847
3	NC_007416.3	495934	SNV	C	T	Homozygous	21	21	100	1	13	8	0.38	38.67	21	21	12	17		1	1	no	T/T	No	1	84.7	XP_969675.1:c.[223G>A]; XP_008200361.1:c.[223G>A]	XP_969675.1:p.[Val75Met]; XP_008200361.1:p.[Val75Met]	LOC658173	658173		658173 [Gene Symbol: LOC658173] [Locus Tag: ] [Chromosome: LGX] [Map Location: ] [Description: alpha-1,6-mannosyl-glycoprotein 2-beta-N-acetylglucosaminyltransferase] [Gene Type: protein-coding]	LOC658173
4	NC_007416.3	870326^870327	Insertion	-	AAACCC	Homozygous	20	20	100	1	14	11	0.44	35.99	25	25	14	17		1	1	no	AAACCC/AAACCC	No	1	200	XP_001812159.2:c.468_469insAAACCC	XP_001812159.2:p.Lys159_Asp160insProLys	LOC100142046	100142046		100142046 [Gene Symbol: LOC100142046] [Locus Tag: TcasGA2_TC004652] [Chromosome: LGX] [Map Location: ] [Description: pollen-specific leucine-rich repeat extensin-like protein 1] [Gene Type: protein-coding]	TcasGA2_TC004652; LOC100142046
5	NC_007416.3	879126	SNV	G	A	Homozygous	26	26	100	1	10	16	0.38	37.81	26	26	17	17		1	1	no	A/A	No	1	99.74	XP_008190742.1:c.[1374G>A]; XP_008190743.1:c.[1374G>A]; XP_008190744.1:c.[1374G>A]	XP_008190742.1:p.[Met458Ile]; XP_008190743.1:p.[Met458Ile]; XP_008190744.1:p.[Met458Ile]	LOC103312277	103312277		103312277 [Gene Symbol: LOC103312277] [Locus Tag: TcasGA2_TC004654] [Chromosome: LGX] [Map Location: ] [Description: uncharacterized LOC103312277] [Gene Type: protein-coding]	TcasGA2_TC004654; P54; LOC103312277
6	NC_007416.3	903965	SNV	A	G	Homozygous	21	21	100	1	13	9	0.41	37.43	22	22	8	16		1	1	no	G/G	No	1	83.1	XP_008190734.1:c.[12T>C]; XP_008190735.1:c.[12T>C]; XP_008190729.1:c.[2T>C]; XP_008190728.1:c.[12T>C]; XP_008190730.1:c.[12T>C]; XP_015834686.1:c.[86+4465T>C]; XP_008190731.1:c.[12T>C]; XP_008190739.1:c.[86+4465T>C]; XP_008190733.1:c.[86+4465T>C]	XP_008190729.1:p.[Met1?]	LOC658988	658988		658988 [Gene Symbol: LOC658988] [Locus Tag: TcasGA2_TC004710] [Chromosome: LGX] [Map Location: ] [Description: aryl hydrocarbon receptor nuclear translocator homolog] [Gene Type: protein-coding]	TcasGA2_TC004710; LOC658988
7	NC_007416.3	913712	SNV	T	C	Homozygous	27	27	100	1	17	10	0.37	36.74	27	27	11	20		1	1	no	C/C	No	1	101.18	XP_015835886.1:c.[4366A>G]; XP_015835879.1:c.[4531A>G]; XP_015835888.1:c.[4351A>G]; XP_015835876.1:c.[4561A>G]; XP_015835885.1:c.[4576A>G]; XP_015835870.1:c.[4576A>G]; XP_015835893.1:c.[4240A>G]; XP_015835895.1:c.[3829A>G]; XP_015835892.1:c.[4270A>G]; XP_015835873.1:c.[4576A>G]; XP_015835881.1:c.[4510A>G]; XP_015835890.1:c.[4300A>G]; XP_015835866.1:c.[4576A>G]; XP_015835883.1:c.[4480A>G]	XP_015835886.1:p.[Ile1456Val]; XP_015835879.1:p.[Ile1511Val]; XP_015835888.1:p.[Ile1451Val]; XP_015835876.1:p.[Ile1521Val]; XP_015835885.1:p.[Ile1526Val]; XP_015835870.1:p.[Ile1526Val]; XP_015835893.1:p.[Ile1414Val]; XP_015835895.1:p.[Ile1277Val]; XP_015835892.1:p.[Ile1424Val]; XP_015835873.1:p.[Ile1526Val]; XP_015835881.1:p.[Ile1504Val]; XP_015835890.1:p.[Ile1434Val]; XP_015835866.1:p.[Ile1526Va…	LOC100141763	100141763		100141763 [Gene Symbol: LOC100141763] [Locus Tag: TcasGA2_TC004706] [Chromosome: LGX] [Map Location: LGX|LGX] [Description: agrin] [Gene Type: protein-coding]	LOC100141763; TcasGA2_TC004706
8	NC_007416.3	1026883	SNV	G	A	Homozygous	20	20	100	1	15	5	0.25	37.95	20	20	10	14		1	1	no	A/A	No	1	81.69	XP_969958.1:c.5G>A	XP_969958.1:p.Arg2Lys	LOC658481	658481		658481 [Gene Symbol: LOC658481] [Locus Tag: TcasGA2_TC004657] [Chromosome: LGX] [Map Location: ] [Description: inactive pancreatic lipase-related protein 1] [Gene Type: protein-coding]	TcasGA2_TC004657; LOC658481
9	NC_007416.3	1026894	SNV	T	C	Homozygous	22	22	100	1	17	5	0.23	37.5	22	22	12	14		1	1	no	C/C	No	1	86.13	XP_969958.1:c.16T>C	XP_969958.1:p.Phe6Leu	LOC658481	658481		658481 [Gene Symbol: LOC658481] [Locus Tag: TcasGA2_TC004657] [Chromosome: LGX] [Map Location: ] [Description: inactive pancreatic lipase-related protein 1] [Gene Type: protein-coding]	TcasGA2_TC004657; LOC658481
10	NC_007416.3	1030420	SNV	C	T	Homozygous	20	20	100	1	11	11	0.5	39.1	22	22	10	15		1	1	no	T/T	No	1	81.69	XP_008190720.1:c.[286G>A]; XP_015835927.1:c.[286G>A]	XP_008190720.1:p.[Val96Ile]; XP_015835927.1:p.[Val96Ile]	LOC103312271	103312271		103312271 [Gene Symbol: LOC103312271] [Locus Tag: TcasGA2_TC004705] [Chromosome: LGX] [Map Location: ] [Description: hypothetical protein] [Gene Type: protein-coding]	LOC103312271; TcasGA2_TC004705
11	NC_007416.3	1244148	SNV	C	T	Homozygous	20	20	100	1	9	16	0.36	36.6	25	25	14	13		1	1	no	T/T	No	1	81.7	XP_001813427.1:c.[1264G>A]; XP_015835145.1:c.[1264G>A]; XP_008200248.1:c.[1264G>A]	XP_001813427.1:p.[Glu422Lys]; XP_015835145.1:p.[Glu422Lys]; XP_008200248.1:p.[Glu422Lys]	LOC100142250	100142250		100142250 [Gene Symbol: LOC100142250] [Locus Tag: TcasGA2_TC001632] [Chromosome: LGX] [Map Location: ] [Description: pro-interleukin-16] [Gene Type: protein-coding]	LOC100142250; TcasGA2_TC001632
12	NC_007416.3	1277016	SNV	G	C	Homozygous	20	20	100	1	13	14	0.48	36.45	27	27	11	12		1	1	no	C/C	No	1	80.11	XP_971720.1:c.535C>G	XP_971720.1:p.Arg179Gly	LOC660392	660392		660392 [Gene Symbol: LOC660392] [Locus Tag: TcasGA2_TC001630] [Chromosome: LGX] [Map Location: ] [Description: very-long-chain 3-oxoacyl-CoA reductase] [Gene Type: protein-coding]	LOC660392; TcasGA2_TC001630
13	NC_007416.3	1317658	SNV	T	G	Homozygous	23	23	100	1	9	18	0.33	36.3	27	27	15	14		1	1	no	G/G	No	1	89.12	XP_008200242.1:c.[152-605T>G]; XP_015835407.1:c.[151A>C]	XP_015835407.1:p.Ile51Leu	LOC659752, LOC103314874	659752 , 103314874		659752 [Gene Symbol: LOC659752] [Locus Tag: TcasGA2_TC001611] [Chromosome: LGX] [Map Location: ] [Description: SEC23-interacting protein] [Gene Type: protein-coding] || 103314874 [Gene Symbol: LOC103314874] [Locus Tag: TcasGA2_TC001625] [Chromosome: LGX] [Map Location: ] [Description: uncharacterized LOC103314874] [Gene Type: protein-coding]	TcasGA2_TC001611; LOC659752 || LOC103314874; TcasGA2_TC001625
14	NC_007416.3	1318677	SNV	T	C	Homozygous	20	20	100	1	16	8	0.33	36.25	24	24	8	16		1	1	no	C/C	No	1	80.11	XP_008200242.1:c.566T>C	XP_008200242.1:p.Leu189Pro	LOC659752	659752		659752 [Gene Symbol: LOC659752] [Locus Tag: TcasGA2_TC001611] [Chromosome: LGX] [Map Location: ] [Description: SEC23-interacting protein] [Gene Type: protein-coding]	TcasGA2_TC001611; LOC659752
15	NC_007416.3	1657211	SNV	T	C	Homozygous	25	25	100	1	15	14	0.48	37	29	29	13	19		1	1	no	C/C	No	1	95.15	XP_008200041.1:c.4717T>C	XP_008200041.1:p.Phe1573Leu	LOC656639	656639		656639 [Gene Symbol: LOC656639] [Locus Tag: TcasGA2_TC004144] [Chromosome: LGX] [Map Location: ] [Description: plexin-B] [Gene Type: protein-coding]	LOC656639; TcasGA2_TC004144; PlexB
16	NC_007416.3	1730301	SNV	C	A	Homozygous	23	23	100	1	15	12	0.44	37.87	27	27	13	17		1	1	no	A/A	No	1	90.72	XP_008200046.1:c.[9568C>A]; XP_008200047.1:c.[9568C>A]; XP_008200049.1:c.[9568C>A]; XP_008200048.1:c.[9568C>A]	XP_008200046.1:p.[Leu3190Ile]; XP_008200047.1:p.[Leu3190Ile]; XP_008200049.1:p.[Leu3190Ile]; XP_008200048.1:p.[Leu3190Ile]	LOC657452	657452		657452 [Gene Symbol: LOC657452] [Locus Tag: TcasGA2_TC004152] [Chromosome: LGX] [Map Location: ] [Description: E3 ubiquitin-protein ligase HUWE1] [Gene Type: protein-coding]	HUWE1; LOC657452; TcasGA2_TC004152
17	NC_007416.3	1739695	SNV	G	A	Homozygous	20	20	100	1	13	7	0.35	37.4	20	20	9	15		1	1	no	A/A	No	1	81.69	XP_969153.1:c.353G>A	XP_969153.1:p.Arg118His	LOC657609	657609		657609 [Gene Symbol: LOC657609] [Locus Tag: TcasGA2_TC004153] [Chromosome: LGX] [Map Location: ] [Description: tyrosine-protein kinase shark] [Gene Type: protein-coding]	TcasGA2_TC004153; LOC657609
18	NC_007416.3	1783949	SNV	C	T	Homozygous	25	25	100	1	12	18	0.4	36.72	30	30	15	19		1	1	no	T/T	No	1	96.74	XP_008200056.1:c.[392C>T]; XP_015833120.1:c.[163+5641G>A]; XP_008200057.1:c.[22+4085G>A]	XP_008200056.1:p.Ala131Val	LOC657688, LOC103314824	657688 , 103314824		657688 [Gene Symbol: LOC657688] [Locus Tag: TcasGA2_TC004118] [Chromosome: LGX] [Map Location: ] [Description: Kv channel-interacting protein 4] [Gene Type: protein-coding] || 103314824 [Gene Symbol: LOC103314824] [Locus Tag: TcasGA2_TC004158] [Chromosome: LGX] [Map Location: ] [Description: hypothetical protein] [Gene Type: protein-coding]	LOC657688; TcasGA2_TC004118 || LOC103314824; TcasGA2_TC004158
19	NC_007416.3	1832098	SNV	C	A	Homozygous	25	25	100	1	12	13	0.48	36.8	25	25	16	16		1	1	no	A/A	No	1	96.73	XP_970018.1:c.427G>T	XP_970018.1:p.Ala143Ser	LOC658543	658543		658543 [Gene Symbol: LOC658543] [Locus Tag: TcasGA2_TC004115] [Chromosome: LGX] [Map Location: ] [Description: glutathione-specific gamma-glutamylcyclotransferase 1] [Gene Type: protein-coding]	LOC658543; TcasGA2_TC004115
20	NC_007416.3	1844507	SNV	C	T	Homozygous	20	20	100	1	20	3	0.13	37.2	23	23	12	15		1	1	no	T/T	No	1	81.69	XP_008200063.1:c.1423G>A	XP_008200063.1:p.Asp475Asn	LOC658619	658619		658619 [Gene Symbol: LOC658619] [Locus Tag: TcasGA2_TC004114] [Chromosome: LGX] [Map Location: ] [Description: neurogenic locus protein delta] [Gene Type: protein-coding]	LOC658619; TcasGA2_TC004114
21	NC_007416.3	2870835	SNV	T	A	Homozygous	22	22	100	1	12	11	0.48	33.95	23	23	11	16		1	1	no	A/A	No	1	87.7	XP_968056.1:c.467T>A	XP_968056.1:p.Ile156Asn	LOC656430	656430		656430 [Gene Symbol: LOC656430] [Locus Tag: TcasGA2_TC014185] [Chromosome: LGX] [Map Location: ] [Description: fork head domain-containing protein FD4] [Gene Type: protein-coding]	LOC656430; TcasGA2_TC014185
22	NC_007416.3	2920501	SNV	C	G	Homozygous	40	40	100	1	30	12	0.29	38.77	42	42	15	22		1	1	no	G/G	No	1	140.3	XP_008193397.1:c.863G>C	XP_008193397.1:p.Gly288Ala	LOC656762	656762		656762 [Gene Symbol: LOC656762] [Locus Tag: TcasGA2_TC013629] [Chromosome: LGX] [Map Location: ] [Description: nuclear pore complex protein Nup98-Nup96] [Gene Type: protein-coding]	TcasGA2_TC013629; LOC656762
23	NC_007416.3	2920537	SNV	A	G	Homozygous	28	28	100	1	13	21	0.38	36.32	34	34	11	14		1	1	no	G/G	No	1	104.17	XP_008193397.1:c.827T>C	XP_008193397.1:p.Val276Ala	LOC656762	656762		656762 [Gene Symbol: LOC656762] [Locus Tag: TcasGA2_TC013629] [Chromosome: LGX] [Map Location: ] [Description: nuclear pore complex protein Nup98-Nup96] [Gene Type: protein-coding]	TcasGA2_TC013629; LOC656762
24	NC_007416.3	2928445	SNV	A	G	Homozygous	22	22	100	1	11	15	0.42	37	26	26	12	14		1	1	no	G/G	No	1	86.11	XP_015834239.1:c.[5947T>C]; XP_015834246.1:c.[5929T>C]; XP_015834242.1:c.[5947T>C]; XP_008193398.1:c.[5722T>C]	XP_015834239.1:p.[Ser1983Pro]; XP_015834246.1:p.[Ser1977Pro]; XP_015834242.1:p.[Ser1983Pro]; XP_008193398.1:p.[Ser1908Pro]	LOC657022	657022		657022 [Gene Symbol: LOC657022] [Locus Tag: TcasGA2_TC013627] [Chromosome: LGX] [Map Location: ] [Description: centromere-associated protein E] [Gene Type: protein-coding]	TcasGA2_TC013627; LOC657022
25	NC_007416.3	2943877	SNV	T	G	Homozygous	21	21	100	1	10	12	0.45	37.71	22	22	10	13		1	1	no	G/G	No	1	83.1	XP_008193404.1:c.[789A>C]; XP_968749.2:c.[792A>C]	XP_008193404.1:p.[Leu263Phe]; XP_968749.2:p.[Leu264Phe]	LOC657185	657185		657185 [Gene Symbol: LOC657185] [Locus Tag: TcasGA2_TC013625] [Chromosome: LGX] [Map Location: ] [Description: ralA-binding protein 1] [Gene Type: protein-coding]	LOC657185; TcasGA2_TC013625
26	NC_007416.3	2972756	SNV	T	C	Homozygous	21	21	100	1	11	13	0.46	38.38	24	24	14	18		1	1	no	C/C	No	1	83.12	XP_008193406.1:c.1264A>G	XP_008193406.1:p.Ser422Gly	LOC657569	657569		657569 [Gene Symbol: LOC657569] [Locus Tag: TcasGA2_TC013622] [Chromosome: LGX] [Map Location: ] [Description: membrane-associated guanylate kinase, WW and PDZ domain-containing protein 1] [Gene Type: protein-coding]	LOC657569; TcasGA2_TC013622
27	NC_007416.3	3040171	SNV	C	T	Homozygous	29	29	100	1	24	5	0.17	36.93	29	29	8	21		1	1	no	T/T	No	1	108.77	XP_008193408.1:c.1295G>A	XP_008193408.1:p.Arg432Gln	LOC658041	658041		658041 [Gene Symbol: LOC658041] [Locus Tag: TcasGA2_TC013617] [Chromosome: LGX] [Map Location: ] [Description: heat shock protein DDB_G0288861] [Gene Type: protein-coding]	LOC658041; TcasGA2_TC013617
28	NC_007416.3	3040280	SNV	C	G	Homozygous	36	37	97.3	1	8	30	0.21	38.22	38	39	13	14		0.99	1	no	G/G	No	1	102.38	XP_008193408.1:c.1186G>C	XP_008193408.1:p.Ala396Pro	LOC658041	658041		658041 [Gene Symbol: LOC658041] [Locus Tag: TcasGA2_TC013617] [Chromosome: LGX] [Map Location: ] [Description: heat shock protein DDB_G0288861] [Gene Type: protein-coding]	LOC658041; TcasGA2_TC013617
29	NC_007416.3	3179954	SNV	A	C	Homozygous	20	20	100	1	11	14	0.44	37	25	25	10	12		1	1	no	C/C	No	1	80.11	XP_008193419.1:c.263T>G	XP_008193419.1:p.Val88Gly	LOC103313033	103313033		103313033 [Gene Symbol: LOC103313033] [Locus Tag: TcasGA2_TC013608] [Chromosome: LGX] [Map Location: ] [Description: hypothetical protein] [Gene Type: protein-coding]	TcasGA2_TC013608; LOC103313033
30	NC_007416.3	3301414	SNV	T	C	Homozygous	26	26	100	1	9	18	0.33	38.15	27	27	12	15		1	1	no	C/C	No	1	98.17	XP_015840937.1:c.[344T>C]; XP_008193439.1:c.[329T>C]; XP_966323.1:c.[329T>C]; XP_975780.1:c.[329T>C]	XP_015840937.1:p.[Ile115Thr]; XP_008193439.1:p.[Ile110Thr]; XP_966323.1:p.[Ile110Thr]; XP_975780.1:p.[Ile110Thr]	LOC659623	659623		659623 [Gene Symbol: LOC659623] [Locus Tag: TcasGA2_TC014213] [Chromosome: LGX] [Map Location: ] [Description: beta-1,3-galactosyltransferase 5] [Gene Type: protein-coding]	TcasGA2_TC014213; LOC659623
31	NC_007416.3	3313378^3313379	Insertion	-	TGC	Homozygous	22	22	100	1	13	13	0.5	36.27	26	26	14	18		1	1	no	TGC/TGC	No	1	200	XP_001813884.2:c.[2504_2505insGCA]; XP_008193440.1:c.[2504_2505insGCA]	XP_001813884.2:p.[Gln835_Asn836insGln]; XP_008193440.1:p.[Gln835_Asn836insGln]	LOC660658	660658		660658 [Gene Symbol: LOC660658] [Locus Tag: TcasGA2_TC013593] [Chromosome: LGX] [Map Location: ] [Description: histone-lysine N-methyltransferase, H3 lysine-79 specific] [Gene Type: protein-coding]	TcasGA2_TC013593; LOC660658
32	NC_007416.3	3424044	SNV	T	A	Homozygous	21	21	100	1	11	10	0.48	36.14	21	21	9	11		1	1	no	A/A	No	1	84.7	XP_015833018.1:c.[179A>T]; XP_015833044.1:c.[179A>T]; XP_015833025.1:c.[179A>T]; XP_015833022.1:c.[179A>T]; XP_015833036.1:c.[179A>T]; XP_015833030.1:c.[179A>T]	XP_015833018.1:p.[Asp60Val]; XP_015833044.1:p.[Asp60Val]; XP_015833025.1:p.[Asp60Val]; XP_015833022.1:p.[Asp60Val]; XP_015833036.1:p.[Asp60Val]; XP_015833030.1:p.[Asp60Val]	LOC100141527	100141527		100141527 [Gene Symbol: LOC100141527] [Locus Tag: TcasGA2_TC013586] [Chromosome: LGX] [Map Location: ] [Description: trithorax group protein osa] [Gene Type: protein-coding]	TcasGA2_TC013586; LOC100141527
33	NC_007416.3	3424108	SNV	T	C	Homozygous	24	24	100	1	20	10	0.33	35.96	30	30	15	18		1	1	no	C/C	No	1	92.14	XP_015833036.1:c.[115A>G]; XP_015833018.1:c.[115A>G]; XP_015833022.1:c.[115A>G]; XP_015833025.1:c.[115A>G]; XP_015833044.1:c.[115A>G]; XP_015833030.1:c.[115A>G]	XP_015833036.1:p.[Arg39Gly]; XP_015833018.1:p.[Arg39Gly]; XP_015833022.1:p.[Arg39Gly]; XP_015833025.1:p.[Arg39Gly]; XP_015833044.1:p.[Arg39Gly]; XP_015833030.1:p.[Arg39Gly]	LOC100141527	100141527		100141527 [Gene Symbol: LOC100141527] [Locus Tag: TcasGA2_TC013586] [Chromosome: LGX] [Map Location: ] [Description: trithorax group protein osa] [Gene Type: protein-coding]	TcasGA2_TC013586; LOC100141527
34	NC_007416.3	3424196	SNV	G	C	Homozygous	20	20	100	1	4	17	0.19	37.15	21	21	11	12		1	1	no	C/C	No	1	80.11	XP_015833022.1:c.[27C>G]; XP_015833018.1:c.[27C>G]; XP_015833036.1:c.[27C>G]; XP_015833025.1:c.[27C>G]; XP_015833030.1:c.[27C>G]; XP_015833044.1:c.[27C>G]	XP_015833022.1:p.[His9Gln]; XP_015833018.1:p.[His9Gln]; XP_015833036.1:p.[His9Gln]; XP_015833025.1:p.[His9Gln]; XP_015833030.1:p.[His9Gln]; XP_015833044.1:p.[His9Gln]	LOC100141527	100141527		100141527 [Gene Symbol: LOC100141527] [Locus Tag: TcasGA2_TC013586] [Chromosome: LGX] [Map Location: ] [Description: trithorax group protein osa] [Gene Type: protein-coding]	TcasGA2_TC013586; LOC100141527
35	NC_007416.3	3428438	SNV	A	T	Homozygous	21	21	100	1	14	9	0.39	37.67	23	23	14	15		1	1	no	T/T	No	1	84.7	XP_001814310.1:c.515A>T	XP_001814310.1:p.Asn172Ile	LOC100142228	100142228		100142228 [Gene Symbol: LOC100142228] [Locus Tag: TcasGA2_TC014218] [Chromosome: LGX] [Map Location: ] [Description: RNA pseudouridylate synthase domain-containing protein 1] [Gene Type: protein-coding]	LOC100142228; TcasGA2_TC014218
36	NC_007416.3	3487470	SNV	G	C	Homozygous	25	25	100	1	14	13	0.48	37.96	27	27	14	18		1	1	no	C/C	No	1	95.16	XP_015833754.1:c.[5486G>C]; XP_008193469.1:c.[5471G>C]; XP_008193471.1:c.[5396G>C]; XP_015833763.1:c.[5465G>C]; XP_008193470.1:c.[5450G>C]	XP_015833754.1:p.[Ser1829Thr]; XP_008193469.1:p.[Ser1824Thr]; XP_008193471.1:p.[Ser1799Thr]; XP_015833763.1:p.[Ser1822Thr]; XP_008193470.1:p.[Ser1817Thr]	LOC661047	661047		661047 [Gene Symbol: LOC661047] [Locus Tag: TcasGA2_TC014226] [Chromosome: LGX] [Map Location: ] [Description: kinesin 3A] [Gene Type: protein-coding]	TcasGA2_TC014226; kinesin-3A; LOC661047
37	NC_007416.3	3492097	SNV	T	C	Homozygous	21	21	100	1	13	12	0.48	37.43	25	25	12	16		1	1	no	C/C	No	1	83.13	XP_008193472.1:c.997A>G	XP_008193472.1:p.Thr333Ala	LOC103313041	103313041		103313041 [Gene Symbol: LOC103313041] [Locus Tag: TcasGA2_TC013580] [Chromosome: LGX] [Map Location: ] [Description: uncharacterized LOC103313041] [Gene Type: protein-coding]	LOC103313041; TcasGA2_TC013580
38	NC_007416.3	3506898	SNV	C	T	Homozygous	21	21	100	1	11	10	0.48	38.86	21	21	11	15		1	1	no	T/T	No	1	84.7	XP_015836098.1:c.[2204G>A]; XP_001814704.1:c.[2264G>A]	XP_015836098.1:p.[Gly735Glu]; XP_001814704.1:p.[Gly755Glu]	LOC100142224	100142224		100142224 [Gene Symbol: LOC100142224] [Locus Tag: TcasGA2_TC013578] [Chromosome: LGX] [Map Location: ] [Description: zinc finger protein Xfin] [Gene Type: protein-coding]	TcasGA2_TC013578; LOC100142224
39	NC_007416.3	3591457	SNV	C	T	Homozygous	20	20	100	1	8	14	0.36	39.45	22	22	14	13		1	1	no	T/T	No	1	81.69	XP_008193502.1:c.677C>T	XP_008193502.1:p.Thr226Ile	LOC662221	662221		662221 [Gene Symbol: LOC662221] [Locus Tag: TcasGA2_TC014242] [Chromosome: LGX] [Map Location: ] [Description: uncharacterized LOC662221] [Gene Type: protein-coding]	TcasGA2_TC014242; LOC662221
40	NC_007416.3	3753452^3753453	Insertion	-	TT	Homozygous	21	25	84	1	9	12	0.43	38.46	21	25	13	15	2.81	0.79	0.99	no	TT/TT	No	1	200	XP_966761.1:c.[233_234insAA]; XP_008199827.1:c.[233_234insAA]	XP_966761.1:p.[Thr79fs]; XP_008199827.1:p.[Thr79fs]	LOC655160	655160		655160 [Gene Symbol: LOC655160] [Locus Tag: ] [Chromosome: LGX] [Map Location: ] [Description: cysteine-rich hydrophobic domain-containing protein 2] [Gene Type: protein-coding]	LOC655160
41	NC_007416.3	3877146	SNV	T	C	Homozygous	25	25	100	1	16	15	0.48	38.56	31	31	15	18		1	1	no	C/C	No	1	95.16	XP_008199830.1:c.[368T>C]; XP_015836742.1:c.[368T>C]; XP_008199829.1:c.[368T>C]	XP_008199830.1:p.[Leu123Ser]; XP_015836742.1:p.[Leu123Ser]; XP_008199829.1:p.[Leu123Ser]	LOC103314770	103314770		103314770 [Gene Symbol: LOC103314770] [Locus Tag: ] [Chromosome: LGX] [Map Location: ] [Description: lymphoid-specific helicase-like] [Gene Type: protein-coding]	LOC103314770
42	NC_007416.3	3881460	SNV	C	G	Homozygous	22	22	100	1	17	5	0.23	35.91	22	22	10	15		1	1	no	G/G	No	1	86.11	XP_008199831.1:c.[318C>G]; XP_015834832.1:c.[159C>G]	XP_008199831.1:p.[Asp106Glu]; XP_015834832.1:p.[Asp53Glu]	LOC103314771	103314771		103314771 [Gene Symbol: LOC103314771] [Locus Tag: ] [Chromosome: LGX] [Map Location: ] [Description: uncharacterized LOC103314771] [Gene Type: protein-coding]	LOC103314771
43	NC_007416.3	3904377	SNV	C	T	Homozygous	20	21	95.24	1	9	11	0.45	37.5	20	21	13	16		0.99	1	no	T/T	No	1	53.05	XP_008199839.1:c.1061G>A	XP_008199839.1:p.Gly354Asp	LOC656636	656636		656636 [Gene Symbol: LOC656636] [Locus Tag: ] [Chromosome: LGX] [Map Location: ] [Description: adenosylhomocysteinase 2-like] [Gene Type: protein-coding]	LOC656636
44	NC_007416.3	3905138	SNV	A	G	Homozygous	24	24	100	1	18	11	0.38	36.29	29	29	13	15		1	1	no	G/G	No	1	92.13	XP_008199839.1:c.446T>C	XP_008199839.1:p.Leu149Ser	LOC656636	656636		656636 [Gene Symbol: LOC656636] [Locus Tag: ] [Chromosome: LGX] [Map Location: ] [Description: adenosylhomocysteinase 2-like] [Gene Type: protein-coding]	LOC656636
45	NC_007416.3	3905271	SNV	G	A	Homozygous	30	30	100	1	12	26	0.32	36.83	38	38	14	17		1	1	no	A/A	No	1	111.77	XP_008199839.1:c.359C>T	XP_008199839.1:p.Ser120Leu	LOC656636	656636		656636 [Gene Symbol: LOC656636] [Locus Tag: ] [Chromosome: LGX] [Map Location: ] [Description: adenosylhomocysteinase 2-like] [Gene Type: protein-coding]	LOC656636
46	NC_007416.3	3905314^3905315	Insertion	-	A	Homozygous	22	22	100	1	9	17	0.35	37.14	26	26	13	14		1	1	no	A/A	No	1	87.71	XP_008199839.1:c.315_316insT	XP_008199839.1:p.Ala106fs	LOC656636	656636		656636 [Gene Symbol: LOC656636] [Locus Tag: ] [Chromosome: LGX] [Map Location: ] [Description: adenosylhomocysteinase 2-like] [Gene Type: protein-coding]	LOC656636
47	NC_007416.3	3907160	SNV	C	G	Homozygous	23	23	100	1	8	18	0.31	36.7	26	26	12	15		1	1	no	G/G	No	1	89.12	XP_008199838.1:c.[267C>G]; XP_015840526.1:c.[267C>G]	XP_008199838.1:p.[Ile89Met]; XP_015840526.1:p.[Ile89Met]	LOC656803	656803		656803 [Gene Symbol: LOC656803] [Locus Tag: ] [Chromosome: LGX] [Map Location: ] [Description: eukaryotic translation initiation factor 2D] [Gene Type: protein-coding]	LOC656803
48	NC_007416.3	3909268	SNV	G	A	Homozygous	25	28	89.29	1	10	20	0.33	38.2	30	33	16	18		0.97	1	no	A/A	No	1	26.05	XP_001808435.1:c.274G>A	XP_001808435.1:p.Val92Ile	LOC656981	656981		656981 [Gene Symbol: LOC656981] [Locus Tag: TcasGA2_TC034215] [Chromosome: LGX] [Map Location: ] [Description: ADP-ribosylation factor 2] [Gene Type: protein-coding]	TcasGA2_TC034215; LOC656981
49	NC_007416.3	4485021	SNV	G	A	Homozygous	25	25	100	1	8	19	0.3	36.32	27	27	15	16		1	1	no	A/A	No	1	96.73	XP_008200559.1:c.[350C>T]; XP_008200560.1:c.[350-3C>T]; XP_015833215.1:c.[7+7681G>A]	XP_008200559.1:p.Thr117Ile	LOC659958, LOC659760	659958 , 659760		659958 [Gene Symbol: LOC659958] [Locus Tag: TcasGA2_TC004719] [Chromosome: LGX] [Map Location: ] [Description: nipped-B-like protein] [Gene Type: protein-coding] || 659760 [Gene Symbol: LOC659760] [Locus Tag: TcasGA2_TC004647] [Chromosome: LGX] [Map Location: ] [Description: cytosolic carboxypeptidase 6] [Gene Type: protein-coding]	TcasGA2_TC004719; LOC659958 || TcasGA2_TC004647; LOC659760
50	NC_007416.3	4628456	SNV	A	G	Homozygous	21	21	100	1	10	11	0.48	37.14	21	21	13	16		1	1	no	G/G	No	1	83.1	XP_972507.2:c.697A>G	XP_972507.2:p.Thr233Ala	LOC661239	661239		661239 [Gene Symbol: LOC661239] [Locus Tag: TcasGA2_TC005168] [Chromosome: LGX] [Map Location: ] [Description: putative GTP-binding protein 6] [Gene Type: protein-coding]	LOC661239; TcasGA2_TC005168
51	NC_007416.3	4641426	SNV	T	C	Homozygous	23	23	100	1	16	11	0.41	37.74	27	27	14	16		1	1	no	C/C	No	1	86.13	XP_001810773.1:c.[568A>G]; XP_015833597.1:c.[343A>G]	XP_001810773.1:p.[Thr190Ala]; XP_015833597.1:p.[Thr115Ala]	LOC661025, LOC100142196	661025 , 100142196		661025 [Gene Symbol: LOC661025] [Locus Tag: TcasGA2_TC005170] [Chromosome: LGX] [Map Location: ] [Description: nuclear protein MDM1] [Gene Type: protein-coding] || 100142196 [Gene Symbol: LOC100142196] [Locus Tag: TcasGA2_TC031524] [Chromosome: LGX] [Map Location: ] [Description: delta(24)-sterol reductase-like] [Gene Type: protein-coding]	TcasGA2_TC005170; LOC661025 || TcasGA2_TC031524; LOC100142196
52	NC_007416.3	4641739	SNV	T	A	Homozygous	21	21	100	1	9	13	0.41	39.48	22	22	14	16		1	1	no	A/A	No	1	84.7	XP_001810773.1:c.[303A>T]; XP_015833597.1:c.[78A>T]	XP_001810773.1:p.[Glu101Asp]; XP_015833597.1:p.[Glu26Asp]	LOC661025, LOC100142196	661025 , 100142196		661025 [Gene Symbol: LOC661025] [Locus Tag: TcasGA2_TC005170] [Chromosome: LGX] [Map Location: ] [Description: nuclear protein MDM1] [Gene Type: protein-coding] || 100142196 [Gene Symbol: LOC100142196] [Locus Tag: TcasGA2_TC031524] [Chromosome: LGX] [Map Location: ] [Description: delta(24)-sterol reductase-like] [Gene Type: protein-coding]	TcasGA2_TC005170; LOC661025 || TcasGA2_TC031524; LOC100142196
53	NC_007416.3	4939841	SNV	A	T	Homozygous	22	23	95.65	1	6	19	0.24	36.45	25	26	13	12		1	1	no	T/T	No	1	61.6	XP_966867.1:c.807A>T	XP_966867.1:p.Glu269Asp	LOC660971	660971		660971 [Gene Symbol: LOC660971] [Locus Tag: TcasGA2_TC031545] [Chromosome: LGX] [Map Location: ] [Description: EH domain-containing protein 3-like] [Gene Type: protein-coding]	LOC660971; TcasGA2_TC031545
54	NC_007416.3	4939848	SNV	A	G	Homozygous	21	21	100	1	5	18	0.22	36.19	23	23	14	13		1	1	no	G/G	No	1	83.1	XP_966867.1:c.814A>G	XP_966867.1:p.Lys272Glu	LOC660971	660971		660971 [Gene Symbol: LOC660971] [Locus Tag: TcasGA2_TC031545] [Chromosome: LGX] [Map Location: ] [Description: EH domain-containing protein 3-like] [Gene Type: protein-coding]	LOC660971; TcasGA2_TC031545
55	NC_007416.3	4971107	SNV	T	G	Homozygous	21	21	100	1	8	16	0.33	38.57	24	24	13	16		1	1	no	G/G	No	1	83.1	XP_973837.1:c.77A>C	XP_973837.1:p.Tyr26Ser	LOC662660	662660		662660 [Gene Symbol: LOC662660] [Locus Tag: TcasGA2_TC010884] [Chromosome: LGX] [Map Location: ] [Description: BCL2/adenovirus E1B 19 kDa protein-interacting protein 3] [Gene Type: protein-coding]	TcasGA2_TC010884; LOC662660
56	NC_007416.3	5191058	SNV	C	A	Heterozygous	5	20	25	0.98	5	0	0	39.6	5	21	1	2	1.83	0.01	0.03	no	A/C	No	1	17.17	XP_015835466.1:c.[1423G>T]; XP_972902.1:c.[1324G>T]	XP_015835466.1:p.[Ala475Ser]; XP_972902.1:p.[Ala442Ser]	LOC661660	661660		661660 [Gene Symbol: LOC661660] [Locus Tag: TcasGA2_TC010866] [Chromosome: LGX] [Map Location: ] [Description: GTP-binding protein 2] [Gene Type: protein-coding]	TcasGA2_TC010866; LOC661660
57	NC_007416.3	5545324	SNV	G	A	Homozygous	20	20	100	1	10	10	0.5	40.15	20	20	13	13		1	1	no	A/A	No	1	81.69	XP_971882.1:c.680G>A	XP_971882.1:p.Arg227Lys	LOC660567	660567		660567 [Gene Symbol: LOC660567] [Locus Tag: TcasGA2_TC010791] [Chromosome: LGX] [Map Location: ] [Description: deoxynucleoside kinase] [Gene Type: protein-coding]	TcasGA2_TC010791; LOC660567
58	NC_007416.3	5841812	SNV	C	G	Homozygous	21	21	100	1	12	16	0.43	38.43	28	28	13	14		1	1	no	G/G	No	1	83.1	XP_015839288.1:c.157C>G	XP_015839288.1:p.Gln53Glu	LOC659419	659419		659419 [Gene Symbol: LOC659419] [Locus Tag: TcasGA2_TC010801] [Chromosome: LGX] [Map Location: ] [Description: dynein heavy chain 7, axonemal] [Gene Type: protein-coding]	LOC659419; TcasGA2_TC010801
59	NC_007416.3	5862849..5862850	MNV	TG	CA	Heterozygous	7	20	35	1	6	1	0.14	39.86	7	21	3	4		0.1	0.93	no	complex	No	1	200	XP_970551.1:c.[1571_1572delCAinsTG]; XP_015836824.1:c.[1571_1572delCAinsTG]	XP_970551.1:p.[Ala524Val]; XP_015836824.1:p.[Ala524Val]	LOC659126	659126		659126 [Gene Symbol: LOC659126] [Locus Tag: TcasGA2_TC010840] [Chromosome: LGX] [Map Location: ] [Description: nuclear polyadenylated RNA-binding protein 3] [Gene Type: protein-coding]	LOC659126; TcasGA2_TC010840
60	NC_007416.3	5862850	SNV	G	A	Heterozygous	13	20	65	1	10	4	0.29	35.38	14	21	11	12		0.54	0.99	no	complex	No	1	200	XP_015836824.1:c.[1571C>T]; XP_970551.1:c.[1571C>T]	XP_015836824.1:p.[Ala524Val]; XP_970551.1:p.[Ala524Val]	LOC659126	659126		659126 [Gene Symbol: LOC659126] [Locus Tag: TcasGA2_TC010840] [Chromosome: LGX] [Map Location: ] [Description: nuclear polyadenylated RNA-binding protein 3] [Gene Type: protein-coding]	LOC659126; TcasGA2_TC010840
61	NC_007416.3	5895980	SNV	A	C	Heterozygous	13	20	65	1	7	8	0.47	37.46	15	22	7	7	-0.32	0.88	1	no	A/C	No	1	42.62	XP_008199374.2:c.[2516A>C]; XP_015834081.1:c.[2411A>C]; XP_008199373.2:c.[2183A>C]; XP_015834064.1:c.[2516A>C]; XP_015834073.1:c.[2504A>C]	XP_008199374.2:p.[Glu839Ala]; XP_015834081.1:p.[Glu804Ala]; XP_008199373.2:p.[Glu728Ala]; XP_015834064.1:p.[Glu839Ala]; XP_015834073.1:p.[Glu835Ala]	LOC103314649	103314649		103314649 [Gene Symbol: LOC103314649] [Locus Tag: TcasGA2_TC031532] [Chromosome: LGX] [Map Location: ] [Description: uncharacterized LOC103314649] [Gene Type: protein-coding]	TcasGA2_TC031532; LOC103314649
62	NC_007416.3	5994460	SNV	C	T	Heterozygous	6	21	28.57	1	4	2	0.33	38.67	6	22	4	4	0.62	0.31	0.98	no	C/T	No	1	30.67	XP_008199367.1:c.[328G>A]; XP_008199366.1:c.[328G>A]	XP_008199367.1:p.[Ala110Thr]; XP_008199366.1:p.[Ala110Thr]	LOC658614	658614		658614 [Gene Symbol: LOC658614] [Locus Tag: TcasGA2_TC010838] [Chromosome: LGX] [Map Location: ] [Description: ubiquitin carboxyl-terminal hydrolase 8] [Gene Type: protein-coding]	LOC658614; TcasGA2_TC010838
63	NC_007416.3	6007048	SNV	G	C	Heterozygous	16	22	72.73	0.98	14	2	0.12	37.56	16	22	9	13	-0.37	0.94	0.98	no	C/G	No	1	16.66	XP_969735.1:c.734G>C	XP_969735.1:p.Gly245Ala	LOC658236	658236		658236 [Gene Symbol: LOC658236] [Locus Tag: TcasGA2_TC010817] [Chromosome: LGX] [Map Location: ] [Description: uncharacterized LOC658236] [Gene Type: protein-coding]	LOC658236; TcasGA2_TC010817
64	NC_007416.3	6007423	SNV	C	T	Homozygous	17	20	85	0.7	5	14	0.26	38.53	19	22	9	9		0.96	1	no	T/T	No	1	5.28	XP_969735.1:c.1109C>T	XP_969735.1:p.Thr370Met	LOC658236	658236		658236 [Gene Symbol: LOC658236] [Locus Tag: TcasGA2_TC010817] [Chromosome: LGX] [Map Location: ] [Description: uncharacterized LOC658236] [Gene Type: protein-coding]	LOC658236; TcasGA2_TC010817
65	NC_007416.3	6007445	SNV	G	C	Homozygous	23	23	100	1	2	22	0.08	39.04	24	24	10	11		1	1	no	C/C	No	1	89.14	XP_969735.1:c.1131G>C	XP_969735.1:p.Glu377Asp	LOC658236	658236		658236 [Gene Symbol: LOC658236] [Locus Tag: TcasGA2_TC010817] [Chromosome: LGX] [Map Location: ] [Description: uncharacterized LOC658236] [Gene Type: protein-coding]	LOC658236; TcasGA2_TC010817
66	NC_007416.3	6297070	SNV	A	G	Homozygous	22	22	100	1	13	13	0.5	38.41	26	26	14	15		1	1	no	G/G	No	1	86.11	XP_967484.2:c.246A>G	XP_967484.2:p.Ile82Met	LOC655828	655828		655828 [Gene Symbol: LOC655828] [Locus Tag: TcasGA2_TC004742] [Chromosome: LGX] [Map Location: ] [Description: uncharacterized LOC655828] [Gene Type: protein-coding]	LOC655828; TcasGA2_TC004742
67	NC_007416.3	6375294..6375295	MNV	AC	GT	Heterozygous	11	28	39.29	1	8	3	0.27	36.85	11	30	6	8	-1.66	0.6	1	no	complex	No	1	200	XP_968183.1:c.1726_1727delACinsGT	XP_968183.1:p.Thr576Val	LOC656569	656569		656569 [Gene Symbol: LOC656569] [Locus Tag: TcasGA2_TC004751] [Chromosome: LGX] [Map Location: ] [Description: kinesin-like protein KIF11-B] [Gene Type: protein-coding]	TcasGA2_TC004751; LOC656569
68	NC_007416.3	6388527	SNV	C	T	Heterozygous	6	22	27.27	0.98	5	2	0.29	36.83	7	24	5	6	-0.92	0.22	0.62	no	C/T	No	1	18.06	XP_968416.2:c.38G>A	XP_968416.2:p.Cys13Tyr	LOC656822	656822		656822 [Gene Symbol: LOC656822] [Locus Tag: TcasGA2_TC004622] [Chromosome: LGX] [Map Location: ] [Description: serine protease H51] [Gene Type: protein-coding]	H51; LOC656822; TcasGA2_TC004622
69	NC_007416.3	6535462^6535463	Insertion	-	T	Homozygous	25	25	100	1	14	11	0.44	36.24	25	25	16	17		1	1	no	T/T	No	1	96.74	XP_015834338.1:c.3069_3070insT	XP_015834338.1:p.Ser1024fs	LOC657159	657159		657159 [Gene Symbol: LOC657159] [Locus Tag: TcasGA2_TC004756] [Chromosome: LGX] [Map Location: ] [Description: neurofibromin] [Gene Type: protein-coding]	LOC657159; TcasGA2_TC004756
70	NC_007416.3	6535545	SNV	T	A	Homozygous	26	26	100	1	11	16	0.41	36.62	27	27	16	17		1	1	no	A/A	No	1	99.74	XP_015834338.1:c.3152T>A	XP_015834338.1:p.Leu1051*	LOC657159	657159		657159 [Gene Symbol: LOC657159] [Locus Tag: TcasGA2_TC004756] [Chromosome: LGX] [Map Location: ] [Description: neurofibromin] [Gene Type: protein-coding]	LOC657159; TcasGA2_TC004756
71	NC_007416.3	6535686	SNV	G	T	Heterozygous	8	21	38.1	1	5	4	0.44	37.62	9	24	4	6	-0.27	0.9	1	no	G/T	No	1	53.91	XP_015834338.1:c.3293G>T	XP_015834338.1:p.Arg1098Leu	LOC657159	657159		657159 [Gene Symbol: LOC657159] [Locus Tag: TcasGA2_TC004756] [Chromosome: LGX] [Map Location: ] [Description: neurofibromin] [Gene Type: protein-coding]	LOC657159; TcasGA2_TC004756
72	NC_007416.3	7398998	SNV	C	G	Homozygous	21	21	100	1	5	19	0.21	35.43	24	24	10	11		1	1	no	G/G	No	1	83.1	XP_008200761.1:c.[476C>G]; XP_015840859.1:c.[476C>G]	XP_008200761.1:p.[Thr159Ser]; XP_015840859.1:p.[Thr159Ser]	LOC661242	661242		661242 [Gene Symbol: LOC661242] [Locus Tag: TcasGA2_TC004799] [Chromosome: LGX] [Map Location: ] [Description: dnaJ protein homolog 1] [Gene Type: protein-coding]	TcasGA2_TC004799; LOC661242
73	NC_007416.3	7404889..7404890	MNV	GT	AG	Homozygous	20	20	100	1	16	4	0.2	38.4	20	20	11	15		1	1	no	AG/AG	No	1	200	XP_015840803.1:c.[434_435delACinsCT]; XP_008200769.1:c.[434_435delACinsCT]; XP_015840796.1:c.[518_519delACinsCT]; XP_015840811.1:c.[320_321delACinsCT]; XP_015840810.1:c.[434_435delACinsCT]	XP_015840803.1:p.[Asp145Ala]; XP_008200769.1:p.[Asp145Ala]; XP_015840796.1:p.[Asp173Ala]; XP_015840811.1:p.[Asp107Ala]; XP_015840810.1:p.[Asp145Ala]	LOC661785	661785		661785 [Gene Symbol: LOC661785] [Locus Tag: TcasGA2_TC004579] [Chromosome: LGX] [Map Location: ] [Description: peroxidase] [Gene Type: protein-coding]	LOC661785; TcasGA2_TC004579
74	NC_007416.3	7405013	SNV	C	G	Homozygous	29	29	100	1	10	19	0.34	38.59	29	29	15	23		1	1	no	G/G	No	1	107.17	XP_015840796.1:c.[395G>C]; XP_015840803.1:c.[311G>C]; XP_015840811.1:c.[197G>C]; XP_015840810.1:c.[311G>C]; XP_008200769.1:c.[311G>C]	XP_015840796.1:p.[Ser132Thr]; XP_015840803.1:p.[Ser104Thr]; XP_015840811.1:p.[Ser66Thr]; XP_015840810.1:p.[Ser104Thr]; XP_008200769.1:p.[Ser104Thr]	LOC661785	661785		661785 [Gene Symbol: LOC661785] [Locus Tag: TcasGA2_TC004579] [Chromosome: LGX] [Map Location: ] [Description: peroxidase] [Gene Type: protein-coding]	LOC661785; TcasGA2_TC004579
75	NC_007416.3	7405139	SNV	C	T	Homozygous	25	25	100	1	5	21	0.19	38.56	26	26	10	12		1	1	no	T/T	No	1	96.74	XP_015840811.1:c.[71G>A]; XP_015840803.1:c.[185G>A]; XP_015840810.1:c.[185G>A]; XP_008200769.1:c.[185G>A]; XP_015840796.1:c.[269G>A]	XP_015840811.1:p.[Arg24Lys]; XP_015840803.1:p.[Arg62Lys]; XP_015840810.1:p.[Arg62Lys]; XP_008200769.1:p.[Arg62Lys]; XP_015840796.1:p.[Arg90Lys]	LOC661785	661785		661785 [Gene Symbol: LOC661785] [Locus Tag: TcasGA2_TC004579] [Chromosome: LGX] [Map Location: ] [Description: peroxidase] [Gene Type: protein-coding]	LOC661785; TcasGA2_TC004579
76	NC_007416.3	7592673^7592674	Insertion	-	CT	Heterozygous	7	20	35	1	5	2	0.29	36.64	7	25	5	7	0.31	0.69	0.87	no	complex	No	1	200	XP_015840777.1:c.[391+79935_391+79936insCT]; XP_015840873.1:c.[69_70insCT]; XP_015840780.1:c.[199+79935_199+79936insCT]	XP_015840873.1:p.Ser25fs	LOC660322, LOC107399269	660322 , 107399269		660322 [Gene Symbol: LOC660322] [Locus Tag: TcasGA2_TC001692] [Chromosome: LGX] [Map Location: ] [Description: zinc finger protein basonuclin-2] [Gene Type: protein-coding] || 107399269 [Gene Symbol: LOC107399269] [Locus Tag: TcasGA2_TC031582] [Chromosome: LGX] [Map Location: ] [Description: uncharacterized LOC107399269] [Gene Type: protein-coding]	disco-r; TcasGA2_TC001692; LOC660322 || LOC107399269; TcasGA2_TC031582
77	NC_007416.3	7923356	SNV	C	T	Homozygous	22	22	100	1	11	12	0.48	35.27	23	23	11	14		1	1	no	T/T	No	1	87.71	XP_008199058.1:c.1012G>A	XP_008199058.1:p.Ala338Thr	LOC658611	658611		658611 [Gene Symbol: LOC658611] [Locus Tag: TcasGA2_TC001759] [Chromosome: LGX] [Map Location: ] [Description: rho guanine nucleotide exchange factor 17] [Gene Type: protein-coding]	TcasGA2_TC001759; LOC658611
78	NC_007416.3	8670757	SNV	C	T	Heterozygous	8	33	24.24	0.99	8	1	0.11	40.25	9	35	5	6	1.37	0.24	0.06	no	C/T	No	1	22.77	XP_008199008.1:c.[196C>T]; XP_008199007.1:c.[253C>T]; XP_015836611.1:c.[196C>T]	XP_008199008.1:p.[His66Tyr]; XP_008199007.1:p.[His85Tyr]; XP_015836611.1:p.[His66Tyr]	LOC103314509	103314509		103314509 [Gene Symbol: LOC103314509] [Locus Tag: ] [Chromosome: LGX] [Map Location: ] [Description: uncharacterized LOC103314509] [Gene Type: protein-coding]	LOC103314509
79	NC_007416.3	8671088	SNV	C	A	Heterozygous	23	35	65.71	1	17	7	0.29	37.57	24	36	16	17	0.14	0.97	0.99	no	A/C	No	1	69.08	XP_008199007.1:c.[584C>A]; XP_008199008.1:c.[527C>A]; XP_015836611.1:c.[527C>A]	XP_008199007.1:p.[Ala195Glu]; XP_008199008.1:p.[Ala176Glu]; XP_015836611.1:p.[Ala176Glu]	LOC103314509	103314509		103314509 [Gene Symbol: LOC103314509] [Locus Tag: ] [Chromosome: LGX] [Map Location: ] [Description: uncharacterized LOC103314509] [Gene Type: protein-coding]	LOC103314509
80	NC_007416.3	8671200	SNV	A	T	Heterozygous	13	44	29.55	1	10	4	0.29	39	14	47	7	7	-0.28	0.68	0.66	no	A/T	No	1	55.98	XP_015836611.1:c.[639A>T]; XP_008199007.1:c.[696A>T]; XP_008199008.1:c.[639A>T]	XP_015836611.1:p.[Lys213Asn]; XP_008199007.1:p.[Lys232Asn]; XP_008199008.1:p.[Lys213Asn]	LOC103314509	103314509		103314509 [Gene Symbol: LOC103314509] [Locus Tag: ] [Chromosome: LGX] [Map Location: ] [Description: uncharacterized LOC103314509] [Gene Type: protein-coding]	LOC103314509
81	NC_007416.3	8671411	SNV	G	A	Heterozygous	21	45	46.67	1	11	15	0.42	39.38	26	58	11	12	2.8	0.27	1	no	A/G	No	1	153.53	XP_008199007.1:c.[907G>A]; XP_015836611.1:c.[850G>A]; XP_008199008.1:c.[850G>A]	XP_008199007.1:p.[Ala303Thr]; XP_015836611.1:p.[Ala284Thr]; XP_008199008.1:p.[Ala284Thr]	LOC103314509	103314509		103314509 [Gene Symbol: LOC103314509] [Locus Tag: ] [Chromosome: LGX] [Map Location: ] [Description: uncharacterized LOC103314509] [Gene Type: protein-coding]	LOC103314509
82	NC_007416.3	8671552	SNV	A	G	Homozygous	29	32	90.62	1	14	18	0.44	38.97	32	35	19	19		1	1	no	G/G	No	1	38.26	XP_008199008.1:c.[991A>G]; XP_008199007.1:c.[1048A>G]; XP_015836611.1:c.[991A>G]	XP_008199008.1:p.[Lys331Glu]; XP_008199007.1:p.[Lys350Glu]; XP_015836611.1:p.[Lys331Glu]	LOC103314509	103314509		103314509 [Gene Symbol: LOC103314509] [Locus Tag: ] [Chromosome: LGX] [Map Location: ] [Description: uncharacterized LOC103314509] [Gene Type: protein-coding]	LOC103314509
83	NC_007417.3	501203	SNV	A	G	Homozygous	22	22	100	1	13	13	0.5	38.5	26	26	11	13		1	1	no	G/G	No	1	86.11	XP_015837142.1:c.184A>G	XP_015837142.1:p.Thr62Ala	LOC107398244	107398244		107398244 [Gene Symbol: LOC107398244] [Locus Tag: TcasGA2_TC030400] [Chromosome: LG2] [Map Location: ] [Description: uncharacterized LOC107398244] [Gene Type: protein-coding]	TcasGA2_TC030400; LOC107398244; Or263
84	NC_007417.3	1910778	SNV	G	A	Heterozygous	21	30	70	1	12	12	0.5	38.33	24	34	14	15	0.59	0.96	1	no	A/G	No	1	44.98	XP_015837412.1:c.404C>T	XP_015837412.1:p.Ser135Phe	LOC658166, LOC107398294	658166 , 107398294		658166 [Gene Symbol: LOC658166] [Locus Tag: TcasGA2_TC005236] [Chromosome: LG2] [Map Location: ] [Description: thrombospondin type-1 domain-containing protein 1] [Gene Type: protein-coding] || 107398294 [Gene Symbol: LOC107398294] [Locus Tag: TcasGA2_TC032004] [Chromosome: LG2] [Map Location: ] [Description: uncharacterized LOC107398294] [Gene Type: protein-coding]	TcasGA2_TC005236; LOC658166 || LOC107398294; TcasGA2_TC032004
85	NC_007417.3	1910805	Deletion	T	-	Homozygous	26	26	100	1	14	15	0.48	37.85	29	29	19	20		1	1	no	-/-	No	1	108.77	XP_015837412.1:c.377delA	XP_015837412.1:p.His126fs	LOC658166, LOC107398294	658166 , 107398294		658166 [Gene Symbol: LOC658166] [Locus Tag: TcasGA2_TC005236] [Chromosome: LG2] [Map Location: ] [Description: thrombospondin type-1 domain-containing protein 1] [Gene Type: protein-coding] || 107398294 [Gene Symbol: LOC107398294] [Locus Tag: TcasGA2_TC032004] [Chromosome: LG2] [Map Location: ] [Description: uncharacterized LOC107398294] [Gene Type: protein-coding]	TcasGA2_TC005236; LOC658166 || LOC107398294; TcasGA2_TC032004
86	NC_007417.3	1910836	SNV	T	C	Homozygous	25	25	100	1	11	16	0.41	39.64	27	27	17	18		1	1	no	C/C	No	1	95.16	XP_015837412.1:c.346A>G	XP_015837412.1:p.Met116Val	LOC658166, LOC107398294	658166 , 107398294		658166 [Gene Symbol: LOC658166] [Locus Tag: TcasGA2_TC005236] [Chromosome: LG2] [Map Location: ] [Description: thrombospondin type-1 domain-containing protein 1] [Gene Type: protein-coding] || 107398294 [Gene Symbol: LOC107398294] [Locus Tag: TcasGA2_TC032004] [Chromosome: LG2] [Map Location: ] [Description: uncharacterized LOC107398294] [Gene Type: protein-coding]	TcasGA2_TC005236; LOC658166 || LOC107398294; TcasGA2_TC032004
87	NC_007417.3	2411347	SNV	G	A	Homozygous	21	21	100	1	12	9	0.43	39.19	21	21	14	12		1	1	no	A/A	No	1	84.7	XP_015838988.1:c.1475C>T	XP_015838988.1:p.Thr492Ile	LOC100141711	100141711		100141711 [Gene Symbol: LOC100141711] [Locus Tag: TcasGA2_TC004562] [Chromosome: LG2] [Map Location: ] [Description: uncharacterized LOC100141711] [Gene Type: protein-coding]	LOC100141711; TcasGA2_TC004562
88	NC_007417.3	2411359	SNV	A	G	Homozygous	20	20	100	1	12	8	0.4	39.1	20	20	13	12		1	1	no	G/G	No	1	80.09	XP_015838988.1:c.1463T>C	XP_015838988.1:p.Ile488Thr	LOC100141711	100141711		100141711 [Gene Symbol: LOC100141711] [Locus Tag: TcasGA2_TC004562] [Chromosome: LG2] [Map Location: ] [Description: uncharacterized LOC100141711] [Gene Type: protein-coding]	LOC100141711; TcasGA2_TC004562
89	NC_007417.3	2449462	SNV	T	C	Homozygous	20	23	86.96	0.95	11	9	0.45	38.4	20	23	12	11		0.98	1	no	C/C	No	1	13.22	XP_008200824.1:c.[392T>C]; XP_967953.2:c.[392T>C]; XP_976189.2:c.[392T>C]	XP_008200824.1:p.[Val131Ala]; XP_967953.2:p.[Val131Ala]; XP_976189.2:p.[Val131Ala]	LOC656404	656404		656404 [Gene Symbol: LOC656404] [Locus Tag: TcasGA2_TC004824] [Chromosome: LG2] [Map Location: ] [Description: hypothetical protein] [Gene Type: protein-coding]	LOC656404; TcasGA2_TC004824
90	NC_007417.3	3251979	SNV	A	C	Homozygous	18	20	90	0.99	12	10	0.45	39.06	22	24	11	13		0.99	1	no	C/C	No	1	22.87	XP_015837890.1:c.2221T>G	XP_015837890.1:p.Phe741Val	LOC103314980	103314980		103314980 [Gene Symbol: LOC103314980] [Locus Tag: TcasGA2_TC004523] [Chromosome: LG2] [Map Location: LG2|LG2] [Description: uncharacterized LOC103314980] [Gene Type: protein-coding]	P46; LOC103314980; TcasGA2_TC004523
91	NC_007417.3	3665163	SNV	C	T	Heterozygous	10	20	50	1	8	5	0.38	37.7	13	26	6	9	0.53	0.7	1	no	C/T	No	1	81.97	XP_015839059.1:c.2110G>A	XP_015839059.1:p.Glu704Lys	LOC658704	658704		658704 [Gene Symbol: LOC658704] [Locus Tag: TcasGA2_TC004504] [Chromosome: LG2] [Map Location: ] [Description: protein FAM184A] [Gene Type: protein-coding]	TcasGA2_TC004504; LOC658704
92	NC_007417.3	3665178	SNV	C	T	Homozygous	21	21	100	1	14	10	0.42	37.57	24	24	12	16		1	1	no	T/T	No	1	84.71	XP_015839059.1:c.2095G>A	XP_015839059.1:p.Gly699Arg	LOC658704	658704		658704 [Gene Symbol: LOC658704] [Locus Tag: TcasGA2_TC004504] [Chromosome: LG2] [Map Location: ] [Description: protein FAM184A] [Gene Type: protein-coding]	TcasGA2_TC004504; LOC658704
93	NC_007417.3	3666810	SNV	G	T	Homozygous	22	22	100	1	10	19	0.34	38.95	29	29	12	13		1	1	no	T/T	No	1	87.71	XP_015839059.1:c.671C>A	XP_015839059.1:p.Thr224Asn	LOC658704	658704		658704 [Gene Symbol: LOC658704] [Locus Tag: TcasGA2_TC004504] [Chromosome: LG2] [Map Location: ] [Description: protein FAM184A] [Gene Type: protein-coding]	TcasGA2_TC004504; LOC658704
94	NC_007417.3	3743102	SNV	G	A	Heterozygous	7	23	30.43	1	3	4	0.43	35.29	7	25	5	5	-1.3	0.34	1	no	A/G	No	1	38.14	XP_015838488.1:c.[748C>T]; XP_008200885.1:c.[748C>T]; XP_015838479.1:c.[748C>T]; XP_008200884.1:c.[748C>T]; XP_015838476.1:c.[748C>T]	XP_015838488.1:p.[Leu250Phe]; XP_008200885.1:p.[Leu250Phe]; XP_015838479.1:p.[Leu250Phe]; XP_008200884.1:p.[Leu250Phe]; XP_015838476.1:p.[Leu250Phe]	LOC659560	659560		659560 [Gene Symbol: LOC659560] [Locus Tag: TcasGA2_TC004497] [Chromosome: LG2] [Map Location: ] [Description: protein hu-li tai shao] [Gene Type: protein-coding]	hts; TcasGA2_TC004497; LOC659560
95	NC_007417.3	3757790	SNV	T	C	Homozygous	20	20	100	1	12	14	0.46	39.6	26	26	11	14		1	1	no	C/C	No	1	80.12	XP_008200886.1:c.428A>G	XP_008200886.1:p.His143Arg	LOC659762	659762		659762 [Gene Symbol: LOC659762] [Locus Tag: TcasGA2_TC004496] [Chromosome: LG2] [Map Location: LG2|LG2] [Description: Fanconi anemia group I protein homolog] [Gene Type: protein-coding]	TcasGA2_TC004496; LOC659762
96	NC_007417.3	4308521	SNV	G	T	Homozygous	22	22	100	1	11	12	0.48	36.5	23	23	16	13		1	1	no	T/T	No	1	87.71	XP_976370.1:c.673C>A	XP_976370.1:p.Pro225Thr	LOC661087	661087		661087 [Gene Symbol: LOC661087] [Locus Tag: TcasGA2_TC004478] [Chromosome: LG2] [Map Location: ] [Description: uncharacterized LOC661087] [Gene Type: protein-coding]	LOC661087; TcasGA2_TC004478
97	NC_007417.3	4567739..4567741	Deletion	CGA	-	Homozygous	21	21	100	1	11	10	0.48	35.05	21	21	7	14		1	1	no	-/-	No	1	200	XP_008200863.1:c.818_820delCGA	XP_008200863.1:p.Thr279del	Srf	661307	serum response factor	661307 [Gene Symbol: Srf] [Locus Tag: TcasGA2_TC004911] [Chromosome: LG2] [Map Location: ] [Description: serum response factor] [Gene Type: protein-coding]	Srf; bs; TcasGA2_TC004911
98	NC_007417.3	4850135	SNV	A	C	Heterozygous	15	22	68.18	1	12	5	0.29	37.67	17	24	9	13	0	0.97	0.88	no	A/C	No	1	37.04	XP_015838119.1:c.[6598-17318T>G]; XP_015838115.1:c.[6598-17318T>G]; XP_008200937.1:c.[171T>G]	XP_008200937.1:p.Asp57Glu	LOC655913, LOC654906	655913 , 654906		655913 [Gene Symbol: LOC655913] [Locus Tag: TcasGA2_TC004440] [Chromosome: LG2] [Map Location: ] [Description: vacuolar protein sorting-associated protein 13C] [Gene Type: protein-coding] || 654906 [Gene Symbol: LOC654906] [Locus Tag: TcasGA2_TC004450] [Chromosome: LG2] [Map Location: ] [Description: glutathione S-transferase 1] [Gene Type: protein-coding]	LOC655913; TcasGA2_TC004440 || TcasGA2_TC004450; LOC654906
99	NC_007417.3	4933116	SNV	T	A	Homozygous	22	22	100	1	9	14	0.39	37.77	23	23	12	12		1	1	no	A/A	No	1	87.7	XP_967796.2:c.4030A>T	XP_967796.2:p.Thr1344Ser	LOC656158	656158		656158 [Gene Symbol: LOC656158] [Locus Tag: TcasGA2_TC004438] [Chromosome: LG2] [Map Location: ] [Description: toll-like receptor 3] [Gene Type: protein-coding]	LOC656158; Toll3; TcasGA2_TC004438
100	NC_007417.3	4949349	SNV	G	C	Homozygous	20	20	100	1	6	15	0.29	38.1	21	21	9	10		1	1	no	C/C	No	1	80.12	XP_015838527.1:c.[221G>C]; XP_008200948.1:c.[221G>C]	XP_015838527.1:p.[Ser74Thr]; XP_008200948.1:p.[Ser74Thr]	LOC103315046	103315046		103315046 [Gene Symbol: LOC103315046] [Locus Tag: TcasGA2_TC004945] [Chromosome: LG2] [Map Location: ] [Description: uncharacterized LOC103315046] [Gene Type: protein-coding]	LOC103315046; TcasGA2_TC004945
101	NC_007417.3	4949357	SNV	A	G	Homozygous	20	20	100	1	6	15	0.29	38.75	21	21	9	10		1	1	no	G/G	No	1	80.09	XP_015838527.1:c.[229A>G]; XP_008200948.1:c.[229A>G]	XP_015838527.1:p.[Thr77Ala]; XP_008200948.1:p.[Thr77Ala]	LOC103315046	103315046		103315046 [Gene Symbol: LOC103315046] [Locus Tag: TcasGA2_TC004945] [Chromosome: LG2] [Map Location: ] [Description: uncharacterized LOC103315046] [Gene Type: protein-coding]	LOC103315046; TcasGA2_TC004945
102	NC_007417.3	4993462	SNV	G	A	Heterozygous	7	25	28	1	7	2	0.22	39.71	9	28	6	7	1.66	0.18	0.93	no	A/G	No	1	32.38	XP_008200957.1:c.1654G>A	XP_008200957.1:p.Asp552Asn	LOC657239	657239		657239 [Gene Symbol: LOC657239] [Locus Tag: TcasGA2_TC004952] [Chromosome: LG2] [Map Location: ] [Description: aminopeptidase N] [Gene Type: protein-coding]	LOC657239; TcasGA2_TC004952
103	NC_007417.3	4993472	SNV	C	T	Heterozygous	7	26	26.92	1	7	3	0.3	38.14	10	32	7	7	-0.58	0.36	0.97	no	C/T	No	1	29.48	XP_008200957.1:c.1664C>T	XP_008200957.1:p.Thr555Ile	LOC657239	657239		657239 [Gene Symbol: LOC657239] [Locus Tag: TcasGA2_TC004952] [Chromosome: LG2] [Map Location: ] [Description: aminopeptidase N] [Gene Type: protein-coding]	LOC657239; TcasGA2_TC004952
104	NC_007417.3	4993520	SNV	A	T	Heterozygous	11	33	33.33	1	6	6	0.5	40.09	12	34	8	10	2.58	0.61	0.96	no	A/T	No	1	61.09	XP_008200957.1:c.1712A>T	XP_008200957.1:p.Asn571Ile	LOC657239	657239		657239 [Gene Symbol: LOC657239] [Locus Tag: TcasGA2_TC004952] [Chromosome: LG2] [Map Location: ] [Description: aminopeptidase N] [Gene Type: protein-coding]	LOC657239; TcasGA2_TC004952
105	NC_007417.3	4993538	SNV	C	T	Heterozygous	10	30	33.33	1	5	5	0.5	39	10	30	7	9	0.77	0.23	0.88	no	C/T	No	1	56.49	XP_008200957.1:c.1730C>T	XP_008200957.1:p.Thr577Ile	LOC657239	657239		657239 [Gene Symbol: LOC657239] [Locus Tag: TcasGA2_TC004952] [Chromosome: LG2] [Map Location: ] [Description: aminopeptidase N] [Gene Type: protein-coding]	LOC657239; TcasGA2_TC004952
106	NC_007417.3	4993575	SNV	G	C	Heterozygous	6	24	25	0.99	3	3	0.5	36.33	6	25	4	5	-1.37	0.67	0.81	no	C/G	No	1	22.21	XP_008200957.1:c.1767G>C	XP_008200957.1:p.Arg589Ser	LOC657239	657239		657239 [Gene Symbol: LOC657239] [Locus Tag: TcasGA2_TC004952] [Chromosome: LG2] [Map Location: ] [Description: aminopeptidase N] [Gene Type: protein-coding]	LOC657239; TcasGA2_TC004952
107	NC_007417.3	4993583	SNV	C	T	Heterozygous	5	23	21.74	0.95	2	3	0.4	36.6	5	24	4	4	-1.42	0.92	0.95	no	C/T	No	1	12.7	XP_008200957.1:c.1775C>T	XP_008200957.1:p.Ser592Leu	LOC657239	657239		657239 [Gene Symbol: LOC657239] [Locus Tag: TcasGA2_TC004952] [Chromosome: LG2] [Map Location: ] [Description: aminopeptidase N] [Gene Type: protein-coding]	LOC657239; TcasGA2_TC004952
108	NC_007417.3	4993634	SNV	G	A	Heterozygous	6	24	25	0.99	4	2	0.33	40	6	24	5	3	1.1	0.22	0.86	no	A/G	No	1	22.47	XP_008200957.1:c.1826G>A	XP_008200957.1:p.Arg609His	LOC657239	657239		657239 [Gene Symbol: LOC657239] [Locus Tag: TcasGA2_TC004952] [Chromosome: LG2] [Map Location: ] [Description: aminopeptidase N] [Gene Type: protein-coding]	LOC657239; TcasGA2_TC004952
109	NC_007417.3	4993640	SNV	A	C	Heterozygous	6	22	27.27	1	4	2	0.33	39.83	6	22	5	3	1.36	0.16	0.94	no	A/C	No	1	28.65	XP_008200957.1:c.1832A>C	XP_008200957.1:p.Asn611Thr	LOC657239	657239		657239 [Gene Symbol: LOC657239] [Locus Tag: TcasGA2_TC004952] [Chromosome: LG2] [Map Location: ] [Description: aminopeptidase N] [Gene Type: protein-coding]	LOC657239; TcasGA2_TC004952
110	NC_007417.3	4993665	SNV	G	T	Heterozygous	9	26	34.62	1	9	0	0	39.67	9	28	5	6	1.05	0.08	0.17	no	G/T	No	1	51.55	XP_008200957.1:c.1857G>T	XP_008200957.1:p.Leu619Phe	LOC657239	657239		657239 [Gene Symbol: LOC657239] [Locus Tag: TcasGA2_TC004952] [Chromosome: LG2] [Map Location: ] [Description: aminopeptidase N] [Gene Type: protein-coding]	LOC657239; TcasGA2_TC004952
111	NC_007417.3	4993677	SNV	G	T	Homozygous	27	27	100	1	20	11	0.35	38.56	31	31	17	19		1	1	no	T/T	No	1	102.75	XP_008200957.1:c.1869G>T	XP_008200957.1:p.Glu623Asp	LOC657239	657239		657239 [Gene Symbol: LOC657239] [Locus Tag: TcasGA2_TC004952] [Chromosome: LG2] [Map Location: ] [Description: aminopeptidase N] [Gene Type: protein-coding]	LOC657239; TcasGA2_TC004952
112	NC_007417.3	5326665	SNV	C	G	Homozygous	27	27	100	1	16	14	0.47	38.74	30	30	11	18		1	1	no	G/G	No	1	101.16	XP_008200967.1:c.1118C>G	XP_008200967.1:p.Ala373Gly	LOC658845	658845		658845 [Gene Symbol: LOC658845] [Locus Tag: TcasGA2_TC004966] [Chromosome: LG2] [Map Location: ] [Description: saccharopine dehydrogenase-like oxidoreductase] [Gene Type: protein-coding]	TcasGA2_TC004966; LOC658845
113	NC_007417.3	5843689	SNV	G	C	Homozygous	23	23	100	1	14	9	0.39	37.43	23	23	15	14		1	1	no	C/C	No	1	89.14	XP_015840675.1:c.[1205G>C]; XP_015840663.1:c.[1032+773C>G]; XP_015840664.1:c.[1037+410C>G]	XP_015840675.1:p.Arg402Pro	LOC103315127, LOC100142296	103315127 , 100142296		103315127 [Gene Symbol: LOC103315127] [Locus Tag: TcasGA2_TC000761] [Chromosome: LG2] [Map Location: ] [Description: regulator of hypoxia-inducible factor 1] [Gene Type: protein-coding] || 100142296 [Gene Symbol: LOC100142296] [Locus Tag: TcasGA2_TC000801] [Chromosome: LG2] [Map Location: ] [Description: RNA polymerase II-associated factor 1 homolog] [Gene Type: protein-coding]	LOC103315127; TcasGA2_TC000761 || TcasGA2_TC000801; LOC100142296
114	NC_007417.3	5912038	SNV	T	A	Homozygous	21	21	100	1	7	19	0.27	38.71	26	26	14	12		1	1	no	A/A	No	1	84.69	XP_008201329.1:c.31A>T	XP_008201329.1:p.Ile11Phe	LOC103315156	103315156		103315156 [Gene Symbol: LOC103315156] [Locus Tag: TcasGA2_TC032050] [Chromosome: LG2] [Map Location: ] [Description: leucine-rich repeat-containing G-protein coupled receptor 4-like] [Gene Type: protein-coding]	LOC103315156; TcasGA2_TC032050
115	NC_007417.3	6610230	SNV	A	G	Homozygous	20	20	100	1	4	17	0.19	38.65	21	21	12	14		1	1	no	G/G	No	1	80.09	XP_008201369.1:c.640A>G	XP_008201369.1:p.Asn214Asp	LOC663324	663324		663324 [Gene Symbol: LOC663324] [Locus Tag: TcasGA2_TC030989] [Chromosome: LG2] [Map Location: ] [Description: anosmin-1] [Gene Type: protein-coding]	TcasGA2_TC030989; LOC663324
116	NC_007417.3	6615915	SNV	T	C	Homozygous	20	20	100	1	6	16	0.27	39.85	22	22	15	11		1	1	no	C/C	No	1	80.12	XP_008201370.1:c.349T>C	XP_008201370.1:p.Ser117Pro	LOC103315168	103315168		103315168 [Gene Symbol: LOC103315168] [Locus Tag: TcasGA2_TC000840] [Chromosome: LG2] [Map Location: ] [Description: zinc finger protein 557] [Gene Type: protein-coding]	LOC103315168; TcasGA2_TC000840
117	NC_007417.3	6719990	SNV	A	G	Homozygous	22	22	100	1	9	20	0.31	35.27	29	29	8	9		1	1	no	G/G	No	1	86.11	XP_015840913.1:c.115T>C	XP_015840913.1:p.Ser39Pro	LOC107399279	107399279		107399279 [Gene Symbol: LOC107399279] [Locus Tag: ] [Chromosome: LG2] [Map Location: ] [Description: odorant receptor Or1-like] [Gene Type: protein-coding]	LOC107399279
118	NC_007417.3	6859990	SNV	C	T	Homozygous	21	21	100	1	19	3	0.14	36.48	22	22	9	15		1	1	no	T/T	No	1	84.7	XP_015840479.1:c.[441+8526C>T]; XP_008201382.2:c.[441+8526C>T]; XP_015839833.1:c.[829G>A]; XP_015840483.1:c.[441+8526C>T]; XP_015840482.1:c.[441+8526C>T]; XP_015840480.1:c.[441+8526C>T]	XP_015839833.1:p.Gly277Ser	LOC663521, LOC662463	663521 , 662463		663521 [Gene Symbol: LOC663521] [Locus Tag: TcasGA2_TC000848] [Chromosome: LG2] [Map Location: ] [Description: disks large 1 tumor suppressor protein] [Gene Type: protein-coding] || 662463 [Gene Symbol: LOC662463] [Locus Tag: TcasGA2_TC000723] [Chromosome: LG2] [Map Location: ] [Description: uncharacterized LOC662463] [Gene Type: protein-coding]	LOC663521; TcasGA2_TC000848 || TcasGA2_TC000723; LOC662463
119	NC_007417.3	6867131	SNV	A	G	Homozygous	20	20	100	1	10	12	0.45	36.7	22	22	10	10		1	1	no	G/G	No	1	80.09	XP_015840480.1:c.[441+15667A>G]; XP_015840483.1:c.[441+15667A>G]; XP_015839837.1:c.[412T>C]; XP_015840479.1:c.[441+15667A>G]; XP_008201382.2:c.[441+15667A>G]; XP_015840482.1:c.[441+15667A>G]	XP_015839837.1:p.Ser138Pro	LOC663521, LOC103315172	663521 , 103315172		663521 [Gene Symbol: LOC663521] [Locus Tag: TcasGA2_TC000848] [Chromosome: LG2] [Map Location: ] [Description: disks large 1 tumor suppressor protein] [Gene Type: protein-coding] || 103315172 [Gene Symbol: LOC103315172] [Locus Tag: ] [Chromosome: LG2] [Map Location: ] [Description: larval cuticle protein A2B-like] [Gene Type: protein-coding]	LOC663521; TcasGA2_TC000848 || LOC103315172
120	NC_007417.3	7151947	SNV	A	G	Homozygous	21	21	100	1	8	14	0.36	36.57	22	22	11	13		1	1	no	G/G	No	1	83.1	XP_015840449.1:c.[40-21552T>C]; XP_008201399.1:c.[170A>G]	XP_008201399.1:p.Lys57Arg	LOC663672, LOC103315177	663672 , 103315177		663672 [Gene Symbol: LOC663672] [Locus Tag: TcasGA2_TC000706] [Chromosome: LG2] [Map Location: ] [Description: protein sprint] [Gene Type: protein-coding] || 103315177 [Gene Symbol: LOC103315177] [Locus Tag: TcasGA2_TC000859] [Chromosome: LG2] [Map Location: ] [Description: uncharacterized LOC103315177] [Gene Type: protein-coding]	TcasGA2_TC000706; LOC663672 || TcasGA2_TC000859; LOC103315177
121	NC_007417.3	7586759	SNV	T	C	Heterozygous	11	25	44	1	5	6	0.45	37.27	11	25	6	6	-1.64	0.7	0.74	no	C/T	No	1	84.58	XP_008201416.1:c.[290A>G]; XP_975007.2:c.[290A>G]	XP_008201416.1:p.[Lys97Arg]; XP_975007.2:p.[Lys97Arg]	LOC663884	663884		663884 [Gene Symbol: LOC663884] [Locus Tag: TcasGA2_TC000688] [Chromosome: LG2] [Map Location: ] [Description: glycerol-3-phosphate dehydrogenase [NAD(+)], cytoplasmic] [Gene Type: protein-coding]	LOC663884; TcasGA2_TC000688
122	NC_007417.3	7587045	SNV	G	C	Heterozygous	11	20	55	1	6	8	0.43	37.73	14	25	9	9	-0.65	0.69	0.99	no	C/G	No	1	71.64	XP_008201416.1:c.[148C>G]; XP_975007.2:c.[148C>G]	XP_008201416.1:p.[His50Asp]; XP_975007.2:p.[His50Asp]	LOC663884	663884		663884 [Gene Symbol: LOC663884] [Locus Tag: TcasGA2_TC000688] [Chromosome: LG2] [Map Location: ] [Description: glycerol-3-phosphate dehydrogenase [NAD(+)], cytoplasmic] [Gene Type: protein-coding]	LOC663884; TcasGA2_TC000688
123	NC_007417.3	7638473..7638474	MNV	AA	CG	Heterozygous	14	21	66.67	1	3	14	0.18	37.14	17	24	12	13	-1.69	0.61	0.7	no	complex	No	1	200	XP_008201430.1:c.[344_345delTTinsCG]; XP_008201431.1:c.[344_345delTTinsCG]	XP_008201430.1:p.[Ile115Thr]; XP_008201431.1:p.[Ile115Thr]	LOC664053	664053		664053 [Gene Symbol: LOC664053] [Locus Tag: TcasGA2_TC000677] [Chromosome: LG2] [Map Location: ] [Description: E3 ubiquitin-protein ligase SHPRH] [Gene Type: protein-coding]	LOC664053; TcasGA2_TC000677
124	NC_007417.3	7801375..7801376	MNV	TA	AG	Heterozygous	19	24	79.17	1	5	15	0.25	37.86	20	26	9	11		0.86	1	no	complex	No	1	200	XP_015839909.1:c.1354_1355delTAinsCT	XP_015839909.1:p.Tyr452Leu	LOC664192	664192		664192 [Gene Symbol: LOC664192] [Locus Tag: TcasGA2_TC000665] [Chromosome: LG2] [Map Location: ] [Description: uncharacterized LOC664192] [Gene Type: protein-coding]	TcasGA2_TC000665; LOC664192
125	NC_007417.3	7801376	SNV	A	G	Heterozygous	5	24	20.83	1	2	4	0.33	38.98	6	26	5	5		0.33	0.96	no	complex	No	1	200	XP_015839909.1:c.1354T>C	XP_015839909.1:p.Tyr452His	LOC664192	664192		664192 [Gene Symbol: LOC664192] [Locus Tag: TcasGA2_TC000665] [Chromosome: LG2] [Map Location: ] [Description: uncharacterized LOC664192] [Gene Type: protein-coding]	TcasGA2_TC000665; LOC664192
126	NC_007417.3	7809080	SNV	A	G	Heterozygous	16	21	76.19	0.98	12	7	0.37	37.81	19	28	9	12	0.5	0.94	1	no	A/G	No	1	18.15	XP_008201279.1:c.10A>G	XP_008201279.1:p.Ile4Val	LOC664210	664210		664210 [Gene Symbol: LOC664210] [Locus Tag: TcasGA2_TC000887] [Chromosome: LG2] [Map Location: ] [Description: retinoid-inducible serine carboxypeptidase] [Gene Type: protein-coding]	LOC664210; TcasGA2_TC000887
127	NC_007417.3	8510453	SNV	A	G	Heterozygous	16	21	76.19	0.98	10	9	0.47	36.25	19	24	10	15	1.16	1	1	no	A/G	No	1	18.19	XP_008201248.1:c.[814A>G]; NP_001038090.1:c.[805A>G]	XP_008201248.1:p.[Thr272Ala]; NP_001038090.1:p.[Thr269Ala]	Zen2	652932	zerknullt-related	652932 [Gene Symbol: Zen2] [Locus Tag: TcasGA2_TC000922] [Chromosome: LG2] [Map Location: ] [Description: zerknullt-related] [Gene Type: protein-coding]	TcasGA2_TC000922; Zen2; Tczen2; zen-2
128	NC_007417.3	8647247	Deletion	C	-	Homozygous	23	23	100	1	7	17	0.29	36.57	24	24	11	11		1	1	no	-/-	No	1	99.74	XP_008201469.1:c.1481delC	XP_008201469.1:p.Arg496fs	LOC664379	664379		664379 [Gene Symbol: LOC664379] [Locus Tag: TcasGA2_TC000935] [Chromosome: LG2] [Map Location: ] [Description: high-affinity choline transporter 1] [Gene Type: protein-coding]	LOC664379; TcasGA2_TC000935
129	NC_007417.3	8849554	SNV	G	T	Heterozygous	9	20	45	1	3	8	0.27	36.56	11	24	5	5	-1.94	0.25	1	no	G/T	No	1	68.35	XP_008195282.1:c.501C>A	XP_008195282.1:p.Asp167Glu	LOC655255	655255		655255 [Gene Symbol: LOC655255] [Locus Tag: TcasGA2_TC000631] [Chromosome: LG2] [Map Location: ] [Description: origin recognition complex subunit 2] [Gene Type: protein-coding]	TcasGA2_TC000631; LOC655255
130	NC_007417.3	8849632	SNV	G	T	Heterozygous	11	21	52.38	1	4	7	0.36	37.36	11	23	4	7	0.35	0.17	0.99	no	G/T	No	1	81.83	XP_008195282.1:c.423C>A	XP_008195282.1:p.Asp141Glu	LOC655255	655255		655255 [Gene Symbol: LOC655255] [Locus Tag: TcasGA2_TC000631] [Chromosome: LG2] [Map Location: ] [Description: origin recognition complex subunit 2] [Gene Type: protein-coding]	TcasGA2_TC000631; LOC655255
131	NC_007417.3	8884951	SNV	T	C	Heterozygous	10	20	50	1	1	10	0.09	37.4	11	22	5	7	-0.11	0.26	0.36	no	C/T	No	1	82.02	XP_967567.1:c.496A>G	XP_967567.1:p.Thr166Ala	LOC655917	655917		655917 [Gene Symbol: LOC655917] [Locus Tag: TcasGA2_TC000627] [Chromosome: LG2] [Map Location: ] [Description: cysteine and histidine-rich domain-containing protein] [Gene Type: protein-coding]	TcasGA2_TC000627; LOC655917
132	NC_007417.3	8886099	SNV	C	T	Heterozygous	10	21	47.62	1	8	2	0.2	39.2	10	23	6	8	1.48	0.74	0.98	no	C/T	No	1	81.46	XP_967646.1:c.2042G>A	XP_967646.1:p.Arg681Lys	LOC655996	655996		655996 [Gene Symbol: LOC655996] [Locus Tag: TcasGA2_TC000626] [Chromosome: LG2] [Map Location: ] [Description: molybdenum cofactor sulfurase 1] [Gene Type: protein-coding]	TcasGA2_TC000626; LOC655996
133	NC_007417.3	8900326	SNV	C	T	Heterozygous	11	20	55	1	6	6	0.5	37.36	12	21	7	9	-1.44	0.84	0.99	no	C/T	No	1	72.94	XP_967720.2:c.[1529G>A]; XP_015840574.1:c.[1529G>A]; XP_015840573.1:c.[1529G>A]	XP_967720.2:p.[Arg510Lys]; XP_015840574.1:p.[Arg510Lys]; XP_015840573.1:p.[Arg510Lys]	LOC656076	656076		656076 [Gene Symbol: LOC656076] [Locus Tag: TcasGA2_TC000625] [Chromosome: LG2] [Map Location: ] [Description: chaoptin] [Gene Type: protein-coding]	LOC656076; TcasGA2_TC000625
134	NC_007417.3	9029150	SNV	G	T	Heterozygous	8	28	28.57	1	4	7	0.36	35.62	11	31	5	4	-2.11	0.23	0.74	no	G/T	No	1	33.3	XP_008195501.1:c.[3958G>T]; XP_015840622.1:c.[3958G>T]; XP_008195506.1:c.[3958G>T]	XP_008195501.1:p.[Ala1320Ser]; XP_015840622.1:p.[Ala1320Ser]; XP_008195506.1:p.[Ala1320Ser]	LOC657865	657865		657865 [Gene Symbol: LOC657865] [Locus Tag: TcasGA2_TC000971] [Chromosome: LG2] [Map Location: ] [Description: probable E3 ubiquitin-protein ligase HERC1] [Gene Type: protein-coding]	TcasGA2_TC000971; LOC657865
135	NC_007417.3	9085115	SNV	G	C	Heterozygous	9	21	42.86	1	6	4	0.4	37.67	10	23	8	8	0	0.82	0.95	no	C/G	No	1	68.88	XP_969760.1:c.1439G>C	XP_969760.1:p.Gly480Ala	LOC658266	658266		658266 [Gene Symbol: LOC658266] [Locus Tag: TcasGA2_TC000974] [Chromosome: LG2] [Map Location: ] [Description: protein NRDE2 homolog] [Gene Type: protein-coding]	LOC658266; TcasGA2_TC000974
136	NC_007417.3	9091068	SNV	T	G	Heterozygous	11	21	52.38	1	6	8	0.43	38.45	14	24	7	8	0.14	0.26	0.99	no	G/T	No	1	78.23	XP_008201029.1:c.1075T>G	XP_008201029.1:p.Ser359Ala	LOC658408	658408		658408 [Gene Symbol: LOC658408] [Locus Tag: TcasGA2_TC000975] [Chromosome: LG2] [Map Location: ] [Description: dolichol kinase] [Gene Type: protein-coding]	LOC658408; TcasGA2_TC000975
137	NC_007417.3	9099736..9099737	MNV	CC	TT	Heterozygous	10	23	43.48	1	10	2	0.17	38.85	12	25	6	8	0.53	0.57	0.95	no	complex	No	1	200	XP_970105.1:c.1587_1588delGGinsAA	XP_970105.1:p.Val530Ile	LOC658647	658647		658647 [Gene Symbol: LOC658647] [Locus Tag: TcasGA2_TC000607] [Chromosome: LG2] [Map Location: ] [Description: MYCBP-associated protein] [Gene Type: protein-coding]	LOC658647; TcasGA2_TC000607
138	NC_007417.3	9099820..9099821	MNV	TC	CT	Homozygous	20	20	100	1	12	12	0.5	38.5	24	24	14	17		1	1	no	CT/CT	No	1	200	XP_970105.1:c.1503_1504delGAinsAG	XP_970105.1:p.Thr502Ala	LOC658647	658647		658647 [Gene Symbol: LOC658647] [Locus Tag: TcasGA2_TC000607] [Chromosome: LG2] [Map Location: ] [Description: MYCBP-associated protein] [Gene Type: protein-coding]	LOC658647; TcasGA2_TC000607
139	NC_007417.3	9100288	SNV	G	T	Homozygous	19	20	95	1	9	12	0.43	38.89	21	22	9	14		1	1	no	T/T	No	1	49.67	XP_970105.1:c.1036C>A	XP_970105.1:p.Gln346Lys	LOC658647	658647		658647 [Gene Symbol: LOC658647] [Locus Tag: TcasGA2_TC000607] [Chromosome: LG2] [Map Location: ] [Description: MYCBP-associated protein] [Gene Type: protein-coding]	LOC658647; TcasGA2_TC000607
140	NC_007417.3	9110862	SNV	G	C	Heterozygous	22	28	78.57	0.93	16	6	0.27	38.95	22	30	10	14	-0.36	0.46	0.82	no	C/G	No	1	11.41	XP_015840568.1:c.[8303C>G]; XP_015840569.1:c.[8252C>G]; XP_015840570.1:c.[8240C>G]; XP_015840566.1:c.[8402C>G]; XP_015840567.1:c.[8363C>G]; XP_015840565.1:c.[8402C>G]; XP_015840564.1:c.[8414C>G]	XP_015840568.1:p.[Thr2768Ser]; XP_015840569.1:p.[Thr2751Ser]; XP_015840570.1:p.[Thr2747Ser]; XP_015840566.1:p.[Thr2801Ser]; XP_015840567.1:p.[Thr2788Ser]; XP_015840565.1:p.[Thr2801Ser]; XP_015840564.1:p.[Thr2805Ser]	LOC658776	658776		658776 [Gene Symbol: LOC658776] [Locus Tag: TcasGA2_TC000606] [Chromosome: LG2] [Map Location: ] [Description: histone-lysine N-methyltransferase 2C] [Gene Type: protein-coding]	LOC658776; TcasGA2_TC000606
141	NC_007417.3	9111303..9111308	Deletion	TGCTGT	-	Heterozygous	9	23	39.13	1	0	9	0	37.78	9	24	5	4	1.3	0.12	0.34	no	complex	No	1	200	XP_015840569.1:c.[7806_7811delACAGCA]; XP_015840568.1:c.[7857_7862delACAGCA]; XP_015840570.1:c.[7794_7799delACAGCA]; XP_015840565.1:c.[7956_7961delACAGCA]; XP_015840564.1:c.[7968_7973delACAGCA]; XP_015840566.1:c.[7956_7961delACAGCA]; XP_015840567.1:c.[7917_7922delACAGCA]	XP_015840569.1:p.[Gln2609_Gln2610del]; XP_015840568.1:p.[Gln2626_Gln2627del]; XP_015840570.1:p.[Gln2605_Gln2606del]; XP_015840565.1:p.[Gln2659_Gln2660del]; XP_015840564.1:p.[Gln2663_Gln2664del]; XP_015840566.1:p.[Gln2659_Gln2660del]; XP_015840567.1:p.[Gln2646_Gln2647del]	LOC658776	658776		658776 [Gene Symbol: LOC658776] [Locus Tag: TcasGA2_TC000606] [Chromosome: LG2] [Map Location: ] [Description: histone-lysine N-methyltransferase 2C] [Gene Type: protein-coding]	LOC658776; TcasGA2_TC000606
142	NC_007417.3	9305300	SNV	T	C	Heterozygous	8	28	28.57	1	1	8	0.11	37.62	9	31	4	5	-0.46	0.3	0.27	no	C/T	No	1	37.87	XP_971263.2:c.1156A>G	XP_971263.2:p.Thr386Ala	LOC659904	659904		659904 [Gene Symbol: LOC659904] [Locus Tag: TcasGA2_TC000592] [Chromosome: LG2] [Map Location: ] [Description: uncharacterized LOC659904] [Gene Type: protein-coding]	TcasGA2_TC000592; LOC659904
143	NC_007417.3	9305304	SNV	T	C	Heterozygous	6	26	23.08	0.98	1	6	0.14	38.83	7	29	3	4	0.61	0.21	0.53	no	C/T	No	1	18.07	XP_971263.2:c.1152A>G	XP_971263.2:p.Ile384Met	LOC659904	659904		659904 [Gene Symbol: LOC659904] [Locus Tag: TcasGA2_TC000592] [Chromosome: LG2] [Map Location: ] [Description: uncharacterized LOC659904] [Gene Type: protein-coding]	TcasGA2_TC000592; LOC659904
144	NC_007417.3	9316803	SNV	C	T	Heterozygous	6	22	27.27	1	6	0	0	37.5	6	22	2	6	-1	0.33	0.7	no	C/T	No	1	27.96	XP_015840684.1:c.[2764G>A]; XP_008201053.1:c.[2764G>A]; XP_015840685.1:c.[2764G>A]; XP_971386.1:c.[2761G>A]; XP_008201052.1:c.[2764G>A]	XP_015840684.1:p.[Val922Ile]; XP_008201053.1:p.[Val922Ile]; XP_015840685.1:p.[Val922Ile]; XP_971386.1:p.[Val921Ile]; XP_008201052.1:p.[Val922Ile]	LOC660029	660029		660029 [Gene Symbol: LOC660029] [Locus Tag: TcasGA2_TC000591] [Chromosome: LG2] [Map Location: ] [Description: methyl-CpG-binding domain protein 5] [Gene Type: protein-coding]	LOC660029; TcasGA2_TC000591
145	NC_007417.3	9341892	SNV	C	A	Homozygous	20	24	83.33	0.64	8	18	0.31	37.55	26	30	12	17	-0.66	0.96	1	no	A/A	No	1	4.43	XP_971446.1:c.810G>T	XP_971446.1:p.Gln270His	LOC660093	660093		660093 [Gene Symbol: LOC660093] [Locus Tag: TcasGA2_TC000590] [Chromosome: LG2] [Map Location: ] [Description: dnaJ homolog subfamily A member 1] [Gene Type: protein-coding]	TcasGA2_TC000590; LOC660093
146	NC_007417.3	9359927	SNV	T	A	Homozygous	22	22	100	1	16	9	0.36	36.91	25	25	11	15		1	1	no	A/A	No	1	87.71	XP_971895.2:c.76T>A	XP_971895.2:p.Tyr26Asn	LOC660584	660584		660584 [Gene Symbol: LOC660584] [Locus Tag: TcasGA2_TC000987] [Chromosome: LG2] [Map Location: ] [Description: uncharacterized LOC660584] [Gene Type: protein-coding]	TcasGA2_TC000987; LOC660584
147	NC_007417.3	9380095	SNV	G	T	Homozygous	20	22	90.91	0.99	9	15	0.38	37.3	24	26	11	10		0.99	1	no	T/T	No	1	20.34	XP_008201008.2:c.6079C>A	XP_008201008.2:p.His2027Asn	LOC100142412	100142412		100142412 [Gene Symbol: LOC100142412] [Locus Tag: TcasGA2_TC000586] [Chromosome: LG2] [Map Location: LG2|LG2] [Description: vacuolar protein sorting-associated protein 13A-like] [Gene Type: protein-coding]	TcasGA2_TC000586; LOC100142412
148	NC_007417.3	9474417	SNV	T	G	Heterozygous	9	21	42.86	1	2	7	0.22	38.56	9	23	4	8	1.85	0.42	0.44	no	G/T	No	1	69.6	XP_972413.1:c.[190T>G]; XP_008201071.1:c.[124T>G]	XP_972413.1:p.[Ser64Ala]; XP_008201071.1:p.[Ser42Ala]	LOC661139	661139		661139 [Gene Symbol: LOC661139] [Locus Tag: TcasGA2_TC000992] [Chromosome: LG2] [Map Location: ] [Description: succinate dehydrogenase cytochrome b560 subunit, mitochondrial] [Gene Type: protein-coding]	TcasGA2_TC000992; LOC661139
149	NC_007417.3	9489854	SNV	G	A	Homozygous	22	22	100	1	8	16	0.33	36.41	24	24	11	15		1	1	no	A/A	No	1	87.71	XP_015840791.1:c.[839G>A]; XP_015840790.1:c.[800G>A]; XP_008201075.1:c.[839G>A]; XP_015840788.1:c.[800G>A]; XP_015840792.1:c.[800G>A]; XP_015840789.1:c.[800G>A]; XP_008201074.1:c.[839G>A]; XP_008201076.1:c.[839G>A]; XP_015840793.1:c.[800G>A]	XP_015840791.1:p.[Gly280Asp]; XP_015840790.1:p.[Gly267Asp]; XP_008201075.1:p.[Gly280Asp]; XP_015840788.1:p.[Gly267Asp]; XP_015840792.1:p.[Gly267Asp]; XP_015840789.1:p.[Gly267Asp]; XP_008201074.1:p.[Gly280Asp]; XP_008201076.1:p.[Gly280Asp]; XP_015840793.1:p.[Gly267Asp]	LOC100141942	100141942		100141942 [Gene Symbol: LOC100141942] [Locus Tag: TcasGA2_TC000995] [Chromosome: LG2] [Map Location: ] [Description: uncharacterized LOC100141942] [Gene Type: protein-coding]	TcasGA2_TC000995; LOC100141942
150	NC_007417.3	9619261	SNV	C	T	Homozygous	26	26	100	1	6	21	0.22	39.31	27	27	12	14		1	1	no	T/T	No	1	99.74	XP_008201097.1:c.2579C>T	XP_008201097.1:p.Thr860Ile	LOC661669	661669		661669 [Gene Symbol: LOC661669] [Locus Tag: TcasGA2_TC001001] [Chromosome: LG2] [Map Location: ] [Description: microtubule-associated protein futsch] [Gene Type: protein-coding]	LOC661669; TcasGA2_TC001001
151	NC_007417.3	9631309..9631310	MNV	CT	GC	Homozygous	25	25	100	1	14	12	0.46	38.08	26	26	11	22		1	1	no	GC/GC	No	1	200	XP_015840516.1:c.[123_124delAGinsGC]; XP_008201098.1:c.[123_124delAGinsGC]; XP_008201103.1:c.[72_73delAGinsGC]; XP_015840517.1:c.[123_124delAGinsGC]; XP_008201099.1:c.[72_73delAGinsGC]	XP_015840516.1:p.[Ala42Pro]; XP_008201098.1:p.[Ala42Pro]; XP_008201103.1:p.[Ala25Pro]; XP_015840517.1:p.[Ala42Pro]; XP_008201099.1:p.[Ala25Pro]	LOC661710	661710		661710 [Gene Symbol: LOC661710] [Locus Tag: TcasGA2_TC000571] [Chromosome: LG2] [Map Location: ] [Description: uncharacterized family 31 glucosidase KIAA1161] [Gene Type: protein-coding]	LOC661710; TcasGA2_TC000571
152	NC_007417.3	9915858	SNV	A	G	Heterozygous	6	20	30	1	1	5	0.17	39.33	6	20	4	4	1.69	0.98	1	no	A/G	No	1	34.52	XP_008201125.1:c.[1324A>G]; XP_008201126.1:c.[991-789A>G]	XP_008201125.1:p.Ile442Val	LOC662787, LOC103315090	662787 , 103315090		662787 [Gene Symbol: LOC662787] [Locus Tag: TcasGA2_TC030770] [Chromosome: LG2] [Map Location: ] [Description: lysophospholipid acyltransferase 1] [Gene Type: protein-coding] || 103315090 [Gene Symbol: LOC103315090] [Locus Tag: TcasGA2_TC030746] [Chromosome: LG2] [Map Location: ] [Description: IQ and ubiquitin-like domain-containing protein] [Gene Type: protein-coding]	TcasGA2_TC030770; LOC662787 || LOC103315090; TcasGA2_TC030746
153	NC_007417.3	9925987	SNV	T	C	Homozygous	26	26	100	1	19	12	0.39	37.96	31	31	17	17		1	1	no	C/C	No	1	98.17	XP_015839940.1:c.1409A>G	XP_015839940.1:p.Asn470Ser	LOC661704	661704		661704 [Gene Symbol: LOC661704] [Locus Tag: TcasGA2_TC000547] [Chromosome: LG2] [Map Location: ] [Description: transmembrane protease serine 9] [Gene Type: protein-coding]	P13; LOC661704; TcasGA2_TC000547; H14
154	NC_007417.3	9926537	SNV	G	A	Homozygous	17	20	85	0.71	8	10	0.44	37.65	18	23	11	10		0.9	1	no	A/A	No	1	5.31	XP_015839940.1:c.994C>T	XP_015839940.1:p.His332Tyr	LOC661704	661704		661704 [Gene Symbol: LOC661704] [Locus Tag: TcasGA2_TC000547] [Chromosome: LG2] [Map Location: ] [Description: transmembrane protease serine 9] [Gene Type: protein-coding]	P13; LOC661704; TcasGA2_TC000547; H14
155	NC_007417.3	9928747^9928748	Insertion	-	AA	Heterozygous	17	23	73.91	1	8	10	0.44	37.71	18	25	10	11	0.6	0.99	1	no	complex	No	1	200	XP_015839940.1:c.12_13insTT	XP_015839940.1:p.Thr5fs	LOC661704	661704		661704 [Gene Symbol: LOC661704] [Locus Tag: TcasGA2_TC000547] [Chromosome: LG2] [Map Location: ] [Description: transmembrane protease serine 9] [Gene Type: protein-coding]	P13; LOC661704; TcasGA2_TC000547; H14
156	NC_007417.3	9944898	SNV	C	T	Heterozygous	14	20	70	1	10	8	0.44	38.79	18	24	9	10	0.21	0.79	0.99	no	C/T	No	1	34.67	XP_015840576.1:c.[2702C>T]; XP_015840577.1:c.[2702C>T]; XP_015840575.1:c.[2702C>T]	XP_015840576.1:p.[Ala901Val]; XP_015840577.1:p.[Ala901Val]; XP_015840575.1:p.[Ala901Val]	LOC100141648	100141648		100141648 [Gene Symbol: LOC100141648] [Locus Tag: ] [Chromosome: LG2] [Map Location: LG2|LG2] [Description: uncharacterized LOC100141648] [Gene Type: protein-coding]	LOC100141648
157	NC_007417.3	9944940	SNV	T	A	Heterozygous	15	23	65.22	1	5	12	0.29	39.73	17	30	10	11	1.74	0.52	0.91	no	A/T	No	1	50.7	XP_015840576.1:c.[2744T>A]; XP_015840577.1:c.[2744T>A]; XP_015840575.1:c.[2744T>A]	XP_015840576.1:p.[Phe915Tyr]; XP_015840577.1:p.[Phe915Tyr]; XP_015840575.1:p.[Phe915Tyr]	LOC100141648	100141648		100141648 [Gene Symbol: LOC100141648] [Locus Tag: ] [Chromosome: LG2] [Map Location: LG2|LG2] [Description: uncharacterized LOC100141648] [Gene Type: protein-coding]	LOC100141648
158	NC_007417.3	9954768	SNV	G	C	Heterozygous	16	20	80	0.86	5	11	0.31	36.38	16	20	11	11	-0.43	0.72	1	no	C/G	No	1	8.49	XP_008201133.1:c.[3092G>C]; XP_008201132.1:c.[3092G>C]; XP_008201131.1:c.[3092G>C]	XP_008201133.1:p.[Ser1031Thr]; XP_008201132.1:p.[Ser1031Thr]; XP_008201131.1:p.[Ser1031Thr]	LOC663113	663113		663113 [Gene Symbol: LOC663113] [Locus Tag: TcasGA2_TC001026] [Chromosome: LG2] [Map Location: ] [Description: receptor-mediated endocytosis protein 6 homolog] [Gene Type: protein-coding]	LOC663113; TcasGA2_TC001026
159	NC_007417.3	9976496	SNV	G	A	Heterozygous	6	24	25	0.99	1	5	0.17	34.83	6	32	3	4	-1.07	0.14	0.5	no	A/G	No	1	22.67	XP_015840585.1:c.[224+103G>A]; XP_008201019.1:c.[182G>A]	XP_008201019.1:p.Arg61Lys	LOC103315066	103315066		103315066 [Gene Symbol: LOC103315066] [Locus Tag: TcasGA2_TC001028] [Chromosome: LG2] [Map Location: ] [Description: uncharacterized LOC103315066] [Gene Type: protein-coding]	LOC103315066; TcasGA2_TC001028
160	NC_007417.3	9976564	SNV	G	A	Heterozygous	15	30	50	1	8	7	0.47	38.33	15	32	3	7	0.1	0.31	0.77	no	A/G	No	1	117.79	XP_015840585.1:c.[225-140G>A]; XP_008201019.1:c.[250G>A]	XP_008201019.1:p.Gly84Ser	LOC103315066	103315066		103315066 [Gene Symbol: LOC103315066] [Locus Tag: TcasGA2_TC001028] [Chromosome: LG2] [Map Location: ] [Description: uncharacterized LOC103315066] [Gene Type: protein-coding]	LOC103315066; TcasGA2_TC001028
161	NC_007417.3	9984841	SNV	A	T	Heterozygous	5	23	21.74	0.97	5	0	0	38.2	5	25	2	2	0.45	0.04	0.19	no	A/T	No	1	15.31	XP_001814929.1:c.94A>T	XP_001814929.1:p.Asn32Tyr	LOC100142616	100142616		100142616 [Gene Symbol: LOC100142616] [Locus Tag: TcasGA2_TC001031] [Chromosome: LG2] [Map Location: ] [Description: uncharacterized LOC100142616] [Gene Type: protein-coding]	TcasGA2_TC001031; LOC100142616
162	NC_007417.3	9984883	SNV	G	A	Heterozygous	13	21	61.9	1	3	10	0.23	38.38	13	23	6	7	-0.83	0.47	0.63	no	A/G	No	1	57.27	XP_001814929.1:c.136G>A	XP_001814929.1:p.Asp46Asn	LOC100142616	100142616		100142616 [Gene Symbol: LOC100142616] [Locus Tag: TcasGA2_TC001031] [Chromosome: LG2] [Map Location: ] [Description: uncharacterized LOC100142616] [Gene Type: protein-coding]	TcasGA2_TC001031; LOC100142616
163	NC_007417.3	10031586	SNV	G	A	Homozygous	18	20	90	0.99	9	13	0.41	36.67	22	26	11	16		0.98	1	no	A/A	No	1	20.37	XP_015840643.1:c.[2827C>T]; XP_015840645.1:c.[2827C>T]; XP_015840642.1:c.[2827C>T]; XP_008201155.1:c.[2827C>T]	XP_015840643.1:p.[Pro943Ser]; XP_015840645.1:p.[Pro943Ser]; XP_015840642.1:p.[Pro943Ser]; XP_008201155.1:p.[Pro943Ser]	LOC663484	663484		663484 [Gene Symbol: LOC663484] [Locus Tag: TcasGA2_TC000538] [Chromosome: LG2] [Map Location: ] [Description: DENN domain-containing protein 4C] [Gene Type: protein-coding]	LOC663484; TcasGA2_TC000538
164	NC_007417.3	10127512	SNV	T	C	Heterozygous	5	22	22.73	0.98	3	2	0.4	39	5	26	4	5	2.27	0.14	0.77	no	C/T	No	1	16.45	XP_015840286.1:c.5369A>G	XP_015840286.1:p.Asp1790Gly	LOC103315067	103315067		103315067 [Gene Symbol: LOC103315067] [Locus Tag: TcasGA2_TC000532] [Chromosome: LG2] [Map Location: ] [Description: uncharacterized LOC103315067] [Gene Type: protein-coding]	LOC103315067; TcasGA2_TC000532
165	NC_007417.3	10129866	SNV	C	T	Heterozygous	5	23	21.74	0.95	2	3	0.4	38.4	5	23	4	4	-0.3	0.08	0.69	no	C/T	No	1	12.67	XP_015840286.1:c.3266G>A	XP_015840286.1:p.Cys1089Tyr	LOC103315067	103315067		103315067 [Gene Symbol: LOC103315067] [Locus Tag: TcasGA2_TC000532] [Chromosome: LG2] [Map Location: ] [Description: uncharacterized LOC103315067] [Gene Type: protein-coding]	LOC103315067; TcasGA2_TC000532
166	NC_007417.3	10180194..10180195	MNV	CA	TG	Heterozygous	11	20	55	1	10	1	0.09	39.91	11	23	6	7	3.5	0.22	0.3	no	complex	No	1	200	XP_008201022.1:c.[4328_4329delCAinsTG]; XP_015840738.1:c.[4262_4263delCAinsTG]; XP_015840740.1:c.[4328_4329delCAinsTG]; XP_015840739.1:c.[4328_4329delCAinsTG]	XP_008201022.1:p.[Pro1443Leu]; XP_015840738.1:p.[Pro1421Leu]; XP_015840740.1:p.[Pro1443Leu]; XP_015840739.1:p.[Pro1443Leu]	LOC663795	663795		663795 [Gene Symbol: LOC663795] [Locus Tag: TcasGA2_TC001044] [Chromosome: LG2] [Map Location: ] [Description: uncharacterized LOC663795] [Gene Type: protein-coding]	TcasGA2_TC001044; LOC663795
167	NC_007417.3	10475118	SNV	G	A	Homozygous	21	21	100	1	14	8	0.36	35.29	22	22	12	15		1	1	no	A/A	No	1	84.7	XP_015840701.1:c.[3365G>A]; XP_015840700.1:c.[3365G>A]	XP_015840701.1:p.[Arg1122His]; XP_015840700.1:p.[Arg1122His]	LOC664116	664116		664116 [Gene Symbol: LOC664116] [Locus Tag: TcasGA2_TC001065] [Chromosome: LG2] [Map Location: ] [Description: Nance-Horan syndrome protein] [Gene Type: protein-coding]	LOC664116; TcasGA2_TC001065
168	NC_007417.3	10497371..10497373	Deletion	GAC	-	Homozygous	20	20	100	1	8	15	0.35	35.8	23	23	12	13		1	1	no	-/-	No	1	200	XP_008201026.1:c.354_356delGAC	XP_008201026.1:p.Thr120del	LOC664148	664148		664148 [Gene Symbol: LOC664148] [Locus Tag: TcasGA2_TC001069] [Chromosome: LG2] [Map Location: ] [Description: dissatisfaction] [Gene Type: protein-coding]	dsf; TcasGA2_TC001069; NR2E4; LOC664148
169	NC_007417.3	10503914..10503916	Deletion	GAA	-	Homozygous	26	26	100	1	21	6	0.22	38.15	27	27	14	23		1	1	no	-/-	No	1	200	XP_975277.1:c.1415_1417delTTC	XP_975277.1:p.Leu472del	LOC664171	664171		664171 [Gene Symbol: LOC664171] [Locus Tag: TcasGA2_TC000506] [Chromosome: LG2] [Map Location: ] [Description: chromatin assembly factor 1 subunit B] [Gene Type: protein-coding]	TcasGA2_TC000506; LOC664171
170	NC_007417.3	10506316	SNV	T	A	Homozygous	20	20	100	1	11	14	0.44	39.15	25	25	12	13		1	1	no	A/A	No	1	81.69	XP_008201205.1:c.241T>A	XP_008201205.1:p.Cys81Ser	LOC664178	664178		664178 [Gene Symbol: LOC664178] [Locus Tag: TcasGA2_TC001072] [Chromosome: LG2] [Map Location: ] [Description: anaphase-promoting complex subunit 1] [Gene Type: protein-coding]	LOC664178; shtd; shattered; TcasGA2_TC001072
171	NC_007417.3	10506329	SNV	G	A	Homozygous	22	22	100	1	13	14	0.48	38.27	27	27	12	13		1	1	no	A/A	No	1	87.71	XP_008201205.1:c.254G>A	XP_008201205.1:p.Ser85Asn	LOC664178	664178		664178 [Gene Symbol: LOC664178] [Locus Tag: TcasGA2_TC001072] [Chromosome: LG2] [Map Location: ] [Description: anaphase-promoting complex subunit 1] [Gene Type: protein-coding]	LOC664178; shtd; shattered; TcasGA2_TC001072
172	NC_007417.3	10514647	SNV	G	A	Homozygous	23	23	100	1	10	15	0.4	39.09	25	25	15	14		1	1	no	A/A	No	1	90.71	XP_008201207.1:c.[223+24C>T]; XP_975293.1:c.[223+24C>T]; XP_015840560.1:c.[247C>T]; XP_015840559.1:c.[247C>T]; XP_015840558.1:c.[247C>T]	XP_015840560.1:p.[Pro83Ser]; XP_015840559.1:p.[Pro83Ser]; XP_015840558.1:p.[Pro83Ser]	LOC664187	664187		664187 [Gene Symbol: LOC664187] [Locus Tag: TcasGA2_TC000505] [Chromosome: LG2] [Map Location: ] [Description: importin subunit alpha-5] [Gene Type: protein-coding]	TcasGA2_TC000505; LOC664187
173	NC_007417.3	10834985	SNV	A	C	Homozygous	22	22	100	1	16	8	0.33	36.5	24	24	13	17		1	1	no	C/C	No	1	86.13	XP_008201508.1:c.[1003A>C]; XP_015840836.1:c.[1003A>C]	XP_008201508.1:p.[Ile335Leu]; XP_015840836.1:p.[Ile335Leu]	LOC655505	655505		655505 [Gene Symbol: LOC655505] [Locus Tag: TcasGA2_TC001093] [Chromosome: LG2] [Map Location: ] [Description: poly(ADP-ribose) glycohydrolase ARH3] [Gene Type: protein-coding]	LOC655505; TcasGA2_TC001093
174	NC_007417.3	10924281	SNV	A	G	Homozygous	20	20	100	1	6	15	0.29	37.5	21	21	12	15		1	1	no	G/G	No	1	80.09	XP_008201513.1:c.128T>C	XP_008201513.1:p.Val43Ala	LOC656916	656916		656916 [Gene Symbol: LOC656916] [Locus Tag: TcasGA2_TC000466] [Chromosome: LG2] [Map Location: ] [Description: oxygen-dependent coproporphyrinogen-III oxidase] [Gene Type: protein-coding]	LOC656916; TcasGA2_TC000466
175	NC_007417.3	11061390	SNV	C	A	Homozygous	26	26	100	1	11	15	0.42	38.27	26	26	15	20		1	1	no	A/A	No	1	99.74	NP_001107840.1:c.[4148C>A]; XP_008201496.1:c.[4148C>A]; XP_015839513.1:c.[4148C>A]	NP_001107840.1:p.[Thr1383Asn]; XP_008201496.1:p.[Thr1383Asn]; XP_015839513.1:p.[Thr1383Asn]	Dcr-2	658023	Dicer-2	658023 [Gene Symbol: Dcr-2] [Locus Tag: TcasGA2_TC001108] [Chromosome: LG2] [Map Location: ] [Description: Dicer-2] [Gene Type: protein-coding]	TcasGA2_TC001108; Dcr-2
176	NC_007417.3	11897588	SNV	G	A	Heterozygous	15	20	75	0.99	7	12	0.37	38.27	19	24	8	9	-1.92	0.95	1	no	A/G	No	1	21.8	XP_008201601.1:c.[725C>T]; XP_008201600.1:c.[725C>T]	XP_008201601.1:p.[Thr242Met]; XP_008201600.1:p.[Thr242Met]	LOC103315228	103315228		103315228 [Gene Symbol: LOC103315228] [Locus Tag: TcasGA2_TC032188] [Chromosome: LG2] [Map Location: ] [Description: zinc finger protein 532-like] [Gene Type: protein-coding]	TcasGA2_TC032188; LOC103315228
177	NC_007417.3	11911557..11911558	MNV	CA	GG	Homozygous	25	25	100	1	14	16	0.47	38.33	30	30	15	18		1	1	no	GG/GG	No	1	200	XP_001814259.1:c.840_841delTGinsCC	XP_001814259.1:p.Glu281Gln	LOC100141689	100141689		100141689 [Gene Symbol: LOC100141689] [Locus Tag: TcasGA2_TC000402] [Chromosome: LG2] [Map Location: ] [Description: ankyrin repeat, SAM and basic leucine zipper domain-containing protein 1] [Gene Type: protein-coding]	LOC100141689; TcasGA2_TC000402
178	NC_007417.3	11924968	SNV	T	A	Heterozygous	10	21	47.62	1	2	9	0.18	39.4	11	23	4	7	2.08	0.31	0.75	no	A/T	No	1	81.42	XP_015840541.1:c.[6076A>T]; XP_015840548.1:c.[5971A>T]; XP_015840547.1:c.[6076A>T]; XP_015840544.1:c.[6076A>T]; XP_015840545.1:c.[5971A>T]; XP_015840543.1:c.[6076A>T]; XP_015840549.1:c.[6076A>T]; XP_015840546.1:c.[6076A>T]; XP_015840542.1:c.[6076A>T]	XP_015840541.1:p.[Met2026Leu]; XP_015840548.1:p.[Met1991Leu]; XP_015840547.1:p.[Met2026Leu]; XP_015840544.1:p.[Met2026Leu]; XP_015840545.1:p.[Met1991Leu]; XP_015840543.1:p.[Met2026Leu]; XP_015840549.1:p.[Met2026Leu]; XP_015840546.1:p.[Met2026Leu]; XP_015840542.1:p.[Met2026Leu]	LOC662569	662569		662569 [Gene Symbol: LOC662569] [Locus Tag: TcasGA2_TC000401] [Chromosome: LG2] [Map Location: ] [Description: fat-like cadherin-related tumor suppressor homolog] [Gene Type: protein-coding]	LOC662569; FAT; cadherin; TcasGA2_TC000401
179	NC_007417.3	12009723	SNV	C	G	Homozygous	23	23	100	1	12	11	0.48	38.35	23	23	13	14		1	1	no	G/G	No	1	89.12	XP_008201654.1:c.489G>C	XP_008201654.1:p.Glu163Asp	LOC103315244	103315244		103315244 [Gene Symbol: LOC103315244] [Locus Tag: TcasGA2_TC000398] [Chromosome: LG2] [Map Location: ] [Description: uncharacterized LOC103315244] [Gene Type: protein-coding]	LOC103315244; TcasGA2_TC000398
180	NC_007417.3	12111081	SNV	C	T	Homozygous	21	21	100	1	13	10	0.43	37.57	23	23	12	15		1	1	no	T/T	No	1	84.71	XP_008201607.1:c.203G>A	XP_008201607.1:p.Arg68Lys	LOC662815	662815		662815 [Gene Symbol: LOC662815] [Locus Tag: TcasGA2_TC000395] [Chromosome: LG2] [Map Location: ] [Description: beta-1,4-glucuronyltransferase 1] [Gene Type: protein-coding]	TcasGA2_TC000395; LOC662815
181	NC_007417.3	12245740	SNV	T	C	Homozygous	34	34	100	1	21	21	0.5	37.44	42	42	22	27		1	1	no	C/C	No	1	122.24	XP_001814707.1:c.274A>G	XP_001814707.1:p.Thr92Ala	LOC100142510	100142510		100142510 [Gene Symbol: LOC100142510] [Locus Tag: TcasGA2_TC000380] [Chromosome: LG2] [Map Location: ] [Description: SET and MYND domain-containing protein 5] [Gene Type: protein-coding]	LOC100142510; TcasGA2_TC000380
182	NC_007417.3	12245812	SNV	T	C	Homozygous	22	22	100	1	10	13	0.43	35.91	23	23	12	16		1	1	no	C/C	No	1	86.13	XP_001814707.1:c.202A>G	XP_001814707.1:p.Thr68Ala	LOC100142510	100142510		100142510 [Gene Symbol: LOC100142510] [Locus Tag: TcasGA2_TC000380] [Chromosome: LG2] [Map Location: ] [Description: SET and MYND domain-containing protein 5] [Gene Type: protein-coding]	LOC100142510; TcasGA2_TC000380
183	NC_007417.3	12247523	Deletion	T	-	Homozygous	20	20	100	1	12	9	0.43	37.85	21	21	14	15		1	1	no	-/-	No	1	90.71	XP_001814757.1:c.1delA	XP_001814757.1:p.Met1?	LOC100142108	100142108		100142108 [Gene Symbol: LOC100142108] [Locus Tag: TcasGA2_TC000379] [Chromosome: LG2] [Map Location: ] [Description: transmembrane emp24 domain-containing protein eca] [Gene Type: protein-coding]	TcasGA2_TC000379; LOC100142108
184	NC_007417.3	12251363	SNV	T	C	Homozygous	24	24	100	1	15	12	0.44	38.29	27	27	16	16		1	1	no	C/C	No	1	92.15	XP_008201627.1:c.604A>G	XP_008201627.1:p.Thr202Ala	LOC663431	663431		663431 [Gene Symbol: LOC663431] [Locus Tag: TcasGA2_TC000376] [Chromosome: LG2] [Map Location: ] [Description: E3 ubiquitin-protein ligase RFWD2] [Gene Type: protein-coding]	LOC663431; TcasGA2_TC000376
185	NC_007417.3	12257751	SNV	A	G	Homozygous	22	22	100	1	12	12	0.5	37.86	24	24	12	14		1	1	no	G/G	No	1	86.11	XP_974637.1:c.1307T>C	XP_974637.1:p.Val436Ala	LOC663504	663504		663504 [Gene Symbol: LOC663504] [Locus Tag: TcasGA2_TC000375] [Chromosome: LG2] [Map Location: ] [Description: pre-mRNA-splicing factor Slu7] [Gene Type: protein-coding]	LOC663504; TcasGA2_TC000375
186	NC_007417.3	12281481	SNV	C	A	Homozygous	21	21	100	1	17	4	0.19	36.67	21	21	12	13		1	1	no	A/A	No	1	84.7	XP_015840877.1:c.[2107G>T]; XP_015840881.1:c.[1321G>T]; XP_015840878.1:c.[2107G>T]; XP_015840880.1:c.[2107G>T]; XP_015840879.1:c.[2107G>T]	XP_015840877.1:p.[Ala703Ser]; XP_015840881.1:p.[Ala441Ser]; XP_015840878.1:p.[Ala703Ser]; XP_015840880.1:p.[Ala703Ser]; XP_015840879.1:p.[Ala703Ser]	LOC103315239	103315239		103315239 [Gene Symbol: LOC103315239] [Locus Tag: TcasGA2_TC000368] [Chromosome: LG2] [Map Location: ] [Description: prominin-1-A] [Gene Type: protein-coding]	TcasGA2_TC000368; LOC103315239
187	NC_007417.3	12386498	SNV	T	C	Homozygous	21	21	100	1	13	8	0.38	38.24	21	21	7	17		1	1	no	C/C	No	1	83.13	NP_001280519.1:c.[958T>C]; XP_015839687.1:c.[958T>C]	NP_001280519.1:p.[Ser320Pro]; XP_015839687.1:p.[Ser320Pro]	LOC663905	663905	inhibitor of apoptosis 2	663905 [Gene Symbol: LOC663905] [Locus Tag: TcasGA2_TC001189] [Chromosome: LG2] [Map Location: ] [Description: inhibitor of apoptosis 2] [Gene Type: protein-coding]	Tiap2; LOC663905; TcasGA2_TC001189
188	NC_007417.3	12393906	SNV	G	T	Homozygous	22	22	100	1	7	22	0.24	38.64	29	29	10	12		1	1	no	T/T	No	1	87.71	XP_008201644.1:c.[768G>T]; XP_008201646.1:c.[747G>T]; XP_008201645.1:c.[747G>T]; XP_975061.1:c.[747G>T]	XP_008201644.1:p.[Gln256His]; XP_008201646.1:p.[Gln249His]; XP_008201645.1:p.[Gln249His]; XP_975061.1:p.[Gln249His]	LOC663941	663941		663941 [Gene Symbol: LOC663941] [Locus Tag: TcasGA2_TC001192] [Chromosome: LG2] [Map Location: ] [Description: inhibitor of apoptosis 1] [Gene Type: protein-coding]	TcasGA2_TC001192; LOC663941; Tiap1
189	NC_007417.3	12393908	SNV	G	A	Homozygous	22	22	100	1	7	22	0.24	39.23	29	29	10	12		1	1	no	A/A	No	1	87.71	XP_008201646.1:c.[749G>A]; XP_008201645.1:c.[749G>A]; XP_975061.1:c.[749G>A]; XP_008201644.1:c.[770G>A]	XP_008201646.1:p.[Gly250Asp]; XP_008201645.1:p.[Gly250Asp]; XP_975061.1:p.[Gly250Asp]; XP_008201644.1:p.[Gly257Asp]	LOC663941	663941		663941 [Gene Symbol: LOC663941] [Locus Tag: TcasGA2_TC001192] [Chromosome: LG2] [Map Location: ] [Description: inhibitor of apoptosis 1] [Gene Type: protein-coding]	TcasGA2_TC001192; LOC663941; Tiap1
190	NC_007417.3	12572180	SNV	G	T	Homozygous	24	24	100	1	11	18	0.38	37.79	29	29	14	15		1	1	no	T/T	No	1	93.73	XP_008201481.1:c.1031G>T	XP_008201481.1:p.Ser344Ile	LOC655180	655180		655180 [Gene Symbol: LOC655180] [Locus Tag: TcasGA2_TC001200] [Chromosome: LG2] [Map Location: ] [Description: TELO2-interacting protein 1 homolog] [Gene Type: protein-coding]	LOC655180; TcasGA2_TC001200
191	NC_007417.3	12572188	SNV	G	A	Homozygous	24	24	100	1	11	18	0.38	37.67	29	29	14	15		1	1	no	A/A	No	1	93.72	XP_008201481.1:c.1039G>A	XP_008201481.1:p.Val347Ile	LOC655180	655180		655180 [Gene Symbol: LOC655180] [Locus Tag: TcasGA2_TC001200] [Chromosome: LG2] [Map Location: ] [Description: TELO2-interacting protein 1 homolog] [Gene Type: protein-coding]	LOC655180; TcasGA2_TC001200
192	NC_007417.3	12965386	SNV	A	G	Heterozygous	10	22	45.45	1	8	6	0.43	35.9	14	26	4	6	-1.91	0.96	1	no	A/G	No	1	80	XP_968807.1:c.847A>G	XP_968807.1:p.Thr283Ala	LOC657245	657245		657245 [Gene Symbol: LOC657245] [Locus Tag: TcasGA2_TC001222] [Chromosome: LG2] [Map Location: ] [Description: corticotropin-releasing factor receptor 2] [Gene Type: protein-coding]	TcasGA2_TC001222; LOC657245
193	NC_007417.3	12965742	SNV	A	G	Heterozygous	7	20	35	1	4	3	0.43	40.14	7	20	3	3	1.55	0.56	0.99	no	A/G	No	1	47.28	XP_968807.1:c.1161A>G	XP_968807.1:p.Ile387Met	LOC657245	657245		657245 [Gene Symbol: LOC657245] [Locus Tag: TcasGA2_TC001222] [Chromosome: LG2] [Map Location: ] [Description: corticotropin-releasing factor receptor 2] [Gene Type: protein-coding]	TcasGA2_TC001222; LOC657245
194	NC_007417.3	12965840	SNV	G	A	Heterozygous	5	20	25	0.99	0	5	0	40.4	5	22	3	4	2.05	0.37	0.43	no	A/G	No	1	20.93	XP_968807.1:c.1214G>A	XP_968807.1:p.Arg405Lys	LOC657245	657245		657245 [Gene Symbol: LOC657245] [Locus Tag: TcasGA2_TC001222] [Chromosome: LG2] [Map Location: ] [Description: corticotropin-releasing factor receptor 2] [Gene Type: protein-coding]	TcasGA2_TC001222; LOC657245
195	NC_007417.3	12986531	SNV	C	A	Heterozygous	9	22	40.91	1	4	6	0.4	38.89	10	26	5	7	1.64	0.99	0.89	no	A/C	No	1	62.57	XP_969244.1:c.145G>T	XP_969244.1:p.Ala49Ser	LOC657708	657708		657708 [Gene Symbol: LOC657708] [Locus Tag: TcasGA2_TC000332] [Chromosome: LG2] [Map Location: ] [Description: potassium channel subfamily K member 6] [Gene Type: protein-coding]	LOC657708; TcasGA2_TC000332
196	NC_007417.3	13112207	SNV	A	G	Homozygous	21	21	100	1	10	17	0.37	36.71	27	27	11	15		1	1	no	G/G	No	1	83.1	XP_015840704.1:c.3395A>G	XP_015840704.1:p.Glu1132Gly	LOC659567	659567		659567 [Gene Symbol: LOC659567] [Locus Tag: TcasGA2_TC001238] [Chromosome: LG2] [Map Location: ] [Description: proto-oncogene tyrosine-protein kinase ROS] [Gene Type: protein-coding]	sev; TcasGA2_TC001238; sevenless; LOC659567
197	NC_007417.3	13112815	SNV	G	A	Homozygous	22	22	100	1	13	12	0.48	37.86	25	25	10	16		1	1	no	A/A	No	1	87.71	XP_015840704.1:c.4003G>A	XP_015840704.1:p.Asp1335Asn	LOC659567	659567		659567 [Gene Symbol: LOC659567] [Locus Tag: TcasGA2_TC001238] [Chromosome: LG2] [Map Location: ] [Description: proto-oncogene tyrosine-protein kinase ROS] [Gene Type: protein-coding]	sev; TcasGA2_TC001238; sevenless; LOC659567
198	NC_007417.3	13114480	SNV	T	C	Homozygous	29	29	100	1	17	15	0.47	37.38	32	32	14	18		1	1	no	C/C	No	1	107.2	XP_015840704.1:c.5623T>C	XP_015840704.1:p.*1875Arg	LOC659567	659567		659567 [Gene Symbol: LOC659567] [Locus Tag: TcasGA2_TC001238] [Chromosome: LG2] [Map Location: ] [Description: proto-oncogene tyrosine-protein kinase ROS] [Gene Type: protein-coding]	sev; TcasGA2_TC001238; sevenless; LOC659567
199	NC_007417.3	13114483	SNV	G	A	Homozygous	26	26	100	1	16	13	0.45	38.31	29	29	13	18		1	1	no	A/A	No	1	99.74	XP_015840704.1:c.5626G>A	XP_015840704.1:p.Val1876Ile	LOC659567	659567		659567 [Gene Symbol: LOC659567] [Locus Tag: TcasGA2_TC001238] [Chromosome: LG2] [Map Location: ] [Description: proto-oncogene tyrosine-protein kinase ROS] [Gene Type: protein-coding]	sev; TcasGA2_TC001238; sevenless; LOC659567
200	NC_007417.3	13117444	SNV	A	C	Homozygous	28	28	100	1	8	20	0.29	37.46	28	28	18	16		1	1	no	C/C	No	1	104.19	XP_015840704.1:c.6850A>C	XP_015840704.1:p.Lys2284Gln	LOC659567	659567		659567 [Gene Symbol: LOC659567] [Locus Tag: TcasGA2_TC001238] [Chromosome: LG2] [Map Location: ] [Description: proto-oncogene tyrosine-protein kinase ROS] [Gene Type: protein-coding]	sev; TcasGA2_TC001238; sevenless; LOC659567
201	NC_007417.3	13117724	SNV	T	G	Homozygous	21	21	100	1	5	16	0.24	38.05	21	21	12	14		1	1	no	G/G	No	1	83.1	XP_015840704.1:c.6979T>G	XP_015840704.1:p.Phe2327Val	LOC659567	659567		659567 [Gene Symbol: LOC659567] [Locus Tag: TcasGA2_TC001238] [Chromosome: LG2] [Map Location: ] [Description: proto-oncogene tyrosine-protein kinase ROS] [Gene Type: protein-coding]	sev; TcasGA2_TC001238; sevenless; LOC659567
202	NC_007417.3	13120070	SNV	C	G	Homozygous	23	23	100	1	14	9	0.39	36.87	23	23	9	16		1	1	no	G/G	No	1	89.12	XP_015840551.1:c.[1149C>G]; XP_015840552.1:c.[1149C>G]	XP_015840551.1:p.[Ile383Met]; XP_015840552.1:p.[Ile383Met]	LOC659632	659632		659632 [Gene Symbol: LOC659632] [Locus Tag: TcasGA2_TC001240] [Chromosome: LG2] [Map Location: ] [Description: E3 ubiquitin-protein ligase UHRF1] [Gene Type: protein-coding]	TcasGA2_TC001240; LOC659632
203	NC_007417.3	13199339	SNV	A	G	Heterozygous	8	21	38.1	1	2	6	0.25	38	8	25	3	3	-0.11	0.2	0.98	no	A/G	No	1	57.29	XP_015840017.1:c.1387A>G	XP_015840017.1:p.Ser463Gly	LOC103312164	103312164		103312164 [Gene Symbol: LOC103312164] [Locus Tag: TcasGA2_TC001246] [Chromosome: LG2] [Map Location: ] [Description: uncharacterized LOC103312164] [Gene Type: protein-coding]	LOC103312164; TcasGA2_TC001246
204	NC_007417.3	13207587	SNV	T	C	Heterozygous	9	23	39.13	1	8	2	0.2	36.22	10	24	4	8	-2.2	0.22	0.29	no	C/T	No	1	64.55	XP_008190269.1:c.1391A>G	XP_008190269.1:p.Asn464Ser	LOC660466	660466		660466 [Gene Symbol: LOC660466] [Locus Tag: ] [Chromosome: LG2] [Map Location: ] [Description: dnaJ homolog subfamily C member 10-like] [Gene Type: protein-coding]	LOC660466
205	NC_007417.3	13262971	SNV	G	C	Homozygous	21	21	100	1	6	17	0.26	38.81	23	23	11	13		1	1	no	C/C	No	1	83.12	XP_008190278.1:c.[3113C>G]; XP_008190279.1:c.[3110C>G]	XP_008190278.1:p.[Ala1038Gly]; XP_008190279.1:p.[Ala1037Gly]	LOC100141743	100141743		100141743 [Gene Symbol: LOC100141743] [Locus Tag: TcasGA2_TC000301] [Chromosome: LG2] [Map Location: ] [Description: DNA topoisomerase 2-binding protein 1] [Gene Type: protein-coding]	TcasGA2_TC000301; LOC100141743
206	NC_007417.3	13266510	SNV	C	T	Homozygous	24	24	100	1	8	19	0.3	39.04	27	27	15	17		1	1	no	T/T	No	1	93.73	XP_008190278.1:c.[805G>A]; XP_008190279.1:c.[802G>A]	XP_008190278.1:p.[Asp269Asn]; XP_008190279.1:p.[Asp268Asn]	LOC100141743	100141743		100141743 [Gene Symbol: LOC100141743] [Locus Tag: TcasGA2_TC000301] [Chromosome: LG2] [Map Location: ] [Description: DNA topoisomerase 2-binding protein 1] [Gene Type: protein-coding]	TcasGA2_TC000301; LOC100141743
207	NC_007417.3	13338843	SNV	C	G	Homozygous	20	20	100	1	13	12	0.48	37.9	25	25	11	16		1	1	no	G/G	No	1	80.09	XP_973098.1:c.295C>G	XP_973098.1:p.Pro99Ala	LOC661873	661873		661873 [Gene Symbol: LOC661873] [Locus Tag: TcasGA2_TC001263] [Chromosome: LG2] [Map Location: ] [Description: glycerophosphodiester phosphodiesterase 1] [Gene Type: protein-coding]	LOC661873; TcasGA2_TC001263
208	NC_007417.3	13390168	SNV	G	C	Homozygous	25	25	100	1	17	11	0.39	38.44	28	28	14	18		1	1	no	C/C	No	1	95.16	XP_008190285.1:c.[566C>G]; XP_015840711.1:c.[253+17565C>G]; XP_015840713.1:c.[196+17565C>G]; XP_008190286.1:c.[211+17565C>G]	XP_008190285.1:p.Thr189Ser	LOC661960, LOC103312156	661960 , 103312156		661960 [Gene Symbol: LOC661960] [Locus Tag: TcasGA2_TC000286] [Chromosome: LG2] [Map Location: ] [Description: Kv channel-interacting protein 1] [Gene Type: protein-coding] || 103312156 [Gene Symbol: LOC103312156] [Locus Tag: TcasGA2_TC000292] [Chromosome: LG2] [Map Location: ] [Description: hypothetical protein] [Gene Type: protein-coding]	LOC661960; TcasGA2_TC000286 || TcasGA2_TC000292; LOC103312156
209	NC_007417.3	13813079	SNV	C	T	Homozygous	19	21	90.48	0.99	18	7	0.28	38	25	27	13	13		0.98	1	no	T/T	No	1	21.4	XP_966624.1:c.913G>A	XP_966624.1:p.Glu305Lys	LOC655035	655035		655035 [Gene Symbol: LOC655035] [Locus Tag: TcasGA2_TC000267] [Chromosome: LG2] [Map Location: ] [Description: U3 small nucleolar RNA-associated protein 18 homolog] [Gene Type: protein-coding]	LOC655035; TcasGA2_TC000267
210	NC_007417.3	14029885	SNV	T	G	Heterozygous	8	20	40	1	3	5	0.38	36.25	8	24	4	7	-1.35	0.8	0.98	no	G/T	No	1	59.58	XP_967490.1:c.[730T>G]; XP_015840996.1:c.[829T>G]; XP_015840994.1:c.[844T>G]; XP_008190334.1:c.[841T>G]; XP_015840995.1:c.[841T>G]; XP_008190335.1:c.[730T>G]	XP_967490.1:p.[Ser244Ala]; XP_015840996.1:p.[Ser277Ala]; XP_015840994.1:p.[Ser282Ala]; XP_008190334.1:p.[Ser281Ala]; XP_015840995.1:p.[Ser281Ala]; XP_008190335.1:p.[Ser244Ala]	LOC655834	655834		655834 [Gene Symbol: LOC655834] [Locus Tag: TcasGA2_TC001293] [Chromosome: LG2] [Map Location: ] [Description: uncharacterized LOC655834] [Gene Type: protein-coding]	TcasGA2_TC001293; LOC655834
211	NC_007417.3	14195873	SNV	C	T	Homozygous	20	20	100	1	18	5	0.22	36.45	23	23	12	15		1	1	no	T/T	No	1	81.71	XP_968658.1:c.172G>A	XP_968658.1:p.Gly58Arg	LOC657085	657085		657085 [Gene Symbol: LOC657085] [Locus Tag: TcasGA2_TC000247] [Chromosome: LG2] [Map Location: ] [Description: serine protease H2] [Gene Type: protein-coding]	TcasGA2_TC000247; LOC657085; H2
212	NC_007417.3	14309935	SNV	A	G	Homozygous	23	23	100	1	9	17	0.35	37.43	26	26	12	12		1	1	no	G/G	No	1	89.12	XP_008190356.1:c.2125T>C	XP_008190356.1:p.Ser709Pro	LOC658024	658024		658024 [Gene Symbol: LOC658024] [Locus Tag: TcasGA2_TC000238] [Chromosome: LG2] [Map Location: ] [Description: fatty acid synthase] [Gene Type: protein-coding]	LOC658024; TcasGA2_TC000238
213	NC_007417.3	14777529	SNV	G	C	Homozygous	22	22	100	1	8	16	0.33	38.27	24	24	10	17		1	1	no	C/C	No	1	86.13	XP_972703.3:c.550C>G	XP_972703.3:p.Gln184Glu	LOC661455	661455		661455 [Gene Symbol: LOC661455] [Locus Tag: TcasGA2_TC000203] [Chromosome: LG2] [Map Location: ] [Description: venom acid phosphatase Acph-1] [Gene Type: protein-coding]	TcasGA2_TC000203; LOC661455
214	NC_007418.3	607870	SNV	C	G	Heterozygous	5	23	21.74	0.94	5	0	0	34.6	5	27	2	4	-1.57	0.05	0.29	no	C/G	No	1	12.49	XP_973652.1:c.705G>C	XP_973652.1:p.Gln235His	LOC662467	662467		662467 [Gene Symbol: LOC662467] [Locus Tag: TcasGA2_TC003180] [Chromosome: LG3] [Map Location: ] [Description: prostaglandin E synthase 2] [Gene Type: protein-coding]	LOC662467; TcasGA2_TC003180
215	NC_007418.3	718868	SNV	A	G	Heterozygous	11	21	52.38	1	4	7	0.36	38.55	11	21	5	8	2.68	0.4	0.83	no	A/G	No	1	81.68	XP_974169.1:c.178A>G	XP_974169.1:p.Ile60Val	LOC663144, LOC663011	663144 , 663011		663144 [Gene Symbol: LOC663144] [Locus Tag: TcasGA2_TC003170] [Chromosome: LG3] [Map Location: ] [Description: absent MD neurons and olfactory sensilla] [Gene Type: protein-coding] || 663011 [Gene Symbol: LOC663011] [Locus Tag: TcasGA2_TC003282] [Chromosome: LG3] [Map Location: ] [Description: tyramine beta hydroxylase] [Gene Type: protein-coding]	Amos; Tath1; TcasGA2_TC003170; LOC663144 || TcTBH; LOC663011; TcasGA2_TC003282
216	NC_007418.3	1005401	SNV	A	G	Heterozygous	16	36	44.44	1	8	8	0.5	36.19	16	36	9	14	-0.1	0.47	0.46	no	A/G	No	1	117.41	XP_008190598.1:c.517A>G	XP_008190598.1:p.Met173Val	LOC663465	663465		663465 [Gene Symbol: LOC663465] [Locus Tag: TcasGA2_TC003303] [Chromosome: LG3] [Map Location: ] [Description: cytochrome c oxidase subunit 6B2] [Gene Type: protein-coding]	LOC663465; TcasGA2_TC003303
217	NC_007418.3	1239552	SNV	T	A	Homozygous	24	24	100	1	16	11	0.41	37.54	27	27	13	19		1	1	no	A/A	No	1	93.72	XP_975769.1:c.721T>A	XP_975769.1:p.Ser241Thr	LOC656817	656817		656817 [Gene Symbol: LOC656817] [Locus Tag: TcasGA2_TC003323] [Chromosome: LG3] [Map Location: ] [Description: cytochrome b-c1 complex subunit 2, mitochondrial] [Gene Type: protein-coding]	LOC656817; TcasGA2_TC003323
218	NC_007418.3	1257258	SNV	G	A	Heterozygous	5	21	23.81	0.98	1	5	0.17	36	6	23	2	2	-2.02	0.12	0.23	no	A/G	No	1	18.12	XP_015833126.1:c.[4400C>T]; XP_015833125.1:c.[4400C>T]; XP_015833124.1:c.[4400C>T]; XP_015833123.1:c.[4400C>T]	XP_015833126.1:p.[Ala1467Val]; XP_015833125.1:p.[Ala1467Val]; XP_015833124.1:p.[Ala1467Val]; XP_015833123.1:p.[Ala1467Val]	LOC103312261	103312261		103312261 [Gene Symbol: LOC103312261] [Locus Tag: TcasGA2_TC003135] [Chromosome: LG3] [Map Location: LG3|LG3] [Description: uncharacterized LOC103312261] [Gene Type: protein-coding]	TcasGA2_TC003135; LOC103312261
219	NC_007418.3	1364665	SNV	A	G	Homozygous	24	24	100	1	19	11	0.37	38.79	30	30	14	18		1	1	no	G/G	No	1	92.13	XP_008190660.1:c.404T>C	XP_008190660.1:p.Leu135Pro	LOC658025	658025		658025 [Gene Symbol: LOC658025] [Locus Tag: TcasGA2_TC003128] [Chromosome: LG3] [Map Location: ] [Description: serine/threonine-protein kinase SMG1] [Gene Type: protein-coding]	LOC658025; TcasGA2_TC003128
220	NC_007418.3	1478820	SNV	G	A	Heterozygous	18	26	69.23	1	7	15	0.32	37.5	22	34	8	8	1.75	0.92	1	no	A/G	No	1	43.34	XP_970955.1:c.260C>T	XP_970955.1:p.Thr87Ile	LOC659707, LOC659570	659707 , 659570		659707 [Gene Symbol: LOC659707] [Locus Tag: TcasGA2_TC003341] [Chromosome: LG3] [Map Location: ] [Description: tyrosine-protein phosphatase Lar] [Gene Type: protein-coding] || 659570 [Gene Symbol: LOC659570] [Locus Tag: TcasGA2_TC003109] [Chromosome: LG3] [Map Location: ] [Description: cuticle protein 7] [Gene Type: protein-coding]	LOC659707; TcasGA2_TC003341 || LOC659570; TcasGA2_TC003109
221	NC_007418.3	2016979	SNV	G	T	Homozygous	20	20	100	1	9	14	0.39	37.8	23	23	11	16		1	1	no	T/T	No	1	81.7	XP_972111.1:c.2490G>T	XP_972111.1:p.Met830Ile	LOC660815	660815		660815 [Gene Symbol: LOC660815] [Locus Tag: TcasGA2_TC003352] [Chromosome: LG3] [Map Location: ] [Description: tyrosine-protein kinase-like otk] [Gene Type: protein-coding]	TcasGA2_TC003352; LOC660815
222	NC_007418.3	2410631	SNV	A	C	Heterozygous	15	22	68.18	1	10	8	0.44	37.2	18	25	8	12	-0.88	0.83	0.87	no	A/C	No	1	37.05	XP_015833150.1:c.[3748A>C]; XP_015833152.1:c.[3586A>C]; XP_015833149.1:c.[3748A>C]; XP_008190700.1:c.[3745A>C]	XP_015833150.1:p.[Met1250Leu]; XP_015833152.1:p.[Met1196Leu]; XP_015833149.1:p.[Met1250Leu]; XP_008190700.1:p.[Met1249Leu]	LOC661200	661200		661200 [Gene Symbol: LOC661200] [Locus Tag: TcasGA2_TC003360] [Chromosome: LG3] [Map Location: ] [Description: nephrin] [Gene Type: protein-coding]	TcasGA2_TC003360; LOC661200
223	NC_007418.3	2447601	SNV	C	T	Heterozygous	7	26	26.92	1	7	0	0	36.57	7	30	3	5	-0.58	0.08	0.23	no	C/T	No	1	29.55	NP_001182329.1:c.[298C>T]; XP_008190751.1:c.[298C>T]; XP_015833051.1:c.[298C>T]	NP_001182329.1:p.[Pro100Ser]; XP_008190751.1:p.[Pro100Ser]; XP_015833051.1:p.[Pro100Ser]	LOC100141989	100141989	resilin	100141989 [Gene Symbol: LOC100141989] [Locus Tag: TcasGA2_TC003362] [Chromosome: LG3] [Map Location: ] [Description: resilin] [Gene Type: protein-coding]	LOC100141989; TcasGA2_TC003362
224	NC_007418.3	2672603	SNV	C	T	Heterozygous	7	20	35	1	5	2	0.29	36.57	7	23	4	4	-0.79	0.34	0.79	no	C/T	No	1	46.19	XP_015833206.1:c.[133G>A]; XP_015833207.1:c.[25G>A]; XP_015833208.1:c.[25G>A]; XP_008190761.1:c.[25G>A]	XP_015833206.1:p.[Ala45Thr]; XP_015833207.1:p.[Ala9Thr]; XP_015833208.1:p.[Ala9Thr]; XP_008190761.1:p.[Ala9Thr]	LOC655749	655749		655749 [Gene Symbol: LOC655749] [Locus Tag: TcasGA2_TC003075] [Chromosome: LG3] [Map Location: ] [Description: cyclic nucleotide-gated cation channel subunit A] [Gene Type: protein-coding]	LOC655749; TcasGA2_TC003075
225	NC_007418.3	2816172..2816173	MNV	CA	TG	Heterozygous	17	22	77.27	1	7	11	0.39	39.71	18	25	10	14	2.39	0.63	1	no	complex	No	1	200	XP_015833187.1:c.[267_268delTGinsCA]; XP_008190779.1:c.[633_634delTGinsCA]	XP_015833187.1:p.[Asp90Asn]; XP_008190779.1:p.[Asp212Asn]	LOC103312285	103312285		103312285 [Gene Symbol: LOC103312285] [Locus Tag: TcasGA2_TC003066] [Chromosome: LG3] [Map Location: ] [Description: hypothetical protein] [Gene Type: protein-coding]	LOC103312285; TcasGA2_TC003066
226	NC_007418.3	3456464	SNV	A	G	Homozygous	23	23	100	1	18	13	0.42	37.96	31	31	15	17		1	1	no	G/G	No	1	89.12	XP_015833184.1:c.[1393A>G]; XP_968570.1:c.[2101A>G]	XP_015833184.1:p.[Asn465Asp]; XP_968570.1:p.[Asn701Asp]	LOC656984	656984		656984 [Gene Symbol: LOC656984] [Locus Tag: TcasGA2_TC001556] [Chromosome: LG3] [Map Location: ] [Description: peroxidasin] [Gene Type: protein-coding]	Pxn; LOC656984; TcasGA2_TC001556
227	NC_007418.3	3785574	SNV	T	C	Homozygous	21	21	100	1	15	7	0.32	38.1	22	22	16	16		1	1	no	C/C	No	1	83.12	XP_008200301.1:c.119T>C	XP_008200301.1:p.Val40Ala	LOC103314889	103314889		103314889 [Gene Symbol: LOC103314889] [Locus Tag: TcasGA2_TC034581] [Chromosome: LG3] [Map Location: LG3|LGX] [Description: uncharacterized LOC103314889] [Gene Type: protein-coding]	TcasGA2_TC034581; LOC103314889
228	NC_007418.3	3796193	SNV	C	T	Heterozygous	16	20	80	0.89	16	4	0.2	39.25	20	24	10	8	-1.89	0.97	0.99	no	C/T	No	1	9.66	XP_971192.1:c.562G>A	XP_971192.1:p.Val188Ile	LOC659827	659827		659827 [Gene Symbol: LOC659827] [Locus Tag: TcasGA2_TC011515] [Chromosome: LG3] [Map Location: ] [Description: DNA polymerase eta] [Gene Type: protein-coding]	TcasGA2_TC011515; LOC659827
229	NC_007418.3	3856109	SNV	A	G	Homozygous	21	21	100	1	10	15	0.4	36.76	25	25	10	15		1	1	no	G/G	No	1	83.1	XP_015833077.1:c.[1669A>G]; XP_008200294.1:c.[1669A>G]	XP_015833077.1:p.[Asn557Asp]; XP_008200294.1:p.[Asn557Asp]	LOC100142377	100142377		100142377 [Gene Symbol: LOC100142377] [Locus Tag: TcasGA2_TC011553] [Chromosome: LG3] [Map Location: ] [Description: myosin 1B] [Gene Type: protein-coding]	Myo1B; LOC100142377; TcasGA2_TC011553
230	NC_007418.3	3866859	SNV	C	G	Heterozygous	11	23	47.83	1	11	0	0	36.36	11	24	4	11	-3.29	0.12	0.34	no	C/G	No	1	88.61	XP_008200296.1:c.1323G>C	XP_008200296.1:p.Gln441His	LOC660207	660207		660207 [Gene Symbol: LOC660207] [Locus Tag: TcasGA2_TC011508] [Chromosome: LG3] [Map Location: ] [Description: contactin-associated protein-like 3] [Gene Type: protein-coding]	TcasGA2_TC011508; LOC660207
231	NC_007418.3	4033555	SNV	G	C	Homozygous	29	29	100	1	17	13	0.43	37.14	30	30	16	18		1	1	no	C/C	No	1	107.2	XP_971269.1:c.311G>C	XP_971269.1:p.Ser104Thr	LOC659910	659910		659910 [Gene Symbol: LOC659910] [Locus Tag: TcasGA2_TC003033] [Chromosome: LG3] [Map Location: ] [Description: mitochondrial inner membrane protease ATP23 homolog] [Gene Type: protein-coding]	TcasGA2_TC003033; LOC659910
232	NC_007418.3	4142599	SNV	A	T	Homozygous	20	20	100	1	9	14	0.39	36.1	23	23	9	15		1	1	no	T/T	No	1	81.7	XP_969027.1:c.799T>A	XP_969027.1:p.Ser267Thr	LOC657476	657476		657476 [Gene Symbol: LOC657476] [Locus Tag: TcasGA2_TC003377] [Chromosome: LG3] [Map Location: ] [Description: uncharacterized LOC657476] [Gene Type: protein-coding]	LOC657476; TcasGA2_TC003377
233	NC_007418.3	4797072..4797073	MNV	CG	TT	Homozygous	21	21	100	1	12	15	0.44	37.57	27	27	17	17		1	1	no	TT/TT	No	1	200	XP_015833340.1:c.[3144_3145delCGinsAA]; XP_008190866.1:c.[3144_3145delCGinsAA]	XP_015833340.1:p.[Asp1048_Glu1049delinsGluLys]; XP_008190866.1:p.[Asp1048_Glu1049delinsGluLys]	LOC103312310	103312310		103312310 [Gene Symbol: LOC103312310] [Locus Tag: TcasGA2_TC003005] [Chromosome: LG3] [Map Location: ] [Description: muscle M-line assembly protein unc-89] [Gene Type: protein-coding]	LOC103312310; TcasGA2_TC003005
234	NC_007418.3	4798244..4798245	MNV	GG	CT	Homozygous	20	20	100	1	14	10	0.42	36.58	24	24	13	14		1	1	no	CT/CT	No	1	200	XP_008190866.1:c.[1972_1973delCCinsAG]; XP_015833340.1:c.[1972_1973delCCinsAG]	XP_008190866.1:p.[Pro658Ser]; XP_015833340.1:p.[Pro658Ser]	LOC103312310	103312310		103312310 [Gene Symbol: LOC103312310] [Locus Tag: TcasGA2_TC003005] [Chromosome: LG3] [Map Location: ] [Description: muscle M-line assembly protein unc-89] [Gene Type: protein-coding]	LOC103312310; TcasGA2_TC003005
235	NC_007418.3	4798287..4798288	MNV	GT	CG	Homozygous	20	20	100	1	6	17	0.26	39.1	23	23	13	17		1	1	no	CG/CG	No	1	200	XP_015833340.1:c.[1929_1930delACinsCG]; XP_008190866.1:c.[1929_1930delACinsCG]	XP_015833340.1:p.[Lys643_Pro644delinsAsnAla]; XP_008190866.1:p.[Lys643_Pro644delinsAsnAla]	LOC103312310	103312310		103312310 [Gene Symbol: LOC103312310] [Locus Tag: TcasGA2_TC003005] [Chromosome: LG3] [Map Location: ] [Description: muscle M-line assembly protein unc-89] [Gene Type: protein-coding]	LOC103312310; TcasGA2_TC003005
236	NC_007418.3	5001239	SNV	G	T	Homozygous	21	21	100	1	15	9	0.38	37.62	24	24	12	13		1	1	no	T/T	No	1	84.7	XP_970038.1:c.1875C>A	XP_970038.1:p.Asp625Glu	LOC658568	658568		658568 [Gene Symbol: LOC658568] [Locus Tag: TcasGA2_TC003001] [Chromosome: LG3] [Map Location: ] [Description: WD repeat-containing protein 3] [Gene Type: protein-coding]	TcasGA2_TC003001; LOC658568
237	NC_007418.3	5013802	SNV	T	C	Homozygous	22	22	100	1	12	13	0.48	37.82	25	25	12	16		1	1	no	C/C	No	1	86.13	XP_015833512.1:c.788A>G	XP_015833512.1:p.Lys263Arg	LOC658653	658653		658653 [Gene Symbol: LOC658653] [Locus Tag: TcasGA2_TC003000] [Chromosome: LG3] [Map Location: ] [Description: cubitus interruptus] [Gene Type: protein-coding]	LOC658653; Ci; TcasGA2_TC003000
238	NC_007418.3	5150717	SNV	A	G	Homozygous	22	22	100	1	15	10	0.4	38.18	25	25	13	15		1	1	no	G/G	No	1	86.11	XP_970503.2:c.364A>G	XP_970503.2:p.Ile122Val	LOC659078	659078		659078 [Gene Symbol: LOC659078] [Locus Tag: TcasGA2_TC003434] [Chromosome: LG3] [Map Location: ] [Description: major facilitator superfamily domain-containing protein 6] [Gene Type: protein-coding]	LOC659078; TcasGA2_TC003434
239	NC_007418.3	5426190	SNV	G	C	Homozygous	21	21	100	1	14	9	0.39	38.95	23	23	11	13		1	1	no	C/C	No	1	83.12	XP_972914.1:c.[186G>C]; XP_015833325.1:c.[186G>C]; XP_008190904.1:c.[186G>C]	XP_972914.1:p.[Glu62Asp]; XP_015833325.1:p.[Glu62Asp]; XP_008190904.1:p.[Glu62Asp]	LOC661672	661672		661672 [Gene Symbol: LOC661672] [Locus Tag: TcasGA2_TC003462] [Chromosome: LG3] [Map Location: ] [Description: THUMP domain-containing protein 1 homolog] [Gene Type: protein-coding]	LOC661672; TcasGA2_TC003462
240	NC_007418.3	5426393	SNV	G	A	Homozygous	22	22	100	1	11	14	0.44	38.86	25	25	13	17		1	1	no	A/A	No	1	87.71	XP_972914.1:c.[389G>A]; XP_008190904.1:c.[389G>A]; XP_015833325.1:c.[389G>A]	XP_972914.1:p.[Arg130Lys]; XP_008190904.1:p.[Arg130Lys]; XP_015833325.1:p.[Arg130Lys]	LOC661672	661672		661672 [Gene Symbol: LOC661672] [Locus Tag: TcasGA2_TC003462] [Chromosome: LG3] [Map Location: ] [Description: THUMP domain-containing protein 1 homolog] [Gene Type: protein-coding]	LOC661672; TcasGA2_TC003462
241	NC_007418.3	5426471	SNV	T	G	Homozygous	21	21	100	1	4	17	0.19	37.33	21	21	12	15		1	1	no	G/G	No	1	83.1	XP_008190904.1:c.[467T>G]; XP_015833325.1:c.[467T>G]; XP_972914.1:c.[467T>G]	XP_008190904.1:p.[Val156Gly]; XP_015833325.1:p.[Val156Gly]; XP_972914.1:p.[Val156Gly]	LOC661672	661672		661672 [Gene Symbol: LOC661672] [Locus Tag: TcasGA2_TC003462] [Chromosome: LG3] [Map Location: ] [Description: THUMP domain-containing protein 1 homolog] [Gene Type: protein-coding]	LOC661672; TcasGA2_TC003462
242	NC_007418.3	5435539	SNV	C	G	Homozygous	21	21	100	1	15	7	0.32	38.95	22	22	15	14		1	1	no	G/G	No	1	83.1	XP_008190905.1:c.2287G>C	XP_008190905.1:p.Ala763Pro	LOC661754	661754		661754 [Gene Symbol: LOC661754] [Locus Tag: TcasGA2_TC002977] [Chromosome: LG3] [Map Location: ] [Description: BAI1-associated protein 3] [Gene Type: protein-coding]	TcasGA2_TC002977; LOC661754
243	NC_007418.3	5718125	SNV	A	T	Homozygous	20	20	100	1	15	7	0.32	37.35	22	22	9	14		1	1	no	T/T	No	1	81.69	XP_015833269.1:c.[32741T>A]; XP_015833268.1:c.[32804T>A]; XP_015833270.1:c.[32804T>A]	XP_015833269.1:p.[Leu10914His]; XP_015833268.1:p.[Leu10935His]; XP_015833270.1:p.[Leu10935His]	LOC662729	662729		662729 [Gene Symbol: LOC662729] [Locus Tag: TcasGA2_TC002962] [Chromosome: LG3] [Map Location: ] [Description: titin] [Gene Type: protein-coding]	LOC662729; TcasGA2_TC002962
244	NC_007418.3	5749024	SNV	C	T	Homozygous	24	24	100	1	11	17	0.39	39.42	28	28	14	17		1	1	no	T/T	No	1	93.72	XP_015833270.1:c.[16114G>A]; XP_015833268.1:c.[16114G>A]; XP_015833269.1:c.[16051G>A]	XP_015833270.1:p.[Asp5372Asn]; XP_015833268.1:p.[Asp5372Asn]; XP_015833269.1:p.[Asp5351Asn]	LOC662729	662729		662729 [Gene Symbol: LOC662729] [Locus Tag: TcasGA2_TC002962] [Chromosome: LG3] [Map Location: ] [Description: titin] [Gene Type: protein-coding]	LOC662729; TcasGA2_TC002962
245	NC_007418.3	5749366	SNV	T	C	Homozygous	20	20	100	1	12	11	0.48	38	23	23	15	15		1	1	no	C/C	No	1	80.12	XP_015833270.1:c.[15772A>G]; XP_015833268.1:c.[15772A>G]; XP_015833269.1:c.[15709A>G]	XP_015833270.1:p.[Lys5258Glu]; XP_015833268.1:p.[Lys5258Glu]; XP_015833269.1:p.[Lys5237Glu]	LOC662729	662729		662729 [Gene Symbol: LOC662729] [Locus Tag: TcasGA2_TC002962] [Chromosome: LG3] [Map Location: ] [Description: titin] [Gene Type: protein-coding]	LOC662729; TcasGA2_TC002962
246	NC_007418.3	5756521	SNV	T	C	Homozygous	20	20	100	1	11	9	0.45	37.85	20	20	11	15		1	1	no	C/C	No	1	80.12	XP_015833270.1:c.[8617A>G]; XP_015833268.1:c.[8617A>G]; XP_015833269.1:c.[8554A>G]	XP_015833270.1:p.[Lys2873Glu]; XP_015833268.1:p.[Lys2873Glu]; XP_015833269.1:p.[Lys2852Glu]	LOC662729	662729		662729 [Gene Symbol: LOC662729] [Locus Tag: TcasGA2_TC002962] [Chromosome: LG3] [Map Location: ] [Description: titin] [Gene Type: protein-coding]	LOC662729; TcasGA2_TC002962
247	NC_007418.3	5789031	SNV	A	T	Homozygous	20	20	100	1	16	10	0.38	38.95	26	26	11	13		1	1	no	T/T	No	1	81.7	XP_974036.1:c.[3116T>A]; XP_015833277.1:c.[3116T>A]	XP_974036.1:p.[Leu1039Gln]; XP_015833277.1:p.[Leu1039Gln]	LOC662868	662868		662868 [Gene Symbol: LOC662868] [Locus Tag: TcasGA2_TC002959] [Chromosome: LG3] [Map Location: ] [Description: hamartin] [Gene Type: protein-coding]	LOC662868; TcasGA2_TC002959
248	NC_007418.3	5791012	SNV	A	T	Homozygous	21	21	100	1	11	15	0.42	36	26	26	12	12		1	1	no	T/T	No	1	84.71	XP_974036.1:c.[1420T>A]; XP_015833277.1:c.[1420T>A]	XP_974036.1:p.[Cys474Ser]; XP_015833277.1:p.[Cys474Ser]	LOC662868	662868		662868 [Gene Symbol: LOC662868] [Locus Tag: TcasGA2_TC002959] [Chromosome: LG3] [Map Location: ] [Description: hamartin] [Gene Type: protein-coding]	LOC662868; TcasGA2_TC002959
249	NC_007418.3	5977777	SNV	C	G	Homozygous	20	20	100	1	13	7	0.35	36.35	20	20	8	10		1	1	no	G/G	No	1	80.09	XP_974693.1:c.348G>C	XP_974693.1:p.Lys116Asn	LOC663561	663561		663561 [Gene Symbol: LOC663561] [Locus Tag: TcasGA2_TC002942] [Chromosome: LG3] [Map Location: ] [Description: zinc transporter ZIP1] [Gene Type: protein-coding]	TcasGA2_TC002942; LOC663561
250	NC_007418.3	6634184	SNV	C	A	Homozygous	21	21	100	1	11	13	0.46	37.1	24	24	13	17		1	1	no	A/A	No	1	84.7	XP_015833347.1:c.6875C>A	XP_015833347.1:p.Thr2292Asn	LOC664216	664216		664216 [Gene Symbol: LOC664216] [Locus Tag: TcasGA2_TC003537] [Chromosome: LG3] [Map Location: ] [Description: uncharacterized LOC664216] [Gene Type: protein-coding]	TcasGA2_TC003537; LOC664216
251	NC_007418.3	6642406^6642407	Insertion	-	A	Homozygous	20	20	100	1	16	7	0.3	37.15	23	23	14	10		1	1	no	A/A	No	1	81.69	XP_015833347.1:c.8355_8356insA	XP_015833347.1:p.Asn2786fs	LOC664216	664216		664216 [Gene Symbol: LOC664216] [Locus Tag: TcasGA2_TC003537] [Chromosome: LG3] [Map Location: ] [Description: uncharacterized LOC664216] [Gene Type: protein-coding]	TcasGA2_TC003537; LOC664216
252	NC_007418.3	6758724	SNV	T	C	Homozygous	24	24	100	1	8	16	0.33	37.5	24	24	11	20		1	1	no	C/C	No	1	92.15	XP_008191009.1:c.2894A>G	XP_008191009.1:p.Lys965Arg	LOC664250	664250		664250 [Gene Symbol: LOC664250] [Locus Tag: TcasGA2_TC002906] [Chromosome: LG3] [Map Location: ] [Description: uncharacterized LOC664250] [Gene Type: protein-coding]	LOC664250; TcasGA2_TC002906
253	NC_007418.3	6823279	SNV	C	T	Homozygous	40	40	100	1	37	7	0.16	39.05	44	44	19	21		1	1	no	T/T	No	1	141.84	XP_008191016.1:c.382G>A	XP_008191016.1:p.Val128Met	LOC103312349	103312349		103312349 [Gene Symbol: LOC103312349] [Locus Tag: TcasGA2_TC002904] [Chromosome: LG3] [Map Location: ] [Description: putative inositol monophosphatase 3] [Gene Type: protein-coding]	TcasGA2_TC002904; LOC103312349
254	NC_007418.3	6831210^6831211	Insertion	-	ACG	Homozygous	29	29	100	1	14	16	0.47	36.68	30	30	17	19		1	1	no	ACG/ACG	No	1	200	XP_975371.1:c.526_527insACG	XP_975371.1:p.Asn176_Glu177insAsp	LOC664269	664269		664269 [Gene Symbol: LOC664269] [Locus Tag: TcasGA2_TC003540] [Chromosome: LG3] [Map Location: ] [Description: glycogen-binding subunit 76A] [Gene Type: protein-coding]	TcasGA2_TC003540; LOC664269
255	NC_007418.3	7043504	SNV	A	G	Homozygous	23	23	100	1	8	18	0.31	37.39	26	26	11	15		1	1	no	G/G	No	1	89.12	XP_975437.1:c.289T>C	XP_975437.1:p.Ser97Pro	LOC664335	664335		664335 [Gene Symbol: LOC664335] [Locus Tag: TcasGA2_TC002894] [Chromosome: LG3] [Map Location: ] [Description: probable serine hydrolase] [Gene Type: protein-coding]	LOC664335; TcasGA2_TC002894
256	NC_007418.3	7129598	SNV	G	A	Homozygous	26	26	100	1	18	8	0.31	38.81	26	26	10	20		1	1	no	A/A	No	1	99.74	XP_975456.1:c.[55C>T]; XP_008191036.1:c.[502-8841G>A]; XP_008191037.1:c.[502-8841G>A]	XP_975456.1:p.Pro19Ser	LOC664359, LOC664352	664359 , 664352		664359 [Gene Symbol: LOC664359] [Locus Tag: TcasGA2_TC003550] [Chromosome: LG3] [Map Location: ] [Description: sestrin homolog] [Gene Type: protein-coding] || 664352 [Gene Symbol: LOC664352] [Locus Tag: TcasGA2_TC002890] [Chromosome: LG3] [Map Location: ] [Description: uncharacterized LOC664352] [Gene Type: protein-coding]	LOC664359; TcasGA2_TC003550 || TcasGA2_TC002890; LOC664352
257	NC_007418.3	7525934	SNV	G	A	Homozygous	20	20	100	1	5	15	0.25	35.8	20	20	11	12		1	1	no	A/A	No	1	81.69	XP_967064.1:c.6677C>T	XP_967064.1:p.Thr2226Ile	LOC655426	655426		655426 [Gene Symbol: LOC655426] [Locus Tag: TcasGA2_TC002881] [Chromosome: LG3] [Map Location: ] [Description: E3 SUMO-protein ligase RanBP2] [Gene Type: protein-coding]	TcasGA2_TC002881; LOC655426
258	NC_007418.3	7530076	SNV	T	G	Homozygous	26	26	100	1	15	22	0.41	37.23	37	37	14	18		1	1	no	G/G	No	1	98.15	XP_967064.1:c.3680A>C	XP_967064.1:p.Asn1227Thr	LOC655426	655426		655426 [Gene Symbol: LOC655426] [Locus Tag: TcasGA2_TC002881] [Chromosome: LG3] [Map Location: ] [Description: E3 SUMO-protein ligase RanBP2] [Gene Type: protein-coding]	TcasGA2_TC002881; LOC655426
259	NC_007418.3	7532876	SNV	G	A	Homozygous	26	26	100	1	12	16	0.43	38.38	28	28	16	16		1	1	no	A/A	No	1	99.74	XP_967064.1:c.880C>T	XP_967064.1:p.His294Tyr	LOC655426	655426		655426 [Gene Symbol: LOC655426] [Locus Tag: TcasGA2_TC002881] [Chromosome: LG3] [Map Location: ] [Description: E3 SUMO-protein ligase RanBP2] [Gene Type: protein-coding]	TcasGA2_TC002881; LOC655426
260	NC_007418.3	7596827	SNV	T	C	Homozygous	20	20	100	1	8	12	0.4	38.6	20	20	13	17		1	1	no	C/C	No	1	80.12	XP_967495.1:c.5863A>G	XP_967495.1:p.Thr1955Ala	LOC655839	655839		655839 [Gene Symbol: LOC655839] [Locus Tag: TcasGA2_TC002876] [Chromosome: LG3] [Map Location: ] [Description: HEAT repeat-containing protein 1 homolog] [Gene Type: protein-coding]	TcasGA2_TC002876; LOC655839
261	NC_007418.3	7611133	SNV	G	C	Homozygous	25	25	100	1	10	20	0.33	39.08	30	30	12	14		1	1	no	C/C	No	1	95.16	XP_008191066.1:c.[2175C>G]; XP_008191067.1:c.[1279+2296G>C]	XP_008191066.1:p.Ser725Arg	LOC103312366, LOC656169	103312366 , 656169		103312366 [Gene Symbol: LOC103312366] [Locus Tag: TcasGA2_TC003567] [Chromosome: LG3] [Map Location: ] [Description: maternal embryonic leucine zipper kinase] [Gene Type: protein-coding] || 656169 [Gene Symbol: LOC656169] [Locus Tag: TcasGA2_TC002875] [Chromosome: LG3] [Map Location: ] [Description: elongation factor Tu GTP-binding domain-containing protein 1] [Gene Type: protein-coding]	TcasGA2_TC003567; LOC103312366 || LOC656169; TcasGA2_TC002875
262	NC_007418.3	8042509	SNV	G	C	Homozygous	20	20	100	1	10	13	0.43	39.5	23	23	13	12		1	1	no	C/C	No	1	80.11	XP_015833523.1:c.214C>G	XP_015833523.1:p.Arg72Gly	LOC657250	657250		657250 [Gene Symbol: LOC657250] [Locus Tag: TcasGA2_TC002858] [Chromosome: LG3] [Map Location: LG3|LG3] [Description: neutral alpha-glucosidase AB] [Gene Type: protein-coding]	LOC657250; TcasGA2_TC002858
263	NC_007418.3	8045386	SNV	C	T	Homozygous	21	21	100	1	8	13	0.38	37.81	21	21	9	12		1	1	no	T/T	No	1	84.7	XP_968957.1:c.731G>A	XP_968957.1:p.Arg244Lys	LOC657402	657402		657402 [Gene Symbol: LOC657402] [Locus Tag: TcasGA2_TC002857] [Chromosome: LG3] [Map Location: ] [Description: aspartate--tRNA ligase, cytoplasmic] [Gene Type: protein-coding]	LOC657402; TcasGA2_TC002857
264	NC_007418.3	8154624	SNV	C	T	Homozygous	26	26	100	1	6	21	0.22	38.12	27	27	18	15		1	1	no	T/T	No	1	99.74	XP_008191810.1:c.[1196C>T]; XP_008191799.1:c.[1319C>T]; XP_008191804.1:c.[1196C>T]	XP_008191810.1:p.[Ala399Val]; XP_008191799.1:p.[Ala440Val]; XP_008191804.1:p.[Ala399Val]	LOC103312586	103312586		103312586 [Gene Symbol: LOC103312586] [Locus Tag: TcasGA2_TC003588] [Chromosome: LG3] [Map Location: ] [Description: hypothetical protein] [Gene Type: protein-coding]	LOC103312586; TcasGA2_TC003588
265	NC_007418.3	8154640	SNV	A	G	Homozygous	23	23	100	1	7	16	0.3	38.48	23	23	15	14		1	1	no	G/G	No	1	89.12	XP_008191804.1:c.[1212A>G]; XP_008191810.1:c.[1212A>G]; XP_008191799.1:c.[1335A>G]	XP_008191804.1:p.[Ile404Met]; XP_008191810.1:p.[Ile404Met]; XP_008191799.1:p.[Ile445Met]	LOC103312586	103312586		103312586 [Gene Symbol: LOC103312586] [Locus Tag: TcasGA2_TC003588] [Chromosome: LG3] [Map Location: ] [Description: hypothetical protein] [Gene Type: protein-coding]	LOC103312586; TcasGA2_TC003588
266	NC_007418.3	8494624	SNV	C	A	Heterozygous	13	41	31.71	1	9	4	0.31	40	13	47	12	11	3.46	0.04	0.45	no	A/C	No	1	60.63	XP_008191839.1:c.147C>A	XP_008191839.1:p.Asn49Lys	LOC103312598	103312598		103312598 [Gene Symbol: LOC103312598] [Locus Tag: TcasGA2_TC003592] [Chromosome: LG3] [Map Location: ] [Description: major royal jelly protein 3] [Gene Type: protein-coding]	TcasGA2_TC003592; LOC103312598
267	NC_007418.3	8494721	SNV	G	A	Heterozygous	17	62	27.42	1	9	10	0.47	37.76	19	67	13	13	0.41	0.5	0.98	no	A/G	No	1	56.72	XP_008191839.1:c.244G>A	XP_008191839.1:p.Glu82Lys	LOC103312598	103312598		103312598 [Gene Symbol: LOC103312598] [Locus Tag: TcasGA2_TC003592] [Chromosome: LG3] [Map Location: ] [Description: major royal jelly protein 3] [Gene Type: protein-coding]	TcasGA2_TC003592; LOC103312598
268	NC_007418.3	8494776	SNV	A	G	Heterozygous	7	32	21.88	0.96	5	2	0.29	38.14	7	32	6	5	0.84	0.37	0.29	no	A/G	No	1	14.07	XP_008191839.1:c.299A>G	XP_008191839.1:p.Asp100Gly	LOC103312598	103312598		103312598 [Gene Symbol: LOC103312598] [Locus Tag: TcasGA2_TC003592] [Chromosome: LG3] [Map Location: ] [Description: major royal jelly protein 3] [Gene Type: protein-coding]	TcasGA2_TC003592; LOC103312598
269	NC_007418.3	8806795	SNV	G	C	Homozygous	20	20	100	1	11	11	0.5	36.5	22	22	10	16		1	1	no	C/C	No	1	80.11	XP_008191645.2:c.2133C>G	XP_008191645.2:p.Asp711Glu	LOC103312116	103312116		103312116 [Gene Symbol: LOC103312116] [Locus Tag: TcasGA2_TC002826] [Chromosome: LG3] [Map Location: ] [Description: uncharacterized LOC103312116] [Gene Type: protein-coding]	TcasGA2_TC002826; LOC103312116
270	NC_007418.3	8807527	SNV	T	G	Homozygous	22	22	100	1	12	12	0.5	36	24	24	10	13		1	1	no	G/G	No	1	86.11	XP_008191645.2:c.1401A>C	XP_008191645.2:p.Gln467His	LOC103312116	103312116		103312116 [Gene Symbol: LOC103312116] [Locus Tag: TcasGA2_TC002826] [Chromosome: LG3] [Map Location: ] [Description: uncharacterized LOC103312116] [Gene Type: protein-coding]	TcasGA2_TC002826; LOC103312116
271	NC_007418.3	8807549	SNV	A	G	Homozygous	20	20	100	1	10	13	0.43	35.8	23	23	11	11		1	1	no	G/G	No	1	80.1	XP_008191645.2:c.1379T>C	XP_008191645.2:p.Phe460Ser	LOC103312116	103312116		103312116 [Gene Symbol: LOC103312116] [Locus Tag: TcasGA2_TC002826] [Chromosome: LG3] [Map Location: ] [Description: uncharacterized LOC103312116] [Gene Type: protein-coding]	TcasGA2_TC002826; LOC103312116
272	NC_007418.3	9126248^9126249	Insertion	-	ATA	Homozygous	20	20	100	1	5	16	0.24	38.48	21	21	13	14		1	1	no	ATA/ATA	No	1	200	XP_015833339.1:c.[364_365insTAT]; XP_008192138.1:c.[1350+274_1350+275insATA]; XP_008192125.1:c.[1350+274_1350+275insATA]; XP_008192132.1:c.[1350+274_1350+275insATA]; XP_008192144.1:c.[1335+274_1335+275insATA]; XP_008192114.1:c.[1350+274_1350+275insATA]	XP_015833339.1:p.Val121_Ser122insLeu	LOC100141866, LOC107397509	100141866 , 107397509		100141866 [Gene Symbol: LOC100141866] [Locus Tag: TcasGA2_TC003616] [Chromosome: LG3] [Map Location: ] [Description: protein tramtrack, alpha isoform] [Gene Type: protein-coding] || 107397509 [Gene Symbol: LOC107397509] [Locus Tag: ] [Chromosome: LG3] [Map Location: ] [Description: uncharacterized LOC107397509] [Gene Type: protein-coding]	LOC100141866; TcasGA2_TC003616 || LOC107397509
273	NC_007418.3	9292583..9292584	MNV	TT	CC	Homozygous	20	20	100	1	4	18	0.18	37.75	22	22	13	17		1	1	no	CC/CC	No	1	200	XP_008192271.1:c.1223_1224delAAinsGG	XP_008192271.1:p.Gln408Arg	LOC100141585	100141585		100141585 [Gene Symbol: LOC100141585] [Locus Tag: TcasGA2_TC030754] [Chromosome: LG3] [Map Location: ] [Description: sushi, von Willebrand factor type A, EGF and pentraxin domain-containing protein 1] [Gene Type: protein-coding]	LOC100141585; TcasGA2_TC030754
274	NC_007418.3	9638798	SNV	T	C	Homozygous	26	26	100	1	18	15	0.45	37.62	33	33	15	18		1	1	no	C/C	No	1	98.15	XP_008192366.1:c.[3293A>G]; XP_015833405.1:c.[3293A>G]; XP_015833406.1:c.[2690A>G]; XP_008192372.1:c.[3293A>G]	XP_008192366.1:p.[Asp1098Gly]; XP_015833405.1:p.[Asp1098Gly]; XP_015833406.1:p.[Asp897Gly]; XP_008192372.1:p.[Asp1098Gly]	LOC659912	659912		659912 [Gene Symbol: LOC659912] [Locus Tag: TcasGA2_TC002804] [Chromosome: LG3] [Map Location: ] [Description: collagen alpha-2(IV) chain] [Gene Type: protein-coding]	LOC659912; TcasGA2_TC002804
275	NC_007418.3	9746250	SNV	A	T	Homozygous	20	20	100	1	3	17	0.15	36.4	20	20	10	12		1	1	no	T/T	No	1	81.7	XP_008192389.1:c.260T>A	XP_008192389.1:p.Leu87His	LOC103312734	103312734		103312734 [Gene Symbol: LOC103312734] [Locus Tag: TcasGA2_TC002799] [Chromosome: LG3] [Map Location: ] [Description: uncharacterized LOC103312734] [Gene Type: protein-coding]	LOC103312734; TcasGA2_TC002799
276	NC_007418.3	10573895	SNV	C	T	Homozygous	27	27	100	1	10	18	0.36	36.52	28	28	13	14		1	1	no	T/T	No	1	99.75	XP_972784.2:c.34C>T	XP_972784.2:p.Leu12Phe	LOC103312803, LOC661540	103312803 , 661540		103312803 [Gene Symbol: LOC103312803] [Locus Tag: TcasGA2_TC002783] [Chromosome: LG3] [Map Location: ] [Description: early growth response protein 1] [Gene Type: protein-coding] || 661540 [Gene Symbol: LOC661540] [Locus Tag: TcasGA2_TC003648] [Chromosome: LG3] [Map Location: ] [Description: syntaxin-17] [Gene Type: protein-coding]	TcasGA2_TC002783; LOC103312803 || TcasGA2_TC003648; LOC661540
277	NC_007418.3	10704490	SNV	C	T	Homozygous	21	21	100	1	10	15	0.4	36.43	25	25	13	13		1	1	no	T/T	No	1	84.7	XP_972452.1:c.619C>T	XP_972452.1:p.Pro207Ser	LOC661180	661180		661180 [Gene Symbol: LOC661180] [Locus Tag: TcasGA2_TC000042] [Chromosome: LG3] [Map Location: ] [Description: probable glutamine--tRNA ligase] [Gene Type: protein-coding]	LOC661180; TcasGA2_TC000042
278	NC_007418.3	10732268	SNV	C	T	Heterozygous	5	23	21.74	0.95	5	0	0	39.6	5	26	4	4	-1.16	0.27	0.22	no	C/T	No	1	12.64	XP_008199567.1:c.223G>A	XP_008199567.1:p.Val75Ile	LOC103314697	103314697		103314697 [Gene Symbol: LOC103314697] [Locus Tag: TcasGA2_TC000135] [Chromosome: LG3] [Map Location: ] [Description: uncharacterized LOC103314697] [Gene Type: protein-coding]	LOC103314697; TcasGA2_TC000135
279	NC_007418.3	10732270..10732272	MNV	TCT	AGA	Heterozygous	5	23	21.74	1	5	0	0	39.13	5	26	4	4	-1.68	0.43	0.22	no	complex	No	1	200	XP_008199567.1:c.219_221delAGAinsTCT	XP_008199567.1:p.Lys73_Asp74delinsAsnLeu	LOC103314697	103314697		103314697 [Gene Symbol: LOC103314697] [Locus Tag: TcasGA2_TC000135] [Chromosome: LG3] [Map Location: ] [Description: uncharacterized LOC103314697] [Gene Type: protein-coding]	LOC103314697; TcasGA2_TC000135
280	NC_007418.3	10732367	SNV	C	T	Heterozygous	6	23	26.09	1	2	6	0.25	40.17	8	30	5	4	1.47	0.04	0.59	no	C/T	No	1	25.11	XP_008199567.1:c.124G>A	XP_008199567.1:p.Gly42Ser	LOC103314697	103314697		103314697 [Gene Symbol: LOC103314697] [Locus Tag: TcasGA2_TC000135] [Chromosome: LG3] [Map Location: ] [Description: uncharacterized LOC103314697] [Gene Type: protein-coding]	LOC103314697; TcasGA2_TC000135
281	NC_007418.3	10732382	SNV	C	A	Heterozygous	7	23	30.43	1	4	4	0.5	37.29	8	30	5	5	-0.6	0.41	1	no	A/C	No	1	34.29	XP_008199567.1:c.109G>T	XP_008199567.1:p.Val37Phe	LOC103314697	103314697		103314697 [Gene Symbol: LOC103314697] [Locus Tag: TcasGA2_TC000135] [Chromosome: LG3] [Map Location: ] [Description: uncharacterized LOC103314697] [Gene Type: protein-coding]	LOC103314697; TcasGA2_TC000135
282	NC_007418.3	10854680	SNV	A	G	Homozygous	22	22	100	1	13	13	0.5	38.5	26	26	12	14		1	1	no	G/G	No	1	86.11	XP_970625.1:c.835A>G	XP_970625.1:p.Asn279Asp	LOC659205	659205		659205 [Gene Symbol: LOC659205] [Locus Tag: TcasGA2_TC000060] [Chromosome: LG3] [Map Location: ] [Description: tRNA dimethylallyltransferase, mitochondrial] [Gene Type: protein-coding]	TcasGA2_TC000060; LOC659205
283	NC_007418.3	10978803	SNV	G	A	Homozygous	21	21	100	1	10	13	0.43	38.81	23	23	10	12		1	1	no	A/A	No	1	84.7	XP_970014.1:c.236C>T	XP_970014.1:p.Ser79Leu	LOC658539	658539		658539 [Gene Symbol: LOC658539] [Locus Tag: TcasGA2_TC000114] [Chromosome: LG3] [Map Location: ] [Description: zinc finger protein OZF] [Gene Type: protein-coding]	TcasGA2_TC000114; LOC658539
284	NC_007418.3	11049678	SNV	T	G	Homozygous	20	20	100	1	15	10	0.4	37.95	25	25	13	16		1	1	no	G/G	No	1	80.09	XP_008199533.1:c.407A>C	XP_008199533.1:p.Asn136Thr	LOC657918	657918		657918 [Gene Symbol: LOC657918] [Locus Tag: TcasGA2_TC000110] [Chromosome: LG3] [Map Location: ] [Description: transcription termination factor 2] [Gene Type: protein-coding]	TcasGA2_TC000110; LOC657918
285	NC_007418.3	11170866	SNV	G	C	Heterozygous	10	25	40	1	8	3	0.27	38.8	11	28	7	7	1.61	0.34	0.37	no	C/G	No	1	70.5	XP_015833486.1:c.[50-9604C>G]; XP_015833482.1:c.[50-9604C>G]; XP_008199525.1:c.[50-9604C>G]; XP_015833483.1:c.[50-9604C>G]; XP_015833487.1:c.[50-9604C>G]; XP_015833473.1:c.[1855G>C]; XP_008199522.1:c.[50-9604C>G]; XP_015833484.1:c.[50-9604C>G]; XP_015833485.1:c.[50-9604C>G]; XP_008199524.1:c.[50-9604C>G]	XP_015833473.1:p.Val619Leu	LOC657135, LOC103312144	657135 , 103312144		657135 [Gene Symbol: LOC657135] [Locus Tag: TcasGA2_TC000103] [Chromosome: LG3] [Map Location: ] [Description: serine/threonine-protein phosphatase 2B catalytic subunit 2] [Gene Type: protein-coding] || 103312144 [Gene Symbol: LOC103312144] [Locus Tag: TcasGA2_TC000071] [Chromosome: LG3] [Map Location: ] [Description: uncharacterized LOC103312144] [Gene Type: protein-coding]	TcasGA2_TC000103; LOC657135 || LOC103312144; TcasGA2_TC000071
286	NC_007418.3	11493509	SNV	T	C	Homozygous	21	21	100	1	6	17	0.26	37.52	23	23	11	16		1	1	no	C/C	No	1	83.11	XP_008199507.1:c.2480A>G	XP_008199507.1:p.Asn827Ser	LOC100141909	100141909		100141909 [Gene Symbol: LOC100141909] [Locus Tag: TcasGA2_TC000086] [Chromosome: LG3] [Map Location: ] [Description: fibrillin-2] [Gene Type: protein-coding]	LOC100141909; TcasGA2_TC000086
287	NC_007418.3	11493574	SNV	G	T	Homozygous	22	22	100	1	16	9	0.36	37.5	25	25	9	15		1	1	no	T/T	No	1	87.71	XP_008199507.1:c.2415C>A	XP_008199507.1:p.Asp805Glu	LOC100141909	100141909		100141909 [Gene Symbol: LOC100141909] [Locus Tag: TcasGA2_TC000086] [Chromosome: LG3] [Map Location: ] [Description: fibrillin-2] [Gene Type: protein-coding]	LOC100141909; TcasGA2_TC000086
288	NC_007418.3	11493643	SNV	A	T	Homozygous	22	22	100	1	13	12	0.48	36.91	25	25	16	16		1	1	no	T/T	No	1	87.71	XP_008199507.1:c.2346T>A	XP_008199507.1:p.Ser782Arg	LOC100141909	100141909		100141909 [Gene Symbol: LOC100141909] [Locus Tag: TcasGA2_TC000086] [Chromosome: LG3] [Map Location: ] [Description: fibrillin-2] [Gene Type: protein-coding]	LOC100141909; TcasGA2_TC000086
289	NC_007418.3	11494060	SNV	T	A	Homozygous	21	21	100	1	9	14	0.39	37.38	23	23	14	15		1	1	no	A/A	No	1	84.7	XP_008199507.1:c.1929A>T	XP_008199507.1:p.Glu643Asp	LOC100141909	100141909		100141909 [Gene Symbol: LOC100141909] [Locus Tag: TcasGA2_TC000086] [Chromosome: LG3] [Map Location: ] [Description: fibrillin-2] [Gene Type: protein-coding]	LOC100141909; TcasGA2_TC000086
290	NC_007418.3	11515803	SNV	T	C	Homozygous	21	21	100	1	7	14	0.33	35.29	21	21	12	12		1	1	no	C/C	No	1	83.12	NP_001153712.1:c.1150T>C	NP_001153712.1:p.*384Arg	LOC655157	655157	catalase-like	655157 [Gene Symbol: LOC655157] [Locus Tag: TcasGA2_TC034503] [Chromosome: LG3] [Map Location: ] [Description: catalase-like] [Gene Type: protein-coding]	TcasGA2_TC034503; LOC655157
291	NC_007418.3	11927918	SNV	T	C	Heterozygous	7	22	31.82	1	5	5	0.5	38.57	10	28	5	5	1.62	0.73	0.86	no	C/T	No	1	41.85	XP_015833604.1:c.101T>C	XP_015833604.1:p.Val34Ala	LOC107397543	107397543		107397543 [Gene Symbol: LOC107397543] [Locus Tag: TcasGA2_TC003662] [Chromosome: LG3] [Map Location: ] [Description: uncharacterized LOC107397543] [Gene Type: protein-coding]	TcasGA2_TC003662; LOC107397543
292	NC_007418.3	12172229	SNV	A	G	Homozygous	26	26	100	1	7	19	0.27	37.65	26	26	12	15		1	1	no	G/G	No	1	98.15	XP_967967.1:c.526A>G	XP_967967.1:p.Lys176Glu	LOC656335	656335		656335 [Gene Symbol: LOC656335] [Locus Tag: TcasGA2_TC003671] [Chromosome: LG3] [Map Location: ] [Description: probable DNA-3-methyladenine glycosylase] [Gene Type: protein-coding]	TcasGA2_TC003671; LOC656335
293	NC_007418.3	12172247	SNV	T	A	Homozygous	24	24	100	1	4	20	0.17	37.62	24	24	10	12		1	1	no	A/A	No	1	93.72	XP_967967.1:c.544T>A	XP_967967.1:p.Cys182Ser	LOC656335	656335		656335 [Gene Symbol: LOC656335] [Locus Tag: TcasGA2_TC003671] [Chromosome: LG3] [Map Location: ] [Description: probable DNA-3-methyladenine glycosylase] [Gene Type: protein-coding]	TcasGA2_TC003671; LOC656335
294	NC_007418.3	12961877	SNV	C	T	Heterozygous	10	26	38.46	1	10	0	0	36.2	10	30	3	8	1.19	0.02	0.13	no	C/T	No	1	70.55	XP_008191127.1:c.[622G>A]; XP_015833615.1:c.[622G>A]; XP_008191129.1:c.[622G>A]; XP_008191135.1:c.[322G>A]; XP_008191132.1:c.[298G>A]; XP_008191131.1:c.[301G>A]; XP_008191128.1:c.[622G>A]	XP_008191127.1:p.[Gly208Ser]; XP_015833615.1:p.[Gly208Ser]; XP_008191129.1:p.[Gly208Ser]; XP_008191135.1:p.[Gly108Ser]; XP_008191132.1:p.[Gly100Ser]; XP_008191131.1:p.[Gly101Ser]; XP_008191128.1:p.[Gly208Ser]	LOC659574	659574		659574 [Gene Symbol: LOC659574] [Locus Tag: TcasGA2_TC002730] [Chromosome: LG3] [Map Location: ] [Description: caskin-1] [Gene Type: protein-coding]	TcasGA2_TC002730; LOC659574
295	NC_007418.3	13294324	SNV	A	G	Homozygous	18	21	85.71	0.84	18	2	0.1	37.33	20	25	11	13		0.83	0.77	no	G/G	No	1	8.07	XP_008191141.1:c.7249T>C	XP_008191141.1:p.Phe2417Leu	LOC660035	660035		660035 [Gene Symbol: LOC660035] [Locus Tag: TcasGA2_TC002723] [Chromosome: LG3] [Map Location: ] [Description: filamin-A] [Gene Type: protein-coding]	TcasGA2_TC002723; LOC660035
296	NC_007418.3	13594418	SNV	T	C	Homozygous	20	20	100	1	6	18	0.25	36.8	24	24	9	11		1	1	no	C/C	No	1	80.12	XP_967066.1:c.1102A>G	XP_967066.1:p.Ile368Val	LOC655428	655428		655428 [Gene Symbol: LOC655428] [Locus Tag: TcasGA2_TC002712] [Chromosome: LG3] [Map Location: ] [Description: nudC domain-containing protein 1] [Gene Type: protein-coding]	TcasGA2_TC002712; LOC655428
297	NC_007418.3	13594422	SNV	G	T	Homozygous	21	21	100	1	7	17	0.29	37.1	24	24	11	13		1	1	no	T/T	No	1	81.7	XP_967066.1:c.1098C>A	XP_967066.1:p.Ser366Arg	LOC655428	655428		655428 [Gene Symbol: LOC655428] [Locus Tag: TcasGA2_TC002712] [Chromosome: LG3] [Map Location: ] [Description: nudC domain-containing protein 1] [Gene Type: protein-coding]	TcasGA2_TC002712; LOC655428
298	NC_007418.3	13594484	SNV	G	C	Homozygous	20	20	100	1	5	16	0.24	38.1	21	21	14	12		1	1	no	C/C	No	1	80.11	XP_967066.1:c.1036C>G	XP_967066.1:p.Pro346Ala	LOC655428	655428		655428 [Gene Symbol: LOC655428] [Locus Tag: TcasGA2_TC002712] [Chromosome: LG3] [Map Location: ] [Description: nudC domain-containing protein 1] [Gene Type: protein-coding]	TcasGA2_TC002712; LOC655428
299	NC_007418.3	14026713..14026714	MNV	TT	CC	Heterozygous	8	22	36.36	1	5	3	0.38	39.62	8	22	5	6	0.55	0.77	0.72	yes	complex	No	1	200	XP_015833646.1:c.[1280_1281delTTinsCC]; XP_015833649.1:c.[53-9902_53-9901delAAinsGG]; XP_015833647.1:c.[1280_1281delTTinsCC]; XP_015833650.1:c.[53-9992_53-9991delAAinsGG]; XP_015833641.1:c.[1280_1281delTTinsCC]; XP_008191171.1:c.[126+2733_126+2734delTTinsCC]; XP_015833643.1:c.[1280_1281delTTinsCC]; XP_015833642.1:c.[1280_1281delTTinsCC]; XP_015833640.1:c.[1280_1281delTTinsCC]; XP_015833645.1:c.[1…	XP_015833646.1:p.[Ile427Thr]; XP_015833647.1:p.[Ile427Thr]; XP_015833641.1:p.[Ile427Thr]; XP_015833643.1:p.[Ile427Thr]; XP_015833642.1:p.[Ile427Thr]; XP_015833640.1:p.[Ile427Thr]; XP_015833645.1:p.[Ile427Thr]; XP_015833644.1:p.[Ile427Thr]	LOC656062, LOC656669, LOC103312407	656062 , 656669 , 103312407		656062 [Gene Symbol: LOC656062] [Locus Tag: TcasGA2_TC002698] [Chromosome: LG3] [Map Location: ] [Description: thioredoxin reductase 1, mitochondrial] [Gene Type: protein-coding] || 656669 [Gene Symbol: LOC656669] [Locus Tag: TcasGA2_TC003732] [Chromosome: LG3] [Map Location: ] [Description: C-factor] [Gene Type: protein-coding] || 103312407 [Gene Symbol: LOC103312407] [Locus Tag: ] [Chromosome: …	LOC656062; TcasGA2_TC002698 || TcasGA2_TC003732; LOC656669 || LOC103312407
300	NC_007418.3	14026876	SNV	A	T	Heterozygous	6	21	28.57	1	3	3	0.5	40.5	6	22	4	4	-0.39	0.2	0.68	no	A/T	No	1	30.72	XP_015833645.1:c.[1443A>T]; XP_015833650.1:c.[53-10154T>A]; XP_008191171.1:c.[126+2896A>T]; XP_015833649.1:c.[53-10064T>A]; XP_015833644.1:c.[1443A>T]; XP_015833640.1:c.[1443A>T]; XP_015833641.1:c.[1443A>T]; XP_015833642.1:c.[1443A>T]; XP_015833647.1:c.[1443A>T]; XP_015833643.1:c.[1443A>T]; XP_015833646.1:c.[1443A>T]	XP_015833645.1:p.[Lys481Asn]; XP_015833644.1:p.[Lys481Asn]; XP_015833640.1:p.[Lys481Asn]; XP_015833641.1:p.[Lys481Asn]; XP_015833642.1:p.[Lys481Asn]; XP_015833647.1:p.[Lys481Asn]; XP_015833643.1:p.[Lys481Asn]; XP_015833646.1:p.[Lys481Asn]	LOC656062, LOC656669, LOC103312407	656062 , 656669 , 103312407		656062 [Gene Symbol: LOC656062] [Locus Tag: TcasGA2_TC002698] [Chromosome: LG3] [Map Location: ] [Description: thioredoxin reductase 1, mitochondrial] [Gene Type: protein-coding] || 656669 [Gene Symbol: LOC656669] [Locus Tag: TcasGA2_TC003732] [Chromosome: LG3] [Map Location: ] [Description: C-factor] [Gene Type: protein-coding] || 103312407 [Gene Symbol: LOC103312407] [Locus Tag: ] [Chromosome: …	LOC656062; TcasGA2_TC002698 || TcasGA2_TC003732; LOC656669 || LOC103312407
301	NC_007418.3	14026882	SNV	T	G	Heterozygous	8	21	38.1	1	0	8	0	39.62	8	24	4	5	0.04	0.2	0.31	no	G/T	No	1	56.82	XP_015833643.1:c.[1449T>G]; XP_015833642.1:c.[1449T>G]; XP_015833641.1:c.[1449T>G]; XP_015833646.1:c.[1449T>G]; XP_015833640.1:c.[1449T>G]; XP_015833650.1:c.[53-10160A>C]; XP_008191171.1:c.[126+2902T>G]; XP_015833644.1:c.[1449T>G]; XP_015833649.1:c.[53-10070A>C]; XP_015833647.1:c.[1449T>G]; XP_015833645.1:c.[1449T>G]	XP_015833643.1:p.[Asp483Glu]; XP_015833642.1:p.[Asp483Glu]; XP_015833641.1:p.[Asp483Glu]; XP_015833646.1:p.[Asp483Glu]; XP_015833640.1:p.[Asp483Glu]; XP_015833644.1:p.[Asp483Glu]; XP_015833647.1:p.[Asp483Glu]; XP_015833645.1:p.[Asp483Glu]	LOC656062, LOC656669, LOC103312407	656062 , 656669 , 103312407		656062 [Gene Symbol: LOC656062] [Locus Tag: TcasGA2_TC002698] [Chromosome: LG3] [Map Location: ] [Description: thioredoxin reductase 1, mitochondrial] [Gene Type: protein-coding] || 656669 [Gene Symbol: LOC656669] [Locus Tag: TcasGA2_TC003732] [Chromosome: LG3] [Map Location: ] [Description: C-factor] [Gene Type: protein-coding] || 103312407 [Gene Symbol: LOC103312407] [Locus Tag: ] [Chromosome: …	LOC656062; TcasGA2_TC002698 || TcasGA2_TC003732; LOC656669 || LOC103312407
302	NC_007418.3	14027084	SNV	G	A	Heterozygous	14	20	70	1	6	10	0.38	38.79	16	26	10	10	0.21	0.84	0.97	no	A/G	No	1	34.54	XP_015833642.1:c.[1651G>A]; XP_015833649.1:c.[53-10272C>T]; XP_015833647.1:c.[1651G>A]; XP_008191171.1:c.[126+3104G>A]; XP_015833646.1:c.[1651G>A]; XP_015833645.1:c.[1651G>A]; XP_015833641.1:c.[1651G>A]; XP_015833650.1:c.[53-10362C>T]; XP_015833640.1:c.[1651G>A]; XP_015833643.1:c.[1651G>A]; XP_015833644.1:c.[1651G>A]	XP_015833642.1:p.[Ala551Thr]; XP_015833647.1:p.[Ala551Thr]; XP_015833646.1:p.[Ala551Thr]; XP_015833645.1:p.[Ala551Thr]; XP_015833641.1:p.[Ala551Thr]; XP_015833640.1:p.[Ala551Thr]; XP_015833643.1:p.[Ala551Thr]; XP_015833644.1:p.[Ala551Thr]	LOC656062, LOC656669, LOC103312407	656062 , 656669 , 103312407		656062 [Gene Symbol: LOC656062] [Locus Tag: TcasGA2_TC002698] [Chromosome: LG3] [Map Location: ] [Description: thioredoxin reductase 1, mitochondrial] [Gene Type: protein-coding] || 656669 [Gene Symbol: LOC656669] [Locus Tag: TcasGA2_TC003732] [Chromosome: LG3] [Map Location: ] [Description: C-factor] [Gene Type: protein-coding] || 103312407 [Gene Symbol: LOC103312407] [Locus Tag: ] [Chromosome: …	LOC656062; TcasGA2_TC002698 || TcasGA2_TC003732; LOC656669 || LOC103312407
303	NC_007418.3	14122782	SNV	G	A	Heterozygous	11	20	55	1	2	9	0.18	38.64	11	22	6	7	-0.61	0.39	0.44	no	A/G	No	1	72.77	XP_015833636.1:c.820G>A	XP_015833636.1:p.Gly274Arg	LOC657090, LOC103312177	657090 , 103312177		657090 [Gene Symbol: LOC657090] [Locus Tag: TcasGA2_TC032499] [Chromosome: LG3] [Map Location: ] [Description: solute carrier family 25 member 35] [Gene Type: protein-coding] || 103312177 [Gene Symbol: LOC103312177] [Locus Tag: ] [Chromosome: LG3] [Map Location: ] [Description: jerky protein homolog-like] [Gene Type: protein-coding]	LOC657090; TcasGA2_TC032499 || LOC103312177
304	NC_007418.3	14372125	SNV	G	C	Homozygous	22	22	100	1	14	9	0.39	39.64	23	23	12	14		1	1	no	C/C	No	1	86.13	XP_015833657.1:c.301G>C	XP_015833657.1:p.Val101Leu	LOC658029	658029		658029 [Gene Symbol: LOC658029] [Locus Tag: TcasGA2_TC032509] [Chromosome: LG3] [Map Location: ] [Description: cytochrome P450 6k1] [Gene Type: protein-coding]	LOC658029; CYP345D2; TcasGA2_TC032509
305	NC_007418.3	14372155..14372156	MNV	TT	GC	Heterozygous	5	20	25	1	3	2	0.4	36.3	5	23	3	5	0.3	0.13	0.89	no	complex	No	1	200	XP_015833657.1:c.331_332delTTinsGC	XP_015833657.1:p.Phe111Ala	LOC658029	658029		658029 [Gene Symbol: LOC658029] [Locus Tag: TcasGA2_TC032509] [Chromosome: LG3] [Map Location: ] [Description: cytochrome P450 6k1] [Gene Type: protein-coding]	LOC658029; CYP345D2; TcasGA2_TC032509
306	NC_007418.3	14382912	SNV	A	G	Heterozygous	23	30	76.67	0.99	21	3	0.12	38.65	24	31	13	16	-2.21	0.95	0.98	no	A/G	No	1	18.51	XP_008190375.2:c.370A>G	XP_008190375.2:p.Ile124Val	LOC103312175	103312175		103312175 [Gene Symbol: LOC103312175] [Locus Tag: TcasGA2_TC032510] [Chromosome: LG3] [Map Location: ] [Description: uncharacterized LOC103312175] [Gene Type: protein-coding]	LOC103312175; TcasGA2_TC032510; Or327
307	NC_007418.3	14383198	SNV	C	T	Heterozygous	14	22	63.64	1	5	12	0.29	38.43	17	26	10	12	1.13	0.89	0.97	no	C/T	No	1	54.62	XP_008190375.2:c.656C>T	XP_008190375.2:p.Ser219Leu	LOC103312175	103312175		103312175 [Gene Symbol: LOC103312175] [Locus Tag: TcasGA2_TC032510] [Chromosome: LG3] [Map Location: ] [Description: uncharacterized LOC103312175] [Gene Type: protein-coding]	LOC103312175; TcasGA2_TC032510; Or327
308	NC_007418.3	14473908	SNV	G	A	Heterozygous	11	23	47.83	1	8	6	0.43	35.27	14	30	5	8	-1.02	0.3	0.98	no	A/G	No	1	88.71	XP_008199271.1:c.482C>T	XP_008199271.1:p.Ala161Val	LOC655963	655963		655963 [Gene Symbol: LOC655963] [Locus Tag: TcasGA2_TC010521] [Chromosome: LG3] [Map Location: ] [Description: probable palmitoyltransferase ZDHHC1] [Gene Type: protein-coding]	TcasGA2_TC010521; LOC655963
309	NC_007418.3	14923401	SNV	T	C	Homozygous	22	23	95.65	1	14	9	0.39	38.82	23	24	16	15		1	1	no	C/C	No	1	61.21	XP_968632.1:c.[1067T>C]; XP_008199234.1:c.[158T>C]	XP_968632.1:p.[Leu356Ser]; XP_008199234.1:p.[Leu53Ser]	LOC657051	657051		657051 [Gene Symbol: LOC657051] [Locus Tag: TcasGA2_TC010540] [Chromosome: LG3] [Map Location: ] [Description: laminin subunit gamma-1] [Gene Type: protein-coding]	LOC657051; TcasGA2_TC010540
310	NC_007418.3	15070095..15070096	Deletion	CC	-	Heterozygous	19	40	47.5	1	14	5	0.26	31.16	19	45	12	13	-2.14	0.1	0.81	no	complex	Yes	10	200	XP_008199236.2:c.[920_921delGG]; XP_015833669.1:c.[920_921delGG]; XP_015833666.1:c.[920_921delGG]; XP_008199243.1:c.[1715-7274_1715-7273delCC]; XP_008199240.1:c.[1715-7274_1715-7273delCC]; XP_015833667.1:c.[920_921delGG]; XP_008199244.1:c.[1715-7274_1715-7273delCC]; XP_008199241.1:c.[1715-7274_1715-7273delCC]; XP_008199242.1:c.[1715-7274_1715-7273delCC]; XP_008199245.1:c.[86-7274_86-7273delCC]; X…	XP_008199236.2:p.[Gly307fs]; XP_015833669.1:p.[Gly307fs]; XP_015833666.1:p.[Gly307fs]; XP_015833667.1:p.[Gly307fs]; XP_015833670.1:p.[Gly307fs]; XP_008199239.2:p.[Gly285fs]	LOC657292, LOC103314596	657292 , 103314596		657292 [Gene Symbol: LOC657292] [Locus Tag: TcasGA2_TC010542] [Chromosome: LG3] [Map Location: ] [Description: disco-interacting protein 2] [Gene Type: protein-coding] || 103314596 [Gene Symbol: LOC103314596] [Locus Tag: TcasGA2_TC010509] [Chromosome: LG3] [Map Location: ] [Description: uncharacterized LOC103314596] [Gene Type: protein-coding]	LOC657292; TcasGA2_TC010542 || LOC103314596; TcasGA2_TC010509
311	NC_007418.3	15070145	SNV	C	A	Heterozygous	10	26	38.46	1	1	10	0.09	39.6	11	27	5	4	1.69	0.00557	0.09	no	A/C	No	1	64.15	XP_008199242.1:c.[1715-7224C>A]; XP_015833667.1:c.[871G>T]; XP_008199245.1:c.[86-7224C>A]; XP_008199246.1:c.[1715-7224C>A]; XP_015833666.1:c.[871G>T]; XP_015833670.1:c.[871G>T]; XP_015833665.1:c.[152-7224C>A]; XP_008199241.1:c.[1715-7224C>A]; XP_008199239.2:c.[805G>T]; XP_008199244.1:c.[1715-7224C>A]; XP_015833669.1:c.[871G>T]; XP_008199240.1:c.[1715-7224C>A]; XP_008199243.1:c.[1715-7224C>A]; XP_…	XP_015833667.1:p.[Gly291Cys]; XP_015833666.1:p.[Gly291Cys]; XP_015833670.1:p.[Gly291Cys]; XP_008199239.2:p.[Gly269Cys]; XP_015833669.1:p.[Gly291Cys]; XP_008199236.2:p.[Gly291Cys]	LOC657292, LOC103314596	657292 , 103314596		657292 [Gene Symbol: LOC657292] [Locus Tag: TcasGA2_TC010542] [Chromosome: LG3] [Map Location: ] [Description: disco-interacting protein 2] [Gene Type: protein-coding] || 103314596 [Gene Symbol: LOC103314596] [Locus Tag: TcasGA2_TC010509] [Chromosome: LG3] [Map Location: ] [Description: uncharacterized LOC103314596] [Gene Type: protein-coding]	LOC657292; TcasGA2_TC010542 || LOC103314596; TcasGA2_TC010509
312	NC_007418.3	15070634	SNV	T	A	Heterozygous	6	28	21.43	0.93	1	5	0.17	39.67	6	33	4	5	2.02	0.31	0.39	no	A/T	No	1	11.42	XP_015833665.1:c.[152-6735T>A]; XP_008199242.1:c.[1715-6735T>A]; XP_008199240.1:c.[1715-6735T>A]; XP_008199245.1:c.[86-6735T>A]; XP_015833670.1:c.[382A>T]; XP_015833666.1:c.[382A>T]; XP_008199239.2:c.[382A>T]; XP_015833669.1:c.[382A>T]; XP_008199244.1:c.[1715-6735T>A]; XP_008199243.1:c.[1715-6735T>A]; XP_008199236.2:c.[382A>T]; XP_008199246.1:c.[1715-6735T>A]; XP_008199241.1:c.[1715-6735T>A]; XP_…	XP_015833670.1:p.[Thr128Ser]; XP_015833666.1:p.[Thr128Ser]; XP_008199239.2:p.[Thr128Ser]; XP_015833669.1:p.[Thr128Ser]; XP_008199236.2:p.[Thr128Ser]; XP_015833667.1:p.[Thr128Ser]	LOC657292, LOC103314596	657292 , 103314596		657292 [Gene Symbol: LOC657292] [Locus Tag: TcasGA2_TC010542] [Chromosome: LG3] [Map Location: ] [Description: disco-interacting protein 2] [Gene Type: protein-coding] || 103314596 [Gene Symbol: LOC103314596] [Locus Tag: TcasGA2_TC010509] [Chromosome: LG3] [Map Location: ] [Description: uncharacterized LOC103314596] [Gene Type: protein-coding]	LOC657292; TcasGA2_TC010542 || LOC103314596; TcasGA2_TC010509
313	NC_007418.3	15070648	SNV	A	G	Heterozygous	18	23	78.26	0.95	11	11	0.5	38.44	22	28	13	14	0.34	0.9	1	no	A/G	No	1	12.74	XP_015833667.1:c.[368T>C]; XP_008199243.1:c.[1715-6721A>G]; XP_008199246.1:c.[1715-6721A>G]; XP_008199244.1:c.[1715-6721A>G]; XP_015833670.1:c.[368T>C]; XP_008199245.1:c.[86-6721A>G]; XP_008199240.1:c.[1715-6721A>G]; XP_015833669.1:c.[368T>C]; XP_008199236.2:c.[368T>C]; XP_015833665.1:c.[152-6721A>G]; XP_008199242.1:c.[1715-6721A>G]; XP_015833666.1:c.[368T>C]; XP_008199241.1:c.[1715-6721A>G]; XP_…	XP_015833667.1:p.[Leu123Pro]; XP_015833670.1:p.[Leu123Pro]; XP_015833669.1:p.[Leu123Pro]; XP_008199236.2:p.[Leu123Pro]; XP_015833666.1:p.[Leu123Pro]; XP_008199239.2:p.[Leu123Pro]	LOC657292, LOC103314596	657292 , 103314596		657292 [Gene Symbol: LOC657292] [Locus Tag: TcasGA2_TC010542] [Chromosome: LG3] [Map Location: ] [Description: disco-interacting protein 2] [Gene Type: protein-coding] || 103314596 [Gene Symbol: LOC103314596] [Locus Tag: TcasGA2_TC010509] [Chromosome: LG3] [Map Location: ] [Description: uncharacterized LOC103314596] [Gene Type: protein-coding]	LOC657292; TcasGA2_TC010542 || LOC103314596; TcasGA2_TC010509
314	NC_007418.3	15660251	SNV	A	G	Homozygous	23	23	100	1	6	17	0.26	37.78	23	23	11	11		1	1	no	G/G	No	1	89.12	XP_008199265.1:c.628A>G	XP_008199265.1:p.Lys210Glu	LOC103314602	103314602		103314602 [Gene Symbol: LOC103314602] [Locus Tag: TcasGA2_TC010558] [Chromosome: LG3] [Map Location: ] [Description: hypothetical protein] [Gene Type: protein-coding]	LOC103314602; TcasGA2_TC010558
315	NC_007418.3	16928941	SNV	C	T	Homozygous	23	23	100	1	15	14	0.48	35.7	29	29	9	14		1	1	no	T/T	No	1	90.73	XP_015833814.1:c.[5C>T]; XP_015833815.1:c.[5C>T]; XP_008191262.1:c.[5C>T]; XP_008191260.1:c.[5C>T]	XP_015833814.1:p.[Pro2Leu]; XP_015833815.1:p.[Pro2Leu]; XP_008191262.1:p.[Pro2Leu]; XP_008191260.1:p.[Pro2Leu]	LOC103312431	103312431		103312431 [Gene Symbol: LOC103312431] [Locus Tag: TcasGA2_TC002650] [Chromosome: LG3] [Map Location: ] [Description: hypothetical protein] [Gene Type: protein-coding]	TcasGA2_TC002650; LOC103312431
316	NC_007418.3	17153563	SNV	C	T	Heterozygous	14	31	45.16	1	13	3	0.19	39	16	33	8	9	-2.7	0.95	0.83	no	C/T	No	1	104.66	XP_015833782.1:c.362C>T	XP_015833782.1:p.Pro121Leu	LOC107397596	107397596		107397596 [Gene Symbol: LOC107397596] [Locus Tag: TcasGA2_TC002657] [Chromosome: LG3] [Map Location: ] [Description: uncharacterized protein K02A2.6-like] [Gene Type: protein-coding]	TcasGA2_TC002657; LOC107397596
317	NC_007418.3	17153588	SNV	G	T	Heterozygous	16	33	48.48	1	12	6	0.33	38.31	18	39	10	10	-0.79	0.2	0.99	no	G/T	No	1	121.26	XP_015833782.1:c.387G>T	XP_015833782.1:p.Gln129His	LOC107397596	107397596		107397596 [Gene Symbol: LOC107397596] [Locus Tag: TcasGA2_TC002657] [Chromosome: LG3] [Map Location: ] [Description: uncharacterized protein K02A2.6-like] [Gene Type: protein-coding]	TcasGA2_TC002657; LOC107397596
318	NC_007418.3	17155333	SNV	A	C	Heterozygous	7	22	31.82	1	4	4	0.5	38.57	8	24	5	7	0.7	0.66	0.98	no	A/C	No	1	41.42	XP_015833782.1:c.2132A>C	XP_015833782.1:p.Tyr711Ser	LOC107397596	107397596		107397596 [Gene Symbol: LOC107397596] [Locus Tag: TcasGA2_TC002657] [Chromosome: LG3] [Map Location: ] [Description: uncharacterized protein K02A2.6-like] [Gene Type: protein-coding]	TcasGA2_TC002657; LOC107397596
319	NC_007418.3	17584490	SNV	C	T	Heterozygous	6	20	30	1	6	0	0	37.83	6	25	4	4	-1.07	0.19	0.3	no	C/T	No	1	33.49	XP_015833805.1:c.334C>T	XP_015833805.1:p.Leu112Phe	LOC103312427	103312427		103312427 [Gene Symbol: LOC103312427] [Locus Tag: ] [Chromosome: LG3] [Map Location: ] [Description: leucine-rich repeat-containing protein 15-like] [Gene Type: protein-coding]	LOC103312427
320	NC_007418.3	17584595	SNV	C	A	Heterozygous	17	31	54.84	1	8	13	0.38	38.71	21	36	11	12	-0.48	0.87	0.99	no	A/C	No	1	105.78	XP_015833805.1:c.439C>A	XP_015833805.1:p.Leu147Ile	LOC103312427	103312427		103312427 [Gene Symbol: LOC103312427] [Locus Tag: ] [Chromosome: LG3] [Map Location: ] [Description: leucine-rich repeat-containing protein 15-like] [Gene Type: protein-coding]	LOC103312427
321	NC_007418.3	17584597..17584598	MNV	TC	CT	Heterozygous	7	31	22.58	1	4	4	0.5	40	8	36	6	6		0.41	0.99	no	complex	No	1	200	XP_015833805.1:c.441_442delTCinsCT	XP_015833805.1:p.Gln148*	LOC103312427	103312427		103312427 [Gene Symbol: LOC103312427] [Locus Tag: ] [Chromosome: LG3] [Map Location: ] [Description: leucine-rich repeat-containing protein 15-like] [Gene Type: protein-coding]	LOC103312427
322	NC_007418.3	17584619	SNV	A	C	Heterozygous	10	25	40	1	6	4	0.4	39.3	10	28	6	8	1.89	0.92	0.89	no	A/C	No	1	71.4	XP_015833805.1:c.463A>C	XP_015833805.1:p.Thr155Pro	LOC103312427	103312427		103312427 [Gene Symbol: LOC103312427] [Locus Tag: ] [Chromosome: LG3] [Map Location: ] [Description: leucine-rich repeat-containing protein 15-like] [Gene Type: protein-coding]	LOC103312427
323	NC_007418.3	17584651	SNV	A	T	Heterozygous	14	30	46.67	1	9	5	0.36	37.64	14	32	7	8	-0.85	0.58	0.92	no	A/T	No	1	107.79	XP_015833805.1:c.495A>T	XP_015833805.1:p.Leu165Phe	LOC103312427	103312427		103312427 [Gene Symbol: LOC103312427] [Locus Tag: ] [Chromosome: LG3] [Map Location: ] [Description: leucine-rich repeat-containing protein 15-like] [Gene Type: protein-coding]	LOC103312427
324	NC_007418.3	17584656	SNV	C	T	Heterozygous	7	27	25.93	1	2	5	0.29	38.29	7	30	6	7	0.77	0.64	0.77	no	complex	No	1	148.08	XP_015833805.1:c.500C>T	XP_015833805.1:p.Ser167Phe	LOC103312427	103312427		103312427 [Gene Symbol: LOC103312427] [Locus Tag: ] [Chromosome: LG3] [Map Location: ] [Description: leucine-rich repeat-containing protein 15-like] [Gene Type: protein-coding]	LOC103312427
325	NC_007418.3	17584684	SNV	T	A	Heterozygous	15	25	60	1	8	9	0.47	39.33	17	27	7	7	-0.39	0.22	0.99	no	A/T	No	1	70.64	XP_015833805.1:c.528T>A	XP_015833805.1:p.Cys176*	LOC103312427	103312427		103312427 [Gene Symbol: LOC103312427] [Locus Tag: ] [Chromosome: LG3] [Map Location: ] [Description: leucine-rich repeat-containing protein 15-like] [Gene Type: protein-coding]	LOC103312427
326	NC_007418.3	17584715	SNV	A	G	Homozygous	26	26	100	1	15	13	0.46	38.31	28	28	13	16		1	1	no	G/G	No	1	98.14	XP_015833805.1:c.559A>G	XP_015833805.1:p.Lys187Glu	LOC103312427	103312427		103312427 [Gene Symbol: LOC103312427] [Locus Tag: ] [Chromosome: LG3] [Map Location: ] [Description: leucine-rich repeat-containing protein 15-like] [Gene Type: protein-coding]	LOC103312427
327	NC_007418.3	17584819	SNV	T	G	Heterozygous	21	28	75	0.99	11	11	0.5	39.19	22	29	10	13	1.22	0.99	1	no	G/T	No	1	20.54	XP_015833805.1:c.663T>G	XP_015833805.1:p.Phe221Leu	LOC103312427	103312427		103312427 [Gene Symbol: LOC103312427] [Locus Tag: ] [Chromosome: LG3] [Map Location: ] [Description: leucine-rich repeat-containing protein 15-like] [Gene Type: protein-coding]	LOC103312427
328	NC_007418.3	17584984	SNV	T	A	Heterozygous	7	28	25	1	6	4	0.4	38	10	31	5	5	-0.34	0.39	1	no	A/T	No	1	23.87	XP_015833805.1:c.828T>A	XP_015833805.1:p.Asp276Glu	LOC103312427	103312427		103312427 [Gene Symbol: LOC103312427] [Locus Tag: ] [Chromosome: LG3] [Map Location: ] [Description: leucine-rich repeat-containing protein 15-like] [Gene Type: protein-coding]	LOC103312427
329	NC_007418.3	17902318	SNV	G	T	Homozygous	25	25	100	1	11	14	0.44	37.76	25	25	14	20		1	1	no	T/T	No	1	96.74	XP_968591.1:c.64C>A	XP_968591.1:p.Gln22Lys	LOC657009	657009		657009 [Gene Symbol: LOC657009] [Locus Tag: TcasGA2_TC003766] [Chromosome: LG3] [Map Location: ] [Description: ADP-ribosylation factor-like protein 6-interacting protein 4] [Gene Type: protein-coding]	LOC657009; TcasGA2_TC003766
330	NC_007418.3	17902320	SNV	A	G	Homozygous	24	24	100	1	11	13	0.46	37.54	24	24	14	19		1	1	no	G/G	No	1	92.13	XP_968591.1:c.62T>C	XP_968591.1:p.Val21Ala	LOC657009	657009		657009 [Gene Symbol: LOC657009] [Locus Tag: TcasGA2_TC003766] [Chromosome: LG3] [Map Location: ] [Description: ADP-ribosylation factor-like protein 6-interacting protein 4] [Gene Type: protein-coding]	LOC657009; TcasGA2_TC003766
331	NC_007418.3	17902330	SNV	A	T	Homozygous	20	20	100	1	9	11	0.45	35.75	20	20	13	16		1	1	no	T/T	No	1	81.69	XP_968591.1:c.52T>A	XP_968591.1:p.Ser18Thr	LOC657009	657009		657009 [Gene Symbol: LOC657009] [Locus Tag: TcasGA2_TC003766] [Chromosome: LG3] [Map Location: ] [Description: ADP-ribosylation factor-like protein 6-interacting protein 4] [Gene Type: protein-coding]	LOC657009; TcasGA2_TC003766
332	NC_007418.3	18433976	SNV	G	T	Heterozygous	11	20	55	1	6	8	0.43	38.36	14	24	7	7	1.79	0.28	1	no	G/T	No	1	72.31	XP_008191203.1:c.[4639C>A]; XP_008191205.1:c.[4147C>A]; XP_008191204.1:c.[4708C>A]; XP_008191202.1:c.[4708C>A]	XP_008191203.1:p.[Leu1547Ile]; XP_008191205.1:p.[Leu1383Ile]; XP_008191204.1:p.[Leu1570Ile]; XP_008191202.1:p.[Leu1570Ile]	LOC103312419	103312419		103312419 [Gene Symbol: LOC103312419] [Locus Tag: TcasGA2_TC003753] [Chromosome: LG3] [Map Location: ] [Description: maternal protein tudor] [Gene Type: protein-coding]	tud; LOC103312419; tudor; TcasGA2_TC003753
333	NC_007418.3	18444345	SNV	C	T	Heterozygous	9	22	40.91	1	3	6	0.33	36.67	9	23	5	5	-0.73	0.94	0.51	no	C/T	No	1	66.17	XP_008191202.1:c.[1703G>A]; XP_008191203.1:c.[1703G>A]; XP_008191204.1:c.[1703G>A]; XP_008191205.1:c.[1142G>A]	XP_008191202.1:p.[Arg568Lys]; XP_008191203.1:p.[Arg568Lys]; XP_008191204.1:p.[Arg568Lys]; XP_008191205.1:p.[Arg381Lys]	LOC103312419	103312419		103312419 [Gene Symbol: LOC103312419] [Locus Tag: TcasGA2_TC003753] [Chromosome: LG3] [Map Location: ] [Description: maternal protein tudor] [Gene Type: protein-coding]	tud; LOC103312419; tudor; TcasGA2_TC003753
334	NC_007418.3	18478156^18478157	Insertion	-	TGC	Homozygous	21	21	100	1	9	15	0.38	36.86	24	24	10	13		1	1	no	TGC/TGC	No	1	200	XP_015833722.1:c.[560_561insGCA]; XP_015833721.1:c.[503_504insGCA]; XP_015833720.1:c.[560_561insGCA]; XP_015833719.1:c.[560_561insGCA]	XP_015833722.1:p.[Gln192_Met193insGln]; XP_015833721.1:p.[Gln173_Met174insGln]; XP_015833720.1:p.[Gln192_Met193insGln]; XP_015833719.1:p.[Gln192_Met193insGln]	LOC655591, LOC655187	655591 , 655187		655591 [Gene Symbol: LOC655591] [Locus Tag: TcasGA2_TC003752] [Chromosome: LG3] [Map Location: ] [Description: polyhomeotic] [Gene Type: protein-coding] || 655187 [Gene Symbol: LOC655187] [Locus Tag: TcasGA2_TC002688] [Chromosome: LG3] [Map Location: ] [Description: D-2-hydroxyglutarate dehydrogenase, mitochondrial] [Gene Type: protein-coding]	TcasGA2_TC003752; ph; LOC655591 || LOC655187; TcasGA2_TC002688
335	NC_007418.3	18694558	SNV	G	A	Heterozygous	12	22	54.55	1	7	5	0.42	39	12	22	5	9	1.29	0.69	1	no	A/G	No	1	80	XP_972555.3:c.13159C>T	XP_972555.3:p.Leu4387Phe	LOC661291	661291		661291 [Gene Symbol: LOC661291] [Locus Tag: ] [Chromosome: LG3] [Map Location: ] [Description: midasin] [Gene Type: protein-coding]	LOC661291; Mdn1
336	NC_007418.3	18694561	SNV	C	T	Heterozygous	13	23	56.52	1	8	5	0.38	39.15	13	23	6	9	0.68	0.69	1	no	C/T	No	1	77.38	XP_972555.3:c.13156G>A	XP_972555.3:p.Asp4386Asn	LOC661291	661291		661291 [Gene Symbol: LOC661291] [Locus Tag: ] [Chromosome: LG3] [Map Location: ] [Description: midasin] [Gene Type: protein-coding]	LOC661291; Mdn1
337	NC_007418.3	18694567	SNV	G	A	Heterozygous	12	22	54.55	1	7	5	0.42	39	12	22	6	8	-0.3	0.68	1	no	A/G	No	1	80.01	XP_972555.3:c.13150C>T	XP_972555.3:p.Pro4384Ser	LOC661291	661291		661291 [Gene Symbol: LOC661291] [Locus Tag: ] [Chromosome: LG3] [Map Location: ] [Description: midasin] [Gene Type: protein-coding]	LOC661291; Mdn1
338	NC_007418.3	18694623	SNV	G	C	Heterozygous	10	22	45.45	1	7	3	0.3	38	10	23	7	9	1.19	0.36	0.52	no	C/G	No	1	78.86	XP_972555.3:c.13094C>G	XP_972555.3:p.Thr4365Ser	LOC661291	661291		661291 [Gene Symbol: LOC661291] [Locus Tag: ] [Chromosome: LG3] [Map Location: ] [Description: midasin] [Gene Type: protein-coding]	LOC661291; Mdn1
339	NC_007418.3	18888816	SNV	C	G	Homozygous	21	21	100	1	12	12	0.5	37.14	24	24	12	13		1	1	no	G/G	No	1	83.1	XP_972302.1:c.609C>G	XP_972302.1:p.Asp203Glu	LOC661019	661019		661019 [Gene Symbol: LOC661019] [Locus Tag: ] [Chromosome: LG3] [Map Location: ] [Description: longitudinals lacking protein, isoforms H/M/V] [Gene Type: protein-coding]	LOC661019
340	NC_007418.3	19297727	SNV	C	T	Heterozygous	13	24	54.17	1	11	3	0.21	37.69	14	28	7	9	0.43	0.7	1	no	C/T	No	1	87.34	XP_970835.1:c.1013C>T	XP_970835.1:p.Pro338Leu	LOC659438	659438		659438 [Gene Symbol: LOC659438] [Locus Tag: TcasGA2_TC011192] [Chromosome: LG3] [Map Location: ] [Description: retinal dehydrogenase 1] [Gene Type: protein-coding]	TcasGA2_TC011192; LOC659438
341	NC_007418.3	19300220	SNV	C	T	Heterozygous	16	21	76.19	0.99	0	16	0	37.94	16	22	7	7	-0.17	0.93	0.52	no	C/T	No	1	19.2	XP_970708.2:c.1328G>A	XP_970708.2:p.Arg443Lys	LOC659296	659296		659296 [Gene Symbol: LOC659296] [Locus Tag: TcasGA2_TC011302] [Chromosome: LG3] [Map Location: ] [Description: YEATS domain-containing protein 2] [Gene Type: protein-coding]	TcasGA2_TC011302; LOC659296
342	NC_007418.3	19302587	SNV	C	T	Heterozygous	16	21	76.19	0.99	6	10	0.38	38.25	16	24	9	11	2.11	0.92	1	no	C/T	No	1	19.17	XP_970708.2:c.364G>A	XP_970708.2:p.Val122Ile	LOC659296	659296		659296 [Gene Symbol: LOC659296] [Locus Tag: TcasGA2_TC011302] [Chromosome: LG3] [Map Location: ] [Description: YEATS domain-containing protein 2] [Gene Type: protein-coding]	TcasGA2_TC011302; LOC659296
343	NC_007418.3	19304812	SNV	A	T	Heterozygous	15	28	53.57	1	5	11	0.31	35.8	16	29	8	9	0.37	0.38	0.93	no	A/T	No	1	100.32	XP_970641.1:c.226A>T	XP_970641.1:p.Thr76Ser	LOC659223	659223		659223 [Gene Symbol: LOC659223] [Locus Tag: TcasGA2_TC011193] [Chromosome: LG3] [Map Location: ] [Description: asparagine--tRNA ligase, cytoplasmic] [Gene Type: protein-coding]	TcasGA2_TC011193; LOC659223
344	NC_007418.3	19304828	SNV	G	A	Homozygous	25	25	100	1	18	13	0.42	37.16	31	31	16	19		1	1	no	A/A	No	1	96.74	XP_970641.1:c.242G>A	XP_970641.1:p.Ser81Asn	LOC659223	659223		659223 [Gene Symbol: LOC659223] [Locus Tag: TcasGA2_TC011193] [Chromosome: LG3] [Map Location: ] [Description: asparagine--tRNA ligase, cytoplasmic] [Gene Type: protein-coding]	TcasGA2_TC011193; LOC659223
345	NC_007418.3	19304888	SNV	C	A	Heterozygous	10	25	40	1	5	5	0.5	38.2	10	26	7	8	-1.11	0.35	0.93	no	A/C	No	1	66.98	XP_970641.1:c.302C>A	XP_970641.1:p.Thr101Lys	LOC659223	659223		659223 [Gene Symbol: LOC659223] [Locus Tag: TcasGA2_TC011193] [Chromosome: LG3] [Map Location: ] [Description: asparagine--tRNA ligase, cytoplasmic] [Gene Type: protein-coding]	TcasGA2_TC011193; LOC659223
346	NC_007418.3	19304899	SNV	C	A	Heterozygous	12	27	44.44	1	5	8	0.38	37.75	13	30	8	9	-0.32	0.69	0.99	no	A/C	No	1	86.9	XP_970641.1:c.313C>A	XP_970641.1:p.Leu105Ile	LOC659223	659223		659223 [Gene Symbol: LOC659223] [Locus Tag: TcasGA2_TC011193] [Chromosome: LG3] [Map Location: ] [Description: asparagine--tRNA ligase, cytoplasmic] [Gene Type: protein-coding]	TcasGA2_TC011193; LOC659223
347	NC_007418.3	19305047	SNV	G	T	Heterozygous	6	27	22.22	0.92	0	6	0	39.83	6	29	2	2	1.05	0.29	0.22	no	G/T	No	1	10.9	XP_970641.1:c.461G>T	XP_970641.1:p.Gly154Val	LOC659223	659223		659223 [Gene Symbol: LOC659223] [Locus Tag: TcasGA2_TC011193] [Chromosome: LG3] [Map Location: ] [Description: asparagine--tRNA ligase, cytoplasmic] [Gene Type: protein-coding]	TcasGA2_TC011193; LOC659223
348	NC_007418.3	19308666	SNV	C	G	Heterozygous	12	21	57.14	1	10	3	0.23	38.25	13	23	7	9	-0.28	0.85	0.97	no	C/G	No	1	68.88	XP_008194457.1:c.818C>G	XP_008194457.1:p.Pro273Arg	LOC103313294	103313294		103313294 [Gene Symbol: LOC103313294] [Locus Tag: TcasGA2_TC011194] [Chromosome: LG3] [Map Location: LG10|LG3] [Description: uncharacterized LOC103313294] [Gene Type: protein-coding]	LOC103313294; TcasGA2_TC011194
349	NC_007418.3	19308671	SNV	G	A	Heterozygous	13	21	61.9	1	11	3	0.21	39.23	14	23	8	10	-0.87	0.85	0.99	no	A/G	No	1	57.24	XP_008194457.1:c.823G>A	XP_008194457.1:p.Glu275Lys	LOC103313294	103313294		103313294 [Gene Symbol: LOC103313294] [Locus Tag: TcasGA2_TC011194] [Chromosome: LG3] [Map Location: LG10|LG3] [Description: uncharacterized LOC103313294] [Gene Type: protein-coding]	LOC103313294; TcasGA2_TC011194
350	NC_007418.3	19309676	SNV	G	C	Heterozygous	15	20	75	0.99	5	10	0.33	35.53	15	20	10	10	-1.4	0.72	0.99	no	C/G	No	1	20.65	XP_008194457.1:c.1584G>C	XP_008194457.1:p.Met528Ile	LOC103313294	103313294		103313294 [Gene Symbol: LOC103313294] [Locus Tag: TcasGA2_TC011194] [Chromosome: LG3] [Map Location: LG10|LG3] [Description: uncharacterized LOC103313294] [Gene Type: protein-coding]	LOC103313294; TcasGA2_TC011194
351	NC_007418.3	19309701	SNV	T	C	Heterozygous	17	26	65.38	1	3	14	0.18	37.71	17	26	12	12	-0.4	0.58	0.64	no	C/T	No	1	54.94	XP_008194457.1:c.1609T>C	XP_008194457.1:p.Phe537Leu	LOC103313294	103313294		103313294 [Gene Symbol: LOC103313294] [Locus Tag: TcasGA2_TC011194] [Chromosome: LG3] [Map Location: LG10|LG3] [Description: uncharacterized LOC103313294] [Gene Type: protein-coding]	LOC103313294; TcasGA2_TC011194
352	NC_007418.3	19309728	SNV	G	T	Heterozygous	16	29	55.17	1	3	13	0.19	37.62	16	29	8	12	0.22	0.7	0.46	no	G/T	No	1	98.42	XP_008194457.1:c.1636G>T	XP_008194457.1:p.Val546Leu	LOC103313294	103313294		103313294 [Gene Symbol: LOC103313294] [Locus Tag: TcasGA2_TC011194] [Chromosome: LG3] [Map Location: LG10|LG3] [Description: uncharacterized LOC103313294] [Gene Type: protein-coding]	LOC103313294; TcasGA2_TC011194
353	NC_007418.3	19309850	SNV	C	G	Heterozygous	12	22	54.55	1	6	8	0.43	39	14	26	8	9	-0.73	0.71	1	no	C/G	No	1	78.85	XP_008194457.1:c.1758C>G	XP_008194457.1:p.Asn586Lys	LOC103313294	103313294		103313294 [Gene Symbol: LOC103313294] [Locus Tag: TcasGA2_TC011194] [Chromosome: LG3] [Map Location: LG10|LG3] [Description: uncharacterized LOC103313294] [Gene Type: protein-coding]	LOC103313294; TcasGA2_TC011194
354	NC_007418.3	19309852	SNV	G	A	Heterozygous	17	24	70.83	1	8	13	0.38	39.06	21	28	11	13	0.16	0.79	1	no	A/G	No	1	36.16	XP_008194457.1:c.1760G>A	XP_008194457.1:p.Arg587Gln	LOC103313294	103313294		103313294 [Gene Symbol: LOC103313294] [Locus Tag: TcasGA2_TC011194] [Chromosome: LG3] [Map Location: LG10|LG3] [Description: uncharacterized LOC103313294] [Gene Type: protein-coding]	LOC103313294; TcasGA2_TC011194
355	NC_007418.3	19309857	SNV	C	G	Heterozygous	17	24	70.83	1	8	11	0.42	38.65	19	26	10	12	0.1	0.96	1	no	C/G	No	1	40.54	XP_008194457.1:c.1765C>G	XP_008194457.1:p.Arg589Gly	LOC103313294	103313294		103313294 [Gene Symbol: LOC103313294] [Locus Tag: TcasGA2_TC011194] [Chromosome: LG3] [Map Location: LG10|LG3] [Description: uncharacterized LOC103313294] [Gene Type: protein-coding]	LOC103313294; TcasGA2_TC011194
356	NC_007418.3	19309863..19309864	MNV	GA	CC	Heterozygous	18	25	72	1	7	14	0.33	38.75	21	30	13	16	0.01	0.88	1	no	complex	No	1	200	XP_008194457.1:c.1771_1772delGAinsCC	XP_008194457.1:p.Glu591Pro	LOC103313294	103313294		103313294 [Gene Symbol: LOC103313294] [Locus Tag: TcasGA2_TC011194] [Chromosome: LG3] [Map Location: LG10|LG3] [Description: uncharacterized LOC103313294] [Gene Type: protein-coding]	LOC103313294; TcasGA2_TC011194
357	NC_007418.3	19320293	SNV	T	A	Heterozygous	21	27	77.78	0.96	12	9	0.43	37.19	21	29	9	12	0.55	0.82	1	no	A/T	No	1	14.16	XP_008194419.1:c.1588A>T	XP_008194419.1:p.Asn530Tyr	LOC103313283	103313283		103313283 [Gene Symbol: LOC103313283] [Locus Tag: TcasGA2_TC031363] [Chromosome: LG3] [Map Location: LG10|LG3] [Description: uncharacterized LOC103313283] [Gene Type: protein-coding]	LOC103313283; TcasGA2_TC031363
358	NC_007418.3	19917236..19917237	MNV	AT	TC	Homozygous	25	25	100	1	14	11	0.44	38.55	25	25	9	16		1	1	no	TC/TC	No	1	200	XP_008193899.1:c.[1160_1161delATinsTC]; XP_967203.1:c.[1205_1206delATinsTC]	XP_008193899.1:p.[Tyr387Phe]; XP_967203.1:p.[Tyr402Phe]	LOC655557	655557		655557 [Gene Symbol: LOC655557] [Locus Tag: TcasGA2_TC002133] [Chromosome: LG3] [Map Location: ] [Description: protein arginine N-methyltransferase 7] [Gene Type: protein-coding]	LOC655557; TcasGA2_TC002133
359	NC_007418.3	20303450	Deletion	C	-	Heterozygous	5	20	25	0.99	1	4	0.2	38.6	5	20	4	4	0.35	0.63	0.7	no	-/C	No	1	19.96	XP_015833909.1:c.118delC	XP_015833909.1:p.Gln40fs	LOC103313207	103313207		103313207 [Gene Symbol: LOC103313207] [Locus Tag: TcasGA2_TC032609] [Chromosome: LG3] [Map Location: ] [Description: uncharacterized LOC103313207] [Gene Type: protein-coding]	LOC103313207; TcasGA2_TC032609
360	NC_007418.3	20381956	SNV	A	G	Homozygous	20	20	100	1	16	7	0.3	37.5	23	23	9	13		1	1	no	G/G	No	1	80.09	XP_008194055.1:c.[706A>G]; XP_008194070.1:c.[746-6744T>C]; XP_015833856.1:c.[746-6744T>C]	XP_008194055.1:p.Asn236Asp	LOC657445, LOC657603	657445 , 657603		657445 [Gene Symbol: LOC657445] [Locus Tag: TcasGA2_TC002113] [Chromosome: LG3] [Map Location: ] [Description: ALK tyrosine kinase receptor] [Gene Type: protein-coding] || 657603 [Gene Symbol: LOC657603] [Locus Tag: TcasGA2_TC002148] [Chromosome: LG3] [Map Location: ] [Description: inactive peptidyl-prolyl cis-trans isomerase shutdown] [Gene Type: protein-coding]	LOC657445; TcasGA2_TC002113 || LOC657603; TcasGA2_TC002148
361	NC_007418.3	22248538	SNV	G	A	Homozygous	21	21	100	1	15	6	0.29	37.52	21	21	12	15		1	1	no	A/A	No	1	84.7	XP_008191352.1:c.[944G>A]; XP_008191351.1:c.[944G>A]	XP_008191352.1:p.[Ser315Asn]; XP_008191351.1:p.[Ser315Asn]	LOC656254	656254		656254 [Gene Symbol: LOC656254] [Locus Tag: TcasGA2_TC003827] [Chromosome: LG3] [Map Location: ] [Description: zinc finger autosomal protein] [Gene Type: protein-coding]	LOC656254; TcasGA2_TC003827
362	NC_007418.3	23045504	SNV	G	A	Homozygous	22	22	100	1	17	9	0.35	36.36	26	26	10	15		1	1	no	A/A	No	1	87.71	XP_015833932.1:c.[3521C>T]; XP_015833933.1:c.[3467C>T]; XP_015833934.1:c.[3521C>T]; XP_015833931.1:c.[3521C>T]; XP_015833935.1:c.[3521C>T]	XP_015833932.1:p.[Ala1174Val]; XP_015833933.1:p.[Ala1156Val]; XP_015833934.1:p.[Ala1174Val]; XP_015833931.1:p.[Ala1174Val]; XP_015833935.1:p.[Ala1174Val]	LOC656419	656419		656419 [Gene Symbol: LOC656419] [Locus Tag: TcasGA2_TC002571] [Chromosome: LG3] [Map Location: ] [Description: protein dopey-1 homolog] [Gene Type: protein-coding]	LOC656419; TcasGA2_TC002571
363	NC_007418.3	24201585	SNV	A	G	Heterozygous	9	29	31.03	1	7	3	0.3	37.56	10	33	7	8	-2.12	0.67	0.74	no	A/G	No	1	37.78	NP_001159495.1:c.[487+1385T>C]; XP_008198962.1:c.[1412T>C]	XP_008198962.1:p.Ile471Thr	Lyz, LOC103314494	658610 , 103314494	lysozyme	658610 [Gene Symbol: Lyz] [Locus Tag: ] [Chromosome: LG3] [Map Location: ] [Description: lysozyme] [Gene Type: protein-coding] || 103314494 [Gene Symbol: LOC103314494] [Locus Tag: ] [Chromosome: LG3] [Map Location: ] [Description: sensory neuron membrane protein 2] [Gene Type: protein-coding]	Lyz; TC010350; TC010351; TC010352 || LOC103314494
364	NC_007418.3	24202996	SNV	G	A	Heterozygous	10	29	34.48	1	7	6	0.46	39.1	13	37	6	6	0.67	0.49	0.97	no	A/G	No	1	59.39	XP_008198962.1:c.[1103-431C>T]; NP_001159495.1:c.[461C>T]	NP_001159495.1:p.Thr154Ile	Lyz, LOC103314494	658610 , 103314494	lysozyme	658610 [Gene Symbol: Lyz] [Locus Tag: ] [Chromosome: LG3] [Map Location: ] [Description: lysozyme] [Gene Type: protein-coding] || 103314494 [Gene Symbol: LOC103314494] [Locus Tag: ] [Chromosome: LG3] [Map Location: ] [Description: sensory neuron membrane protein 2] [Gene Type: protein-coding]	Lyz; TC010350; TC010351; TC010352 || LOC103314494
365	NC_007418.3	24203111	SNV	C	T	Heterozygous	14	33	42.42	1	2	14	0.12	38.93	16	37	9	10	0.09	0.8	0.93	no	C/T	No	1	99.04	XP_008198962.1:c.[1103-546G>A]; NP_001159495.1:c.[346G>A]	NP_001159495.1:p.Gly116Ser	Lyz, LOC103314494	658610 , 103314494	lysozyme	658610 [Gene Symbol: Lyz] [Locus Tag: ] [Chromosome: LG3] [Map Location: ] [Description: lysozyme] [Gene Type: protein-coding] || 103314494 [Gene Symbol: LOC103314494] [Locus Tag: ] [Chromosome: LG3] [Map Location: ] [Description: sensory neuron membrane protein 2] [Gene Type: protein-coding]	Lyz; TC010350; TC010351; TC010352 || LOC103314494
366	NC_007418.3	24203131	SNV	T	C	Heterozygous	6	26	23.08	0.98	1	6	0.14	38.5	7	28	4	5	-1.1	0.95	0.99	no	C/T	No	1	18.04	NP_001159495.1:c.[326A>G]; XP_008198962.1:c.[1103-566A>G]	NP_001159495.1:p.Lys109Arg	Lyz, LOC103314494	658610 , 103314494	lysozyme	658610 [Gene Symbol: Lyz] [Locus Tag: ] [Chromosome: LG3] [Map Location: ] [Description: lysozyme] [Gene Type: protein-coding] || 103314494 [Gene Symbol: LOC103314494] [Locus Tag: ] [Chromosome: LG3] [Map Location: ] [Description: sensory neuron membrane protein 2] [Gene Type: protein-coding]	Lyz; TC010350; TC010351; TC010352 || LOC103314494
367	NC_007418.3	24203135	SNV	A	C	Heterozygous	8	27	29.63	1	1	8	0.11	39.88	9	29	5	6	1.41	0.38	0.8	no	A/C	No	1	40.26	NP_001159495.1:c.[322T>G]; XP_008198962.1:c.[1103-570T>G]	NP_001159495.1:p.Phe108Val	Lyz, LOC103314494	658610 , 103314494	lysozyme	658610 [Gene Symbol: Lyz] [Locus Tag: ] [Chromosome: LG3] [Map Location: ] [Description: lysozyme] [Gene Type: protein-coding] || 103314494 [Gene Symbol: LOC103314494] [Locus Tag: ] [Chromosome: LG3] [Map Location: ] [Description: sensory neuron membrane protein 2] [Gene Type: protein-coding]	Lyz; TC010350; TC010351; TC010352 || LOC103314494
368	NC_007418.3	24203157	SNV	G	T	Heterozygous	10	24	41.67	1	0	10	0	38.2	10	24	6	8	-1.11	0.27	0.3	no	G/T	No	1	69.95	NP_001159495.1:c.[300C>A]; XP_008198962.1:c.[1103-592C>A]	NP_001159495.1:p.Asp100Glu	Lyz, LOC103314494	658610 , 103314494	lysozyme	658610 [Gene Symbol: Lyz] [Locus Tag: ] [Chromosome: LG3] [Map Location: ] [Description: lysozyme] [Gene Type: protein-coding] || 103314494 [Gene Symbol: LOC103314494] [Locus Tag: ] [Chromosome: LG3] [Map Location: ] [Description: sensory neuron membrane protein 2] [Gene Type: protein-coding]	Lyz; TC010350; TC010351; TC010352 || LOC103314494
369	NC_007418.3	25105251	SNV	C	T	Heterozygous	24	34	70.59	1	8	18	0.31	39.12	26	36	14	16	2.14	0.81	0.77	no	C/T	No	1	46.77	XP_015833997.1:c.1259C>T	XP_015833997.1:p.Ala420Val	LOC103314489	103314489		103314489 [Gene Symbol: LOC103314489] [Locus Tag: TcasGA2_TC010385] [Chromosome: LG3] [Map Location: ] [Description: sodium-dependent neutral amino acid transporter B(0)AT2] [Gene Type: protein-coding]	TcasGA2_TC010385; LOC103314489
370	NC_007418.3	25623535	SNV	C	A	Homozygous	25	25	100	1	10	21	0.32	38.92	31	31	12	14		1	1	no	A/A	No	1	96.73	XP_008191393.1:c.[5708C>A]; XP_008191391.1:c.[5810C>A]; XP_015834046.1:c.[3178-2165C>A]	XP_008191393.1:p.[Thr1903Lys]; XP_008191391.1:p.[Thr1937Lys]	LOC656175	656175		656175 [Gene Symbol: LOC656175] [Locus Tag: TcasGA2_TC003876] [Chromosome: LG3] [Map Location: ] [Description: chitinase 6] [Gene Type: protein-coding]	LOC656175; TcasGA2_TC003876; GLEAN_03876; Cht6
371	NC_007418.3	25908694	SNV	T	C	Homozygous	28	28	100	1	18	14	0.44	37.07	32	32	17	19		1	1	no	C/C	No	1	104.19	XP_015834034.1:c.925A>G	XP_015834034.1:p.Arg309Gly	LOC656565, LOC657482	656565 , 657482		656565 [Gene Symbol: LOC656565] [Locus Tag: TcasGA2_TC002522] [Chromosome: LG3] [Map Location: ] [Description: tyrosine-protein kinase Src64B] [Gene Type: protein-coding] || 657482 [Gene Symbol: LOC657482] [Locus Tag: TcasGA2_TC002520] [Chromosome: LG3] [Map Location: ] [Description: sodium-coupled monocarboxylate transporter 2] [Gene Type: protein-coding]	LOC656565; TcasGA2_TC002522 || TcasGA2_TC002520; LOC657482
372	NC_007418.3	26454800	SNV	T	G	Homozygous	25	25	100	1	15	14	0.48	35.72	29	29	12	18		1	1	no	G/G	No	1	95.13	XP_008191438.1:c.[3490A>C]; XP_015834049.1:c.[3286A>C]; XP_008191437.1:c.[3490A>C]	XP_008191438.1:p.[Asn1164His]; XP_015834049.1:p.[Asn1096His]; XP_008191437.1:p.[Asn1164His]	LOC659451	659451		659451 [Gene Symbol: LOC659451] [Locus Tag: TcasGA2_TC002498] [Chromosome: LG3] [Map Location: ] [Description: dual oxidase] [Gene Type: protein-coding]	TcasGA2_TC002498; LOC659451
373	NC_007418.3	27489049	SNV	C	T	Heterozygous	7	20	35	1	2	6	0.25	37.71	8	21	4	5	-0.75	0.2	0.68	no	C/T	No	1	46.26	XP_015834065.1:c.[560G>A]; XP_008199102.1:c.[560G>A]	XP_015834065.1:p.[Arg187His]; XP_008199102.1:p.[Arg187His]	LOC657013	657013		657013 [Gene Symbol: LOC657013] [Locus Tag: TcasGA2_TC002482] [Chromosome: LG3] [Map Location: ] [Description: otoferlin] [Gene Type: protein-coding]	LOC657013; TcasGA2_TC002482
374	NC_007418.3	27826061	SNV	A	C	Homozygous	21	21	100	1	15	7	0.32	35.52	22	22	10	14		1	1	no	C/C	No	1	80.11	XP_967329.1:c.259T>G	XP_967329.1:p.Ser87Ala	LOC655674	655674		655674 [Gene Symbol: LOC655674] [Locus Tag: TcasGA2_TC002471] [Chromosome: LG3] [Map Location: ] [Description: sulfhydryl oxidase 2] [Gene Type: protein-coding]	TcasGA2_TC002471; LOC655674
375	NC_007418.3	27826253	SNV	T	C	Homozygous	20	20	100	1	14	8	0.36	35.65	22	22	9	14		1	1	no	C/C	No	1	80.11	XP_967329.1:c.67A>G	XP_967329.1:p.Ile23Val	LOC655674	655674		655674 [Gene Symbol: LOC655674] [Locus Tag: TcasGA2_TC002471] [Chromosome: LG3] [Map Location: ] [Description: sulfhydryl oxidase 2] [Gene Type: protein-coding]	TcasGA2_TC002471; LOC655674
376	NC_007418.3	27920471	SNV	G	A	Homozygous	24	24	100	1	17	8	0.32	37.71	25	25	11	12		1	1	no	A/A	No	1	93.73	XP_015834159.1:c.[692+12695G>A]; XP_015834116.1:c.[692+12695G>A]; XP_015834130.1:c.[692+12695G>A]; XP_015834149.1:c.[692+12695G>A]; XP_015834154.1:c.[692+12695G>A]; XP_015834119.1:c.[693-226G>A]; XP_015834136.1:c.[693-6725G>A]; XP_015834114.1:c.[692+12695G>A]; XP_015834135.1:c.[1453G>A]; XP_015834138.1:c.[692+12695G>A]; XP_015834125.1:c.[692+12695G>A]; XP_015834126.1:c.[692+12695G>A]; XP_01583414…	XP_015834135.1:p.Glu485Lys	LOC656007	656007		656007 [Gene Symbol: LOC656007] [Locus Tag: TcasGA2_TC003945] [Chromosome: LG3] [Map Location: LG3|LG3] [Description: zinc finger protein OZF] [Gene Type: protein-coding]	TcasGA2_TC003945; grauzone; grau; LOC656007
377	NC_007418.3	27925741	SNV	T	C	Homozygous	20	20	100	1	15	5	0.25	37.95	20	20	12	15		1	1	no	C/C	No	1	80.12	XP_015834155.1:c.[693-7074T>C]; XP_015834142.1:c.[692+17965T>C]; XP_015834130.1:c.[692+17965T>C]; XP_015834140.1:c.[692+17965T>C]; XP_015834159.1:c.[692+17965T>C]; XP_015834143.1:c.[692+17965T>C]; XP_015834114.1:c.[692+17965T>C]; XP_015834122.1:c.[692+17965T>C]; XP_015834151.1:c.[693-17669T>C]; XP_015834120.1:c.[693-4483T>C]; XP_015834165.1:c.[693-535T>C]; XP_015834154.1:c.[692+17965T>C]; XP_0158…	XP_015834164.1:p.Ile388Thr	LOC656007	656007		656007 [Gene Symbol: LOC656007] [Locus Tag: TcasGA2_TC003945] [Chromosome: LG3] [Map Location: LG3|LG3] [Description: zinc finger protein OZF] [Gene Type: protein-coding]	TcasGA2_TC003945; grauzone; grau; LOC656007
378	NC_007418.3	27935842	SNV	G	A	Homozygous	21	21	100	1	13	11	0.46	39.43	24	24	10	14		1	1	no	A/A	No	1	84.69	XP_015834154.1:c.[693-27979G>A]; XP_015834114.1:c.[692+28066G>A]; XP_015834161.1:c.[693-23224G>A]; XP_015834123.1:c.[692+28066G>A]; XP_015834145.1:c.[693-1620G>A]; XP_015834142.1:c.[693-10911G>A]; XP_015834147.1:c.[1416G>A]; XP_015834129.1:c.[692+28066G>A]; XP_015834140.1:c.[692+28066G>A]; XP_015834115.1:c.[692+28066G>A]; XP_015834126.1:c.[692+28066G>A]; XP_015834138.1:c.[692+28066G>A]; XP_015834…	XP_015834147.1:p.[Met472Ile]; XP_015834155.1:p.[Met470Ile]	LOC656007	656007		656007 [Gene Symbol: LOC656007] [Locus Tag: TcasGA2_TC003945] [Chromosome: LG3] [Map Location: LG3|LG3] [Description: zinc finger protein OZF] [Gene Type: protein-coding]	TcasGA2_TC003945; grauzone; grau; LOC656007
379	NC_007418.3	27977105	SNV	T	C	Homozygous	22	22	100	1	18	5	0.22	38.18	23	23	12	14		1	1	no	C/C	No	1	86.13	XP_015834156.1:c.[693-3188T>C]; XP_015834116.1:c.[693-37780T>C]; XP_015834162.1:c.[693-24514T>C]; XP_015834138.1:c.[693-22200T>C]; XP_015834152.1:c.[693-7458T>C]; XP_015834124.1:c.[693-13585T>C]; XP_015834114.1:c.[693-18124T>C]; XP_015834125.1:c.[693-26922T>C]; XP_015834140.1:c.[693-5936T>C]; XP_015834157.1:c.[693-2177T>C]; XP_015834143.1:c.[791T>C]; XP_015834127.1:c.[693-10509T>C]; XP_015834115.…	XP_015834143.1:p.Val264Ala	LOC656007	656007		656007 [Gene Symbol: LOC656007] [Locus Tag: TcasGA2_TC003945] [Chromosome: LG3] [Map Location: LG3|LG3] [Description: zinc finger protein OZF] [Gene Type: protein-coding]	TcasGA2_TC003945; grauzone; grau; LOC656007
380	NC_007418.3	27999748	SNV	C	A	Homozygous	21	21	100	1	1	20	0.05	38.1	21	21	8	10		1	1	no	A/A	No	1	84.69	XP_015834162.1:c.[693-1871C>A]; XP_015834130.1:c.[693-8156C>A]; XP_015834116.1:c.[693-15137C>A]; XP_015834115.1:c.[693-18643C>A]; XP_015834138.1:c.[1136C>A]; XP_015834125.1:c.[693-4279C>A]; XP_015834121.1:c.[693-26254C>A]; XP_015834123.1:c.[693-11623C>A]	XP_015834138.1:p.Thr379Lys	LOC656007	656007		656007 [Gene Symbol: LOC656007] [Locus Tag: TcasGA2_TC003945] [Chromosome: LG3] [Map Location: LG3|LG3] [Description: zinc finger protein OZF] [Gene Type: protein-coding]	TcasGA2_TC003945; grauzone; grau; LOC656007
381	NC_007418.3	28030986..28030987	MNV	CT	GC	Homozygous	26	26	100	1	6	22	0.21	35.77	28	28	11	16		1	1	no	GC/GC	No	1	200	XP_968354.1:c.2784_2785delAGinsGC	XP_968354.1:p.Ala929Pro	LOC656754	656754		656754 [Gene Symbol: LOC656754] [Locus Tag: TcasGA2_TC002467] [Chromosome: LG3] [Map Location: ] [Description: lysosomal alpha-mannosidase] [Gene Type: protein-coding]	LOC656754; TcasGA2_TC002467
382	NC_007418.3	28031943	SNV	T	C	Homozygous	24	24	100	1	11	15	0.42	38.67	26	26	18	20		1	1	no	C/C	No	1	92.15	XP_968354.1:c.1966A>G	XP_968354.1:p.Asn656Asp	LOC656754	656754		656754 [Gene Symbol: LOC656754] [Locus Tag: TcasGA2_TC002467] [Chromosome: LG3] [Map Location: ] [Description: lysosomal alpha-mannosidase] [Gene Type: protein-coding]	LOC656754; TcasGA2_TC002467
383	NC_007418.3	28054367	SNV	T	C	Homozygous	23	23	100	1	17	15	0.47	38.65	32	32	14	14		1	1	no	C/C	No	1	89.14	XP_968596.1:c.1559A>G	XP_968596.1:p.Asn520Ser	LOC657014	657014		657014 [Gene Symbol: LOC657014] [Locus Tag: TcasGA2_TC002464] [Chromosome: LG3] [Map Location: ] [Description: lysosomal alpha-mannosidase] [Gene Type: protein-coding]	TcasGA2_TC002464; LOC657014
384	NC_007418.3	28175126	SNV	T	C	Heterozygous	5	20	25	0.99	5	3	0.38	37.6	8	30	4	5	0.57	0.68	0.99	no	C/T	No	1	21.85	XP_015834174.1:c.[8648T>C]; XP_015834178.1:c.[8258T>C]; XP_015834170.1:c.[8741T>C]; XP_015834181.1:c.[5764+5068T>C]; XP_015834180.1:c.[4829T>C]; XP_015834179.1:c.[8168T>C]; XP_015834171.1:c.[8723T>C]; XP_008200060.1:c.[8141T>C]; XP_015834172.1:c.[8714T>C]; XP_015834175.1:c.[8291T>C]; XP_015834177.1:c.[8267T>C]; XP_015834173.1:c.[8651T>C]; XP_015834176.1:c.[8285T>C]	XP_015834174.1:p.[Ile2883Thr]; XP_015834178.1:p.[Ile2753Thr]; XP_015834170.1:p.[Ile2914Thr]; XP_015834180.1:p.[Ile1610Thr]; XP_015834179.1:p.[Ile2723Thr]; XP_015834171.1:p.[Ile2908Thr]; XP_008200060.1:p.[Ile2714Thr]; XP_015834172.1:p.[Ile2905Thr]; XP_015834175.1:p.[Ile2764Thr]; XP_015834177.1:p.[Ile2756Thr]; XP_015834173.1:p.[Ile2884Thr]; XP_015834176.1:p.[Ile2762Thr]	LOC100142605	100142605		100142605 [Gene Symbol: LOC100142605] [Locus Tag: TcasGA2_TC003960] [Chromosome: LG3] [Map Location: LG3|LG3] [Description: ankyrin-3] [Gene Type: protein-coding]	TcasGA2_TC003960; LOC100142605
385	NC_007418.3	28186092	SNV	C	T	Homozygous	25	25	100	1	7	21	0.25	37.36	28	28	15	18		1	1	no	T/T	No	1	96.74	XP_015834179.1:c.[18011C>T]; XP_015834176.1:c.[18128C>T]; XP_008200060.1:c.[17984C>T]; XP_015834180.1:c.[14672C>T]; XP_015834177.1:c.[18110C>T]; XP_015834173.1:c.[18494C>T]; XP_015834181.1:c.[9992C>T]; XP_015834170.1:c.[18584C>T]; XP_015834175.1:c.[18134C>T]; XP_015834178.1:c.[18101C>T]; XP_015834172.1:c.[18557C>T]; XP_015834171.1:c.[18566C>T]; XP_015834174.1:c.[18491C>T]	XP_015834179.1:p.[Pro6004Leu]; XP_015834176.1:p.[Pro6043Leu]; XP_008200060.1:p.[Pro5995Leu]; XP_015834180.1:p.[Pro4891Leu]; XP_015834177.1:p.[Pro6037Leu]; XP_015834173.1:p.[Pro6165Leu]; XP_015834181.1:p.[Pro3331Leu]; XP_015834170.1:p.[Pro6195Leu]; XP_015834175.1:p.[Pro6045Leu]; XP_015834178.1:p.[Pro6034Leu]; XP_015834172.1:p.[Pro6186Leu]; XP_015834171.1:p.[Pro6189Leu]; XP_015834174.1:p.[Pro6164Le…	LOC100142605	100142605		100142605 [Gene Symbol: LOC100142605] [Locus Tag: TcasGA2_TC003960] [Chromosome: LG3] [Map Location: LG3|LG3] [Description: ankyrin-3] [Gene Type: protein-coding]	TcasGA2_TC003960; LOC100142605
386	NC_007418.3	28743143	SNV	A	T	Homozygous	20	22	90.91	1	10	12	0.45	39.55	22	24	12	14		0.99	1	no	T/T	No	1	26.42	XP_008191505.1:c.1739A>T	XP_008191505.1:p.Gln580Leu	LOC103312505	103312505		103312505 [Gene Symbol: LOC103312505] [Locus Tag: TcasGA2_TC002420] [Chromosome: LG3] [Map Location: ] [Description: zinc finger protein 320] [Gene Type: protein-coding]	TcasGA2_TC002420; LOC103312505
387	NC_007418.3	28755662	SNV	A	T	Heterozygous	10	24	41.67	1	8	2	0.2	38.1	10	24	3	6	-1.79	0.32	0.94	no	A/T	No	1	73.43	XP_008191502.1:c.654A>T	XP_008191502.1:p.Gln218His	LOC661541	661541		661541 [Gene Symbol: LOC661541] [Locus Tag: TcasGA2_TC002423] [Chromosome: LG3] [Map Location: ] [Description: brefeldin A-inhibited guanine nucleotide-exchange protein 1] [Gene Type: protein-coding]	LOC661541; TcasGA2_TC002423
388	NC_007418.3	28763160	SNV	A	G	Heterozygous	18	23	78.26	0.95	13	8	0.38	38	21	26	13	14	1.3	0.82	0.89	no	A/G	No	1	12.75	XP_008191502.1:c.1627A>G	XP_008191502.1:p.Ile543Val	LOC661541	661541		661541 [Gene Symbol: LOC661541] [Locus Tag: TcasGA2_TC002423] [Chromosome: LG3] [Map Location: ] [Description: brefeldin A-inhibited guanine nucleotide-exchange protein 1] [Gene Type: protein-coding]	LOC661541; TcasGA2_TC002423
389	NC_007418.3	28791926	SNV	G	A	Homozygous	22	22	100	1	13	14	0.48	38.86	27	27	13	14		1	1	no	A/A	No	1	87.7	XP_966589.1:c.1460G>A	XP_966589.1:p.Gly487Glu	LOC659553	659553		659553 [Gene Symbol: LOC659553] [Locus Tag: TcasGA2_TC002426] [Chromosome: LG3] [Map Location: ] [Description: kelch domain-containing protein 4] [Gene Type: protein-coding]	LOC659553; TcasGA2_TC002426
390	NC_007418.3	28932375	SNV	T	C	Homozygous	20	20	100	1	15	8	0.35	37.7	23	23	13	13		1	1	no	C/C	No	1	80.12	XP_015834218.1:c.640T>C	XP_015834218.1:p.Tyr214His	LOC107397694	107397694		107397694 [Gene Symbol: LOC107397694] [Locus Tag: ] [Chromosome: LG3] [Map Location: ] [Description: uncharacterized LOC107397694] [Gene Type: protein-coding]	LOC107397694
391	NC_007418.3	29019974..29019975	MNV	GA	AG	Homozygous	25	25	100	1	16	16	0.5	38.64	32	32	15	19		1	1	no	AG/AG	No	1	200	XP_015834201.1:c.[38274_38275delTCinsCT]; XP_015834202.1:c.[36304+2330_36304+2331delTCinsCT]; XP_015834190.1:c.[38169_38170delTCinsCT]; XP_015834196.1:c.[30867_30868delTCinsCT]; XP_015834189.1:c.[38262_38263delTCinsCT]; XP_015834192.1:c.[38274_38275delTCinsCT]; XP_015834195.1:c.[35658_35659delTCinsCT]; XP_015834200.1:c.[26844_26845delTCinsCT]; XP_015834197.1:c.[36304+2330_36304+2331delTCinsCT]; X…	XP_015834201.1:p.[His12759Tyr]; XP_015834190.1:p.[His12724Tyr]; XP_015834196.1:p.[His10290Tyr]; XP_015834189.1:p.[His12755Tyr]; XP_015834192.1:p.[His12759Tyr]; XP_015834195.1:p.[His11887Tyr]; XP_015834200.1:p.[His8949Tyr]; XP_015834191.1:p.[His12639Tyr]; XP_015834194.1:p.[His12759Tyr]; XP_015834199.1:p.[His8955Tyr]; XP_015834198.1:p.[His12759Tyr]	LOC660533	660533		660533 [Gene Symbol: LOC660533] [Locus Tag: TcasGA2_TC003987] [Chromosome: LG3] [Map Location: ] [Description: titin] [Gene Type: protein-coding]	TcasGA2_TC003987; LOC660533
392	NC_007418.3	29020060	SNV	A	G	Homozygous	29	29	100	1	14	19	0.42	38.9	33	33	8	15		1	1	no	G/G	No	1	107.18	XP_015834202.1:c.[36304+2245T>C]; XP_015834189.1:c.[38177T>C]; XP_015834199.1:c.[26777T>C]; XP_015834192.1:c.[38189T>C]; XP_015834201.1:c.[38189T>C]; XP_015834198.1:c.[38189T>C]; XP_015834197.1:c.[36304+2245T>C]; XP_015834194.1:c.[38189T>C]; XP_015834195.1:c.[35573T>C]; XP_015834200.1:c.[26759T>C]; XP_015834196.1:c.[30782T>C]; XP_015834190.1:c.[38084T>C]; XP_015834191.1:c.[37829T>C]	XP_015834189.1:p.[Ile12726Thr]; XP_015834199.1:p.[Ile8926Thr]; XP_015834192.1:p.[Ile12730Thr]; XP_015834201.1:p.[Ile12730Thr]; XP_015834198.1:p.[Ile12730Thr]; XP_015834194.1:p.[Ile12730Thr]; XP_015834195.1:p.[Ile11858Thr]; XP_015834200.1:p.[Ile8920Thr]; XP_015834196.1:p.[Ile10261Thr]; XP_015834190.1:p.[Ile12695Thr]; XP_015834191.1:p.[Ile12610Thr]	LOC660533	660533		660533 [Gene Symbol: LOC660533] [Locus Tag: TcasGA2_TC003987] [Chromosome: LG3] [Map Location: ] [Description: titin] [Gene Type: protein-coding]	TcasGA2_TC003987; LOC660533
393	NC_007418.3	29021848	SNV	A	G	Homozygous	21	21	100	1	15	10	0.4	38	25	25	12	17		1	1	no	G/G	No	1	83.1	XP_015834199.1:c.[24989T>C]; XP_015834194.1:c.[36401T>C]; XP_015834197.1:c.[36304+457T>C]; XP_015834195.1:c.[33785T>C]; XP_015834202.1:c.[36304+457T>C]; XP_015834201.1:c.[36401T>C]; XP_015834189.1:c.[36389T>C]; XP_015834192.1:c.[36401T>C]; XP_015834191.1:c.[36041T>C]; XP_015834190.1:c.[36296T>C]; XP_015834196.1:c.[28994T>C]; XP_015834200.1:c.[24971T>C]; XP_015834198.1:c.[36401T>C]	XP_015834199.1:p.[Leu8330Pro]; XP_015834194.1:p.[Leu12134Pro]; XP_015834195.1:p.[Leu11262Pro]; XP_015834201.1:p.[Leu12134Pro]; XP_015834189.1:p.[Leu12130Pro]; XP_015834192.1:p.[Leu12134Pro]; XP_015834191.1:p.[Leu12014Pro]; XP_015834190.1:p.[Leu12099Pro]; XP_015834196.1:p.[Leu9665Pro]; XP_015834200.1:p.[Leu8324Pro]; XP_015834198.1:p.[Leu12134Pro]	LOC660533	660533		660533 [Gene Symbol: LOC660533] [Locus Tag: TcasGA2_TC003987] [Chromosome: LG3] [Map Location: ] [Description: titin] [Gene Type: protein-coding]	TcasGA2_TC003987; LOC660533
394	NC_007418.3	29031006	SNV	A	T	Homozygous	20	20	100	1	10	13	0.43	38.5	23	23	15	15		1	1	no	T/T	No	1	81.7	XP_015834195.1:c.[26522T>A]; XP_015834200.1:c.[17708T>A]; XP_015834192.1:c.[29138T>A]; XP_015834191.1:c.[28778T>A]; XP_015834201.1:c.[29138T>A]; XP_015834202.1:c.[29138T>A]; XP_015834196.1:c.[25838-4239T>A]; XP_015834197.1:c.[29138T>A]; XP_015834198.1:c.[29138T>A]; XP_015834189.1:c.[29126T>A]; XP_015834199.1:c.[17726T>A]; XP_015834190.1:c.[29033T>A]; XP_015834194.1:c.[29138T>A]	XP_015834195.1:p.[Met8841Lys]; XP_015834200.1:p.[Met5903Lys]; XP_015834192.1:p.[Met9713Lys]; XP_015834191.1:p.[Met9593Lys]; XP_015834201.1:p.[Met9713Lys]; XP_015834202.1:p.[Met9713Lys]; XP_015834197.1:p.[Met9713Lys]; XP_015834198.1:p.[Met9713Lys]; XP_015834189.1:p.[Met9709Lys]; XP_015834199.1:p.[Met5909Lys]; XP_015834190.1:p.[Met9678Lys]; XP_015834194.1:p.[Met9713Lys]	LOC660533	660533		660533 [Gene Symbol: LOC660533] [Locus Tag: TcasGA2_TC003987] [Chromosome: LG3] [Map Location: ] [Description: titin] [Gene Type: protein-coding]	TcasGA2_TC003987; LOC660533
395	NC_007418.3	29033304	SNV	A	T	Homozygous	27	27	100	1	11	17	0.39	37.81	28	28	17	22		1	1	no	T/T	No	1	102.75	XP_015834192.1:c.[26840T>A]; XP_015834198.1:c.[26840T>A]; XP_015834202.1:c.[26840T>A]; XP_015834197.1:c.[26840T>A]; XP_015834190.1:c.[26735T>A]; XP_015834195.1:c.[24224T>A]; XP_015834194.1:c.[26840T>A]; XP_015834191.1:c.[26480T>A]; XP_015834201.1:c.[26840T>A]; XP_015834196.1:c.[25837+2436T>A]; XP_015834199.1:c.[15428T>A]; XP_015834200.1:c.[15410T>A]; XP_015834189.1:c.[26828T>A]	XP_015834192.1:p.[Ile8947Lys]; XP_015834198.1:p.[Ile8947Lys]; XP_015834202.1:p.[Ile8947Lys]; XP_015834197.1:p.[Ile8947Lys]; XP_015834190.1:p.[Ile8912Lys]; XP_015834195.1:p.[Ile8075Lys]; XP_015834194.1:p.[Ile8947Lys]; XP_015834191.1:p.[Ile8827Lys]; XP_015834201.1:p.[Ile8947Lys]; XP_015834199.1:p.[Ile5143Lys]; XP_015834200.1:p.[Ile5137Lys]; XP_015834189.1:p.[Ile8943Lys]	LOC660533	660533		660533 [Gene Symbol: LOC660533] [Locus Tag: TcasGA2_TC003987] [Chromosome: LG3] [Map Location: ] [Description: titin] [Gene Type: protein-coding]	TcasGA2_TC003987; LOC660533
396	NC_007418.3	29038043	SNV	C	T	Homozygous	22	22	100	1	8	18	0.31	37.09	26	26	12	15		1	1	no	T/T	No	1	87.71	XP_015834202.1:c.[25129G>A]; XP_015834189.1:c.[25117G>A]; XP_015834192.1:c.[25129G>A]; XP_015834190.1:c.[25024G>A]; XP_015834198.1:c.[25129G>A]; XP_015834191.1:c.[24769G>A]; XP_015834196.1:c.[25129G>A]; XP_015834199.1:c.[13717G>A]; XP_015834201.1:c.[25129G>A]; XP_015834195.1:c.[22513G>A]; XP_015834197.1:c.[25129G>A]; XP_015834200.1:c.[13699G>A]; XP_015834194.1:c.[25129G>A]	XP_015834202.1:p.[Val8377Ile]; XP_015834189.1:p.[Val8373Ile]; XP_015834192.1:p.[Val8377Ile]; XP_015834190.1:p.[Val8342Ile]; XP_015834198.1:p.[Val8377Ile]; XP_015834191.1:p.[Val8257Ile]; XP_015834196.1:p.[Val8377Ile]; XP_015834199.1:p.[Val4573Ile]; XP_015834201.1:p.[Val8377Ile]; XP_015834195.1:p.[Val7505Ile]; XP_015834197.1:p.[Val8377Ile]; XP_015834200.1:p.[Val4567Ile]; XP_015834194.1:p.[Val8377Il…	LOC660533	660533		660533 [Gene Symbol: LOC660533] [Locus Tag: TcasGA2_TC003987] [Chromosome: LG3] [Map Location: ] [Description: titin] [Gene Type: protein-coding]	TcasGA2_TC003987; LOC660533
397	NC_007418.3	29072371	SNV	A	T	Homozygous	24	24	100	1	16	9	0.36	37.67	25	25	14	17		1	1	no	T/T	No	1	93.73	XP_015834190.1:c.[4867T>A]; XP_015834197.1:c.[4867T>A]; XP_015834202.1:c.[4867T>A]; XP_015834195.1:c.[2251T>A]; XP_015834192.1:c.[4867T>A]; XP_015834191.1:c.[4867T>A]; XP_015834196.1:c.[4867T>A]; XP_015834189.1:c.[4855T>A]; XP_015834194.1:c.[4867T>A]; XP_015834201.1:c.[4867T>A]; XP_015834198.1:c.[4867T>A]	XP_015834190.1:p.[Cys1623Ser]; XP_015834197.1:p.[Cys1623Ser]; XP_015834202.1:p.[Cys1623Ser]; XP_015834195.1:p.[Cys751Ser]; XP_015834192.1:p.[Cys1623Ser]; XP_015834191.1:p.[Cys1623Ser]; XP_015834196.1:p.[Cys1623Ser]; XP_015834189.1:p.[Cys1619Ser]; XP_015834194.1:p.[Cys1623Ser]; XP_015834201.1:p.[Cys1623Ser]; XP_015834198.1:p.[Cys1623Ser]	LOC660533	660533		660533 [Gene Symbol: LOC660533] [Locus Tag: TcasGA2_TC003987] [Chromosome: LG3] [Map Location: ] [Description: titin] [Gene Type: protein-coding]	TcasGA2_TC003987; LOC660533
398	NC_007418.3	29126431	SNV	T	A	Heterozygous	15	21	71.43	1	3	13	0.19	38	16	22	6	9	0.31	0.61	0.81	no	A/T	No	1	30.71	XP_015834204.1:c.[2264T>A]; XP_008191495.1:c.[2204T>A]	XP_015834204.1:p.[Ile755Asn]; XP_008191495.1:p.[Ile735Asn]	LOC660101	660101		660101 [Gene Symbol: LOC660101] [Locus Tag: TcasGA2_TC002437] [Chromosome: LG3] [Map Location: ] [Description: titin homolog] [Gene Type: protein-coding]	TcasGA2_TC002437; LOC660101
399	NC_007418.3	29126917	SNV	T	C	Heterozygous	15	22	68.18	1	6	10	0.38	39.33	16	27	7	11	1.09	0.92	0.93	no	C/T	No	1	40.6	XP_015834204.1:c.[2750T>C]; XP_008191495.1:c.[2690T>C]	XP_015834204.1:p.[Leu917Ser]; XP_008191495.1:p.[Leu897Ser]	LOC660101	660101		660101 [Gene Symbol: LOC660101] [Locus Tag: TcasGA2_TC002437] [Chromosome: LG3] [Map Location: ] [Description: titin homolog] [Gene Type: protein-coding]	TcasGA2_TC002437; LOC660101
400	NC_007418.3	29127522	SNV	C	T	Heterozygous	10	23	43.48	1	2	8	0.2	34.4	10	24	5	7	-1.52	0.89	0.75	no	C/T	No	1	76.01	XP_008191495.1:c.[3295C>T]; XP_015834204.1:c.[3355C>T]	XP_008191495.1:p.[Pro1099Ser]; XP_015834204.1:p.[Pro1119Ser]	LOC660101	660101		660101 [Gene Symbol: LOC660101] [Locus Tag: TcasGA2_TC002437] [Chromosome: LG3] [Map Location: ] [Description: titin homolog] [Gene Type: protein-coding]	TcasGA2_TC002437; LOC660101
401	NC_007418.3	29333965	SNV	T	C	Heterozygous	6	20	30	1	0	6	0	39.17	6	20	5	5	0.7	0.82	1	no	C/T	No	1	34.7	XP_015834224.1:c.[5640+5105A>G]; XP_015834222.1:c.[5640+5105A>G]; XP_008191482.1:c.[3024+5105A>G]; XP_015834227.1:c.[3267+5105A>G]; XP_015834233.1:c.[544T>C]; XP_008191480.1:c.[3261+5105A>G]; XP_015834228.1:c.[3267+5105A>G]; XP_015834230.1:c.[3258+5105A>G]; XP_015834226.1:c.[5496+5105A>G]; XP_015834231.1:c.[3258+5105A>G]; XP_015834229.1:c.[3261+5105A>G]; XP_015834225.1:c.[5580+5105A>G]	XP_015834233.1:p.Ser182Pro	LOC659452, LOC107397695	659452 , 107397695		659452 [Gene Symbol: LOC659452] [Locus Tag: TcasGA2_TC003980] [Chromosome: LG3] [Map Location: ] [Description: FH1/FH2 domain-containing protein 3] [Gene Type: protein-coding] || 107397695 [Gene Symbol: LOC107397695] [Locus Tag: ] [Chromosome: LG3] [Map Location: ] [Description: uncharacterized LOC107397695] [Gene Type: protein-coding]	LOC659452; TcasGA2_TC003980 || LOC107397695
402	NC_007418.3	29531926	SNV	C	A	Heterozygous	6	20	30	1	3	3	0.5	40	6	24	3	3	-0.11	0.15	0.93	no	A/C	No	1	34.5	XP_015834188.1:c.1858G>T	XP_015834188.1:p.Val620Leu	LOC103312507	103312507		103312507 [Gene Symbol: LOC103312507] [Locus Tag: ] [Chromosome: LG3] [Map Location: ] [Description: protein piccolo-like] [Gene Type: protein-coding]	LOC103312507
403	NC_007418.3	29942396	SNV	T	G	Homozygous	21	21	100	1	14	14	0.5	36.86	28	28	11	16		1	1	no	G/G	No	1	80.09	XP_969398.1:c.718A>C	XP_969398.1:p.Ser240Arg	LOC657875	657875		657875 [Gene Symbol: LOC657875] [Locus Tag: TcasGA2_TC003965] [Chromosome: LG3] [Map Location: ] [Description: cyclic GMP-AMP synthase] [Gene Type: protein-coding]	TcasGA2_TC003965; LOC657875
404	NC_007418.3	30072080	SNV	G	A	Heterozygous	5	22	22.73	0.97	5	0	0	38.4	5	23	3	4	-0.31	0.25	0.38	no	A/G	No	1	15.49	XP_008190836.1:c.644C>T	XP_008190836.1:p.Ala215Val	LOC100141988	100141988		100141988 [Gene Symbol: LOC100141988] [Locus Tag: ] [Chromosome: LG3] [Map Location: ] [Description: zinc finger protein with KRAB and SCAN domains 1] [Gene Type: protein-coding]	scrt1; LOC100141988
405	NC_007418.3	30486768..30486769	MNV	GG	AC	Homozygous	24	24	100	1	10	18	0.36	37.98	28	28	15	15		1	1	no	AC/AC	No	1	200	XP_015834268.1:c.7607_7608delCCinsGT	XP_015834268.1:p.Thr2536Ser	LOC100141546	100141546		100141546 [Gene Symbol: LOC100141546] [Locus Tag: TcasGA2_TC002408] [Chromosome: LG3] [Map Location: ] [Description: protein-methionine sulfoxide oxidase Mical] [Gene Type: protein-coding]	LOC100141546; TcasGA2_TC002408
406	NC_007418.3	30633787	SNV	T	C	Heterozygous	23	30	76.67	0.99	9	15	0.38	39.3	24	31	10	12	1.23	0.99	0.98	no	C/T	No	1	18.43	XP_015834277.1:c.[577A>G]; XP_015834276.1:c.[577A>G]	XP_015834277.1:p.[Ile193Val]; XP_015834276.1:p.[Ile193Val]	LOC103313919	103313919		103313919 [Gene Symbol: LOC103313919] [Locus Tag: TcasGA2_TC032689] [Chromosome: LG3] [Map Location: ] [Description: E3 ubiquitin-protein ligase LRSAM1-like] [Gene Type: protein-coding]	TcasGA2_TC032689; LOC103313919
407	NC_007418.3	30634024	SNV	T	C	Heterozygous	15	24	62.5	1	3	12	0.2	38.53	15	24	8	7	0.86	0.65	0.99	no	C/T	No	1	60.48	XP_015834277.1:c.[340A>G]; XP_015834276.1:c.[340A>G]	XP_015834277.1:p.[Thr114Ala]; XP_015834276.1:p.[Thr114Ala]	LOC103313919	103313919		103313919 [Gene Symbol: LOC103313919] [Locus Tag: TcasGA2_TC032689] [Chromosome: LG3] [Map Location: ] [Description: E3 ubiquitin-protein ligase LRSAM1-like] [Gene Type: protein-coding]	TcasGA2_TC032689; LOC103313919
408	NC_007418.3	31255383	SNV	A	G	Homozygous	22	22	100	1	10	14	0.42	37.36	24	24	12	15		1	1	no	G/G	No	1	86.1	XP_968597.1:c.955A>G	XP_968597.1:p.Lys319Glu	LOC657015	657015		657015 [Gene Symbol: LOC657015] [Locus Tag: TcasGA2_TC004027] [Chromosome: LG3] [Map Location: ] [Description: carboxypeptidase A] [Gene Type: protein-coding]	LOC657015; TcasGA2_TC004027
409	NC_007419.2	298716	SNV	T	A	Heterozygous	6	20	30	1	4	3	0.43	38.83	7	21	4	5	0.37	0.83	0.9	no	A/T	No	1	33.34	XP_970176.1:c.224T>A	XP_970176.1:p.Leu75His	LOC658720	658720		658720 [Gene Symbol: LOC658720] [Locus Tag: TcasGA2_TC030691] [Chromosome: LG4] [Map Location: ] [Description: abnormal spindle-like microcephaly-associated protein homolog] [Gene Type: protein-coding]	LOC658720; TcasGA2_TC030691
410	NC_007419.2	869470	SNV	G	C	Homozygous	17	21	80.95	0.76	14	8	0.36	38.82	22	26	9	13	-0.27	0.94	0.99	no	C/G	No	1	6.22	XP_015834319.1:c.500C>G	XP_015834319.1:p.Thr167Ser	LOC662899	662899		662899 [Gene Symbol: LOC662899] [Locus Tag: TcasGA2_TC007689] [Chromosome: LG4] [Map Location: ] [Description: fatty acid synthase] [Gene Type: protein-coding]	TcasGA2_TC007689; LOC662899
411	NC_007419.2	869816	SNV	A	G	Homozygous	20	23	86.96	0.95	15	12	0.44	36.15	27	31	8	10		0.99	1	no	G/G	No	1	13.32	XP_015834319.1:c.154T>C	XP_015834319.1:p.Ser52Pro	LOC662899	662899		662899 [Gene Symbol: LOC662899] [Locus Tag: TcasGA2_TC007689] [Chromosome: LG4] [Map Location: ] [Description: fatty acid synthase] [Gene Type: protein-coding]	TcasGA2_TC007689; LOC662899
412	NC_007419.2	894632	SNV	A	G	Homozygous	21	21	100	1	8	16	0.33	36.9	24	24	11	12		1	1	no	G/G	No	1	83.1	XP_001813892.1:c.1421A>G	XP_001813892.1:p.Lys474Arg	LOC100141870	100141870		100141870 [Gene Symbol: LOC100141870] [Locus Tag: TcasGA2_TC007806] [Chromosome: LG4] [Map Location: ] [Description: location of vulva defective 1] [Gene Type: protein-coding]	TcasGA2_TC007806; LOC100141870
413	NC_007419.2	907666	SNV	G	T	Homozygous	22	22	100	1	5	21	0.19	36.86	26	26	14	14		1	1	no	T/T	No	1	87.71	XP_015834365.1:c.[3108+411G>T]; XP_008191674.1:c.[484C>A]; XP_008191675.1:c.[3087+411G>T]; XP_015834364.1:c.[3108+411G>T]	XP_008191674.1:p.Pro162Thr	LOC663146, LOC103312551	663146 , 103312551		663146 [Gene Symbol: LOC663146] [Locus Tag: TcasGA2_TC007807] [Chromosome: LG4] [Map Location: ] [Description: cilia- and flagella-associated protein 44] [Gene Type: protein-coding] || 103312551 [Gene Symbol: LOC103312551] [Locus Tag: TcasGA2_TC007686] [Chromosome: LG4] [Map Location: ] [Description: proteasome inhibitor PI31 subunit] [Gene Type: protein-coding]	LOC663146; TcasGA2_TC007807 || TcasGA2_TC007686; LOC103312551
414	NC_007419.2	1394432	SNV	G	A	Heterozygous	13	24	54.17	1	0	13	0	39.46	13	26	6	7	2.35	0.08	0.18	no	A/G	No	1	87.19	XP_966637.1:c.1081G>A	XP_966637.1:p.Val361Ile	LOC655049	655049		655049 [Gene Symbol: LOC655049] [Locus Tag: TcasGA2_TC007846] [Chromosome: LG4] [Map Location: ] [Description: rab proteins geranylgeranyltransferase component A 1] [Gene Type: protein-coding]	LOC655049; TcasGA2_TC007846
415	NC_007419.2	1593010	SNV	A	T	Heterozygous	9	21	42.86	1	2	7	0.22	39.78	9	21	3	4	2.81	0.1	0.44	no	A/T	No	1	69.02	XP_968050.1:c.[747-442A>T]; XP_008191777.1:c.[224T>A]	XP_008191777.1:p.Ile75Asn	LOC656424, LOC103312582	656424 , 103312582		656424 [Gene Symbol: LOC656424] [Locus Tag: TcasGA2_TC007854] [Chromosome: LG4] [Map Location: ] [Description: UDP-N-acetylglucosamine--dolichyl-phosphate N-acetylglucosaminephosphotransferase] [Gene Type: protein-coding] || 103312582 [Gene Symbol: LOC103312582] [Locus Tag: TcasGA2_TC007649] [Chromosome: LG4] [Map Location: ] [Description: beta-1,4-mannosyl-glycoprotein 4-beta-N-acetylglucosaminy…	LOC656424; TcasGA2_TC007854 || TcasGA2_TC007649; LOC103312582
416	NC_007419.2	1653656	SNV	C	T	Homozygous	25	25	100	1	14	13	0.48	38.76	27	27	13	16		1	1	no	T/T	No	1	96.74	XP_015834948.1:c.[355G>A]; XP_015834949.1:c.[355G>A]	XP_015834948.1:p.[Gly119Ser]; XP_015834949.1:p.[Gly119Ser]	LOC656845	656845		656845 [Gene Symbol: LOC656845] [Locus Tag: TcasGA2_TC007645] [Chromosome: LG4] [Map Location: ] [Description: nubbin] [Gene Type: protein-coding]	Nub; TcasGA2_TC007645; LOC656845
417	NC_007419.2	1758481	SNV	A	C	Heterozygous	10	22	45.45	1	8	2	0.2	37	10	22	4	7	1.32	0.29	0.4	no	A/C	No	1	79.73	XP_968671.1:c.1139A>C	XP_968671.1:p.Lys380Thr	LOC657098	657098		657098 [Gene Symbol: LOC657098] [Locus Tag: TcasGA2_TC007859] [Chromosome: LG4] [Map Location: ] [Description: ribonucleoside-diphosphate reductase large subunit] [Gene Type: protein-coding]	LOC657098; TcasGA2_TC007859
418	NC_007419.2	1847861	SNV	G	A	Homozygous	21	21	100	1	13	13	0.5	37.38	26	26	13	15		1	1	no	A/A	No	1	84.7	XP_008191785.1:c.[583G>A]; XP_015834666.1:c.[82-20503G>A]	XP_008191785.1:p.Gly195Ser	LOC107397771, LOC658116	107397771 , 658116		107397771 [Gene Symbol: LOC107397771] [Locus Tag: TcasGA2_TC007866] [Chromosome: LG4] [Map Location: ] [Description: uncharacterized LOC107397771] [Gene Type: protein-coding] || 658116 [Gene Symbol: LOC658116] [Locus Tag: TcasGA2_TC007865] [Chromosome: LG4] [Map Location: ] [Description: thioredoxin reductase 1, mitochondrial] [Gene Type: protein-coding]	TcasGA2_TC007866; LOC107397771 || TcasGA2_TC007865; LOC658116
419	NC_007419.2	1868389	SNV	G	T	Homozygous	20	20	100	1	13	13	0.5	36.35	26	26	13	15		1	1	no	T/T	No	1	81.7	XP_015834661.1:c.[1676-2453C>A]; XP_015834666.1:c.[107G>T]; XP_015834662.1:c.[1649-2453C>A]; XP_008191786.1:c.[1682-2453C>A]	XP_015834666.1:p.Cys36Phe	LOC107397771, LOC652934	107397771 , 652934		107397771 [Gene Symbol: LOC107397771] [Locus Tag: TcasGA2_TC007866] [Chromosome: LG4] [Map Location: ] [Description: uncharacterized LOC107397771] [Gene Type: protein-coding] || 652934 [Gene Symbol: LOC652934] [Locus Tag: TcasGA2_TC007637] [Chromosome: LG4] [Map Location: ] [Description: dachshund homolog 1] [Gene Type: protein-coding]	TcasGA2_TC007866; LOC107397771 || TcasGA2_TC007637; Dac; LOC652934
420	NC_007419.2	1994427	SNV	T	G	Homozygous	20	20	100	1	11	10	0.48	38.15	21	21	14	13		1	1	no	G/G	No	1	80.09	XP_008191746.2:c.669A>C	XP_008191746.2:p.Lys223Asn	LOC100142257	100142257		100142257 [Gene Symbol: LOC100142257] [Locus Tag: ] [Chromosome: LG4] [Map Location: ] [Description: UDP-glucuronosyltransferase 2B15-like] [Gene Type: protein-coding]	LOC100142257
421	NC_007419.2	2012618	SNV	A	T	Heterozygous	13	24	54.17	1	2	12	0.14	38.69	14	28	6	8	1.59	0.63	0.39	no	A/T	No	1	86.03	XP_970655.1:c.17T>A	XP_970655.1:p.Leu6His	LOC659237	659237		659237 [Gene Symbol: LOC659237] [Locus Tag: TcasGA2_TC007629] [Chromosome: LG4] [Map Location: ] [Description: peroxisomal membrane protein PEX16] [Gene Type: protein-coding]	TcasGA2_TC007629; LOC659237
422	NC_007419.2	2035093	SNV	G	T	Heterozygous	9	20	45	1	1	9	0.1	35.89	10	26	3	4	-0.8	0.3	0.78	no	G/T	No	1	68.38	XP_971019.1:c.3267G>T	XP_971019.1:p.Leu1089Phe	LOC659640	659640		659640 [Gene Symbol: LOC659640] [Locus Tag: TcasGA2_TC007876] [Chromosome: LG4] [Map Location: ] [Description: ectopic P granules protein 5 homolog] [Gene Type: protein-coding]	TcasGA2_TC007876; LOC659640
423	NC_007419.2	2040647	SNV	G	C	Homozygous	20	22	90.91	1	4	16	0.2	38.6	20	22	13	12		0.99	1	no	C/C	No	1	24.3	XP_971019.1:c.6380G>C	XP_971019.1:p.Ser2127Thr	LOC659640	659640		659640 [Gene Symbol: LOC659640] [Locus Tag: TcasGA2_TC007876] [Chromosome: LG4] [Map Location: ] [Description: ectopic P granules protein 5 homolog] [Gene Type: protein-coding]	TcasGA2_TC007876; LOC659640
424	NC_007419.2	2092836	SNV	A	G	Heterozygous	10	22	45.45	1	8	3	0.27	37.6	11	23	6	6	0.53	0.85	0.98	no	A/G	No	1	79.89	XP_971084.2:c.13048A>G	XP_971084.2:p.Asn4350Asp	LOC659713	659713		659713 [Gene Symbol: LOC659713] [Locus Tag: TcasGA2_TC007877] [Chromosome: LG4] [Map Location: ] [Description: cadherin-related tumor suppressor] [Gene Type: protein-coding]	LOC659713; TcasGA2_TC007877; FAT; ft
425	NC_007419.2	2092935	SNV	C	T	Heterozygous	6	22	27.27	1	1	6	0.14	39.5	7	23	4	3	0.7	0.87	0.99	no	C/T	No	1	27.89	XP_971084.2:c.13147C>T	XP_971084.2:p.Leu4383Phe	LOC659713	659713		659713 [Gene Symbol: LOC659713] [Locus Tag: TcasGA2_TC007877] [Chromosome: LG4] [Map Location: ] [Description: cadherin-related tumor suppressor] [Gene Type: protein-coding]	LOC659713; TcasGA2_TC007877; FAT; ft
426	NC_007419.2	2104659	SNV	A	G	Homozygous	20	20	100	1	12	14	0.46	37.8	26	26	12	14		1	1	no	G/G	No	1	80.1	XP_008191808.1:c.[910T>C]; XP_015835048.1:c.[385T>C]	XP_008191808.1:p.[Ser304Pro]; XP_015835048.1:p.[Ser129Pro]	LOC103312590	103312590		103312590 [Gene Symbol: LOC103312590] [Locus Tag: TcasGA2_TC007624] [Chromosome: LG4] [Map Location: ] [Description: leucine-rich repeat protein soc-2 homolog] [Gene Type: protein-coding]	TcasGA2_TC007624; LOC103312590
427	NC_007419.2	2281929..2281930	MNV	GT	AC	Heterozygous	16	30	53.33	1	9	9	0.5	37.65	18	33	10	14	1.57	0.94	0.98	no	complex	No	1	200	XP_015834320.1:c.3413_3414delACinsGT	XP_015834320.1:p.Asn1138Ser	LOC660708	660708		660708 [Gene Symbol: LOC660708] [Locus Tag: TcasGA2_TC007612] [Chromosome: LG4] [Map Location: ] [Description: uncharacterized LOC660708] [Gene Type: protein-coding]	TcasGA2_TC007612; LOC660708
428	NC_007419.2	2290112	SNV	A	G	Heterozygous	14	23	60.87	1	8	9	0.47	38.21	17	26	9	9	2.93	1	1	no	A/G	No	1	63.37	XP_015834320.1:c.1187T>C	XP_015834320.1:p.Val396Ala	LOC660708	660708		660708 [Gene Symbol: LOC660708] [Locus Tag: TcasGA2_TC007612] [Chromosome: LG4] [Map Location: ] [Description: uncharacterized LOC660708] [Gene Type: protein-coding]	TcasGA2_TC007612; LOC660708
429	NC_007419.2	2375809	SNV	A	G	Homozygous	25	25	100	1	18	13	0.42	35.92	31	31	14	16		1	1	no	G/G	No	1	95.14	XP_001812942.1:c.377A>G	XP_001812942.1:p.Glu126Gly	LOC100141771	100141771		100141771 [Gene Symbol: LOC100141771] [Locus Tag: TcasGA2_TC007896] [Chromosome: LG4] [Map Location: ] [Description: uncharacterized LOC100141771] [Gene Type: protein-coding]	TcasGA2_TC007896; LOC100141771
430	NC_007419.2	2754778	SNV	G	A	Heterozygous	5	22	22.73	0.97	2	3	0.4	38.8	5	24	3	3	1.76	0.08	0.97	no	A/G	No	1	15.41	XP_008191837.1:c.[1979C>T]; XP_973391.1:c.[1949C>T]	XP_008191837.1:p.[Thr660Ile]; XP_973391.1:p.[Thr650Ile]	LOC662184	662184		662184 [Gene Symbol: LOC662184] [Locus Tag: TcasGA2_TC007589] [Chromosome: LG4] [Map Location: ] [Description: kinesin B] [Gene Type: protein-coding]	LOC662184; kinesin-B; TcasGA2_TC007589
431	NC_007419.2	2852898	SNV	G	A	Heterozygous	14	21	66.67	1	9	7	0.44	36	16	25	6	9	-2.83	0.72	1	no	A/G	No	1	44.5	XP_974038.1:c.590C>T	XP_974038.1:p.Ser197Leu	LOC662870	662870		662870 [Gene Symbol: LOC662870] [Locus Tag: TcasGA2_TC007575] [Chromosome: LG4] [Map Location: ] [Description: mediator of RNA polymerase II transcription subunit 7] [Gene Type: protein-coding]	LOC662870; TcasGA2_TC007575
432	NC_007419.2	2852912	SNV	G	T	Heterozygous	14	22	63.64	1	9	7	0.44	38.29	16	26	6	9	0.61	0.64	1	no	G/T	No	1	54.03	XP_974038.1:c.576C>A	XP_974038.1:p.Asn192Lys	LOC662870	662870		662870 [Gene Symbol: LOC662870] [Locus Tag: TcasGA2_TC007575] [Chromosome: LG4] [Map Location: ] [Description: mediator of RNA polymerase II transcription subunit 7] [Gene Type: protein-coding]	LOC662870; TcasGA2_TC007575
433	NC_007419.2	3011470	SNV	C	G	Homozygous	20	20	100	1	12	11	0.48	39.05	23	23	12	12		1	1	no	G/G	No	1	80.09	XP_015834308.1:c.[2674G>C]; NP_001164308.1:c.[2674G>C]; XP_008191737.1:c.[2674G>C]; XP_008191735.1:c.[2674G>C]	XP_015834308.1:p.[Val892Leu]; NP_001164308.1:p.[Val892Leu]; XP_008191737.1:p.[Val892Leu]; XP_008191735.1:p.[Val892Leu]	pain	663508	painless	663508 [Gene Symbol: pain] [Locus Tag: TcasGA2_TC007561] [Chromosome: LG4] [Map Location: ] [Description: painless] [Gene Type: protein-coding]	GLEAN_07561; pain; TcasGA2_TC007561
434	NC_007419.2	3032474	SNV	C	T	Homozygous	22	22	100	1	16	7	0.3	38.77	23	23	12	17		1	1	no	T/T	No	1	87.71	XP_008191884.2:c.1244G>A	XP_008191884.2:p.Ser415Asn	LOC100142051	100142051		100142051 [Gene Symbol: LOC100142051] [Locus Tag: TcasGA2_TC007557] [Chromosome: LG4] [Map Location: ] [Description: uncharacterized LOC100142051] [Gene Type: protein-coding]	TcasGA2_TC007557; LOC100142051
435	NC_007419.2	3032717	SNV	G	C	Heterozygous	12	25	48	1	4	11	0.27	38.75	15	28	5	4	1.41	0.56	0.74	no	C/G	No	1	95.85	XP_008191884.2:c.1001C>G	XP_008191884.2:p.Ser334Cys	LOC100142051	100142051		100142051 [Gene Symbol: LOC100142051] [Locus Tag: TcasGA2_TC007557] [Chromosome: LG4] [Map Location: ] [Description: uncharacterized LOC100142051] [Gene Type: protein-coding]	TcasGA2_TC007557; LOC100142051
436	NC_007419.2	3118591	SNV	C	T	Heterozygous	36	50	72	1	20	21	0.49	38.75	41	59	23	25	0.77	0.87	1	no	C/T	No	1	53.27	XP_015834408.1:c.[255+28408C>T]; XP_008191906.2:c.[1579G>A]; XP_015834402.1:c.[1579G>A]; XP_015834403.1:c.[1231G>A]; XP_015834405.1:c.[1579G>A]; XP_015834404.1:c.[1018G>A]; XP_015834407.1:c.[603+28408C>T]; XP_008191893.1:c.[606+28408C>T]; XP_008191896.1:c.[525+28408C>T]; XP_015834401.1:c.[1579G>A]; XP_008191895.1:c.[273+28408C>T]; XP_015834409.1:c.[255+28408C>T]	XP_008191906.2:p.[Val527Ile]; XP_015834402.1:p.[Val527Ile]; XP_015834403.1:p.[Val411Ile]; XP_015834405.1:p.[Val527Ile]; XP_015834404.1:p.[Val340Ile]; XP_015834401.1:p.[Val527Ile]	LOC100141693, LOC100141568	100141693 , 100141568		100141693 [Gene Symbol: LOC100141693] [Locus Tag: TcasGA2_TC007950] [Chromosome: LG4] [Map Location: ] [Description: uncharacterized LOC100141693] [Gene Type: protein-coding] || 100141568 [Gene Symbol: LOC100141568] [Locus Tag: TcasGA2_TC007546] [Chromosome: LG4] [Map Location: ] [Description: retrovirus-related Pol polyprotein from transposon 17.6] [Gene Type: protein-coding]	LOC100141693; TcasGA2_TC007950 || TcasGA2_TC007546; LOC100141568
437	NC_007419.2	3220115	SNV	C	T	Heterozygous	6	21	28.57	1	5	3	0.38	36.67	8	23	5	4	0	0.34	0.96	no	C/T	No	1	30.61	XP_976472.1:c.128C>T	XP_976472.1:p.Ala43Val	LOC664065	664065		664065 [Gene Symbol: LOC664065] [Locus Tag: TcasGA2_TC007962] [Chromosome: LG4] [Map Location: ] [Description: uncharacterized LOC664065] [Gene Type: protein-coding]	LOC664065; TcasGA2_TC007962
438	NC_007419.2	3220122	SNV	T	G	Heterozygous	6	21	28.57	1	5	1	0.17	36.5	6	23	4	3	-1.4	0.24	0.7	no	G/T	No	1	31.23	XP_976472.1:c.135T>G	XP_976472.1:p.Phe45Leu	LOC664065	664065		664065 [Gene Symbol: LOC664065] [Locus Tag: TcasGA2_TC007962] [Chromosome: LG4] [Map Location: ] [Description: uncharacterized LOC664065] [Gene Type: protein-coding]	LOC664065; TcasGA2_TC007962
439	NC_007419.2	3220471	SNV	A	G	Homozygous	20	20	100	1	15	8	0.35	39.8	23	23	12	15		1	1	no	G/G	No	1	80.09	XP_976472.1:c.484A>G	XP_976472.1:p.Asn162Asp	LOC664065	664065		664065 [Gene Symbol: LOC664065] [Locus Tag: TcasGA2_TC007962] [Chromosome: LG4] [Map Location: ] [Description: uncharacterized LOC664065] [Gene Type: protein-coding]	LOC664065; TcasGA2_TC007962
440	NC_007419.2	3220482	SNV	G	C	Homozygous	20	20	100	1	15	8	0.35	39.2	23	23	12	15		1	1	no	C/C	No	1	80.11	XP_976472.1:c.495G>C	XP_976472.1:p.Glu165Asp	LOC664065	664065		664065 [Gene Symbol: LOC664065] [Locus Tag: TcasGA2_TC007962] [Chromosome: LG4] [Map Location: ] [Description: uncharacterized LOC664065] [Gene Type: protein-coding]	LOC664065; TcasGA2_TC007962
441	NC_007419.2	3220598	SNV	G	A	Heterozygous	17	22	77.27	0.98	8	9	0.47	38.12	17	23	9	8	-0.59	0.98	1	no	A/G	No	1	16.31	XP_976472.1:c.611G>A	XP_976472.1:p.Gly204Glu	LOC664065	664065		664065 [Gene Symbol: LOC664065] [Locus Tag: TcasGA2_TC007962] [Chromosome: LG4] [Map Location: ] [Description: uncharacterized LOC664065] [Gene Type: protein-coding]	LOC664065; TcasGA2_TC007962
442	NC_007419.2	3221037	SNV	C	A	Homozygous	22	22	100	1	12	15	0.44	38.95	27	27	12	15		1	1	no	A/A	No	1	87.7	XP_015835101.1:c.[281C>A]; XP_015835102.1:c.[281C>A]	XP_015835101.1:p.[Ala94Glu]; XP_015835102.1:p.[Ala94Glu]	LOC103312576	103312576		103312576 [Gene Symbol: LOC103312576] [Locus Tag: TcasGA2_TC030133] [Chromosome: LG4] [Map Location: ] [Description: uncharacterized LOC103312576] [Gene Type: protein-coding]	LOC103312576; TcGr36; TcGr34; TcasGA2_TC030133
443	NC_007419.2	3221090	SNV	A	C	Heterozygous	5	20	25	0.99	1	4	0.2	39.4	5	22	3	4	0.79	0.2	0.48	no	A/C	No	1	21.47	XP_015835102.1:c.[334A>C]; XP_015835101.1:c.[334A>C]	XP_015835102.1:p.[Lys112Gln]; XP_015835101.1:p.[Lys112Gln]	LOC103312576	103312576		103312576 [Gene Symbol: LOC103312576] [Locus Tag: TcasGA2_TC030133] [Chromosome: LG4] [Map Location: ] [Description: uncharacterized LOC103312576] [Gene Type: protein-coding]	LOC103312576; TcGr36; TcGr34; TcasGA2_TC030133
444	NC_007419.2	3247346	SNV	T	A	Heterozygous	12	28	42.86	1	4	8	0.33	35.5	12	30	5	6	-0.97	0.71	0.94	no	A/T	No	1	87.62	XP_008191923.1:c.1628T>A	XP_008191923.1:p.Phe543Tyr	LOC664109	664109		664109 [Gene Symbol: LOC664109] [Locus Tag: TcasGA2_TC007966] [Chromosome: LG4] [Map Location: ] [Description: arylsulfatase B] [Gene Type: protein-coding]	TcasGA2_TC007966; LOC664109
445	NC_007419.2	3292772..3292773	Deletion	CC	-	Homozygous	27	27	100	1	16	15	0.48	36.22	31	31	19	22		1	1	no	-/-	No	1	200	XP_008191926.1:c.30_31delCC	XP_008191926.1:p.Leu13fs	LOC664156	664156		664156 [Gene Symbol: LOC664156] [Locus Tag: TcasGA2_TC007970] [Chromosome: LG4] [Map Location: ] [Description: protein angel] [Gene Type: protein-coding]	TcasGA2_TC007970; LOC664156
446	NC_007419.2	3314469	SNV	A	C	Heterozygous	15	20	75	0.98	7	10	0.41	37.53	17	22	10	9	0.61	0.93	1	no	A/C	No	1	17.18	XP_975322.1:c.[383-422A>C]; XP_015834458.1:c.[909A>C]	XP_015834458.1:p.Glu303Asp	LOC664217, LOC103312569	664217 , 103312569		664217 [Gene Symbol: LOC664217] [Locus Tag: TcasGA2_TC007974] [Chromosome: LG4] [Map Location: ] [Description: syntaxin-5] [Gene Type: protein-coding] || 103312569 [Gene Symbol: LOC103312569] [Locus Tag: ] [Chromosome: LG4] [Map Location: ] [Description: uncharacterized LOC103312569] [Gene Type: protein-coding]	LOC664217; TcasGA2_TC007974 || LOC103312569
447	NC_007419.2	3314698	SNV	A	G	Heterozygous	9	21	42.86	1	4	8	0.33	39.89	12	30	8	8	1.42	0.57	0.94	no	A/G	No	1	70.02	XP_975322.1:c.[383-193A>G]; XP_015834458.1:c.[1138A>G]	XP_015834458.1:p.Lys380Glu	LOC664217, LOC103312569	664217 , 103312569		664217 [Gene Symbol: LOC664217] [Locus Tag: TcasGA2_TC007974] [Chromosome: LG4] [Map Location: ] [Description: syntaxin-5] [Gene Type: protein-coding] || 103312569 [Gene Symbol: LOC103312569] [Locus Tag: ] [Chromosome: LG4] [Map Location: ] [Description: uncharacterized LOC103312569] [Gene Type: protein-coding]	LOC664217; TcasGA2_TC007974 || LOC103312569
448	NC_007419.2	3410096	SNV	G	C	Heterozygous	6	20	30	1	1	5	0.17	39	6	21	2	2	0.99	0.08	0.4	no	C/G	No	1	33.32	XP_015834562.1:c.[1688C>G]; XP_015834561.1:c.[1772C>G]; XP_015834560.1:c.[1817C>G]; XP_008191932.1:c.[1817C>G]	XP_015834562.1:p.[Thr563Ser]; XP_015834561.1:p.[Thr591Ser]; XP_015834560.1:p.[Thr606Ser]; XP_008191932.1:p.[Thr606Ser]	LOC664270	664270		664270 [Gene Symbol: LOC664270] [Locus Tag: TcasGA2_TC007523] [Chromosome: LG4] [Map Location: ] [Description: WD repeat-containing protein 19] [Gene Type: protein-coding]	TcasGA2_TC007523; LOC664270
449	NC_007419.2	3413453	SNV	G	A	Homozygous	24	24	100	1	6	18	0.25	37.38	24	24	13	14		1	1	no	A/A	No	1	93.72	XP_975378.1:c.394G>A	XP_975378.1:p.Val132Ile	LOC664277	664277		664277 [Gene Symbol: LOC664277] [Locus Tag: TcasGA2_TC007981] [Chromosome: LG4] [Map Location: ] [Description: lipase 3] [Gene Type: protein-coding]	LOC664277; TcasGA2_TC007981
450	NC_007419.2	3427575	SNV	A	G	Homozygous	22	22	100	1	6	16	0.27	39.05	22	22	9	15		1	1	no	G/G	No	1	86.11	XP_975398.2:c.[3313T>C]; XP_008191939.1:c.[3007T>C]; XP_015834558.1:c.[3154T>C]; XP_008191938.1:c.[3250T>C]; XP_008191937.1:c.[3313T>C]; XP_015834559.1:c.[3313T>C]	XP_975398.2:p.[Ser1105Pro]; XP_008191939.1:p.[Ser1003Pro]; XP_015834558.1:p.[Ser1052Pro]; XP_008191938.1:p.[Ser1084Pro]; XP_008191937.1:p.[Ser1105Pro]; XP_015834559.1:p.[Ser1105Pro]	LOC664298	664298		664298 [Gene Symbol: LOC664298] [Locus Tag: TcasGA2_TC007519] [Chromosome: LG4] [Map Location: ] [Description: AT-rich interactive domain-containing protein 2] [Gene Type: protein-coding]	LOC664298; TcasGA2_TC007519
451	NC_007419.2	3449763	SNV	G	A	Heterozygous	5	21	23.81	0.98	0	5	0	38	5	21	1	2	0.08	0.12	0.33	no	A/G	No	1	18.13	XP_015834565.1:c.6337C>T	XP_015834565.1:p.Arg2113*	LOC664324	664324		664324 [Gene Symbol: LOC664324] [Locus Tag: TcasGA2_TC007516] [Chromosome: LG4] [Map Location: ] [Description: dynein heavy chain 1, axonemal] [Gene Type: protein-coding]	TcasGA2_TC007516; LOC664324
452	NC_007419.2	3536198	SNV	C	G	Heterozygous	6	24	25	0.99	6	3	0.33	36.5	9	29	6	3	-0.07	0.66	0.56	no	C/G	No	1	22.28	XP_008192005.1:c.343C>G	XP_008192005.1:p.Arg115Gly	LOC103312647	103312647		103312647 [Gene Symbol: LOC103312647] [Locus Tag: TcasGA2_TC007990] [Chromosome: LG4] [Map Location: ] [Description: hypothetical protein] [Gene Type: protein-coding]	LOC103312647; TcasGA2_TC007990
453	NC_007419.2	3536217	SNV	A	G	Homozygous	23	23	100	1	9	18	0.33	38.22	27	27	14	12		1	1	no	G/G	No	1	89.12	XP_008192005.1:c.362A>G	XP_008192005.1:p.Gln121Arg	LOC103312647	103312647		103312647 [Gene Symbol: LOC103312647] [Locus Tag: TcasGA2_TC007990] [Chromosome: LG4] [Map Location: ] [Description: hypothetical protein] [Gene Type: protein-coding]	LOC103312647; TcasGA2_TC007990
454	NC_007419.2	3536234	SNV	G	A	Heterozygous	5	23	21.74	0.95	4	3	0.43	37.4	7	28	5	2	-0.56	0.83	0.48	no	A/G	No	1	12.8	XP_008192005.1:c.379G>A	XP_008192005.1:p.Val127Ile	LOC103312647	103312647		103312647 [Gene Symbol: LOC103312647] [Locus Tag: TcasGA2_TC007990] [Chromosome: LG4] [Map Location: ] [Description: hypothetical protein] [Gene Type: protein-coding]	LOC103312647; TcasGA2_TC007990
455	NC_007419.2	3555468	SNV	T	A	Heterozygous	16	22	72.73	1	13	3	0.19	38.06	16	24	10	11	-0.77	0.63	0.61	no	A/T	No	1	27.94	XP_001810985.1:c.1523A>T	XP_001810985.1:p.His508Leu	LOC655519	655519		655519 [Gene Symbol: LOC655519] [Locus Tag: ] [Chromosome: LG4] [Map Location: ] [Description: 4-coumarate--CoA ligase 1-like] [Gene Type: protein-coding]	LOC655519
456	NC_007419.2	3555471	SNV	C	A	Heterozygous	15	21	71.43	1	12	3	0.2	36.27	15	23	10	10	-2.14	0.63	0.63	no	A/C	No	1	31.43	XP_001810985.1:c.1520G>T	XP_001810985.1:p.Arg507Ile	LOC655519	655519		655519 [Gene Symbol: LOC655519] [Locus Tag: ] [Chromosome: LG4] [Map Location: ] [Description: 4-coumarate--CoA ligase 1-like] [Gene Type: protein-coding]	LOC655519
457	NC_007419.2	3642151	SNV	G	A	Heterozygous	8	27	29.63	1	6	3	0.33	36.88	9	32	4	6	0.48	0.76	0.81	no	A/G	No	1	39.67	XP_015834995.1:c.107C>T	XP_015834995.1:p.Pro36Leu	LOC655597	655597		655597 [Gene Symbol: LOC655597] [Locus Tag: TcasGA2_TC007505] [Chromosome: LG4] [Map Location: ] [Description: gamma-sarcoglycan] [Gene Type: protein-coding]	LOC655597; TcasGA2_TC007505
458	NC_007419.2	3671546	SNV	C	G	Heterozygous	6	20	30	1	3	4	0.43	37.67	7	24	5	6	1.4	0.61	0.95	no	C/G	No	1	33.38	XP_015835073.1:c.[1364C>G]; XP_008192015.2:c.[989C>G]; XP_967505.2:c.[1355C>G]; XP_015835074.1:c.[1346C>G]	XP_015835073.1:p.[Thr455Ser]; XP_008192015.2:p.[Thr330Ser]; XP_967505.2:p.[Thr452Ser]; XP_015835074.1:p.[Thr449Ser]	LOC655850	655850		655850 [Gene Symbol: LOC655850] [Locus Tag: TcasGA2_TC007996] [Chromosome: LG4] [Map Location: ] [Description: otopetrin-2] [Gene Type: protein-coding]	TcasGA2_TC007996; LOC655850
459	NC_007419.2	3694471	SNV	A	T	Heterozygous	5	21	23.81	0.98	0	5	0	33.6	5	24	3	3	-2.56	0.31	0.68	no	A/T	No	1	18.03	XP_015835094.1:c.[974A>T]; XP_967818.2:c.[986A>T]	XP_015835094.1:p.[Glu325Val]; XP_967818.2:p.[Glu329Val]	LOC656180	656180		656180 [Gene Symbol: LOC656180] [Locus Tag: TcasGA2_TC007998] [Chromosome: LG4] [Map Location: ] [Description: otopetrin-1] [Gene Type: protein-coding]	TcasGA2_TC007998; LOC656180
460	NC_007419.2	3707791	SNV	A	T	Homozygous	25	25	100	1	7	18	0.28	37.76	25	25	13	15		1	1	no	T/T	No	1	96.74	XP_015834670.1:c.[130T>A]; XP_968051.2:c.[130T>A]	XP_015834670.1:p.[Ser44Thr]; XP_968051.2:p.[Ser44Thr]	LOC656425	656425		656425 [Gene Symbol: LOC656425] [Locus Tag: TcasGA2_TC007499] [Chromosome: LG4] [Map Location: ] [Description: uncharacterized LOC656425] [Gene Type: protein-coding]	LOC656425; TcasGA2_TC007499
461	NC_007419.2	3712828..3712829	MNV	CT	AA	Heterozygous	13	20	65	1	4	9	0.31	38.04	13	20	6	7		0.96	0.89	no	complex	No	1	200	XP_015834668.1:c.[1383_1384delCTinsAA]; XP_015834669.1:c.[843_844delCTinsAA]	XP_015834668.1:p.[Asn461_Ser462delinsLysThr]; XP_015834669.1:p.[Asn281_Ser282delinsLysThr]	LOC100141608	100141608		100141608 [Gene Symbol: LOC100141608] [Locus Tag: TcasGA2_TC008000] [Chromosome: LG4] [Map Location: ] [Description: acyl-CoA synthetase family member 4] [Gene Type: protein-coding]	LOC100141608; TcasGA2_TC008000
462	NC_007419.2	3764388	SNV	A	G	Heterozygous	6	20	30	1	3	3	0.5	40.67	6	20	2	5	2.14	0.32	1	no	A/G	No	1	34.53	XP_001811750.1:c.508A>G	XP_001811750.1:p.Arg170Gly	LOC100141895	100141895		100141895 [Gene Symbol: LOC100141895] [Locus Tag: TcasGA2_TC008002] [Chromosome: LG4] [Map Location: ] [Description: exonuclease 3'-5' domain-containing protein 1] [Gene Type: protein-coding]	TcasGA2_TC008002; LOC100141895
463	NC_007419.2	3782201	SNV	A	G	Heterozygous	8	27	29.63	1	5	3	0.38	37.62	8	27	3	6	1.25	0.3	0.69	no	A/G	No	1	40.57	XP_976245.1:c.322A>G	XP_976245.1:p.Thr108Ala	LOC657405	657405		657405 [Gene Symbol: LOC657405] [Locus Tag: TcasGA2_TC008005] [Chromosome: LG4] [Map Location: ] [Description: cuticle protein 16.5, isoform A] [Gene Type: protein-coding]	TcasGA2_TC008005; LOC657405
464	NC_007419.2	3782277	SNV	C	A	Homozygous	25	25	100	1	8	17	0.32	36.12	25	25	12	19		1	1	no	A/A	No	1	96.74	XP_976245.1:c.398C>A	XP_976245.1:p.Pro133Gln	LOC657405	657405		657405 [Gene Symbol: LOC657405] [Locus Tag: TcasGA2_TC008005] [Chromosome: LG4] [Map Location: ] [Description: cuticle protein 16.5, isoform A] [Gene Type: protein-coding]	TcasGA2_TC008005; LOC657405
465	NC_007419.2	4011962	SNV	A	G	Homozygous	23	23	100	1	12	14	0.46	36.83	26	26	15	14		1	1	no	G/G	No	1	89.12	XP_008192048.1:c.2161A>G	XP_008192048.1:p.Ile721Val	LOC659578	659578		659578 [Gene Symbol: LOC659578] [Locus Tag: TcasGA2_TC008022] [Chromosome: LG4] [Map Location: ] [Description: transmembrane protein 131] [Gene Type: protein-coding]	TcasGA2_TC008022; LOC659578
466	NC_007419.2	4065692	SNV	C	T	Homozygous	24	24	100	1	20	5	0.2	37.04	25	25	12	16		1	1	no	T/T	No	1	93.73	XP_008192378.1:c.962C>T	XP_008192378.1:p.Ser321Phe	LOC103312731	103312731		103312731 [Gene Symbol: LOC103312731] [Locus Tag: TcasGA2_TC032800] [Chromosome: LG4] [Map Location: ] [Description: uncharacterized LOC103312731] [Gene Type: protein-coding]	LOC103312731; TcasGA2_TC032800
467	NC_007419.2	4065730	SNV	G	A	Homozygous	20	20	100	1	14	9	0.39	36	23	23	14	12		1	1	no	A/A	No	1	81.69	XP_008192378.1:c.1000G>A	XP_008192378.1:p.Ala334Thr	LOC103312731	103312731		103312731 [Gene Symbol: LOC103312731] [Locus Tag: TcasGA2_TC032800] [Chromosome: LG4] [Map Location: ] [Description: uncharacterized LOC103312731] [Gene Type: protein-coding]	LOC103312731; TcasGA2_TC032800
468	NC_007419.2	4105233	SNV	G	T	Heterozygous	5	21	23.81	0.97	0	5	0	41	5	21	1	1	1.86	0.6	0.81	no	G/T	No	1	14.64	XP_008192059.2:c.[805G>T]; XP_015835093.1:c.[805G>T]	XP_008192059.2:p.[Asp269Tyr]; XP_015835093.1:p.[Asp269Tyr]	LOC660654	660654		660654 [Gene Symbol: LOC660654] [Locus Tag: TcasGA2_TC008032] [Chromosome: LG4] [Map Location: ] [Description: coiled-coil domain-containing protein 170] [Gene Type: protein-coding]	TcasGA2_TC008032; LOC660654
469	NC_007419.2	4105245	SNV	G	C	Homozygous	21	21	100	1	2	19	0.1	39.9	21	21	5	6		1	1	no	C/C	No	1	83.12	XP_008192059.2:c.[817G>C]; XP_015835093.1:c.[817G>C]	XP_008192059.2:p.[Val273Leu]; XP_015835093.1:p.[Val273Leu]	LOC660654	660654		660654 [Gene Symbol: LOC660654] [Locus Tag: TcasGA2_TC008032] [Chromosome: LG4] [Map Location: ] [Description: coiled-coil domain-containing protein 170] [Gene Type: protein-coding]	TcasGA2_TC008032; LOC660654
470	NC_007419.2	4131263	SNV	G	A	Heterozygous	5	21	23.81	0.99	3	4	0.43	36	7	23	3	4	-2.15	0.06	0.28	no	A/G	No	1	18.27	XP_008192063.2:c.625C>T	XP_008192063.2:p.Arg209Cys	LOC100142303	100142303		100142303 [Gene Symbol: LOC100142303] [Locus Tag: TcasGA2_TC007464] [Chromosome: LG4] [Map Location: ] [Description: uncharacterized LOC100142303] [Gene Type: protein-coding]	TcasGA2_TC007464; LOC100142303
471	NC_007419.2	4137901	SNV	C	G	Homozygous	26	26	100	1	9	19	0.32	38.73	28	28	15	18		1	1	no	G/G	No	1	98.15	XP_008192060.1:c.517C>G	XP_008192060.1:p.Pro173Ala	LOC660927	660927		660927 [Gene Symbol: LOC660927] [Locus Tag: TcasGA2_TC008035] [Chromosome: LG4] [Map Location: ] [Description: multidrug resistance-associated protein 7] [Gene Type: protein-coding]	LOC660927; TcasGA2_TC008035
472	NC_007419.2	4264846	SNV	T	A	Homozygous	20	20	100	1	14	6	0.3	39.35	20	20	13	16		1	1	no	A/A	No	1	81.69	XP_008192072.1:c.[1001A>T]; XP_008192073.1:c.[953A>T]	XP_008192072.1:p.[Tyr334Phe]; XP_008192073.1:p.[Tyr318Phe]	LOC103312659	103312659		103312659 [Gene Symbol: LOC103312659] [Locus Tag: TcasGA2_TC007456] [Chromosome: LG4] [Map Location: ] [Description: zinc finger protein 112] [Gene Type: protein-coding]	LOC103312659; TcasGA2_TC007456
473	NC_007419.2	4265269	SNV	C	T	Heterozygous	9	21	42.86	1	3	8	0.27	38.44	11	24	5	6	0.21	0.09	0.74	no	C/T	No	1	68.88	XP_008192072.1:c.[578G>A]; XP_008192073.1:c.[530G>A]	XP_008192072.1:p.[Arg193Lys]; XP_008192073.1:p.[Arg177Lys]	LOC103312659	103312659		103312659 [Gene Symbol: LOC103312659] [Locus Tag: TcasGA2_TC007456] [Chromosome: LG4] [Map Location: ] [Description: zinc finger protein 112] [Gene Type: protein-coding]	LOC103312659; TcasGA2_TC007456
474	NC_007419.2	4265282	SNV	T	C	Heterozygous	14	23	60.87	1	10	5	0.33	37.5	15	27	8	10	-0.66	0.34	0.7	no	C/T	No	1	63.35	XP_008192072.1:c.[565A>G]; XP_008192073.1:c.[517A>G]	XP_008192072.1:p.[Lys189Glu]; XP_008192073.1:p.[Lys173Glu]	LOC103312659	103312659		103312659 [Gene Symbol: LOC103312659] [Locus Tag: TcasGA2_TC007456] [Chromosome: LG4] [Map Location: ] [Description: zinc finger protein 112] [Gene Type: protein-coding]	LOC103312659; TcasGA2_TC007456
475	NC_007419.2	4270196	SNV	T	G	Homozygous	25	25	100	1	17	13	0.43	36.92	30	30	15	20		1	1	no	G/G	No	1	95.14	XP_972622.1:c.[118T>G]; XP_008192070.1:c.[118T>G]	XP_972622.1:p.[Ser40Ala]; XP_008192070.1:p.[Ser40Ala]	LOC661368	661368		661368 [Gene Symbol: LOC661368] [Locus Tag: TcasGA2_TC008045] [Chromosome: LG4] [Map Location: ] [Description: coronin-7] [Gene Type: protein-coding]	LOC661368; TcasGA2_TC008045
476	NC_007419.2	4347953..4347954	MNV	TT	CC	Homozygous	28	28	100	1	19	13	0.41	35.79	32	32	14	17		1	1	no	CC/CC	No	1	200	XP_001814289.1:c.[1730_1731delTTinsCC]; XP_015834883.1:c.[1661_1662delTTinsCC]	XP_001814289.1:p.[Ile577Thr]; XP_015834883.1:p.[Ile554Thr]	LOC100142575	100142575		100142575 [Gene Symbol: LOC100142575] [Locus Tag: TcasGA2_TC008051] [Chromosome: LG4] [Map Location: ] [Description: uncharacterized LOC100142575] [Gene Type: protein-coding]	LOC100142575; TcasGA2_TC008051
477	NC_007419.2	4409170	SNV	G	A	Heterozygous	10	24	41.67	1	8	4	0.33	38.4	12	30	8	9	0.97	0.92	1	no	A/G	No	1	73.42	XP_008192382.1:c.1135G>A	XP_008192382.1:p.Val379Met	LOC662185	662185		662185 [Gene Symbol: LOC662185] [Locus Tag: TcasGA2_TC032806] [Chromosome: LG4] [Map Location: ] [Description: TWiK family of potassium channels protein 9] [Gene Type: protein-coding]	LOC662185; TcasGA2_TC032806
478	NC_007419.2	4679274	SNV	T	A	Homozygous	22	22	100	1	5	20	0.2	38.73	25	25	8	10		1	1	no	A/A	No	1	87.71	XP_008192115.1:c.[1210A>T]; XP_008192117.1:c.[1132A>T]; XP_008192116.1:c.[1204A>T]; XP_008192113.1:c.[1210A>T]	XP_008192115.1:p.[Thr404Ser]; XP_008192117.1:p.[Thr378Ser]; XP_008192116.1:p.[Thr402Ser]; XP_008192113.1:p.[Thr404Ser]	LOC663093	663093		663093 [Gene Symbol: LOC663093] [Locus Tag: TcasGA2_TC007427] [Chromosome: LG4] [Map Location: ] [Description: mucin-5AC] [Gene Type: protein-coding]	TcasGA2_TC007427; LOC663093
479	NC_007419.2	4751131..4751132	MNV	AA	GG	Heterozygous	15	21	71.43	1	8	7	0.47	39.53	15	21	8	13		0.88	1	no	complex	No	1	200	XP_974350.1:c.1720_1721delTTinsCC	XP_974350.1:p.Leu574Pro	LOC663199	663199		663199 [Gene Symbol: LOC663199] [Locus Tag: TcasGA2_TC007421] [Chromosome: LG4] [Map Location: ] [Description: RNA-binding protein 28] [Gene Type: protein-coding]	LOC663199; TcasGA2_TC007421
480	NC_007419.2	4751131..4751133	MNV	AAG	GGA	Heterozygous	6	21	28.57	1	2	4	0.33	38.44	6	21	4	6		0.65	0.91	no	complex	No	1	200	XP_974350.1:c.1719_1721delCTTinsTCC	XP_974350.1:p.Leu574Pro	LOC663199	663199		663199 [Gene Symbol: LOC663199] [Locus Tag: TcasGA2_TC007421] [Chromosome: LG4] [Map Location: ] [Description: RNA-binding protein 28] [Gene Type: protein-coding]	LOC663199; TcasGA2_TC007421
481	NC_007419.2	4975744	SNV	G	A	Heterozygous	8	22	36.36	1	1	8	0.11	40.62	9	25	3	6	2.49	0.03	0.81	no	A/G	No	1	53.51	XP_974764.1:c.1090G>A	XP_974764.1:p.Asp364Asn	LOC663633	663633		663633 [Gene Symbol: LOC663633] [Locus Tag: TcasGA2_TC008092] [Chromosome: LG4] [Map Location: ] [Description: zinc finger protein OZF] [Gene Type: protein-coding]	LOC663633; TcasGA2_TC008092
482	NC_007419.2	4995423	Deletion	A	-	Heterozygous	9	20	45	1	3	7	0.3	38.11	10	21	7	9	-1.6	0.45	1	no	-/A	Yes	3	70.82	XP_008192137.1:c.569delA	XP_008192137.1:p.Met191fs	LOC103312668	103312668		103312668 [Gene Symbol: LOC103312668] [Locus Tag: TcasGA2_TC008097] [Chromosome: LG4] [Map Location: ] [Description: hypothetical protein] [Gene Type: protein-coding]	LOC103312668; TcasGA2_TC008097
483	NC_007419.2	4995437	SNV	G	C	Homozygous	20	20	100	1	6	15	0.29	38.7	21	21	12	16		1	1	no	C/C	No	1	80.12	XP_008192137.1:c.583G>C	XP_008192137.1:p.Glu195Gln	LOC103312668	103312668		103312668 [Gene Symbol: LOC103312668] [Locus Tag: TcasGA2_TC008097] [Chromosome: LG4] [Map Location: ] [Description: hypothetical protein] [Gene Type: protein-coding]	LOC103312668; TcasGA2_TC008097
484	NC_007419.2	5023166	SNV	G	A	Heterozygous	6	20	30	1	5	1	0.17	38.17	6	24	4	6	-0.25	0.64	0.54	no	A/G	No	1	33.67	XP_015834326.1:c.305G>A	XP_015834326.1:p.Gly102Glu	LOC663765, LOC663775	663765 , 663775		663765 [Gene Symbol: LOC663765] [Locus Tag: TcasGA2_TC007403] [Chromosome: LG4] [Map Location: ] [Description: probable glutamine-dependent NAD(+) synthetase] [Gene Type: protein-coding] || 663775 [Gene Symbol: LOC663775] [Locus Tag: TcasGA2_TC008100] [Chromosome: LG4] [Map Location: ] [Description: uncharacterized LOC663775] [Gene Type: protein-coding]	TcasGA2_TC007403; LOC663765 || LOC663775; TcasGA2_TC008100
485	NC_007419.2	5052172	SNV	A	T	Homozygous	18	20	90	0.99	12	13	0.48	37.5	25	27	9	10		0.98	1	no	T/T	No	1	19.5	XP_015834463.1:c.6829A>T	XP_015834463.1:p.Met2277Leu	LOC663896	663896		663896 [Gene Symbol: LOC663896] [Locus Tag: TcasGA2_TC008109] [Chromosome: LG4] [Map Location: ] [Description: cytoplasmic dynein 2 heavy chain 1] [Gene Type: protein-coding]	TcasGA2_TC008109; LOC663896
486	NC_007419.2	5052197	SNV	A	G	Homozygous	22	23	95.65	1	14	16	0.47	37.86	30	31	12	12		1	1	no	G/G	No	1	61.55	XP_015834463.1:c.6854A>G	XP_015834463.1:p.Asn2285Ser	LOC663896	663896		663896 [Gene Symbol: LOC663896] [Locus Tag: TcasGA2_TC008109] [Chromosome: LG4] [Map Location: ] [Description: cytoplasmic dynein 2 heavy chain 1] [Gene Type: protein-coding]	TcasGA2_TC008109; LOC663896
487	NC_007419.2	5058231	SNV	C	G	Heterozygous	10	20	50	1	7	3	0.3	37	10	20	4	6	-1.29	0.87	1	no	C/G	No	1	81.39	XP_015834463.1:c.11733C>G	XP_015834463.1:p.Asp3911Glu	LOC663896	663896		663896 [Gene Symbol: LOC663896] [Locus Tag: TcasGA2_TC008109] [Chromosome: LG4] [Map Location: ] [Description: cytoplasmic dynein 2 heavy chain 1] [Gene Type: protein-coding]	TcasGA2_TC008109; LOC663896
488	NC_007419.2	5069288	SNV	G	A	Homozygous	22	22	100	1	6	17	0.26	38.55	23	23	12	16		1	1	no	A/A	No	1	87.71	XP_001815774.1:c.109G>A	XP_001815774.1:p.Val37Ile	LOC100141744	100141744		100141744 [Gene Symbol: LOC100141744] [Locus Tag: TcasGA2_TC008111] [Chromosome: LG4] [Map Location: ] [Description: gem-associated protein 5] [Gene Type: protein-coding]	LOC100141744; TcasGA2_TC008111
489	NC_007419.2	5513244	SNV	T	C	Heterozygous	5	22	22.73	0.98	4	2	0.33	37.4	6	24	5	5	-0.16	0.6	0.67	no	C/T	No	1	16.46	XP_015834900.1:c.[1429A>G]; XP_975373.2:c.[1825A>G]	XP_015834900.1:p.[Thr477Ala]; XP_975373.2:p.[Thr609Ala]	LOC664271	664271		664271 [Gene Symbol: LOC664271] [Locus Tag: TcasGA2_TC007370] [Chromosome: LG4] [Map Location: ] [Description: insulin-like receptor] [Gene Type: protein-coding]	TcasGA2_TC007370; LOC664271; ilr2
490	NC_007419.2	5513270	SNV	T	C	Heterozygous	5	20	25	0.99	1	4	0.2	39.8	5	22	4	4	1.44	0.77	0.78	no	C/T	No	1	21.96	XP_015834900.1:c.[1403A>G]; XP_975373.2:c.[1799A>G]	XP_015834900.1:p.[Lys468Arg]; XP_975373.2:p.[Lys600Arg]	LOC664271	664271		664271 [Gene Symbol: LOC664271] [Locus Tag: TcasGA2_TC007370] [Chromosome: LG4] [Map Location: ] [Description: insulin-like receptor] [Gene Type: protein-coding]	TcasGA2_TC007370; LOC664271; ilr2
491	NC_007419.2	5514510	SNV	A	T	Heterozygous	9	31	29.03	1	9	1	0.1	34.89	10	33	5	7	-1.89	0.56	0.4	no	A/T	No	1	41.14	XP_015834900.1:c.[211T>A]; XP_975373.2:c.[607T>A]	XP_015834900.1:p.[Ser71Thr]; XP_975373.2:p.[Ser203Thr]	LOC664271	664271		664271 [Gene Symbol: LOC664271] [Locus Tag: TcasGA2_TC007370] [Chromosome: LG4] [Map Location: ] [Description: insulin-like receptor] [Gene Type: protein-coding]	TcasGA2_TC007370; LOC664271; ilr2
492	NC_007419.2	5514521	SNV	T	C	Heterozygous	6	29	20.69	0.9	6	1	0.14	38.67	7	30	4	5	0.24	0.53	0.64	no	C/T	No	1	10.1	XP_975373.2:c.[596A>G]; XP_015834900.1:c.[200A>G]	XP_975373.2:p.[Lys199Arg]; XP_015834900.1:p.[Lys67Arg]	LOC664271	664271		664271 [Gene Symbol: LOC664271] [Locus Tag: TcasGA2_TC007370] [Chromosome: LG4] [Map Location: ] [Description: insulin-like receptor] [Gene Type: protein-coding]	TcasGA2_TC007370; LOC664271; ilr2
493	NC_007419.2	5547836	SNV	T	C	Heterozygous	8	26	30.77	1	3	6	0.33	38.5	9	30	5	8	2.03	0.54	0.72	no	C/T	No	1	43.5	XP_975382.1:c.263A>G	XP_975382.1:p.Asp88Gly	LOC664282	664282		664282 [Gene Symbol: LOC664282] [Locus Tag: TcasGA2_TC007369] [Chromosome: LG4] [Map Location: ] [Description: D-beta-hydroxybutyrate dehydrogenase, mitochondrial] [Gene Type: protein-coding]	LOC664282; TcasGA2_TC007369
494	NC_007419.2	5775738	SNV	A	C	Heterozygous	15	25	60	1	0	15	0	38.33	15	27	5	7	0.55	0.64	0.37	no	A/C	No	1	66.93	XP_008192213.1:c.[1162T>G]; XP_008192215.1:c.[820T>G]; XP_008192217.1:c.[673T>G]; XP_008192214.1:c.[1093T>G]	XP_008192213.1:p.[Ser388Ala]; XP_008192215.1:p.[Ser274Ala]; XP_008192217.1:p.[Ser225Ala]; XP_008192214.1:p.[Ser365Ala]	LOC103312685	103312685		103312685 [Gene Symbol: LOC103312685] [Locus Tag: TcasGA2_TC007354] [Chromosome: LG4] [Map Location: ] [Description: titin homolog] [Gene Type: protein-coding]	TcasGA2_TC007354; LOC103312685
495	NC_007419.2	5803369..5803371	Deletion	TTA	-	Heterozygous	9	21	42.86	1	3	7	0.3	37	10	24	6	7	-0.34	0.93	0.83	no	complex	No	1	200	XP_975464.2:c.2049_2051delTAA	XP_975464.2:p.Asn684del	LOC664362	664362		664362 [Gene Symbol: LOC664362] [Locus Tag: TcasGA2_TC007351] [Chromosome: LG4] [Map Location: ] [Description: spondin-1] [Gene Type: protein-coding]	LOC664362; TcasGA2_TC007351
496	NC_007419.2	6162582	SNV	A	G	Heterozygous	7	23	30.43	1	7	0	0	37.71	7	23	2	5	0.33	0.16	0.67	no	A/G	No	1	38.84	XP_008192256.1:c.538A>G	XP_008192256.1:p.Ile180Val	LOC103312696	103312696		103312696 [Gene Symbol: LOC103312696] [Locus Tag: TcasGA2_TC008181] [Chromosome: LG4] [Map Location: ] [Description: hypothetical protein] [Gene Type: protein-coding]	TcasGA2_TC008181; LOC103312696
497	NC_007419.2	6162586	SNV	T	C	Heterozygous	14	21	66.67	1	9	5	0.36	36.71	14	21	9	12	0.41	0.79	0.87	no	C/T	No	1	43.42	XP_008192256.1:c.542T>C	XP_008192256.1:p.Val181Ala	LOC103312696	103312696		103312696 [Gene Symbol: LOC103312696] [Locus Tag: TcasGA2_TC008181] [Chromosome: LG4] [Map Location: ] [Description: hypothetical protein] [Gene Type: protein-coding]	TcasGA2_TC008181; LOC103312696
498	NC_007419.2	6226886	SNV	T	G	Heterozygous	5	20	25	0.99	0	5	0	38.2	5	26	1	2	-1.83	0.15	0.38	no	G/T	No	1	21.3	XP_015834502.1:c.[295-19062T>G]; XP_008192263.1:c.[295-19062T>G]; XP_015834498.1:c.[295-19062T>G]; XP_015834511.1:c.[1187A>C]; XP_015834503.1:c.[295-19062T>G]; XP_015834499.1:c.[295-19062T>G]; XP_015834501.1:c.[295-19062T>G]; XP_015834500.1:c.[295-19062T>G]	XP_015834511.1:p.Lys396Thr	LOC664485, LOC107397748	664485 , 107397748		664485 [Gene Symbol: LOC664485] [Locus Tag: TcasGA2_TC008184] [Chromosome: LG4] [Map Location: ] [Description: uncharacterized protein CG43867] [Gene Type: protein-coding] || 107397748 [Gene Symbol: LOC107397748] [Locus Tag: ] [Chromosome: LG4] [Map Location: ] [Description: probable cytochrome P450 6a20] [Gene Type: protein-coding]	TcasGA2_TC008184; LOC664485 || LOC107397748
499	NC_007419.2	6287483	SNV	G	T	Homozygous	20	20	100	1	13	9	0.41	38.15	22	22	12	17		1	1	no	T/T	No	1	81.7	XP_015834332.1:c.1000C>A	XP_015834332.1:p.His334Asn	LOC103312745	103312745		103312745 [Gene Symbol: LOC103312745] [Locus Tag: TcasGA2_TC007307] [Chromosome: LG4] [Map Location: ] [Description: titin] [Gene Type: protein-coding]	LOC103312745; TcasGA2_TC007307
500	NC_007419.2	6310221	SNV	G	T	Heterozygous	13	21	61.9	1	3	11	0.21	38.08	14	23	8	9	0.94	0.89	0.99	no	G/T	No	1	56.81	XP_008192273.1:c.[949C>A]; XP_008192274.1:c.[949C>A]; XP_008192276.1:c.[901C>A]; XP_008192277.1:c.[727C>A]; XP_008192272.1:c.[949C>A]	XP_008192273.1:p.[Leu317Ile]; XP_008192274.1:p.[Leu317Ile]; XP_008192276.1:p.[Leu301Ile]; XP_008192277.1:p.[Leu243Ile]; XP_008192272.1:p.[Leu317Ile]	LOC664496	664496		664496 [Gene Symbol: LOC664496] [Locus Tag: TcasGA2_TC007305] [Chromosome: LG4] [Map Location: ] [Description: anoctamin-1] [Gene Type: protein-coding]	TcasGA2_TC007305; LOC664496
501	NC_007419.2	6322252	SNV	T	C	Heterozygous	5	22	22.73	0.98	3	4	0.43	37.8	7	24	3	3	-0.39	0.5	0.88	no	C/T	No	1	16.47	XP_015834685.1:c.91A>G	XP_015834685.1:p.Lys31Glu	LOC664500	664500		664500 [Gene Symbol: LOC664500] [Locus Tag: TcasGA2_TC007303] [Chromosome: LG4] [Map Location: ] [Description: uridine diphosphate glucose pyrophosphatase] [Gene Type: protein-coding]	LOC664500; TcasGA2_TC007303
502	NC_007419.2	6349177	SNV	T	G	Heterozygous	15	28	53.57	1	11	6	0.35	38.6	17	30	9	9	-0.18	0.81	1	no	G/T	No	1	97.03	XP_008192282.1:c.538T>G	XP_008192282.1:p.Ser180Ala	LOC664506	664506		664506 [Gene Symbol: LOC664506] [Locus Tag: TcasGA2_TC008189] [Chromosome: LG4] [Map Location: ] [Description: DNA-directed RNA polymerase III subunit RPC3] [Gene Type: protein-coding]	TcasGA2_TC008189; LOC664506
503	NC_007419.2	6436116	SNV	T	C	Homozygous	21	23	91.3	1	11	14	0.44	37.1	25	27	15	14		1	1	no	C/C	No	1	32.87	XP_008192291.1:c.2834A>G	XP_008192291.1:p.Asn945Ser	LOC103312701	103312701		103312701 [Gene Symbol: LOC103312701] [Locus Tag: TcasGA2_TC007293] [Chromosome: LG4] [Map Location: ] [Description: uncharacterized LOC103312701] [Gene Type: protein-coding]	TcasGA2_TC007293; LOC103312701
504	NC_007419.2	6633760..6633761	MNV	CA	GT	Heterozygous	7	23	30.43	1	4	4	0.5	36.64	8	24	4	7		0.86	0.92	no	complex	No	1	200	XP_015834333.1:c.2709_2710delTGinsAC	XP_015834333.1:p.Gly904Arg	LOC100141964	100141964		100141964 [Gene Symbol: LOC100141964] [Locus Tag: TcasGA2_TC007273] [Chromosome: LG4] [Map Location: LG4|LG4] [Description: elastin] [Gene Type: protein-coding]	LOC100141964; TcasGA2_TC007273
505	NC_007419.2	6633823	SNV	C	T	Heterozygous	10	24	41.67	1	6	5	0.45	38.1	11	25	5	8	-0.03	0.2	0.6	no	C/T	No	1	73.26	XP_015834333.1:c.2647G>A	XP_015834333.1:p.Gly883Arg	LOC100141964	100141964		100141964 [Gene Symbol: LOC100141964] [Locus Tag: TcasGA2_TC007273] [Chromosome: LG4] [Map Location: LG4|LG4] [Description: elastin] [Gene Type: protein-coding]	LOC100141964; TcasGA2_TC007273
506	NC_007419.2	6660458	SNV	C	T	Homozygous	21	21	100	1	15	12	0.44	39.67	27	27	12	13		1	1	no	T/T	No	1	84.7	XP_015834808.1:c.398G>A	XP_015834808.1:p.Ser133Asn	LOC107397801	107397801		107397801 [Gene Symbol: LOC107397801] [Locus Tag: TcasGA2_TC030426] [Chromosome: LG4] [Map Location: ] [Description: uncharacterized LOC107397801] [Gene Type: protein-coding]	LOC107397801; TcasGA2_TC030426; Or313
507	NC_007419.2	6713700	SNV	G	A	Heterozygous	14	20	70	1	12	4	0.25	35.79	16	22	6	7	-1.32	0.62	0.89	no	A/G	No	1	34.55	XP_001816522.1:c.703G>A	XP_001816522.1:p.Gly235Ser	LOC100142439	100142439		100142439 [Gene Symbol: LOC100142439] [Locus Tag: TcasGA2_TC008208] [Chromosome: LG4] [Map Location: ] [Description: elastin] [Gene Type: protein-coding]	LOC100142439; TcasGA2_TC008208
508	NC_007419.2	6737517	SNV	T	A	Heterozygous	5	20	25	0.99	2	3	0.4	39	5	20	4	5	1	0.93	1	no	A/T	No	1	20.66	XP_008192323.1:c.1284A>T	XP_008192323.1:p.Glu428Asp	LOC100142501	100142501		100142501 [Gene Symbol: LOC100142501] [Locus Tag: TcasGA2_TC032845] [Chromosome: LG4] [Map Location: ] [Description: UDP-glucuronosyltransferase 2C1] [Gene Type: protein-coding]	TcasGA2_TC032845; LOC100142501
509	NC_007419.2	6754282	SNV	T	G	Homozygous	20	20	100	1	13	10	0.43	37.7	23	23	14	20		1	1	no	G/G	No	1	80.09	XP_001816525.1:c.[549A>C]; XP_015834996.1:c.[549A>C]; XP_008192327.1:c.[549A>C]; XP_008192326.1:c.[549A>C]; XP_015834997.1:c.[549A>C]	XP_001816525.1:p.[Gln183His]; XP_015834996.1:p.[Gln183His]; XP_008192327.1:p.[Gln183His]; XP_008192326.1:p.[Gln183His]; XP_015834997.1:p.[Gln183His]	LOC100141541	100141541		100141541 [Gene Symbol: LOC100141541] [Locus Tag: TcasGA2_TC007258] [Chromosome: LG4] [Map Location: ] [Description: pupal cuticle protein 36] [Gene Type: protein-coding]	TcasGA2_TC007258; LOC100141541
510	NC_007419.2	6912741	SNV	T	C	Heterozygous	7	20	35	1	0	7	0	40.14	7	20	2	4	2.42	0.03	0.2	no	C/T	No	1	47.46	XP_008192352.1:c.[274A>G]; XP_008192349.1:c.[274A>G]; XP_975643.1:c.[274A>G]; XP_008192347.1:c.[274A>G]; XP_008192354.1:c.[274A>G]; XP_008192351.1:c.[274A>G]; XP_008192350.1:c.[274A>G]; XP_008192353.1:c.[274A>G]	XP_008192352.1:p.[Ile92Val]; XP_008192349.1:p.[Ile92Val]; XP_975643.1:p.[Ile92Val]; XP_008192347.1:p.[Ile92Val]; XP_008192354.1:p.[Ile92Val]; XP_008192351.1:p.[Ile92Val]; XP_008192350.1:p.[Ile92Val]; XP_008192353.1:p.[Ile92Val]	LOC664554	664554		664554 [Gene Symbol: LOC664554] [Locus Tag: TcasGA2_TC007250] [Chromosome: LG4] [Map Location: ] [Description: interference hedgehog] [Gene Type: protein-coding]	TcasGA2_TC007250; LOC664554
511	NC_007419.2	6941571	SNV	A	C	Homozygous	18	22	81.82	0.64	9	10	0.47	38.22	19	23	7	10		0.73	0.98	no	C/T	No	1	4.39	XP_008192355.1:c.[2580T>G]; XP_975645.2:c.[2562T>G]	XP_008192355.1:p.[His860Gln]; XP_975645.2:p.[His854Gln]	LOC664556	664556		664556 [Gene Symbol: LOC664556] [Locus Tag: TcasGA2_TC007248] [Chromosome: LG4] [Map Location: ] [Description: nuclear factor related to kappa-B-binding protein] [Gene Type: protein-coding]	TcasGA2_TC007248; LOC664556
512	NC_007419.2	6946357	SNV	C	T	Heterozygous	11	26	42.31	1	11	1	0.08	39.27	12	27	6	8	0.16	0.04	0.03	no	C/T	No	1	80.37	XP_008192357.1:c.[1237G>A]; XP_008192356.1:c.[1261G>A]	XP_008192357.1:p.[Val413Ile]; XP_008192356.1:p.[Val421Ile]	LOC664559	664559		664559 [Gene Symbol: LOC664559] [Locus Tag: TcasGA2_TC007247] [Chromosome: LG4] [Map Location: ] [Description: croquemort] [Gene Type: protein-coding]	TcasGA2_TC007247; LOC664559; crq
513	NC_007419.2	7091697^7091698	Insertion	-	A	Heterozygous	7	23	30.43	1	7	2	0.22	36	9	26	4	6	0.23	0.67	0.8	no	-/A	No	1	38.48	XP_008192500.1:c.[176_177insA]; XP_008192501.1:c.[176_177insA]	XP_008192500.1:p.[Ile60fs]; XP_008192501.1:p.[Ile60fs]	LOC655677	655677		655677 [Gene Symbol: LOC655677] [Locus Tag: TcasGA2_TC008234] [Chromosome: LG4] [Map Location: ] [Description: spidroin-1] [Gene Type: protein-coding]	LOC655677; TcasGA2_TC008234
514	NC_007419.2	7091698^7091699	Insertion	-	CT	Heterozygous	8	24	33.33	1	7	3	0.3	37.62	10	27	5	9	1.9	0.76	0.93	no	complex	No	1	200	XP_008192501.1:c.[177_178insCT]; XP_008192500.1:c.[177_178insCT]	XP_008192501.1:p.[Ile60fs]; XP_008192500.1:p.[Ile60fs]	LOC655677	655677		655677 [Gene Symbol: LOC655677] [Locus Tag: TcasGA2_TC008234] [Chromosome: LG4] [Map Location: ] [Description: spidroin-1] [Gene Type: protein-coding]	LOC655677; TcasGA2_TC008234
515	NC_007419.2	7091701	SNV	C	G	Heterozygous	9	24	37.5	0.65	4	6	0.4	37.22	10	27	5	7	0.26	0.64	0.73	no	G/T	No	1	4.51	XP_008192501.1:c.[180C>G]; XP_008192500.1:c.[180C>G]	XP_008192501.1:p.[Ile60Met]; XP_008192500.1:p.[Ile60Met]	LOC655677	655677		655677 [Gene Symbol: LOC655677] [Locus Tag: TcasGA2_TC008234] [Chromosome: LG4] [Map Location: ] [Description: spidroin-1] [Gene Type: protein-coding]	LOC655677; TcasGA2_TC008234
516	NC_007419.2	7092570	SNV	G	A	Heterozygous	9	20	45	1	7	3	0.3	39	10	23	5	8	1.14	0.73	0.96	no	A/G	No	1	71.7	XP_008192500.1:c.[1049G>A]; XP_008192501.1:c.[1049G>A]	XP_008192500.1:p.[Gly350Glu]; XP_008192501.1:p.[Gly350Glu]	LOC655677	655677		655677 [Gene Symbol: LOC655677] [Locus Tag: TcasGA2_TC008234] [Chromosome: LG4] [Map Location: ] [Description: spidroin-1] [Gene Type: protein-coding]	LOC655677; TcasGA2_TC008234
517	NC_007419.2	7093097	SNV	T	A	Heterozygous	7	21	33.33	1	4	5	0.44	36.43	9	28	5	5	-1.49	0.37	0.97	no	A/T	No	1	43.34	XP_008192501.1:c.[1576T>A]; XP_008192500.1:c.[1576T>A]	XP_008192501.1:p.[Leu526Ile]; XP_008192500.1:p.[Leu526Ile]	LOC655677	655677		655677 [Gene Symbol: LOC655677] [Locus Tag: TcasGA2_TC008234] [Chromosome: LG4] [Map Location: ] [Description: spidroin-1] [Gene Type: protein-coding]	LOC655677; TcasGA2_TC008234
518	NC_007419.2	7142527	SNV	T	C	Homozygous	25	25	100	1	3	23	0.12	35.52	26	26	11	16		1	1	no	C/C	No	1	95.16	XP_015834336.1:c.131T>C	XP_015834336.1:p.Leu44Pro	LOC107397718	107397718		107397718 [Gene Symbol: LOC107397718] [Locus Tag: ] [Chromosome: LG4] [Map Location: ] [Description: fibrous sheath CABYR-binding protein-like] [Gene Type: protein-coding]	LOC107397718
519	NC_007419.2	7171062	SNV	G	A	Heterozygous	10	20	50	1	4	6	0.4	36.8	10	21	5	5	-0.79	0.49	0.99	no	A/G	No	1	81.98	XP_015834640.1:c.[4682C>T]; XP_015834639.1:c.[4682C>T]; XP_015834641.1:c.[4679C>T]; XP_015834644.1:c.[4574C>T]; XP_015834638.1:c.[4682C>T]; XP_015834642.1:c.[4682C>T]; XP_015834646.1:c.[3086C>T]; XP_015834647.1:c.[2618C>T]; XP_015834643.1:c.[4682C>T]; XP_015834645.1:c.[3857C>T]	XP_015834640.1:p.[Thr1561Ile]; XP_015834639.1:p.[Thr1561Ile]; XP_015834641.1:p.[Thr1560Ile]; XP_015834644.1:p.[Thr1525Ile]; XP_015834638.1:p.[Thr1561Ile]; XP_015834642.1:p.[Thr1561Ile]; XP_015834646.1:p.[Thr1029Ile]; XP_015834647.1:p.[Thr873Ile]; XP_015834643.1:p.[Thr1561Ile]; XP_015834645.1:p.[Thr1286Ile]	LOC656932	656932		656932 [Gene Symbol: LOC656932] [Locus Tag: TcasGA2_TC007231] [Chromosome: LG4] [Map Location: ] [Description: mucin-2] [Gene Type: protein-coding]	TcasGA2_TC007231; LOC656932
520	NC_007419.2	7172143	SNV	C	T	Heterozygous	13	20	65	1	7	11	0.39	37.46	18	25	7	6	-0.83	0.55	0.96	no	C/T	No	1	47.41	XP_015834639.1:c.[3952G>A]; XP_015834644.1:c.[3952G>A]; XP_015834638.1:c.[3952G>A]; XP_015834642.1:c.[3952G>A]; XP_015834643.1:c.[3952G>A]; XP_015834647.1:c.[2380-843G>A]; XP_015834645.1:c.[3618+334G>A]; XP_015834641.1:c.[3949G>A]; XP_015834646.1:c.[2848-843G>A]; XP_015834640.1:c.[3952G>A]	XP_015834639.1:p.[Gly1318Ser]; XP_015834644.1:p.[Gly1318Ser]; XP_015834638.1:p.[Gly1318Ser]; XP_015834642.1:p.[Gly1318Ser]; XP_015834643.1:p.[Gly1318Ser]; XP_015834641.1:p.[Gly1317Ser]; XP_015834640.1:p.[Gly1318Ser]	LOC656932	656932		656932 [Gene Symbol: LOC656932] [Locus Tag: TcasGA2_TC007231] [Chromosome: LG4] [Map Location: ] [Description: mucin-2] [Gene Type: protein-coding]	TcasGA2_TC007231; LOC656932
521	NC_007419.2	7172178	SNV	G	A	Heterozygous	6	21	28.57	1	3	6	0.33	34.83	9	26	3	2	-2.41	0.02	0.98	no	A/G	No	1	30.92	XP_015834642.1:c.[3917C>T]; XP_015834638.1:c.[3917C>T]; XP_015834647.1:c.[2380-878C>T]; XP_015834645.1:c.[3618+299C>T]; XP_015834640.1:c.[3917C>T]; XP_015834641.1:c.[3914C>T]; XP_015834639.1:c.[3917C>T]; XP_015834646.1:c.[2848-878C>T]; XP_015834643.1:c.[3917C>T]; XP_015834644.1:c.[3917C>T]	XP_015834642.1:p.[Pro1306Leu]; XP_015834638.1:p.[Pro1306Leu]; XP_015834640.1:p.[Pro1306Leu]; XP_015834641.1:p.[Pro1305Leu]; XP_015834639.1:p.[Pro1306Leu]; XP_015834643.1:p.[Pro1306Leu]; XP_015834644.1:p.[Pro1306Leu]	LOC656932	656932		656932 [Gene Symbol: LOC656932] [Locus Tag: TcasGA2_TC007231] [Chromosome: LG4] [Map Location: ] [Description: mucin-2] [Gene Type: protein-coding]	TcasGA2_TC007231; LOC656932
522	NC_007419.2	7172649	SNV	G	A	Heterozygous	10	23	43.48	1	10	0	0	38.3	10	23	6	8	1.12	0.32	0.36	no	A/G	No	1	76.17	XP_015834643.1:c.[3446C>T]; XP_015834647.1:c.[2380-1349C>T]; XP_015834642.1:c.[3446C>T]; XP_015834640.1:c.[3446C>T]; XP_015834646.1:c.[2847+599C>T]; XP_015834639.1:c.[3446C>T]; XP_015834644.1:c.[3446C>T]; XP_015834641.1:c.[3443C>T]; XP_015834645.1:c.[3446C>T]; XP_015834638.1:c.[3446C>T]	XP_015834643.1:p.[Pro1149Leu]; XP_015834642.1:p.[Pro1149Leu]; XP_015834640.1:p.[Pro1149Leu]; XP_015834639.1:p.[Pro1149Leu]; XP_015834644.1:p.[Pro1149Leu]; XP_015834641.1:p.[Pro1148Leu]; XP_015834645.1:p.[Pro1149Leu]; XP_015834638.1:p.[Pro1149Leu]	LOC656932	656932		656932 [Gene Symbol: LOC656932] [Locus Tag: TcasGA2_TC007231] [Chromosome: LG4] [Map Location: ] [Description: mucin-2] [Gene Type: protein-coding]	TcasGA2_TC007231; LOC656932
523	NC_007419.2	7251650	SNV	T	G	Heterozygous	13	27	48.15	1	11	3	0.21	37	14	28	7	8	-0.51	0.82	1	no	G/T	No	1	93.91	XP_008192538.1:c.[1768A>C]; XP_015835078.1:c.[1768A>C]; XP_015835077.1:c.[1768A>C]; XP_015835076.1:c.[1768A>C]	XP_008192538.1:p.[Asn590His]; XP_015835078.1:p.[Asn590His]; XP_015835077.1:p.[Asn590His]; XP_015835076.1:p.[Asn590His]	LOC658035	658035		658035 [Gene Symbol: LOC658035] [Locus Tag: TcasGA2_TC007226] [Chromosome: LG4] [Map Location: ] [Description: peroxidasin-like protein] [Gene Type: protein-coding]	TcasGA2_TC007226; LOC658035
524	NC_007419.2	7538131	SNV	C	T	Heterozygous	7	29	24.14	0.99	6	3	0.33	34	9	35	5	5	-2.93	0.16	0.9	no	C/T	No	1	21.26	XP_008192549.1:c.469G>A	XP_008192549.1:p.Ala157Thr	Grd, LOC103312802	659976 , 103312802	GABA-gated ion channel	659976 [Gene Symbol: Grd] [Locus Tag: TcasGA2_TC008266] [Chromosome: LG4] [Map Location: ] [Description: GABA-gated ion channel] [Gene Type: protein-coding] || 103312802 [Gene Symbol: LOC103312802] [Locus Tag: TcasGA2_TC007207] [Chromosome: LG4] [Map Location: ] [Description: serine/arginine repetitive matrix protein 4] [Gene Type: protein-coding]	TcasGA2_TC008266; Grd || LOC103312802; TcasGA2_TC007207
525	NC_007419.2	7538133	SNV	G	A	Heterozygous	8	33	24.24	0.99	7	3	0.3	35.88	10	39	5	5	-1.55	0.52	0.72	no	A/G	No	1	22.95	XP_008192549.1:c.467C>T	XP_008192549.1:p.Ala156Val	Grd, LOC103312802	659976 , 103312802	GABA-gated ion channel	659976 [Gene Symbol: Grd] [Locus Tag: TcasGA2_TC008266] [Chromosome: LG4] [Map Location: ] [Description: GABA-gated ion channel] [Gene Type: protein-coding] || 103312802 [Gene Symbol: LOC103312802] [Locus Tag: TcasGA2_TC007207] [Chromosome: LG4] [Map Location: ] [Description: serine/arginine repetitive matrix protein 4] [Gene Type: protein-coding]	TcasGA2_TC008266; Grd || LOC103312802; TcasGA2_TC007207
526	NC_007419.2	7538280	SNV	C	T	Homozygous	19	21	90.48	0.99	6	13	0.32	35.68	19	21	9	9		0.91	1	no	T/T	No	1	21.61	XP_008192549.1:c.320G>A	XP_008192549.1:p.Arg107Gln	Grd, LOC103312802	659976 , 103312802	GABA-gated ion channel	659976 [Gene Symbol: Grd] [Locus Tag: TcasGA2_TC008266] [Chromosome: LG4] [Map Location: ] [Description: GABA-gated ion channel] [Gene Type: protein-coding] || 103312802 [Gene Symbol: LOC103312802] [Locus Tag: TcasGA2_TC007207] [Chromosome: LG4] [Map Location: ] [Description: serine/arginine repetitive matrix protein 4] [Gene Type: protein-coding]	TcasGA2_TC008266; Grd || LOC103312802; TcasGA2_TC007207
527	NC_007419.2	7630317	SNV	A	T	Homozygous	22	22	100	1	16	9	0.36	38.86	25	25	10	16		1	1	no	T/T	No	1	87.71	XP_008192565.1:c.474A>T	XP_008192565.1:p.Leu158Phe	LOC660709	660709		660709 [Gene Symbol: LOC660709] [Locus Tag: TcasGA2_TC008271] [Chromosome: LG4] [Map Location: ] [Description: 39S ribosomal protein L28, mitochondrial] [Gene Type: protein-coding]	LOC660709; TcasGA2_TC008271
528	NC_007419.2	7630725	SNV	A	G	Homozygous	28	28	100	1	11	18	0.38	39.46	29	29	18	17		1	1	no	G/G	No	1	104.17	XP_008192565.1:c.775A>G	XP_008192565.1:p.Ser259Gly	LOC660709	660709		660709 [Gene Symbol: LOC660709] [Locus Tag: TcasGA2_TC008271] [Chromosome: LG4] [Map Location: ] [Description: 39S ribosomal protein L28, mitochondrial] [Gene Type: protein-coding]	LOC660709; TcasGA2_TC008271
529	NC_007419.2	7853539	SNV	C	T	Homozygous	23	23	100	1	20	6	0.23	36.3	26	26	14	17		1	1	no	T/T	No	1	87.71	XP_015834678.1:c.[2215G>A]; XP_008192574.1:c.[2212G>A]; XP_972707.2:c.[2215G>A]	XP_015834678.1:p.[Ala739Thr]; XP_008192574.1:p.[Ala738Thr]; XP_972707.2:p.[Ala739Thr]	LOC661459	661459		661459 [Gene Symbol: LOC661459] [Locus Tag: TcasGA2_TC007192] [Chromosome: LG4] [Map Location: ] [Description: transcription factor SPT20 homolog] [Gene Type: protein-coding]	LOC661459; TcasGA2_TC007192
530	NC_007419.2	7868809	SNV	C	T	Homozygous	19	20	95	1	10	10	0.5	38.63	20	21	12	12		0.99	1	no	T/T	No	1	50.04	XP_015834679.1:c.1981C>T	XP_015834679.1:p.His661Tyr	LOC103312777	103312777		103312777 [Gene Symbol: LOC103312777] [Locus Tag: TcasGA2_TC008283] [Chromosome: LG4] [Map Location: ] [Description: uncharacterized LOC103312777] [Gene Type: protein-coding]	TcasGA2_TC008283; LOC103312777
531	NC_007419.2	7869526	SNV	G	T	Homozygous	20	20	100	1	12	11	0.48	38.1	23	23	9	13		1	1	no	T/T	No	1	81.7	XP_015834679.1:c.2602G>T	XP_015834679.1:p.Gly868Cys	LOC103312777	103312777		103312777 [Gene Symbol: LOC103312777] [Locus Tag: TcasGA2_TC008283] [Chromosome: LG4] [Map Location: ] [Description: uncharacterized LOC103312777] [Gene Type: protein-coding]	TcasGA2_TC008283; LOC103312777
532	NC_007419.2	7879259	SNV	G	C	Homozygous	21	22	95.45	1	12	12	0.5	36.71	24	25	9	12		1	1	no	C/C	No	1	54.89	XP_015834337.1:c.1688C>G	XP_015834337.1:p.Thr563Arg	LOC661718	661718		661718 [Gene Symbol: LOC661718] [Locus Tag: TcasGA2_TC007187] [Chromosome: LG4] [Map Location: ] [Description: uncharacterized LOC661718] [Gene Type: protein-coding]	LOC661718; TcasGA2_TC007187
533	NC_007419.2	7880940	SNV	G	C	Heterozygous	12	20	60	1	3	10	0.23	36.33	13	21	7	11	0.31	0.99	1	no	C/G	No	1	58.96	XP_015834337.1:c.231C>G	XP_015834337.1:p.Phe77Leu	LOC661718	661718		661718 [Gene Symbol: LOC661718] [Locus Tag: TcasGA2_TC007187] [Chromosome: LG4] [Map Location: ] [Description: uncharacterized LOC661718] [Gene Type: protein-coding]	LOC661718; TcasGA2_TC007187
534	NC_007419.2	7885240..7885241	MNV	GG	CA	Homozygous	23	23	100	1	11	14	0.44	39.2	25	25	19	20		1	1	no	CA/CA	No	1	200	XP_973063.1:c.288_289delCCinsTG	XP_973063.1:p.Gln97Glu	LOC661837	661837		661837 [Gene Symbol: LOC661837] [Locus Tag: TcasGA2_TC032875] [Chromosome: LG4] [Map Location: ] [Description: lipase 1-like] [Gene Type: protein-coding]	LOC661837; TcasGA2_TC032875
535	NC_007419.2	7889231	SNV	A	G	Homozygous	19	21	90.48	1	9	12	0.43	38.53	21	24	10	13		0.99	1	no	G/G	No	1	25.11	XP_008192578.1:c.1027T>C	XP_008192578.1:p.*343Arg	LOC661923	661923		661923 [Gene Symbol: LOC661923] [Locus Tag: ] [Chromosome: LG4] [Map Location: ] [Description: lipase 3-like] [Gene Type: protein-coding]	LOC661923
536	NC_007419.2	7889237	SNV	T	C	Homozygous	19	21	90.48	1	9	12	0.43	38.47	21	24	10	13		1	1	no	C/C	No	1	25.43	XP_008192578.1:c.1021A>G	XP_008192578.1:p.Ile341Val	LOC661923	661923		661923 [Gene Symbol: LOC661923] [Locus Tag: ] [Chromosome: LG4] [Map Location: ] [Description: lipase 3-like] [Gene Type: protein-coding]	LOC661923
537	NC_007419.2	8095610	SNV	G	C	Heterozygous	15	20	75	0.99	0	15	0	39.4	15	20	5	7	1.79	0.26	0.16	no	C/G	No	1	20.63	XP_015834616.1:c.[2782C>G]; XP_008192609.1:c.[2782C>G]; XP_008192606.1:c.[2782C>G]; XP_008192610.1:c.[2782C>G]; XP_008192607.1:c.[2782C>G]; XP_008192605.1:c.[2782C>G]; XP_008192611.1:c.[2782C>G]; XP_015834615.1:c.[2782C>G]	XP_015834616.1:p.[Gln928Glu]; XP_008192609.1:p.[Gln928Glu]; XP_008192606.1:p.[Gln928Glu]; XP_008192610.1:p.[Gln928Glu]; XP_008192607.1:p.[Gln928Glu]; XP_008192605.1:p.[Gln928Glu]; XP_008192611.1:p.[Gln928Glu]; XP_015834615.1:p.[Gln928Glu]	LOC661354	661354		661354 [Gene Symbol: LOC661354] [Locus Tag: TcasGA2_TC007173] [Chromosome: LG4] [Map Location: ] [Description: spectrin beta chain] [Gene Type: protein-coding]	LOC661354; TcasGA2_TC007173
538	NC_007419.2	8126475	SNV	C	T	Homozygous	20	22	90.91	1	6	14	0.3	37.2	20	22	12	17		1	1	no	T/T	No	1	24.2	XP_008192480.2:c.50C>T	XP_008192480.2:p.Ala17Val	LOC662703	662703		662703 [Gene Symbol: LOC662703] [Locus Tag: TcasGA2_TC008300] [Chromosome: LG4] [Map Location: ] [Description: 1,5-anhydro-D-fructose reductase] [Gene Type: protein-coding]	TcasGA2_TC008300; LOC662703
539	NC_007419.2	8283163	SNV	T	C	Heterozygous	20	30	66.67	1	7	13	0.35	38.45	20	33	10	10	1.08	0.81	0.92	no	C/T	No	1	56.57	XP_974173.2:c.[590-10723T>C]; XP_015835010.1:c.[280+236A>G]; XP_015835009.1:c.[470A>G]	XP_015835009.1:p.Asn157Ser	LOC663015, LOC107397843	663015 , 107397843		663015 [Gene Symbol: LOC663015] [Locus Tag: TcasGA2_TC008308] [Chromosome: LG4] [Map Location: ] [Description: carbonic anhydrase-related protein 10] [Gene Type: protein-coding] || 107397843 [Gene Symbol: LOC107397843] [Locus Tag: TcasGA2_TC031112] [Chromosome: LG4] [Map Location: ] [Description: uncharacterized LOC107397843] [Gene Type: protein-coding]	LOC663015; TcasGA2_TC008308 || TcasGA2_TC031112; LOC107397843
540	NC_007419.2	8434529	SNV	A	C	Heterozygous	6	21	28.57	1	0	6	0	38.17	6	22	3	3	0.12	0.98	0.52	no	A/C	No	1	31.43	XP_974574.1:c.941A>C	XP_974574.1:p.Lys314Thr	LOC663435	663435		663435 [Gene Symbol: LOC663435] [Locus Tag: TcasGA2_TC008318] [Chromosome: LG4] [Map Location: ] [Description: actin related protein 11] [Gene Type: protein-coding]	TcasGA2_TC008318; LOC663435; Arp11
541	NC_007419.2	8472499	SNV	T	C	Homozygous	35	35	100	1	16	29	0.36	36.31	45	45	19	21		1	1	no	C/C	No	1	125.24	XP_015834761.1:c.[1061T>C]; XP_015834758.1:c.[1151T>C]; XP_008192646.1:c.[857T>C]; XP_015834764.1:c.[965T>C]; XP_015834759.1:c.[1109T>C]; XP_015834757.1:c.[1151T>C]; XP_015834767.1:c.[1151T>C]; XP_015834763.1:c.[977T>C]; XP_015834765.1:c.[965T>C]; XP_015834762.1:c.[1043T>C]; XP_015834760.1:c.[1085T>C]; XP_008192645.1:c.[857T>C]; XP_015834769.1:c.[716T>C]; XP_015834766.1:c.[1151T>C]; XP_015834768.…	XP_015834761.1:p.[Ile354Thr]; XP_015834758.1:p.[Ile384Thr]; XP_008192646.1:p.[Ile286Thr]; XP_015834764.1:p.[Ile322Thr]; XP_015834759.1:p.[Ile370Thr]; XP_015834757.1:p.[Ile384Thr]; XP_015834767.1:p.[Ile384Thr]; XP_015834763.1:p.[Ile326Thr]; XP_015834765.1:p.[Ile322Thr]; XP_015834762.1:p.[Ile348Thr]; XP_015834760.1:p.[Ile362Thr]; XP_008192645.1:p.[Ile286Thr]; XP_015834769.1:p.[Ile239Thr]; XP_015834…	LOC663563	663563		663563 [Gene Symbol: LOC663563] [Locus Tag: TcasGA2_TC008323] [Chromosome: LG4] [Map Location: ] [Description: uncharacterized LOC663563] [Gene Type: protein-coding]	TcasGA2_TC008323; LOC663563
542	NC_007419.2	8690097	SNV	A	G	Heterozygous	10	32	31.25	1	5	8	0.38	39.1	13	35	6	7	0.51	0.17	0.79	no	A/G	No	1	56.04	XP_015834829.1:c.73A>G	XP_015834829.1:p.Ile25Val	LOC107397807	107397807		107397807 [Gene Symbol: LOC107397807] [Locus Tag: ] [Chromosome: LG4] [Map Location: ] [Description: probable DNA polymerase] [Gene Type: protein-coding]	LOC107397807
543	NC_007419.2	8690226	Deletion	T	-	Heterozygous	6	20	30	1	4	3	0.43	38	7	23	4	4	-0.12	0.28	1	no	-/T	Yes	6	32.58	XP_015834829.1:c.202delT	XP_015834829.1:p.Pro70fs	LOC107397807	107397807		107397807 [Gene Symbol: LOC107397807] [Locus Tag: ] [Chromosome: LG4] [Map Location: ] [Description: probable DNA polymerase] [Gene Type: protein-coding]	LOC107397807
544	NC_007419.2	8691007^8691008	Insertion	-	TT	Heterozygous	7	22	31.82	1	4	6	0.4	35.36	10	27	5	6	-3.65	0.05	0.48	no	complex	Yes	7	200	XP_015834829.1:c.983_984insTT	XP_015834829.1:p.Gly331fs	LOC107397807	107397807		107397807 [Gene Symbol: LOC107397807] [Locus Tag: ] [Chromosome: LG4] [Map Location: ] [Description: probable DNA polymerase] [Gene Type: protein-coding]	LOC107397807
545	NC_007419.2	8691177	SNV	G	A	Heterozygous	14	49	28.57	1	11	9	0.45	39.29	20	55	12	14	1.34	0.69	1	no	A/G	No	1	54.6	XP_015834829.1:c.1153G>A	XP_015834829.1:p.Asp385Asn	LOC107397807	107397807		107397807 [Gene Symbol: LOC107397807] [Locus Tag: ] [Chromosome: LG4] [Map Location: ] [Description: probable DNA polymerase] [Gene Type: protein-coding]	LOC107397807
546	NC_007419.2	8691213	SNV	G	A	Heterozygous	13	56	23.21	0.99	10	3	0.23	38.85	13	62	7	8	-0.37	0.04	0.97	no	A/G	No	1	22.33	XP_015834829.1:c.1189G>A	XP_015834829.1:p.Val397Ile	LOC107397807	107397807		107397807 [Gene Symbol: LOC107397807] [Locus Tag: ] [Chromosome: LG4] [Map Location: ] [Description: probable DNA polymerase] [Gene Type: protein-coding]	LOC107397807
547	NC_007419.2	8691216	SNV	A	T	Homozygous	56	56	100	1	45	17	0.27	39.34	62	62	36	38		1	1	no	T/T	No	1	159.55	XP_015834829.1:c.1192A>T	XP_015834829.1:p.Met398Leu	LOC107397807	107397807		107397807 [Gene Symbol: LOC107397807] [Locus Tag: ] [Chromosome: LG4] [Map Location: ] [Description: probable DNA polymerase] [Gene Type: protein-coding]	LOC107397807
548	NC_007419.2	8691243	SNV	G	A	Heterozygous	18	53	33.96	1	11	9	0.45	39.17	20	63	11	10	0.58	0.67	0.75	no	A/G	No	1	94.35	XP_015834829.1:c.1219G>A	XP_015834829.1:p.Val407Ile	LOC107397807	107397807		107397807 [Gene Symbol: LOC107397807] [Locus Tag: ] [Chromosome: LG4] [Map Location: ] [Description: probable DNA polymerase] [Gene Type: protein-coding]	LOC107397807
549	NC_007419.2	8691265	SNV	G	A	Heterozygous	15	48	31.25	1	12	10	0.45	39.2	22	64	9	11	0.02	0.73	0.99	no	A/G	No	1	70.11	XP_015834829.1:c.1241G>A	XP_015834829.1:p.Gly414Asp	LOC107397807	107397807		107397807 [Gene Symbol: LOC107397807] [Locus Tag: ] [Chromosome: LG4] [Map Location: ] [Description: probable DNA polymerase] [Gene Type: protein-coding]	LOC107397807
550	NC_007419.2	8691333	SNV	C	T	Heterozygous	19	50	38	1	12	8	0.4	39.21	20	55	14	16	1.2	0.24	0.67	no	C/T	No	1	118.04	XP_015834829.1:c.1309C>T	XP_015834829.1:p.Pro437Ser	LOC107397807	107397807		107397807 [Gene Symbol: LOC107397807] [Locus Tag: ] [Chromosome: LG4] [Map Location: ] [Description: probable DNA polymerase] [Gene Type: protein-coding]	LOC107397807
551	NC_007419.2	8691343	SNV	G	A	Heterozygous	12	54	22.22	0.97	8	4	0.33	39.25	12	60	8	10	1.54	0.36	0.55	no	A/G	No	1	15.33	XP_015834829.1:c.1319G>A	XP_015834829.1:p.Arg440His	LOC107397807	107397807		107397807 [Gene Symbol: LOC107397807] [Locus Tag: ] [Chromosome: LG4] [Map Location: ] [Description: probable DNA polymerase] [Gene Type: protein-coding]	LOC107397807
552	NC_007419.2	8691358	SNV	C	T	Heterozygous	12	56	21.43	0.9	4	9	0.31	38.25	13	61	7	8	0.15	0.72	0.71	no	C/T	No	1	10.03	XP_015834829.1:c.1334C>T	XP_015834829.1:p.Thr445Ile	LOC107397807	107397807		107397807 [Gene Symbol: LOC107397807] [Locus Tag: ] [Chromosome: LG4] [Map Location: ] [Description: probable DNA polymerase] [Gene Type: protein-coding]	LOC107397807
553	NC_007419.2	8691396	SNV	G	A	Heterozygous	16	63	25.4	1	14	2	0.12	38.94	16	71	9	13	0.62	0.18	0.09	no	A/G	No	1	40.94	XP_015834829.1:c.1372G>A	XP_015834829.1:p.Gly458Ser	LOC107397807	107397807		107397807 [Gene Symbol: LOC107397807] [Locus Tag: ] [Chromosome: LG4] [Map Location: ] [Description: probable DNA polymerase] [Gene Type: protein-coding]	LOC107397807
554	NC_007419.2	8691412	SNV	T	G	Homozygous	49	57	85.96	1	31	24	0.44	38.47	55	65	31	34		1	1	no	G/G	No	1	47.56	XP_015834829.1:c.1388T>G	XP_015834829.1:p.Leu463Arg	LOC107397807	107397807		107397807 [Gene Symbol: LOC107397807] [Locus Tag: ] [Chromosome: LG4] [Map Location: ] [Description: probable DNA polymerase] [Gene Type: protein-coding]	LOC107397807
555	NC_007419.2	8691416	SNV	A	T	Heterozygous	21	52	40.38	1	11	14	0.44	39.86	25	61	15	15	1.96	0.84	0.89	no	A/T	No	1	135.82	XP_015834829.1:c.1392A>T	XP_015834829.1:p.Leu464Phe	LOC107397807	107397807		107397807 [Gene Symbol: LOC107397807] [Locus Tag: ] [Chromosome: LG4] [Map Location: ] [Description: probable DNA polymerase] [Gene Type: protein-coding]	LOC107397807
556	NC_007419.2	8691520	SNV	A	G	Homozygous	61	68	89.71	1	29	40	0.42	38.23	69	82	37	40		1	1	no	G/G	No	1	87.38	XP_015834829.1:c.1496A>G	XP_015834829.1:p.Tyr499Cys	LOC107397807	107397807		107397807 [Gene Symbol: LOC107397807] [Locus Tag: ] [Chromosome: LG4] [Map Location: ] [Description: probable DNA polymerase] [Gene Type: protein-coding]	LOC107397807
557	NC_007419.2	8691532	SNV	T	C	Homozygous	62	69	89.86	1	31	36	0.46	38.39	67	79	38	41		1	1	no	C/C	No	1	90.34	XP_015834829.1:c.1508T>C	XP_015834829.1:p.Leu503Pro	LOC107397807	107397807		107397807 [Gene Symbol: LOC107397807] [Locus Tag: ] [Chromosome: LG4] [Map Location: ] [Description: probable DNA polymerase] [Gene Type: protein-coding]	LOC107397807
558	NC_007419.2	8691555	Deletion	A	-	Heterozygous	30	74	40.54	1	19	12	0.39	37.43	31	84	20	21	-0.61	0.54	0.49	no	-/A	Yes	6	200	XP_015834829.1:c.1531delA	XP_015834829.1:p.Lys512fs	LOC107397807	107397807		107397807 [Gene Symbol: LOC107397807] [Locus Tag: ] [Chromosome: LG4] [Map Location: ] [Description: probable DNA polymerase] [Gene Type: protein-coding]	LOC107397807
559	NC_007419.2	8691580	SNV	A	T	Heterozygous	26	63	41.27	1	14	13	0.48	36.73	27	74	20	19	-0.47	0.33	0.82	no	A/T	No	1	200	XP_015834829.1:c.1556A>T	XP_015834829.1:p.Tyr519Phe	LOC107397807	107397807		107397807 [Gene Symbol: LOC107397807] [Locus Tag: ] [Chromosome: LG4] [Map Location: ] [Description: probable DNA polymerase] [Gene Type: protein-coding]	LOC107397807
560	NC_007419.2	8691586	Deletion	A	-	Heterozygous	24	57	42.11	1	13	12	0.48	37.08	25	67	18	17	-0.92	0.61	0.82	no	-/A	Yes	5	156.54	XP_015834829.1:c.1562delA	XP_015834829.1:p.Glu523fs	LOC107397807	107397807		107397807 [Gene Symbol: LOC107397807] [Locus Tag: ] [Chromosome: LG4] [Map Location: ] [Description: probable DNA polymerase] [Gene Type: protein-coding]	LOC107397807
561	NC_007419.2	8914080	SNV	T	C	Heterozygous	5	22	22.73	0.98	4	1	0.2	37.8	5	23	3	3	0.74	0.08	0.25	no	C/T	No	1	16.45	XP_975065.2:c.[40+2645T>C]; XP_015834885.1:c.[3944A>G]	XP_015834885.1:p.Asn1315Ser	LOC663945, LOC100142143	663945 , 100142143		663945 [Gene Symbol: LOC663945] [Locus Tag: TcasGA2_TC008349] [Chromosome: LG4] [Map Location: ] [Description: RWD domain-containing protein 2A] [Gene Type: protein-coding] || 100142143 [Gene Symbol: LOC100142143] [Locus Tag: ] [Chromosome: LG4] [Map Location: ] [Description: uncharacterized LOC100142143] [Gene Type: protein-coding]	LOC663945; TcasGA2_TC008349 || LOC100142143
562	NC_007419.2	8917864	SNV	G	A	Homozygous	20	20	100	1	8	13	0.38	39.85	21	21	11	12		1	1	no	A/A	No	1	81.69	XP_015834885.1:c.[482C>T]; XP_975065.2:c.[41-251G>A]	XP_015834885.1:p.Ser161Leu	LOC663945, LOC100142143	663945 , 100142143		663945 [Gene Symbol: LOC663945] [Locus Tag: TcasGA2_TC008349] [Chromosome: LG4] [Map Location: ] [Description: RWD domain-containing protein 2A] [Gene Type: protein-coding] || 100142143 [Gene Symbol: LOC100142143] [Locus Tag: ] [Chromosome: LG4] [Map Location: ] [Description: uncharacterized LOC100142143] [Gene Type: protein-coding]	LOC663945; TcasGA2_TC008349 || LOC100142143
563	NC_007419.2	8955581	SNV	G	A	Heterozygous	9	23	39.13	1	8	2	0.2	36.56	10	32	6	6	-0.69	0.48	0.73	no	A/G	No	1	63.52	XP_015834655.1:c.[476G>A]; XP_015834654.1:c.[503G>A]; XP_015834656.1:c.[476G>A]	XP_015834655.1:p.[Arg159Gln]; XP_015834654.1:p.[Arg168Gln]; XP_015834656.1:p.[Arg159Gln]	LOC107397770	107397770		107397770 [Gene Symbol: LOC107397770] [Locus Tag: TcasGA2_TC008352] [Chromosome: LG4] [Map Location: ] [Description: uncharacterized LOC107397770] [Gene Type: protein-coding]	TcasGA2_TC008352; LOC107397770
564	NC_007419.2	8955601	SNV	G	A	Heterozygous	10	26	38.46	1	6	8	0.43	35.6	14	34	6	5	-1.08	0.3	0.94	no	A/G	No	1	68.01	XP_015834654.1:c.[523G>A]; XP_015834655.1:c.[496G>A]; XP_015834656.1:c.[496G>A]	XP_015834654.1:p.[Asp175Asn]; XP_015834655.1:p.[Asp166Asn]; XP_015834656.1:p.[Asp166Asn]	LOC107397770	107397770		107397770 [Gene Symbol: LOC107397770] [Locus Tag: TcasGA2_TC008352] [Chromosome: LG4] [Map Location: ] [Description: uncharacterized LOC107397770] [Gene Type: protein-coding]	TcasGA2_TC008352; LOC107397770
565	NC_007419.2	9231780	SNV	A	G	Heterozygous	11	20	55	1	6	5	0.45	36.36	11	20	8	6	-1.86	0.04	0.65	no	A/G	No	1	71.68	XP_015834691.1:c.[1657T>C]; XP_015834690.1:c.[1657T>C]	XP_015834691.1:p.[Ser553Pro]; XP_015834690.1:p.[Ser553Pro]	LOC664279	664279		664279 [Gene Symbol: LOC664279] [Locus Tag: TcasGA2_TC007111] [Chromosome: LG4] [Map Location: ] [Description: YLP motif-containing protein 1] [Gene Type: protein-coding]	TcasGA2_TC007111; LOC664279
566	NC_007419.2	9633889	SNV	C	G	Heterozygous	18	24	75	0.99	9	10	0.47	37.83	19	25	9	10	1.1	0.9	0.98	no	C/G	No	1	22.15	XP_008192759.1:c.[84C>G]; XP_008192760.1:c.[78C>G]; XP_008192762.1:c.[84C>G]	XP_008192759.1:p.[Asp28Glu]; XP_008192760.1:p.[Asp26Glu]; XP_008192762.1:p.[Asp28Glu]	LOC103312841	103312841		103312841 [Gene Symbol: LOC103312841] [Locus Tag: TcasGA2_TC008388] [Chromosome: LG4] [Map Location: ] [Description: protein CHROMATIN REMODELING 20] [Gene Type: protein-coding]	LOC103312841; TcasGA2_TC008388
567	NC_007419.2	9643389	SNV	A	G	Heterozygous	16	24	66.67	1	7	9	0.44	37.5	16	24	8	11	0.03	0.86	0.99	no	A/G	No	1	47.95	XP_008192763.1:c.832T>C	XP_008192763.1:p.Ser278Pro	LOC655851	655851		655851 [Gene Symbol: LOC655851] [Locus Tag: TcasGA2_TC007093] [Chromosome: LG4] [Map Location: ] [Description: protein YIPF1] [Gene Type: protein-coding]	LOC655851; TcasGA2_TC007093
568	NC_007419.2	9673183	SNV	A	G	Heterozygous	7	21	33.33	1	4	3	0.43	39.29	7	21	3	4	0.71	0.12	0.9	no	A/G	No	1	44.46	XP_968130.4:c.2159A>G	XP_968130.4:p.Gln720Arg	LOC656511	656511		656511 [Gene Symbol: LOC656511] [Locus Tag: TcasGA2_TC008395] [Chromosome: LG4] [Map Location: LG4|LG4] [Description: hypothetical protein] [Gene Type: protein-coding]	LOC656511; TcasGA2_TC008395
569	NC_007419.2	9716823	SNV	C	T	Homozygous	21	21	100	1	12	9	0.43	38.1	21	21	10	12		1	1	no	T/T	No	1	84.7	XP_008192771.1:c.[1618G>A]; XP_015834346.1:c.[1369G>A]; XP_008192769.1:c.[1708G>A]; XP_008192770.1:c.[1618G>A]; XP_008192775.1:c.[1369G>A]; XP_015834345.1:c.[1516G>A]; XP_008192774.1:c.[1537G>A]; XP_015834344.1:c.[1543G>A]; XP_008192772.1:c.[1618G>A]	XP_008192771.1:p.[Ala540Thr]; XP_015834346.1:p.[Ala457Thr]; XP_008192769.1:p.[Ala570Thr]; XP_008192770.1:p.[Ala540Thr]; XP_008192775.1:p.[Ala457Thr]; XP_015834345.1:p.[Ala506Thr]; XP_008192774.1:p.[Ala513Thr]; XP_015834344.1:p.[Ala515Thr]; XP_008192772.1:p.[Ala540Thr]	LOC657019	657019		657019 [Gene Symbol: LOC657019] [Locus Tag: TcasGA2_TC007088] [Chromosome: LG4] [Map Location: ] [Description: apoptosis-stimulating of p53 protein 1] [Gene Type: protein-coding]	LOC657019; TcasGA2_TC007088
570	NC_007419.2	9808947	SNV	G	A	Homozygous	26	26	100	1	19	8	0.3	37.69	27	27	12	19		1	1	no	A/A	No	1	99.74	XP_008192769.1:c.[75+899C>T]; XP_001809578.1:c.[325G>A]	XP_001809578.1:p.Ala109Thr	LOC657019, LOC100142512	657019 , 100142512		657019 [Gene Symbol: LOC657019] [Locus Tag: TcasGA2_TC007088] [Chromosome: LG4] [Map Location: ] [Description: apoptosis-stimulating of p53 protein 1] [Gene Type: protein-coding] || 100142512 [Gene Symbol: LOC100142512] [Locus Tag: TcasGA2_TC008401] [Chromosome: LG4] [Map Location: ] [Description: cuticle protein CP14.6] [Gene Type: protein-coding]	LOC657019; TcasGA2_TC007088 || LOC100142512; TcasGA2_TC008401
571	NC_007419.2	9980337	SNV	T	C	Homozygous	24	24	100	1	10	19	0.34	37.92	29	29	14	13		1	1	no	C/C	No	1	92.15	XP_008192894.1:c.4372A>G	XP_008192894.1:p.Thr1458Ala	LOC103312877	103312877		103312877 [Gene Symbol: LOC103312877] [Locus Tag: TcasGA2_TC007081] [Chromosome: LG4] [Map Location: ] [Description: uncharacterized LOC103312877] [Gene Type: protein-coding]	TcasGA2_TC007081; LOC103312877; Nasrat
572	NC_007419.2	10095615	SNV	G	A	Homozygous	20	20	100	1	8	17	0.32	38.65	25	25	9	10		1	1	no	A/A	No	1	81.68	XP_015834339.1:c.1774G>A	XP_015834339.1:p.Asp592Asn	LOC100141557	100141557		100141557 [Gene Symbol: LOC100141557] [Locus Tag: TcasGA2_TC008427] [Chromosome: LG4] [Map Location: ] [Description: uncharacterized LOC100141557] [Gene Type: protein-coding]	LOC100141557; TcasGA2_TC008427
573	NC_007419.2	10116192	SNV	C	T	Homozygous	20	20	100	1	12	10	0.45	37.5	22	22	14	17		1	1	no	T/T	No	1	81.7	XP_008192826.1:c.239G>A	XP_008192826.1:p.Arg80Lys	LOC103312855	103312855		103312855 [Gene Symbol: LOC103312855] [Locus Tag: TcasGA2_TC032936] [Chromosome: LG4] [Map Location: ] [Description: monocarboxylate transporter 4-like] [Gene Type: protein-coding]	LOC103312855; TcasGA2_TC032936
574	NC_007419.2	10263515	SNV	G	T	Heterozygous	12	43	27.91	1	9	4	0.31	39.17	13	51	9	9	1.49	0.28	0.39	no	G/T	No	1	42.48	XP_015834340.1:c.413C>A	XP_015834340.1:p.Thr138Asn	LOC107397719	107397719		107397719 [Gene Symbol: LOC107397719] [Locus Tag: ] [Chromosome: LG4] [Map Location: ] [Description: odorant receptor Or1-like] [Gene Type: protein-coding]	LOC107397719
575	NC_007419.2	10263584	SNV	C	G	Heterozygous	9	20	45	1	7	2	0.22	38.78	9	24	5	7	2.92	0.23	0.61	no	C/G	No	1	71.7	XP_015834340.1:c.344G>C	XP_015834340.1:p.Gly115Ala	LOC107397719	107397719		107397719 [Gene Symbol: LOC107397719] [Locus Tag: ] [Chromosome: LG4] [Map Location: ] [Description: odorant receptor Or1-like] [Gene Type: protein-coding]	LOC107397719
576	NC_007419.2	10530184	SNV	C	G	Heterozygous	5	21	23.81	0.98	2	3	0.4	34.2	5	22	3	2	-0.95	0.32	0.61	no	C/G	No	1	17.89	XP_015835042.1:c.[1196G>C]; XP_015835041.1:c.[1196G>C]; XP_015835043.1:c.[1196G>C]; XP_973327.1:c.[1196G>C]; XP_015835039.1:c.[1196G>C]; XP_015835040.1:c.[1196G>C]	XP_015835042.1:p.[Arg399Pro]; XP_015835041.1:p.[Arg399Pro]; XP_015835043.1:p.[Arg399Pro]; XP_973327.1:p.[Arg399Pro]; XP_015835039.1:p.[Arg399Pro]; XP_015835040.1:p.[Arg399Pro]	LOC662117	662117		662117 [Gene Symbol: LOC662117] [Locus Tag: TcasGA2_TC007053] [Chromosome: LG4] [Map Location: ] [Description: leucine-rich repeat-containing protein 24] [Gene Type: protein-coding]	LOC662117; TcasGA2_TC007053
577	NC_007419.2	10624018	SNV	C	T	Heterozygous	6	22	27.27	1	6	1	0.14	39.83	7	26	2	4	1.88	0.08	0.19	no	C/T	No	1	27.91	XP_008192848.1:c.553G>A	XP_008192848.1:p.Val185Ile	LOC662150	662150		662150 [Gene Symbol: LOC662150] [Locus Tag: TcasGA2_TC007050] [Chromosome: LG4] [Map Location: ] [Description: cell adhesion molecule 3] [Gene Type: protein-coding]	TcasGA2_TC007050; LOC662150; beat-IIIc
578	NC_007419.2	11190390	SNV	T	A	Homozygous	21	21	100	1	6	19	0.24	37.52	25	25	11	11		1	1	no	A/A	No	1	84.7	XP_974377.1:c.39T>A	XP_974377.1:p.Phe13Leu	LOC663227	663227		663227 [Gene Symbol: LOC663227] [Locus Tag: TcasGA2_TC008478] [Chromosome: LG4] [Map Location: ] [Description: 28S ribosomal protein S27, mitochondrial] [Gene Type: protein-coding]	LOC663227; TcasGA2_TC008478
579	NC_007419.2	11190395..11190396	MNV	AG	CA	Homozygous	21	21	100	1	6	21	0.22	36.93	27	27	17	15		1	1	no	CA/CA	No	1	200	XP_974377.1:c.44_45delAGinsCA	XP_974377.1:p.Lys15Thr	LOC663227	663227		663227 [Gene Symbol: LOC663227] [Locus Tag: TcasGA2_TC008478] [Chromosome: LG4] [Map Location: ] [Description: 28S ribosomal protein S27, mitochondrial] [Gene Type: protein-coding]	LOC663227; TcasGA2_TC008478
580	NC_007419.2	11307339	SNV	C	T	Homozygous	17	20	85	0.55	12	8	0.4	37.18	20	23	11	9		0.85	1	no	T/T	No	1	3.45	XP_015834710.1:c.[1066G>A]; XP_015834708.1:c.[1066-22715G>A]; XP_015834711.1:c.[1066G>A]; XP_015834709.1:c.[1066-22715G>A]	XP_015834710.1:p.[Ala356Thr]; XP_015834711.1:p.[Ala356Thr]	LOC663398, LOC103312871	663398 , 103312871		663398 [Gene Symbol: LOC663398] [Locus Tag: ] [Chromosome: LG4] [Map Location: ] [Description: transient receptor potential-gamma protein] [Gene Type: protein-coding] || 103312871 [Gene Symbol: LOC103312871] [Locus Tag: TcasGA2_TC032905] [Chromosome: LG4] [Map Location: ] [Description: sphingomyelin phosphodiesterase-like] [Gene Type: protein-coding]	TRPL; LOC663398 || TcasGA2_TC032905; LOC103312871
581	NC_007419.2	11360726	SNV	T	C	Heterozygous	16	22	72.73	1	4	12	0.25	39	16	22	9	8	0.81	0.74	0.95	no	C/T	No	1	27.94	XP_015834713.1:c.755T>C	XP_015834713.1:p.Leu252Pro	LOC107397784	107397784		107397784 [Gene Symbol: LOC107397784] [Locus Tag: TcasGA2_TC008482] [Chromosome: LG4] [Map Location: ] [Description: uncharacterized LOC107397784] [Gene Type: protein-coding]	TcasGA2_TC008482; LOC107397784
582	NC_007419.2	11404036	SNV	G	A	Heterozygous	6	20	30	1	4	5	0.44	37.33	9	23	5	4	-0.62	0.99	1	no	A/G	No	1	33.68	NP_001073624.1:c.[250G>A]; XP_008192741.1:c.[250G>A]	NP_001073624.1:p.[Asp84Asn]; XP_008192741.1:p.[Asp84Asn]	Stip	663492	Sip1/TFIP11 interacting protein	663492 [Gene Symbol: Stip] [Locus Tag: TcasGA2_TC008486] [Chromosome: LG4] [Map Location: ] [Description: Sip1/TFIP11 interacting protein] [Gene Type: protein-coding]	Stip; TcasGA2_TC008486
583	NC_007419.2	11515892	SNV	G	A	Homozygous	20	21	95.24	1	16	10	0.38	37.75	26	27	12	13		1	1	no	A/A	No	1	53.18	XP_015834342.1:c.47C>T	XP_015834342.1:p.Ser16Phe	LOC103312883	103312883		103312883 [Gene Symbol: LOC103312883] [Locus Tag: TcasGA2_TC007022] [Chromosome: LG4] [Map Location: ] [Description: piggyBac transposable element-derived protein 4] [Gene Type: protein-coding]	LOC103312883; TcasGA2_TC007022
584	NC_007419.2	11557552	SNV	T	C	Heterozygous	30	45	66.67	1	20	10	0.33	37.8	30	45	14	22	0.61	0.55	0.54	no	C/T	No	1	78.41	XP_015835130.1:c.701T>C	XP_015835130.1:p.Val234Ala	LOC107397869	107397869		107397869 [Gene Symbol: LOC107397869] [Locus Tag: TcasGA2_TC032951] [Chromosome: LG4] [Map Location: ] [Description: uncharacterized LOC107397869] [Gene Type: protein-coding]	LOC107397869; TcasGA2_TC032951
585	NC_007419.2	11564192	SNV	G	A	Heterozygous	6	24	25	0.99	6	0	0	37.83	6	24	3	5	1.3	0.95	1	no	A/G	No	1	22.57	XP_015835131.1:c.565G>A	XP_015835131.1:p.Val189Ile	LOC107397870	107397870		107397870 [Gene Symbol: LOC107397870] [Locus Tag: ] [Chromosome: LG4] [Map Location: ] [Description: uncharacterized LOC107397870] [Gene Type: protein-coding]	LOC107397870
586	NC_007419.2	11564200	Deletion	A	-	Homozygous	22	22	100	1	22	0	0	35.32	22	22	12	14		1	1	no	-/-	No	1	96.73	XP_015835131.1:c.573delA	XP_015835131.1:p.Asn193fs	LOC107397870	107397870		107397870 [Gene Symbol: LOC107397870] [Locus Tag: ] [Chromosome: LG4] [Map Location: ] [Description: uncharacterized LOC107397870] [Gene Type: protein-coding]	LOC107397870
587	NC_007419.2	11564210	SNV	C	T	Heterozygous	6	23	26.09	1	5	1	0.17	33.67	6	24	5	6	-1.4	0.35	0.9	no	C/T	No	1	25.23	XP_015835131.1:c.583C>T	XP_015835131.1:p.Arg195Cys	LOC107397870	107397870		107397870 [Gene Symbol: LOC107397870] [Locus Tag: ] [Chromosome: LG4] [Map Location: ] [Description: uncharacterized LOC107397870] [Gene Type: protein-coding]	LOC107397870
588	NC_007419.2	11564327	SNV	A	G	Heterozygous	29	49	59.18	1	15	14	0.48	36.83	29	53	16	16	1.1	0.3	0.89	no	A/G	No	1	130.78	XP_015835131.1:c.700A>G	XP_015835131.1:p.Thr234Ala	LOC107397870	107397870		107397870 [Gene Symbol: LOC107397870] [Locus Tag: ] [Chromosome: LG4] [Map Location: ] [Description: uncharacterized LOC107397870] [Gene Type: protein-coding]	LOC107397870
589	NC_007419.2	11564336	SNV	A	G	Homozygous	35	43	81.4	0.76	17	22	0.44	37.51	39	47	22	21	-0.11	0.9	0.96	no	G/G	No	1	6.23	XP_015835131.1:c.709A>G	XP_015835131.1:p.Ser237Gly	LOC107397870	107397870		107397870 [Gene Symbol: LOC107397870] [Locus Tag: ] [Chromosome: LG4] [Map Location: ] [Description: uncharacterized LOC107397870] [Gene Type: protein-coding]	LOC107397870
590	NC_007419.2	11564379	SNV	T	C	Heterozygous	25	37	67.57	1	16	9	0.36	38.16	25	37	16	19	0.1	0.92	0.92	no	C/T	No	1	62.54	XP_015835131.1:c.752T>C	XP_015835131.1:p.Val251Ala	LOC107397870	107397870		107397870 [Gene Symbol: LOC107397870] [Locus Tag: ] [Chromosome: LG4] [Map Location: ] [Description: uncharacterized LOC107397870] [Gene Type: protein-coding]	LOC107397870
591	NC_007419.2	12159348	SNV	T	C	Homozygous	20	20	100	1	10	11	0.48	37.4	21	21	11	14		1	1	no	C/C	No	1	80.11	XP_008192461.1:c.650A>G	XP_008192461.1:p.Asn217Ser	LOC103312771	103312771		103312771 [Gene Symbol: LOC103312771] [Locus Tag: TcasGA2_TC007004] [Chromosome: LG4] [Map Location: ] [Description: TNF receptor-associated factor family protein DDB_G0272829] [Gene Type: protein-coding]	LOC103312771; TcasGA2_TC007004
592	NC_007420.3	489104	Deletion	C	-	Homozygous	20	20	100	1	6	15	0.29	34.65	21	21	8	10		1	1	no	-/-	No	1	90.71	XP_008192910.2:c.225delG	XP_008192910.2:p.His76fs	LOC658423	658423		658423 [Gene Symbol: LOC658423] [Locus Tag: TcasGA2_TC013905] [Chromosome: LG5] [Map Location: ] [Description: dnaJ protein homolog 1] [Gene Type: protein-coding]	LOC658423; TcasGA2_TC013905
593	NC_007420.3	946142	SNV	G	T	Homozygous	24	24	100	1	20	10	0.33	36.42	30	30	13	12		1	1	no	T/T	No	1	93.74	XP_015835162.1:c.[83+5125G>T]; XP_015835161.1:c.[1212G>T]	XP_015835161.1:p.Glu404Asp	LOC100142057	100142057		100142057 [Gene Symbol: LOC100142057] [Locus Tag: TcasGA2_TC016312] [Chromosome: LG5] [Map Location: ] [Description: stress response protein NST1] [Gene Type: protein-coding]	LOC100142057; TcasGA2_TC016312
594	NC_007420.3	1482009	SNV	C	T	Homozygous	21	21	100	1	15	12	0.44	37.81	27	27	14	14		1	1	no	T/T	No	1	84.7	XP_001809514.1:c.380G>A	XP_001809514.1:p.Ser127Asn	LOC100141705	100141705		100141705 [Gene Symbol: LOC100141705] [Locus Tag: TcasGA2_TC010910] [Chromosome: LG5] [Map Location: ] [Description: brachyurin] [Gene Type: protein-coding]	LOC100141705; TcasGA2_TC010910; H108
595	NC_007420.3	1646255	SNV	G	C	Heterozygous	17	25	68	1	14	3	0.18	40.12	17	25	11	10	1.14	0.79	0.96	no	C/G	No	1	44.99	XP_001810629.1:c.272G>C	XP_001810629.1:p.Ser91Thr	LOC100142203	100142203		100142203 [Gene Symbol: LOC100142203] [Locus Tag: TcasGA2_TC010945] [Chromosome: LG5] [Map Location: ] [Description: general transcription factor 3C polypeptide 5] [Gene Type: protein-coding]	TcasGA2_TC010945; LOC100142203
596	NC_007420.3	1804614	SNV	T	A	Homozygous	20	20	100	1	16	7	0.3	36.55	23	23	10	12		1	1	no	A/A	No	1	81.69	XP_008199328.1:c.[896-2854A>T]; XP_015835564.1:c.[57T>A]	XP_015835564.1:p.Asn19Lys	LOC100271908, LOC107397944	100271908 , 107397944		100271908 [Gene Symbol: LOC100271908] [Locus Tag: TcasGA2_TC010897] [Chromosome: LG5] [Map Location: ] [Description: vestigial] [Gene Type: protein-coding] || 107397944 [Gene Symbol: LOC107397944] [Locus Tag: TcasGA2_TC010949] [Chromosome: LG5] [Map Location: ] [Description: kinesin-like protein KIF23] [Gene Type: protein-coding]	TcasGA2_TC010897; LOC100271908; Vg || LOC107397944; TcasGA2_TC010949
597	NC_007420.3	1804618	SNV	C	T	Heterozygous	11	21	52.38	1	7	6	0.46	37.45	13	27	5	8	1.97	0.26	1	no	C/T	No	1	82.62	XP_008199328.1:c.[896-2858G>A]; XP_015835564.1:c.[61C>T]	XP_015835564.1:p.Pro21Ser	LOC100271908, LOC107397944	100271908 , 107397944		100271908 [Gene Symbol: LOC100271908] [Locus Tag: TcasGA2_TC010897] [Chromosome: LG5] [Map Location: ] [Description: vestigial] [Gene Type: protein-coding] || 107397944 [Gene Symbol: LOC107397944] [Locus Tag: TcasGA2_TC010949] [Chromosome: LG5] [Map Location: ] [Description: kinesin-like protein KIF23] [Gene Type: protein-coding]	TcasGA2_TC010897; LOC100271908; Vg || LOC107397944; TcasGA2_TC010949
598	NC_007420.3	1908606	SNV	G	C	Heterozygous	9	25	36	1	3	7	0.3	38.11	10	30	4	5	-1.7	0.06	1	no	C/G	No	1	57.72	XP_970755.2:c.2684G>C	XP_970755.2:p.Ser895Thr	LOC659345	659345		659345 [Gene Symbol: LOC659345] [Locus Tag: TcasGA2_TC010952] [Chromosome: LG5] [Map Location: ] [Description: uncharacterized LOC659345] [Gene Type: protein-coding]	TcasGA2_TC010952; LOC659345
599	NC_007420.3	2227074	SNV	C	T	Homozygous	18	20	90	0.99	11	11	0.5	37.78	22	24	11	14		0.98	1	no	T/T	No	1	19.37	XP_015835443.1:c.2080G>A	XP_015835443.1:p.Val694Ile	LOC654869	654869		654869 [Gene Symbol: LOC654869] [Locus Tag: TcasGA2_TC013915] [Chromosome: LG5] [Map Location: ] [Description: diacylglycerol kinase eta] [Gene Type: protein-coding]	TcasGA2_TC013915; LOC654869
600	NC_007420.3	2545905	SNV	G	A	Heterozygous	12	24	50	1	2	10	0.17	34.25	12	24	4	5	-1.65	0.09	0.35	no	A/G	No	1	96.48	XP_967820.1:c.1763G>A	XP_967820.1:p.Ser588Asn	LOC656183	656183		656183 [Gene Symbol: LOC656183] [Locus Tag: TcasGA2_TC013927] [Chromosome: LG5] [Map Location: ] [Description: replication factor C subunit 1] [Gene Type: protein-coding]	LOC656183; TcasGA2_TC013927
601	NC_007420.3	2570997..2570998	MNV	TC	AT	Heterozygous	11	20	55	1	9	7	0.44	37.36	16	25	9	11		0.24	0.9	no	complex	No	1	200	XP_015835259.1:c.[369_370delGAinsAT]; XP_015835258.1:c.[369_370delGAinsAT]	XP_015835259.1:p.[Ser124Cys]; XP_015835258.1:p.[Ser124Cys]	LOC103312894	103312894		103312894 [Gene Symbol: LOC103312894] [Locus Tag: TcasGA2_TC013877] [Chromosome: LG5] [Map Location: ] [Description: uncharacterized LOC103312894] [Gene Type: protein-coding]	LOC103312894; TcasGA2_TC013877
602	NC_007420.3	2625682	SNV	C	T	Heterozygous	12	27	44.44	1	10	2	0.17	38.5	12	27	6	10	-0.71	0.92	1	no	C/T	No	1	90.33	XP_969328.1:c.607G>A	XP_969328.1:p.Asp203Asn	LOC657800	657800		657800 [Gene Symbol: LOC657800] [Locus Tag: TcasGA2_TC013872] [Chromosome: LG5] [Map Location: ] [Description: vacuolar protein sorting-associated protein 37A] [Gene Type: protein-coding]	TcasGA2_TC013872; LOC657800
603	NC_007420.3	2645349	SNV	G	T	Heterozygous	15	23	65.22	1	10	11	0.48	37.93	21	30	5	9	1.1	0.78	1	no	G/T	No	1	51.25	XP_008192953.1:c.3957G>T	XP_008192953.1:p.Leu1319Phe	LOC658038	658038		658038 [Gene Symbol: LOC658038] [Locus Tag: TcasGA2_TC013942] [Chromosome: LG5] [Map Location: ] [Description: dedicator of cytokinesis protein 7] [Gene Type: protein-coding]	LOC658038; TcasGA2_TC013942
604	NC_007420.3	2684199	SNV	A	C	Heterozygous	15	22	68.18	1	3	12	0.2	38.27	15	22	4	10	-0.85	0.95	1	no	A/C	No	1	37.04	XP_008192937.1:c.27T>G	XP_008192937.1:p.Asp9Glu	LOC658579	658579		658579 [Gene Symbol: LOC658579] [Locus Tag: TcasGA2_TC013866] [Chromosome: LG5] [Map Location: ] [Description: transient receptor potential cation channel, subfamily C-like protein] [Gene Type: protein-coding]	LOC658579; GLEAN_13866; TcasGA2_TC013866
605	NC_007420.3	3139883	SNV	T	C	Homozygous	23	23	100	1	15	11	0.42	37.04	26	26	14	17		1	1	no	C/C	No	1	89.13	XP_015835566.1:c.[218A>G]; XP_015835565.1:c.[19+12480T>C]; XP_001810887.1:c.[424+44503T>C]	XP_015835566.1:p.Asn73Ser	LOC659852, LOC107397945	659852 , 107397945		659852 [Gene Symbol: LOC659852] [Locus Tag: TcasGA2_TC013958] [Chromosome: LG5] [Map Location: ] [Description: neuroligin 3] [Gene Type: protein-coding] || 107397945 [Gene Symbol: LOC107397945] [Locus Tag: TcasGA2_TC013846] [Chromosome: LG5] [Map Location: ] [Description: uncharacterized LOC107397945] [Gene Type: protein-coding]	NLG-3; LOC659852; TcasGA2_TC013958 || TcasGA2_TC013846; LOC107397945
606	NC_007420.3	3311443	SNV	T	G	Homozygous	21	21	100	1	10	15	0.4	39.29	25	25	8	13		1	1	no	G/G	No	1	83.1	XP_008192973.1:c.2291T>G	XP_008192973.1:p.Val764Gly	LOC103312902	103312902		103312902 [Gene Symbol: LOC103312902] [Locus Tag: TcasGA2_TC013973] [Chromosome: LG5] [Map Location: ] [Description: uncharacterized LOC103312902] [Gene Type: protein-coding]	LOC103312902; TcasGA2_TC013973
607	NC_007420.3	3601454	SNV	G	A	Homozygous	23	23	100	1	9	21	0.3	37.74	30	30	11	14		1	1	no	A/A	No	1	90.71	XP_015835221.1:c.172C>T	XP_015835221.1:p.Pro58Ser	LOC656096	656096		656096 [Gene Symbol: LOC656096] [Locus Tag: ] [Chromosome: LG5] [Map Location: ] [Description: uncharacterized LOC656096] [Gene Type: protein-coding]	LOC656096
608	NC_007420.3	3601474	SNV	A	G	Homozygous	22	23	95.65	1	9	21	0.3	38.68	30	32	10	12		1	1	no	G/G	No	1	57.82	XP_015835221.1:c.152T>C	XP_015835221.1:p.Val51Ala	LOC656096	656096		656096 [Gene Symbol: LOC656096] [Locus Tag: ] [Chromosome: LG5] [Map Location: ] [Description: uncharacterized LOC656096] [Gene Type: protein-coding]	LOC656096
609	NC_007420.3	3612667	SNV	A	G	Homozygous	20	20	100	1	10	14	0.42	36.65	24	24	10	11		1	1	no	G/G	No	1	80.09	XP_008193006.2:c.[142A>G]; XP_001809825.2:c.[560-2825T>C]	XP_008193006.2:p.Ile48Val	LOC100141875, LOC656347	100141875 , 656347		100141875 [Gene Symbol: LOC100141875] [Locus Tag: TcasGA2_TC013816] [Chromosome: LG5] [Map Location: ] [Description: cuticle protein] [Gene Type: protein-coding] || 656347 [Gene Symbol: LOC656347] [Locus Tag: TcasGA2_TC013990] [Chromosome: LG5] [Map Location: ] [Description: cuticle protein 7] [Gene Type: protein-coding]	TcasGA2_TC013816; LOC100141875 || Cuti-4; TcasGA2_TC013990; LOC656347
610	NC_007420.3	3725059	SNV	G	C	Heterozygous	12	22	54.55	1	11	4	0.27	36.67	15	27	6	7	-1.48	0.35	0.82	no	C/G	No	1	78.92	XP_008193014.1:c.711G>C	XP_008193014.1:p.Leu237Phe	LOC657332	657332		657332 [Gene Symbol: LOC657332] [Locus Tag: TcasGA2_TC013994] [Chromosome: LG5] [Map Location: ] [Description: alpha-1,3/1,6-mannosyltransferase ALG2] [Gene Type: protein-coding]	TcasGA2_TC013994; LOC657332
611	NC_007420.3	3725272	SNV	G	A	Heterozygous	12	23	52.17	1	6	6	0.5	36.33	12	23	6	7	-2.37	0.67	0.83	no	A/G	No	1	89.71	XP_008193014.1:c.924G>A	XP_008193014.1:p.Met308Ile	LOC657332	657332		657332 [Gene Symbol: LOC657332] [Locus Tag: TcasGA2_TC013994] [Chromosome: LG5] [Map Location: ] [Description: alpha-1,3/1,6-mannosyltransferase ALG2] [Gene Type: protein-coding]	TcasGA2_TC013994; LOC657332
612	NC_007420.3	3725357	SNV	C	A	Heterozygous	10	26	38.46	1	6	4	0.4	37	10	27	4	10	-0.24	0.21	1	no	A/C	No	1	64.21	XP_008193014.1:c.1009C>A	XP_008193014.1:p.Leu337Ile	LOC657332	657332		657332 [Gene Symbol: LOC657332] [Locus Tag: TcasGA2_TC013994] [Chromosome: LG5] [Map Location: ] [Description: alpha-1,3/1,6-mannosyltransferase ALG2] [Gene Type: protein-coding]	TcasGA2_TC013994; LOC657332
613	NC_007420.3	3729743	SNV	G	A	Heterozygous	9	26	34.62	1	7	4	0.36	36	11	30	5	7	-1.75	0.33	0.24	no	A/G	No	1	55.25	XP_969040.2:c.1180G>A	XP_969040.2:p.Val394Met	LOC657490	657490		657490 [Gene Symbol: LOC657490] [Locus Tag: TcasGA2_TC013995] [Chromosome: LG5] [Map Location: ] [Description: E3 ubiquitin-protein ligase parkin] [Gene Type: protein-coding]	TcasGA2_TC013995; LOC657490
614	NC_007420.3	3880872	SNV	T	G	Homozygous	24	24	100	1	16	10	0.38	38.29	26	26	10	14		1	1	no	G/G	No	1	92.13	XP_015835500.1:c.[2825A>C]; XP_008193024.1:c.[2825A>C]; XP_015835499.1:c.[2825A>C]; XP_015835502.1:c.[2753A>C]	XP_015835500.1:p.[Asn942Thr]; XP_008193024.1:p.[Asn942Thr]; XP_015835499.1:p.[Asn942Thr]; XP_015835502.1:p.[Asn918Thr]	LOC103312925	103312925		103312925 [Gene Symbol: LOC103312925] [Locus Tag: TcasGA2_TC013796] [Chromosome: LG5] [Map Location: ] [Description: DNA N6-methyl adenine demethylase] [Gene Type: protein-coding]	LOC103312925; TcasGA2_TC013796
615	NC_007420.3	4023087	SNV	G	A	Homozygous	18	20	90	0.99	11	10	0.48	36.61	21	23	9	10		0.96	1	no	A/A	No	1	18.26	XP_970660.2:c.166C>T	XP_970660.2:p.Pro56Ser	LOC659242	659242		659242 [Gene Symbol: LOC659242] [Locus Tag: TcasGA2_TC013791] [Chromosome: LG5] [Map Location: ] [Description: peroxiredoxin-6] [Gene Type: protein-coding]	LOC659242; TcasGA2_TC013791
616	NC_007420.3	4023090	SNV	A	G	Homozygous	18	20	90	1	11	10	0.48	36	21	23	9	10		0.99	1	no	G/G	No	1	23.82	XP_970660.2:c.163T>C	XP_970660.2:p.Tyr55His	LOC659242	659242		659242 [Gene Symbol: LOC659242] [Locus Tag: TcasGA2_TC013791] [Chromosome: LG5] [Map Location: ] [Description: peroxiredoxin-6] [Gene Type: protein-coding]	LOC659242; TcasGA2_TC013791
617	NC_007420.3	4030375..4030376	MNV	CG	GT	Homozygous	28	28	100	1	14	23	0.38	38.37	37	37	16	21		1	1	no	GT/GT	No	1	200	XP_970910.1:c.26_27delCGinsAC	XP_970910.1:p.Thr9Asn	LOC659517	659517		659517 [Gene Symbol: LOC659517] [Locus Tag: TcasGA2_TC013789] [Chromosome: LG5] [Map Location: ] [Description: N-terminal Xaa-Pro-Lys N-methyltransferase 1] [Gene Type: protein-coding]	LOC659517; TcasGA2_TC013789
618	NC_007420.3	4234878	SNV	G	A	Homozygous	23	23	100	1	16	9	0.36	37.65	25	25	13	16		1	1	no	A/A	No	1	90.71	XP_015835355.1:c.[1442G>A]; XP_008193050.1:c.[1442G>A]	XP_015835355.1:p.[Arg481Gln]; XP_008193050.1:p.[Arg481Gln]	LOC103312928	103312928		103312928 [Gene Symbol: LOC103312928] [Locus Tag: TcasGA2_TC014016] [Chromosome: LG5] [Map Location: ] [Description: antigen KI-67] [Gene Type: protein-coding]	LOC103312928; TcasGA2_TC014016
619	NC_007420.3	4246790	SNV	T	C	Heterozygous	9	23	39.13	1	3	7	0.3	39.44	10	27	5	6	1.54	0.23	0.76	no	C/T	No	1	64.63	XP_008193052.1:c.842T>C	XP_008193052.1:p.Val281Ala	LOC660537	660537		660537 [Gene Symbol: LOC660537] [Locus Tag: ] [Chromosome: LG5] [Map Location: ] [Description: protein 60A-like] [Gene Type: protein-coding]	LOC660537
620	NC_007420.3	4247022	SNV	C	A	Heterozygous	7	22	31.82	1	4	3	0.43	39.29	7	23	4	6	-0.49	0.84	0.91	no	A/C	No	1	37.06	XP_008193052.1:c.1021C>A	XP_008193052.1:p.Leu341Ile	LOC660537	660537		660537 [Gene Symbol: LOC660537] [Locus Tag: ] [Chromosome: LG5] [Map Location: ] [Description: protein 60A-like] [Gene Type: protein-coding]	LOC660537
621	NC_007420.3	4247061	SNV	T	G	Heterozygous	6	22	27.27	1	6	1	0.14	38.5	7	28	4	5	1.25	0.78	0.58	no	G/T	No	1	28.47	XP_008193052.1:c.1060T>G	XP_008193052.1:p.Phe354Val	LOC660537	660537		660537 [Gene Symbol: LOC660537] [Locus Tag: ] [Chromosome: LG5] [Map Location: ] [Description: protein 60A-like] [Gene Type: protein-coding]	LOC660537
622	NC_007420.3	4426802	SNV	C	T	Homozygous	21	21	100	1	17	6	0.26	38.38	23	23	13	18		1	1	no	T/T	No	1	84.7	XP_008193067.1:c.110C>T	XP_008193067.1:p.Thr37Ile	LOC103312930	103312930		103312930 [Gene Symbol: LOC103312930] [Locus Tag: TcasGA2_TC014025] [Chromosome: LG5] [Map Location: ] [Description: toll-like receptor 3] [Gene Type: protein-coding]	LOC103312930; TcasGA2_TC014025
623	NC_007420.3	4461410	SNV	T	A	Homozygous	21	21	100	1	14	13	0.48	37.14	27	27	15	14		1	1	no	A/A	No	1	84.7	XP_972577.1:c.785A>T	XP_972577.1:p.Lys262Met	LOC661320	661320		661320 [Gene Symbol: LOC661320] [Locus Tag: TcasGA2_TC013773] [Chromosome: LG5] [Map Location: ] [Description: cytochrome P450-like protein] [Gene Type: protein-coding]	TcasGA2_TC013773; LOC661320
624	NC_007420.3	4481171	SNV	C	G	Homozygous	27	27	100	1	23	9	0.28	36.52	32	32	23	20		1	1	no	G/G	No	1	101.14	XP_015835422.1:c.[106G>C]; XP_015835421.1:c.[106G>C]	XP_015835422.1:p.[Glu36Gln]; XP_015835421.1:p.[Glu36Gln]	LOC103312914	103312914		103312914 [Gene Symbol: LOC103312914] [Locus Tag: TcasGA2_TC013771] [Chromosome: LG5] [Map Location: ] [Description: uncharacterized LOC103312914] [Gene Type: protein-coding]	Or334; LOC103312914; TcasGA2_TC013771
625	NC_007420.3	4481179	SNV	A	G	Homozygous	30	30	100	1	22	12	0.35	36.63	34	34	25	22		1	1	no	G/G	No	1	110.18	XP_015835421.1:c.[98T>C]; XP_015835422.1:c.[98T>C]	XP_015835421.1:p.[Ile33Thr]; XP_015835422.1:p.[Ile33Thr]	LOC103312914	103312914		103312914 [Gene Symbol: LOC103312914] [Locus Tag: TcasGA2_TC013771] [Chromosome: LG5] [Map Location: ] [Description: uncharacterized LOC103312914] [Gene Type: protein-coding]	Or334; LOC103312914; TcasGA2_TC013771
626	NC_007420.3	4481249	SNV	C	T	Heterozygous	8	29	27.59	1	4	4	0.5	40	8	32	6	8	-0.02	0.84	0.83	no	C/T	No	1	33.82	XP_015835422.1:c.[28G>A]; XP_015835421.1:c.[28G>A]	XP_015835422.1:p.[Asp10Asn]; XP_015835421.1:p.[Asp10Asn]	LOC103312914	103312914		103312914 [Gene Symbol: LOC103312914] [Locus Tag: TcasGA2_TC013771] [Chromosome: LG5] [Map Location: ] [Description: uncharacterized LOC103312914] [Gene Type: protein-coding]	Or334; LOC103312914; TcasGA2_TC013771
627	NC_007420.3	4483865	SNV	C	T	Homozygous	23	23	100	1	12	12	0.5	38.35	24	24	14	16		1	1	no	T/T	No	1	90.72	XP_972668.2:c.422G>A	XP_972668.2:p.Arg141Lys	LOC103312914, LOC661418	103312914 , 661418		103312914 [Gene Symbol: LOC103312914] [Locus Tag: TcasGA2_TC013771] [Chromosome: LG5] [Map Location: ] [Description: uncharacterized LOC103312914] [Gene Type: protein-coding] || 661418 [Gene Symbol: LOC661418] [Locus Tag: TcasGA2_TC013770] [Chromosome: LG5] [Map Location: ] [Description: beta-1,3-galactosyltransferase brn] [Gene Type: protein-coding]	Or334; LOC103312914; TcasGA2_TC013771 || LOC661418; TcasGA2_TC013770
628	NC_007420.3	4483880	SNV	G	A	Homozygous	20	20	100	1	10	11	0.48	38.75	21	21	12	13		1	1	no	A/A	No	1	81.69	XP_972668.2:c.407C>T	XP_972668.2:p.Ser136Leu	LOC103312914, LOC661418	103312914 , 661418		103312914 [Gene Symbol: LOC103312914] [Locus Tag: TcasGA2_TC013771] [Chromosome: LG5] [Map Location: ] [Description: uncharacterized LOC103312914] [Gene Type: protein-coding] || 661418 [Gene Symbol: LOC661418] [Locus Tag: TcasGA2_TC013770] [Chromosome: LG5] [Map Location: ] [Description: beta-1,3-galactosyltransferase brn] [Gene Type: protein-coding]	Or334; LOC103312914; TcasGA2_TC013771 || LOC661418; TcasGA2_TC013770
629	NC_007420.3	4618125	SNV	A	G	Homozygous	22	22	100	1	4	18	0.18	37.41	22	22	11	14		1	1	no	G/G	No	1	86.11	XP_973105.1:c.310A>G	XP_973105.1:p.Ile104Val	LOC661880	661880		661880 [Gene Symbol: LOC661880] [Locus Tag: TcasGA2_TC014037] [Chromosome: LG5] [Map Location: ] [Description: signal transducing adapter molecule 2] [Gene Type: protein-coding]	LOC661880; TcasGA2_TC014037
630	NC_007420.3	4678406	SNV	C	T	Homozygous	21	21	100	1	11	13	0.46	36.71	24	24	10	14		1	1	no	T/T	No	1	84.71	XP_973328.1:c.[1042C>T]; XP_015835420.1:c.[676C>T]; XP_015835418.1:c.[1054C>T]; XP_015835419.1:c.[1048C>T]; XP_008193094.1:c.[1036C>T]	XP_973328.1:p.[Leu348Phe]; XP_015835420.1:p.[Leu226Phe]; XP_015835418.1:p.[Leu352Phe]; XP_015835419.1:p.[Leu350Phe]; XP_008193094.1:p.[Leu346Phe]	LOC662118	662118		662118 [Gene Symbol: LOC662118] [Locus Tag: TcasGA2_TC014040] [Chromosome: LG5] [Map Location: ] [Description: calcium uptake protein 1 homolog, mitochondrial] [Gene Type: protein-coding]	TcasGA2_TC014040; LOC662118
631	NC_007420.3	4951429	SNV	C	T	Homozygous	24	24	100	1	8	22	0.27	36.17	30	30	11	12		1	1	no	T/T	No	1	93.74	XP_008193134.1:c.6085G>A	XP_008193134.1:p.Gly2029Ser	LOC662874	662874		662874 [Gene Symbol: LOC662874] [Locus Tag: TcasGA2_TC013742] [Chromosome: LG5] [Map Location: ] [Description: myosin 7B] [Gene Type: protein-coding]	Myo7B; LOC662874; TcasGA2_TC013742
632	NC_007420.3	4964139	SNV	G	C	Homozygous	21	21	100	1	11	10	0.48	37.52	21	21	13	16		1	1	no	C/C	No	1	83.13	XP_008193135.1:c.2152C>G	XP_008193135.1:p.His718Asp	LOC662902	662902		662902 [Gene Symbol: LOC662902] [Locus Tag: TcasGA2_TC013741] [Chromosome: LG5] [Map Location: ] [Description: uncharacterized LOC662902] [Gene Type: protein-coding]	LOC662902; TcasGA2_TC013741
633	NC_007420.3	5093370	SNV	T	C	Heterozygous	5	20	25	0.99	1	4	0.2	39.2	5	22	3	3	1.48	0.18	0.48	no	C/T	No	1	21.96	XP_008193001.1:c.677A>G	XP_008193001.1:p.Lys226Arg	LOC103312916	103312916		103312916 [Gene Symbol: LOC103312916] [Locus Tag: ] [Chromosome: LG5] [Map Location: ] [Description: adhesion G-protein coupled receptor G2-like] [Gene Type: protein-coding]	LOC103312916
634	NC_007420.3	5093374	SNV	C	T	Heterozygous	5	20	25	0.99	1	4	0.2	40	5	22	3	3	2.18	0.18	0.48	no	C/T	No	1	20.75	XP_008193001.1:c.673G>A	XP_008193001.1:p.Ala225Thr	LOC103312916	103312916		103312916 [Gene Symbol: LOC103312916] [Locus Tag: ] [Chromosome: LG5] [Map Location: ] [Description: adhesion G-protein coupled receptor G2-like] [Gene Type: protein-coding]	LOC103312916
635	NC_007420.3	5181857..5181859	Deletion	CAA	-	Heterozygous	9	22	40.91	1	6	3	0.33	35.11	9	24	4	7		0.48	0.71	no	complex	No	1	200	XP_008193147.1:c.871_873delCAA	XP_008193147.1:p.Gln294del	LOC663351	663351		663351 [Gene Symbol: LOC663351] [Locus Tag: TcasGA2_TC014065] [Chromosome: LG5] [Map Location: ] [Description: transcription factor Sox-3] [Gene Type: protein-coding]	LOC663351; SoxN; TcasGA2_TC014065; SoxNeuro
636	NC_007420.3	5381092	SNV	T	A	Homozygous	21	22	95.45	1	7	15	0.32	38.67	22	23	11	13		1	1	no	A/A	No	1	58.42	XP_966549.1:c.1932T>A	XP_966549.1:p.Asp644Glu	LOC654987	654987		654987 [Gene Symbol: LOC654987] [Locus Tag: TcasGA2_TC014075] [Chromosome: LG5] [Map Location: ] [Description: DNA-directed RNA polymerase III subunit RPC2] [Gene Type: protein-coding]	TcasGA2_TC014075; LOC654987
637	NC_007420.3	5429198..5429199	MNV	AC	GT	Heterozygous	13	23	56.52	1	7	9	0.44	37.81	16	26	11	14	1.94	0.85	1	no	complex	No	1	200	XP_015835278.1:c.[5272_5273delGTinsAC]; XP_015835280.1:c.[1437-4571_1437-4570delGTinsAC]; XP_008193174.2:c.[1556-4571_1556-4570delGTinsAC]	XP_015835278.1:p.Val1758Thr	LOC655359, LOC107397896	655359 , 107397896		655359 [Gene Symbol: LOC655359] [Locus Tag: TcasGA2_TC013716] [Chromosome: LG5] [Map Location: ] [Description: FERM, RhoGEF and pleckstrin domain-containing protein 1] [Gene Type: protein-coding] || 107397896 [Gene Symbol: LOC107397896] [Locus Tag: ] [Chromosome: LG5] [Map Location: ] [Description: titin-like] [Gene Type: protein-coding]	TcasGA2_TC013716; LOC655359 || LOC107397896
638	NC_007420.3	5431224	SNV	G	C	Homozygous	21	21	100	1	6	17	0.26	37.05	23	23	11	12		1	1	no	C/C	No	1	83.12	XP_008193174.2:c.[1555+3276C>G]; XP_015835280.1:c.[1436+3276C>G]; XP_015835278.1:c.[3247C>G]	XP_015835278.1:p.Leu1083Val	LOC655359, LOC107397896	655359 , 107397896		655359 [Gene Symbol: LOC655359] [Locus Tag: TcasGA2_TC013716] [Chromosome: LG5] [Map Location: ] [Description: FERM, RhoGEF and pleckstrin domain-containing protein 1] [Gene Type: protein-coding] || 107397896 [Gene Symbol: LOC107397896] [Locus Tag: ] [Chromosome: LG5] [Map Location: ] [Description: titin-like] [Gene Type: protein-coding]	TcasGA2_TC013716; LOC655359 || LOC107397896
639	NC_007420.3	5463885	SNV	A	T	Homozygous	21	21	100	1	10	12	0.45	37.29	22	22	16	18		1	1	no	T/T	No	1	84.7	XP_967422.1:c.2032T>A	XP_967422.1:p.Ser678Thr	LOC655767	655767		655767 [Gene Symbol: LOC655767] [Locus Tag: TcasGA2_TC013713] [Chromosome: LG5] [Map Location: ] [Description: DNA replication licensing factor Mcm7] [Gene Type: protein-coding]	LOC655767; TcasGA2_TC013713
640	NC_007420.3	5463970	SNV	T	A	Homozygous	21	21	100	1	14	8	0.36	38.1	22	22	14	15		1	1	no	A/A	No	1	84.7	XP_967422.1:c.1947A>T	XP_967422.1:p.Glu649Asp	LOC655767	655767		655767 [Gene Symbol: LOC655767] [Locus Tag: TcasGA2_TC013713] [Chromosome: LG5] [Map Location: ] [Description: DNA replication licensing factor Mcm7] [Gene Type: protein-coding]	LOC655767; TcasGA2_TC013713
641	NC_007420.3	5564233	SNV	A	C	Heterozygous	16	23	69.57	1	15	1	0.06	35.94	16	24	8	12	-1.67	0.72	0.72	no	A/C	No	1	34.24	XP_015835528.1:c.[655A>C]; XP_008193184.1:c.[949A>C]	XP_015835528.1:p.[Ile219Leu]; XP_008193184.1:p.[Ile317Leu]	LOC657102	657102		657102 [Gene Symbol: LOC657102] [Locus Tag: TcasGA2_TC014091] [Chromosome: LG5] [Map Location: ] [Description: probable multidrug resistance-associated protein lethal(2)03659] [Gene Type: protein-coding]	LOC657102; TcasGA2_TC014091
642	NC_007420.3	5575327	SNV	G	C	Homozygous	20	20	100	1	16	12	0.43	36.9	28	28	12	13		1	1	no	C/C	No	1	80.11	XP_015835557.1:c.[3873G>C]; XP_968748.1:c.[3873G>C]	XP_015835557.1:p.[Glu1291Asp]; XP_968748.1:p.[Glu1291Asp]	LOC657184	657184		657184 [Gene Symbol: LOC657184] [Locus Tag: TcasGA2_TC014092] [Chromosome: LG5] [Map Location: ] [Description: probable multidrug resistance-associated protein lethal(2)03659] [Gene Type: protein-coding]	TcasGA2_TC014092; LOC657184
643	NC_007420.3	5665685	SNV	A	G	Homozygous	20	20	100	1	9	15	0.38	38.65	24	24	10	11		1	1	no	G/G	No	1	80.09	XP_008193225.1:c.5282A>G	XP_008193225.1:p.Lys1761Arg	LOC100142258	100142258		100142258 [Gene Symbol: LOC100142258] [Locus Tag: TcasGA2_TC014099] [Chromosome: LG5] [Map Location: ] [Description: uncharacterized LOC100142258] [Gene Type: protein-coding]	TcasGA2_TC014099; LOC100142258
644	NC_007420.3	5665857	SNV	A	T	Heterozygous	15	20	75	0.99	10	7	0.41	37.07	17	22	9	14	-0.44	0.95	1	no	A/T	No	1	20.66	XP_008193225.1:c.5454A>T	XP_008193225.1:p.Lys1818Asn	LOC100142258	100142258		100142258 [Gene Symbol: LOC100142258] [Locus Tag: TcasGA2_TC014099] [Chromosome: LG5] [Map Location: ] [Description: uncharacterized LOC100142258] [Gene Type: protein-coding]	TcasGA2_TC014099; LOC100142258
645	NC_007420.3	5746110	SNV	C	A	Heterozygous	7	21	33.33	1	3	4	0.43	35.71	7	21	5	6	-2.09	0.16	0.9	no	A/C	No	1	39.79	XP_970378.1:c.140C>A	XP_970378.1:p.Thr47Asn	LOC658938	658938		658938 [Gene Symbol: LOC658938] [Locus Tag: TcasGA2_TC014110] [Chromosome: LG5] [Map Location: ] [Description: ras-related protein Rab-18] [Gene Type: protein-coding]	TcasGA2_TC014110; LOC658938
646	NC_007420.3	5746118	SNV	C	A	Heterozygous	7	20	35	1	3	5	0.38	39	8	21	5	6	0.95	0.1	0.89	no	A/C	No	1	42.63	XP_970378.1:c.148C>A	XP_970378.1:p.Leu50Ile	LOC658938	658938		658938 [Gene Symbol: LOC658938] [Locus Tag: TcasGA2_TC014110] [Chromosome: LG5] [Map Location: ] [Description: ras-related protein Rab-18] [Gene Type: protein-coding]	TcasGA2_TC014110; LOC658938
647	NC_007420.3	5807229	SNV	A	G	Heterozygous	9	21	42.86	1	5	7	0.42	39.33	12	24	8	7	1.49	0.38	0.98	no	A/G	No	1	70.03	XP_008193253.1:c.[959A>G]; XP_008193254.1:c.[54-11717T>C]; XP_015835510.1:c.[54-11717T>C]	XP_008193253.1:p.Glu320Gly	LOC659317, LOC103312989	659317 , 103312989		659317 [Gene Symbol: LOC659317] [Locus Tag: TcasGA2_TC013697] [Chromosome: LG5] [Map Location: ] [Description: uncharacterized LOC659317] [Gene Type: protein-coding] || 103312989 [Gene Symbol: LOC103312989] [Locus Tag: TcasGA2_TC014116] [Chromosome: LG5] [Map Location: ] [Description: carboxypeptidase N subunit 2] [Gene Type: protein-coding]	LOC659317; TcasGA2_TC013697 || LOC103312989; TcasGA2_TC014116
648	NC_007420.3	5807384	SNV	C	G	Heterozygous	11	21	52.38	1	2	9	0.18	37.64	11	23	5	7	-0.07	0.79	0.75	no	C/G	No	1	81.43	XP_008193254.1:c.[54-11872G>C]; XP_015835510.1:c.[54-11872G>C]; XP_008193253.1:c.[1114C>G]	XP_008193253.1:p.Gln372Glu	LOC659317, LOC103312989	659317 , 103312989		659317 [Gene Symbol: LOC659317] [Locus Tag: TcasGA2_TC013697] [Chromosome: LG5] [Map Location: ] [Description: uncharacterized LOC659317] [Gene Type: protein-coding] || 103312989 [Gene Symbol: LOC103312989] [Locus Tag: TcasGA2_TC014116] [Chromosome: LG5] [Map Location: ] [Description: carboxypeptidase N subunit 2] [Gene Type: protein-coding]	LOC659317; TcasGA2_TC013697 || LOC103312989; TcasGA2_TC014116
649	NC_007420.3	6044873	SNV	A	G	Heterozygous	9	23	39.13	1	4	5	0.44	37.11	9	24	3	5	-0.6	0.59	0.99	no	A/G	No	1	64.36	XP_971397.2:c.626A>G	XP_971397.2:p.Asn209Ser	LOC660041	660041		660041 [Gene Symbol: LOC660041] [Locus Tag: TcasGA2_TC014124] [Chromosome: LG5] [Map Location: ] [Description: Krueppel-like factor 11] [Gene Type: protein-coding]	LOC660041; TcasGA2_TC014124
650	NC_007420.3	6057769	SNV	T	G	Heterozygous	14	24	58.33	1	12	5	0.29	36.57	17	27	5	11	-0.23	0.73	0.84	no	G/T	No	1	69.95	XP_008193260.1:c.[692A>C]; XP_008193261.1:c.[692A>C]; XP_015835498.1:c.[692A>C]	XP_008193260.1:p.[Glu231Ala]; XP_008193261.1:p.[Glu231Ala]; XP_015835498.1:p.[Glu231Ala]	LOC660108	660108		660108 [Gene Symbol: LOC660108] [Locus Tag: TcasGA2_TC013686] [Chromosome: LG5] [Map Location: ] [Description: coiled-coil and C2 domain-containing protein 1-like] [Gene Type: protein-coding]	TcasGA2_TC013686; LOC660108
651	NC_007420.3	6057785	SNV	A	G	Homozygous	26	26	100	1	23	5	0.18	38.69	28	28	8	19		1	1	no	G/G	No	1	98.15	XP_008193261.1:c.[676T>C]; XP_008193260.1:c.[676T>C]; XP_015835498.1:c.[676T>C]	XP_008193261.1:p.[Ser226Pro]; XP_008193260.1:p.[Ser226Pro]; XP_015835498.1:p.[Ser226Pro]	LOC660108	660108		660108 [Gene Symbol: LOC660108] [Locus Tag: TcasGA2_TC013686] [Chromosome: LG5] [Map Location: ] [Description: coiled-coil and C2 domain-containing protein 1-like] [Gene Type: protein-coding]	TcasGA2_TC013686; LOC660108
652	NC_007420.3	6057830	SNV	A	G	Heterozygous	5	24	20.83	0.92	4	1	0.2	34.8	5	25	3	5	-0.36	0.18	0.44	no	A/G	No	1	10.99	XP_008193261.1:c.[631T>C]; XP_008193260.1:c.[631T>C]; XP_015835498.1:c.[631T>C]	XP_008193261.1:p.[Ser211Pro]; XP_008193260.1:p.[Ser211Pro]; XP_015835498.1:p.[Ser211Pro]	LOC660108	660108		660108 [Gene Symbol: LOC660108] [Locus Tag: TcasGA2_TC013686] [Chromosome: LG5] [Map Location: ] [Description: coiled-coil and C2 domain-containing protein 1-like] [Gene Type: protein-coding]	TcasGA2_TC013686; LOC660108
653	NC_007420.3	6057839	SNV	T	A	Homozygous	18	20	90	0.99	7	12	0.37	34.56	19	21	6	11		1	1	no	A/A	No	1	20.25	XP_015835498.1:c.[622A>T]; XP_008193261.1:c.[622A>T]; XP_008193260.1:c.[622A>T]	XP_015835498.1:p.[Thr208Ser]; XP_008193261.1:p.[Thr208Ser]; XP_008193260.1:p.[Thr208Ser]	LOC660108	660108		660108 [Gene Symbol: LOC660108] [Locus Tag: TcasGA2_TC013686] [Chromosome: LG5] [Map Location: ] [Description: coiled-coil and C2 domain-containing protein 1-like] [Gene Type: protein-coding]	TcasGA2_TC013686; LOC660108
654	NC_007420.3	6226571	SNV	T	C	Heterozygous	12	21	57.14	1	12	1	0.08	38.19	13	25	7	8		0.69	0.87	no	complex	No	1	200	XP_015835373.1:c.[8315T>C]; XP_015835398.1:c.[7325T>C]; XP_015835377.1:c.[8438T>C]; XP_015835380.1:c.[8282T>C]; XP_015835391.1:c.[7916T>C]; XP_015835395.1:c.[7580T>C]; XP_015835396.1:c.[7556T>C]; XP_015835383.1:c.[8192T>C]; XP_015835385.1:c.[8162T>C]; XP_015835387.1:c.[8078T>C]; XP_015835397.1:c.[7469T>C]; XP_015835374.1:c.[8312T>C]; XP_015835378.1:c.[8297T>C]; XP_015835371.1:c.[8438T>C]; XP_0158…	XP_015835373.1:p.[Leu2772Pro]; XP_015835398.1:p.[Leu2442Pro]; XP_015835377.1:p.[Leu2813Pro]; XP_015835380.1:p.[Leu2761Pro]; XP_015835391.1:p.[Leu2639Pro]; XP_015835395.1:p.[Leu2527Pro]; XP_015835396.1:p.[Leu2519Pro]; XP_015835383.1:p.[Leu2731Pro]; XP_015835385.1:p.[Leu2721Pro]; XP_015835387.1:p.[Leu2693Pro]; XP_015835397.1:p.[Leu2490Pro]; XP_015835374.1:p.[Leu2771Pro]; XP_015835378.1:p.[Leu2766Pr…	LOC660769	660769		660769 [Gene Symbol: LOC660769] [Locus Tag: TcasGA2_TC030735] [Chromosome: LG5] [Map Location: ] [Description: basement membrane-specific heparan sulfate proteoglycan core protein] [Gene Type: protein-coding]	LOC660769; TcasGA2_TC030735
655	NC_007420.3	6226571..6226572	MNV	TG	CC	Heterozygous	9	21	42.86	1	9	3	0.25	38.96	12	25	6	7		0.95	0.92	no	complex	No	1	200	XP_015835398.1:c.[7325_7326delTGinsCC]; XP_015835393.1:c.[7700_7701delTGinsCC]; XP_015835385.1:c.[8162_8163delTGinsCC]; XP_015835377.1:c.[8438_8439delTGinsCC]; XP_015835381.1:c.[8228_8229delTGinsCC]; XP_015835383.1:c.[8192_8193delTGinsCC]; XP_015835378.1:c.[8297_8298delTGinsCC]; XP_015835397.1:c.[7469_7470delTGinsCC]; XP_015835379.1:c.[8294_8295delTGinsCC]; XP_015835369.1:c.[8438_8439delTGinsCC];…	XP_015835398.1:p.[Leu2442Pro]; XP_015835393.1:p.[Leu2567Pro]; XP_015835385.1:p.[Leu2721Pro]; XP_015835377.1:p.[Leu2813Pro]; XP_015835381.1:p.[Leu2743Pro]; XP_015835383.1:p.[Leu2731Pro]; XP_015835378.1:p.[Leu2766Pro]; XP_015835397.1:p.[Leu2490Pro]; XP_015835379.1:p.[Leu2765Pro]; XP_015835369.1:p.[Leu2813Pro]; XP_015835387.1:p.[Leu2693Pro]; XP_015835399.1:p.[Leu2233Pro]; XP_015835386.1:p.[Leu2713Pr…	LOC660769	660769		660769 [Gene Symbol: LOC660769] [Locus Tag: TcasGA2_TC030735] [Chromosome: LG5] [Map Location: ] [Description: basement membrane-specific heparan sulfate proteoglycan core protein] [Gene Type: protein-coding]	LOC660769; TcasGA2_TC030735
656	NC_007420.3	6614210	SNV	G	A	Homozygous	18	21	85.71	0.82	9	10	0.47	38.33	19	22	8	9		0.98	1	no	A/A	No	1	7.42	XP_008193316.1:c.340G>A	XP_008193316.1:p.Asp114Asn	LOC103313000	103313000		103313000 [Gene Symbol: LOC103313000] [Locus Tag: TcasGA2_TC014145] [Chromosome: LG5] [Map Location: ] [Description: uncharacterized LOC103313000] [Gene Type: protein-coding]	LOC103313000; TcasGA2_TC014145
657	NC_007420.3	6800033	SNV	G	A	Heterozygous	15	21	71.43	1	3	12	0.2	38.67	15	22	10	10	-0.35	0.78	0.72	no	A/G	No	1	31.75	XP_015835509.1:c.[13G>A]; XP_015835508.1:c.[13G>A]; XP_973694.1:c.[13G>A]; XP_015835506.1:c.[13G>A]	XP_015835509.1:p.[Asp5Asn]; XP_015835508.1:p.[Asp5Asn]; XP_973694.1:p.[Asp5Asn]; XP_015835506.1:p.[Asp5Asn]	LOC662510	662510		662510 [Gene Symbol: LOC662510] [Locus Tag: TcasGA2_TC014156] [Chromosome: LG5] [Map Location: ] [Description: organic cation transporter protein] [Gene Type: protein-coding]	TcasGA2_TC014156; LOC662510
658	NC_007420.3	6957284^6957285	Insertion	-	T	Homozygous	21	21	100	1	8	13	0.38	38.57	21	21	10	12		1	1	no	T/T	No	1	84.7	XP_015835242.1:c.[1357_1358insA]; XP_015835243.1:c.[1249_1250insA]	XP_015835242.1:p.[Thr453fs]; XP_015835243.1:p.[Thr417fs]	LOC103313003	103313003		103313003 [Gene Symbol: LOC103313003] [Locus Tag: TcasGA2_TC013651] [Chromosome: LG5] [Map Location: ] [Description: melanoma-associated antigen E1] [Gene Type: protein-coding]	LOC103313003; TcasGA2_TC013651
659	NC_007420.3	6957289^6957290	Insertion	-	A	Homozygous	19	20	95	1	6	13	0.32	38.47	19	20	9	11		1	1	no	A/A	No	1	50.16	XP_015835243.1:c.[1244_1245insT]; XP_015835242.1:c.[1352_1353insT]	XP_015835243.1:p.[Tyr416fs]; XP_015835242.1:p.[Tyr452fs]	LOC103313003	103313003		103313003 [Gene Symbol: LOC103313003] [Locus Tag: TcasGA2_TC013651] [Chromosome: LG5] [Map Location: ] [Description: melanoma-associated antigen E1] [Gene Type: protein-coding]	LOC103313003; TcasGA2_TC013651
660	NC_007420.3	7111069	SNV	T	G	Homozygous	22	22	100	1	11	11	0.5	37.18	22	22	15	17		1	1	no	G/G	No	1	86.11	XP_008193190.1:c.16A>C	XP_008193190.1:p.Ile6Leu	LOC103312976	103312976		103312976 [Gene Symbol: LOC103312976] [Locus Tag: TcasGA2_TC013644] [Chromosome: LG5] [Map Location: ] [Description: uncharacterized LOC103312976] [Gene Type: protein-coding]	LOC103312976; TcasGA2_TC013644
661	NC_007420.3	7111078	SNV	T	C	Homozygous	22	22	100	1	11	11	0.5	37.95	22	22	15	17		1	1	no	C/C	No	1	86.13	XP_008193190.1:c.7A>G	XP_008193190.1:p.Ile3Val	LOC103312976	103312976		103312976 [Gene Symbol: LOC103312976] [Locus Tag: TcasGA2_TC013644] [Chromosome: LG5] [Map Location: ] [Description: uncharacterized LOC103312976] [Gene Type: protein-coding]	LOC103312976; TcasGA2_TC013644
662	NC_007420.3	7143652	SNV	T	C	Homozygous	21	21	100	1	15	9	0.38	38.05	24	24	15	13		1	1	no	C/C	No	1	83.13	XP_967786.3:c.1003A>G	XP_967786.3:p.Asn335Asp	LOC656144	656144		656144 [Gene Symbol: LOC656144] [Locus Tag: ] [Chromosome: LG5] [Map Location: ] [Description: serpin peptidase inhibitor 6] [Gene Type: protein-coding]	LOC656144; Serpin6
663	NC_007420.3	7305466	SNV	A	G	Homozygous	28	29	96.55	1	27	9	0.25	36.29	36	38	9	22		0.99	1	no	G/G	No	1	79.68	XP_008200429.1:c.[1360T>C]; XP_008200430.1:c.[1360T>C]; XP_015835265.1:c.[1240T>C]; XP_015835266.1:c.[985T>C]; XP_015835263.1:c.[1360T>C]	XP_008200429.1:p.[Ser454Pro]; XP_008200430.1:p.[Ser454Pro]; XP_015835265.1:p.[Ser414Pro]; XP_015835266.1:p.[Ser329Pro]; XP_015835263.1:p.[Ser454Pro]	LOC658981	658981		658981 [Gene Symbol: LOC658981] [Locus Tag: TcasGA2_TC010434] [Chromosome: LG5] [Map Location: ] [Description: probable multidrug resistance-associated protein lethal(2)03659] [Gene Type: protein-coding]	TcasGA2_TC010434; LOC658981
664	NC_007420.3	7308909	SNV	T	C	Homozygous	22	22	100	1	9	16	0.36	36.32	25	25	9	11		1	1	no	C/C	No	1	86.13	XP_015835265.1:c.[268A>G]; XP_008200430.1:c.[268A>G]; XP_015835263.1:c.[268A>G]; XP_008200429.1:c.[268A>G]	XP_015835265.1:p.[Ser90Gly]; XP_008200430.1:p.[Ser90Gly]; XP_015835263.1:p.[Ser90Gly]; XP_008200429.1:p.[Ser90Gly]	LOC658981	658981		658981 [Gene Symbol: LOC658981] [Locus Tag: TcasGA2_TC010434] [Chromosome: LG5] [Map Location: ] [Description: probable multidrug resistance-associated protein lethal(2)03659] [Gene Type: protein-coding]	TcasGA2_TC010434; LOC658981
665	NC_007420.3	7323325	SNV	G	T	Homozygous	20	20	100	1	9	11	0.45	36.4	20	20	10	11		1	1	no	T/T	No	1	81.7	XP_008200435.1:c.3845C>A	XP_008200435.1:p.Ala1282Asp	LOC659355	659355		659355 [Gene Symbol: LOC659355] [Locus Tag: TcasGA2_TC010431] [Chromosome: LG5] [Map Location: ] [Description: maestro heat-like repeat-containing protein family member 1] [Gene Type: protein-coding]	TcasGA2_TC010431; LOC659355
666	NC_007420.3	7328496	SNV	A	G	Homozygous	20	20	100	1	13	12	0.48	34.55	25	25	15	16		1	1	no	G/G	No	1	80.08	XP_970830.2:c.835A>G	XP_970830.2:p.Thr279Ala	LOC659429	659429		659429 [Gene Symbol: LOC659429] [Locus Tag: TcasGA2_TC010440] [Chromosome: LG5] [Map Location: ] [Description: ubiquilin-1] [Gene Type: protein-coding]	TcasGA2_TC010440; LOC659429
667	NC_007420.3	7485028	SNV	T	C	Homozygous	22	23	95.65	1	15	9	0.38	37.36	24	25	12	14		1	1	no	C/C	No	1	61.21	XP_008200466.1:c.[863T>C]; XP_972506.1:c.[863T>C]	XP_008200466.1:p.[Met288Thr]; XP_972506.1:p.[Met288Thr]	LOC661238	661238		661238 [Gene Symbol: LOC661238] [Locus Tag: TcasGA2_TC010453] [Chromosome: LG5] [Map Location: ] [Description: PHD finger protein 20] [Gene Type: protein-coding]	LOC661238; TcasGA2_TC010453
668	NC_007420.3	7488595	SNV	T	C	Heterozygous	6	20	30	1	2	4	0.33	40.5	6	21	2	3	2.8	0.12	0.82	no	C/T	No	1	34.68	XP_972559.1:c.496A>G	XP_972559.1:p.Ile166Val	LOC661296	661296		661296 [Gene Symbol: LOC661296] [Locus Tag: TcasGA2_TC010412] [Chromosome: LG5] [Map Location: ] [Description: uncharacterized LOC661296] [Gene Type: protein-coding]	TcasGA2_TC010412; LOC661296
669	NC_007420.3	7600354	SNV	T	G	Homozygous	21	21	100	1	10	11	0.48	37.76	21	21	14	17		1	1	no	G/G	No	1	83.1	XP_008200485.1:c.220T>G	XP_008200485.1:p.Ser74Ala	LOC103314938	103314938		103314938 [Gene Symbol: LOC103314938] [Locus Tag: TcasGA2_TC033102] [Chromosome: LG5] [Map Location: ] [Description: nuclear receptor subfamily 2 group E member 1] [Gene Type: protein-coding]	LOC103314938; TcasGA2_TC033102
670	NC_007420.3	7856085	SNV	G	A	Homozygous	24	24	100	1	14	10	0.42	38	24	24	12	20		1	1	no	A/A	No	1	93.72	XP_015835345.1:c.[217G>A]; XP_008200508.1:c.[217G>A]	XP_015835345.1:p.[Asp73Asn]; XP_008200508.1:p.[Asp73Asn]	LOC662427	662427		662427 [Gene Symbol: LOC662427] [Locus Tag: TcasGA2_TC010468] [Chromosome: LG5] [Map Location: ] [Description: fibronectin type-III domain-containing protein 3A] [Gene Type: protein-coding]	LOC662427; TcasGA2_TC010468
671	NC_007420.3	7990715	SNV	C	T	Homozygous	31	31	100	1	24	9	0.27	37.39	33	33	11	24		1	1	no	T/T	No	1	114.8	XP_008193619.1:c.[776C>T]; XP_008193620.1:c.[431C>T]	XP_008193619.1:p.[Ser259Leu]; XP_008193620.1:p.[Ser144Leu]	LOC103313081	103313081		103313081 [Gene Symbol: LOC103313081] [Locus Tag: TcasGA2_TC014252] [Chromosome: LG5] [Map Location: ] [Description: tetratricopeptide repeat protein 25] [Gene Type: protein-coding]	LOC103313081; TcasGA2_TC014252
672	NC_007420.3	8309917	SNV	T	A	Homozygous	21	21	100	1	12	13	0.48	39	25	25	10	11		1	1	no	A/A	No	1	84.69	XP_008193661.1:c.1131A>T	XP_008193661.1:p.Glu377Asp	LOC103313092	103313092		103313092 [Gene Symbol: LOC103313092] [Locus Tag: TcasGA2_TC013535] [Chromosome: LG5] [Map Location: ] [Description: uncharacterized LOC103313092] [Gene Type: protein-coding]	TcasGA2_TC013535; LOC103313092
673	NC_007420.3	8507003	SNV	C	A	Heterozygous	10	21	47.62	1	7	4	0.36	39.5	11	23	6	6	0.95	0.85	0.93	no	A/C	No	1	78.02	XP_972170.1:c.1117C>A	XP_972170.1:p.Pro373Thr	LOC660878	660878		660878 [Gene Symbol: LOC660878] [Locus Tag: TcasGA2_TC014290] [Chromosome: LG5] [Map Location: ] [Description: spire] [Gene Type: protein-coding]	TcasGA2_TC014290; spir; LOC660878
674	NC_007420.3	8596830	SNV	T	A	Heterozygous	13	22	59.09	1	5	8	0.38	35.92	13	22	8	12	-1.3	0.9	0.93	no	A/T	No	1	66.24	XP_972626.2:c.[638T>A]; XP_008193697.1:c.[638T>A]; XP_008193698.1:c.[638T>A]	XP_972626.2:p.[Phe213Tyr]; XP_008193697.1:p.[Phe213Tyr]; XP_008193698.1:p.[Phe213Tyr]	LOC661373	661373		661373 [Gene Symbol: LOC661373] [Locus Tag: TcasGA2_TC014296] [Chromosome: LG5] [Map Location: ] [Description: T-box transcription factor TBX20] [Gene Type: protein-coding]	Tbx20; TcasGA2_TC014296; midline; H15; mid; LOC661373
675	NC_007420.3	8675921	SNV	G	T	Homozygous	18	21	85.71	0.82	14	4	0.22	36.72	18	21	8	14		1	1	no	T/T	No	1	7.36	XP_972790.1:c.337C>A	XP_972790.1:p.Leu113Ile	LOC661546	661546		661546 [Gene Symbol: LOC661546] [Locus Tag: TcasGA2_TC013506] [Chromosome: LG5] [Map Location: ] [Description: mitochondrial import inner membrane translocase subunit Tim21] [Gene Type: protein-coding]	TcasGA2_TC013506; LOC661546
676	NC_007420.3	8738742	SNV	T	C	Homozygous	29	29	100	1	7	23	0.23	38.17	30	30	14	18		1	1	no	C/C	No	1	107.2	XP_008193713.1:c.[3895A>G]; XP_008193710.1:c.[4045A>G]; XP_015836011.1:c.[3973A>G]; XP_008193712.1:c.[3946A>G]	XP_008193713.1:p.[Ile1299Val]; XP_008193710.1:p.[Ile1349Val]; XP_015836011.1:p.[Ile1325Val]; XP_008193712.1:p.[Ile1316Val]	LOC103313104	103313104		103313104 [Gene Symbol: LOC103313104] [Locus Tag: TcasGA2_TC013501] [Chromosome: LG5] [Map Location: ] [Description: homeotic protein spalt-major] [Gene Type: protein-coding]	spalt; TcasGA2_TC013501; sal; LOC103313104
677	NC_007420.3	8928505	SNV	C	T	Homozygous	20	20	100	1	12	10	0.45	37.35	22	22	14	16		1	1	no	T/T	No	1	81.7	XP_973596.2:c.1124C>T	XP_973596.2:p.Thr375Ile	LOC662406	662406		662406 [Gene Symbol: LOC662406] [Locus Tag: TcasGA2_TC014310] [Chromosome: LG5] [Map Location: ] [Description: histone-lysine N-methyltransferase SETD2] [Gene Type: protein-coding]	TcasGA2_TC014310; LOC662406
678	NC_007420.3	8928646	SNV	G	C	Homozygous	21	21	100	1	17	6	0.26	38.05	23	23	12	14		1	1	no	C/C	No	1	83.12	XP_973596.2:c.1265G>C	XP_973596.2:p.Ser422Thr	LOC662406	662406		662406 [Gene Symbol: LOC662406] [Locus Tag: TcasGA2_TC014310] [Chromosome: LG5] [Map Location: ] [Description: histone-lysine N-methyltransferase SETD2] [Gene Type: protein-coding]	TcasGA2_TC014310; LOC662406
679	NC_007420.3	8934547	SNV	C	T	Homozygous	20	20	100	1	6	16	0.27	37.3	22	22	9	11		1	1	no	T/T	No	1	81.7	XP_008193718.1:c.313G>A	XP_008193718.1:p.Ala105Thr	LOC662444	662444		662444 [Gene Symbol: LOC662444] [Locus Tag: TcasGA2_TC013493] [Chromosome: LG5] [Map Location: ] [Description: kinesin 3C] [Gene Type: protein-coding]	kinesin-3C; TcasGA2_TC013493; LOC662444; Mot; nebbish; tio; neb
680	NC_007420.3	8934850	SNV	G	A	Homozygous	27	27	100	1	11	20	0.35	40.11	31	31	9	11		1	1	no	A/A	No	1	102.74	XP_008193718.1:c.10C>T	XP_008193718.1:p.Pro4Ser	LOC662444	662444		662444 [Gene Symbol: LOC662444] [Locus Tag: TcasGA2_TC013493] [Chromosome: LG5] [Map Location: ] [Description: kinesin 3C] [Gene Type: protein-coding]	kinesin-3C; TcasGA2_TC013493; LOC662444; Mot; nebbish; tio; neb
681	NC_007420.3	8935582	SNV	G	A	Homozygous	31	31	100	1	22	9	0.29	39.71	31	31	11	18		1	1	no	A/A	No	1	114.77	XP_973661.1:c.443G>A	XP_973661.1:p.Arg148Lys	LOC662476	662476		662476 [Gene Symbol: LOC662476] [Locus Tag: TcasGA2_TC014311] [Chromosome: LG5] [Map Location: ] [Description: 39S ribosomal protein L3, mitochondrial] [Gene Type: protein-coding]	LOC662476; TcasGA2_TC014311
682	NC_007420.3	8968989	SNV	G	T	Homozygous	22	22	100	1	9	15	0.38	37.18	24	24	14	13		1	1	no	T/T	No	1	87.71	XP_008193731.1:c.[708C>A]; XP_008193732.1:c.[430-898C>A]	XP_008193731.1:p.Asp236Glu	LOC662848	662848		662848 [Gene Symbol: LOC662848] [Locus Tag: TcasGA2_TC013484] [Chromosome: LG5] [Map Location: ] [Description: gustatory receptor Gr107] [Gene Type: protein-coding]	LOC662848; Gr107; TcasGA2_TC013484
683	NC_007420.3	8970929	SNV	G	A	Homozygous	24	24	100	1	10	17	0.37	35.92	27	27	11	17		1	1	no	A/A	No	1	90.71	XP_008193731.1:c.[190C>T]; XP_008193730.1:c.[190C>T]; XP_008193732.1:c.[190C>T]	XP_008193731.1:p.[Pro64Ser]; XP_008193730.1:p.[Pro64Ser]; XP_008193732.1:p.[Pro64Ser]	LOC662848	662848		662848 [Gene Symbol: LOC662848] [Locus Tag: TcasGA2_TC013484] [Chromosome: LG5] [Map Location: ] [Description: gustatory receptor Gr107] [Gene Type: protein-coding]	LOC662848; Gr107; TcasGA2_TC013484
684	NC_007420.3	9007177	SNV	T	A	Heterozygous	5	21	23.81	0.98	3	2	0.4	37.2	5	22	4	3	1.53	0.14	0.21	no	A/T	No	1	17.87	XP_015835966.1:c.[667A>T]; XP_015835967.1:c.[667A>T]; XP_015835961.1:c.[652A>T]; XP_015835957.1:c.[667A>T]; XP_015835960.1:c.[667A>T]; XP_015835962.1:c.[667A>T]; XP_015835965.1:c.[667A>T]; XP_015835971.1:c.[652A>T]; XP_015835958.1:c.[667A>T]; XP_015835964.1:c.[667A>T]; XP_015835968.1:c.[667A>T]; XP_015835959.1:c.[667A>T]	XP_015835966.1:p.[Thr223Ser]; XP_015835967.1:p.[Thr223Ser]; XP_015835961.1:p.[Thr218Ser]; XP_015835957.1:p.[Thr223Ser]; XP_015835960.1:p.[Thr223Ser]; XP_015835962.1:p.[Thr223Ser]; XP_015835965.1:p.[Thr223Ser]; XP_015835971.1:p.[Thr218Ser]; XP_015835958.1:p.[Thr223Ser]; XP_015835964.1:p.[Thr223Ser]; XP_015835968.1:p.[Thr223Ser]; XP_015835959.1:p.[Thr223Ser]	LOC662876	662876		662876 [Gene Symbol: LOC662876] [Locus Tag: TcasGA2_TC013482] [Chromosome: LG5] [Map Location: ] [Description: protein still life, isoforms C/SIF type 2] [Gene Type: protein-coding]	TcasGA2_TC013482; LOC662876
685	NC_007420.3	9022843	SNV	A	C	Homozygous	34	34	100	1	19	19	0.5	37	38	38	17	21		1	1	no	C/C	No	1	122.25	XP_974097.1:c.222A>C	XP_974097.1:p.Leu74Phe	LOC662935	662935		662935 [Gene Symbol: LOC662935] [Locus Tag: TcasGA2_TC014317] [Chromosome: LG5] [Map Location: ] [Description: spermine oxidase] [Gene Type: protein-coding]	TcasGA2_TC014317; LOC662935
686	NC_007420.3	9042349	SNV	G	A	Homozygous	26	29	89.66	1	12	17	0.41	37.85	29	32	15	16		0.99	1	no	A/A	No	1	28.84	XP_015836120.1:c.2555C>T	XP_015836120.1:p.Pro852Leu	LOC663202	663202		663202 [Gene Symbol: LOC663202] [Locus Tag: TcasGA2_TC030779] [Chromosome: LG5] [Map Location: ] [Description: uncharacterized LOC663202] [Gene Type: protein-coding]	LOC663202; TcasGA2_TC030779
687	NC_007420.3	9042463	SNV	A	G	Heterozygous	14	22	63.64	1	10	7	0.41	37.36	17	25	9	10	-2.76	0.95	0.99	no	A/G	No	1	53.49	XP_015836120.1:c.2489T>C	XP_015836120.1:p.Ile830Thr	LOC663202	663202		663202 [Gene Symbol: LOC663202] [Locus Tag: TcasGA2_TC030779] [Chromosome: LG5] [Map Location: ] [Description: uncharacterized LOC663202] [Gene Type: protein-coding]	LOC663202; TcasGA2_TC030779
688	NC_007420.3	9089715	SNV	G	A	Homozygous	22	22	100	1	10	12	0.45	38.14	22	22	11	16		1	1	no	A/A	No	1	87.71	XP_008193734.1:c.4949C>T	XP_008193734.1:p.Pro1650Leu	LOC103313111	103313111		103313111 [Gene Symbol: LOC103313111] [Locus Tag: TcasGA2_TC013472] [Chromosome: LG5] [Map Location: ] [Description: collagen alpha-2(IV) chain] [Gene Type: protein-coding]	TcasGA2_TC013472; LOC103313111
689	NC_007420.3	9090509^9090510	Insertion	-	C	Homozygous	20	20	100	1	14	10	0.42	36.5	24	24	14	17		1	1	no	C/C	No	1	80.11	XP_008193734.1:c.4204_4205insG	XP_008193734.1:p.Asp1402fs	LOC103313111	103313111		103313111 [Gene Symbol: LOC103313111] [Locus Tag: TcasGA2_TC013472] [Chromosome: LG5] [Map Location: ] [Description: collagen alpha-2(IV) chain] [Gene Type: protein-coding]	TcasGA2_TC013472; LOC103313111
690	NC_007420.3	9113516	SNV	A	T	Homozygous	21	21	100	1	9	14	0.39	38.52	23	23	15	17		1	1	no	T/T	No	1	84.7	XP_015835630.1:c.2664A>T	XP_015835630.1:p.Gln888His	LOC663310	663310		663310 [Gene Symbol: LOC663310] [Locus Tag: TcasGA2_TC014326] [Chromosome: LG5] [Map Location: ] [Description: collagen alpha-2(IV) chain] [Gene Type: protein-coding]	TcasGA2_TC014326; LOC663310
691	NC_007420.3	9113572	SNV	C	T	Homozygous	39	39	100	1	29	19	0.4	37.46	48	48	25	29		1	1	no	T/T	No	1	138.75	XP_015835630.1:c.2720C>T	XP_015835630.1:p.Thr907Ile	LOC663310	663310		663310 [Gene Symbol: LOC663310] [Locus Tag: TcasGA2_TC014326] [Chromosome: LG5] [Map Location: ] [Description: collagen alpha-2(IV) chain] [Gene Type: protein-coding]	TcasGA2_TC014326; LOC663310
692	NC_007420.3	9114200..9114201	MNV	AT	GC	Homozygous	22	22	100	1	17	6	0.26	35.55	23	23	14	18		1	1	no	GC/GC	No	1	200	XP_015835630.1:c.3348_3349delATinsGC	XP_015835630.1:p.Ser1117Pro	LOC663310	663310		663310 [Gene Symbol: LOC663310] [Locus Tag: TcasGA2_TC014326] [Chromosome: LG5] [Map Location: ] [Description: collagen alpha-2(IV) chain] [Gene Type: protein-coding]	TcasGA2_TC014326; LOC663310
693	NC_007420.3	9114297	SNV	A	C	Homozygous	25	25	100	1	8	20	0.29	34.96	28	28	13	17		1	1	no	C/C	No	1	95.14	XP_015835630.1:c.3445A>C	XP_015835630.1:p.Asn1149His	LOC663310	663310		663310 [Gene Symbol: LOC663310] [Locus Tag: TcasGA2_TC014326] [Chromosome: LG5] [Map Location: ] [Description: collagen alpha-2(IV) chain] [Gene Type: protein-coding]	TcasGA2_TC014326; LOC663310
694	NC_007420.3	9115221	SNV	T	C	Homozygous	20	20	100	1	3	18	0.14	37.8	21	21	9	13		1	1	no	C/C	No	1	80.12	XP_015835630.1:c.4369T>C	XP_015835630.1:p.Phe1457Leu	LOC663310	663310		663310 [Gene Symbol: LOC663310] [Locus Tag: TcasGA2_TC014326] [Chromosome: LG5] [Map Location: ] [Description: collagen alpha-2(IV) chain] [Gene Type: protein-coding]	TcasGA2_TC014326; LOC663310
695	NC_007420.3	9116121	SNV	T	G	Homozygous	23	23	100	1	13	16	0.45	36.09	29	29	9	16		1	1	no	G/G	No	1	89.12	XP_015835630.1:c.5167T>G	XP_015835630.1:p.Ser1723Ala	LOC663310	663310		663310 [Gene Symbol: LOC663310] [Locus Tag: TcasGA2_TC014326] [Chromosome: LG5] [Map Location: ] [Description: collagen alpha-2(IV) chain] [Gene Type: protein-coding]	TcasGA2_TC014326; LOC663310
696	NC_007420.3	9287456	SNV	A	T	Homozygous	25	25	100	1	9	16	0.36	38.84	25	25	11	15		1	1	no	T/T	No	1	96.74	XP_001815756.1:c.[706T>A]; XP_008193754.1:c.[706T>A]	XP_001815756.1:p.[Phe236Ile]; XP_008193754.1:p.[Phe236Ile]	LOC100142497	100142497		100142497 [Gene Symbol: LOC100142497] [Locus Tag: TcasGA2_TC013455] [Chromosome: LG5] [Map Location: ] [Description: hypothetical protein] [Gene Type: protein-coding]	LOC100142497; TcasGA2_TC013455
697	NC_007420.3	9477976	SNV	A	T	Homozygous	20	20	100	1	8	16	0.33	40.15	24	24	16	11		1	1	no	T/T	No	1	81.69	XP_015835661.1:c.396T>A	XP_015835661.1:p.His132Gln	LOC107397960	107397960		107397960 [Gene Symbol: LOC107397960] [Locus Tag: ] [Chromosome: LG5] [Map Location: ] [Description: vanin-like protein 1] [Gene Type: protein-coding]	LOC107397960
698	NC_007420.3	9857595^9857596	Insertion	-	GGC	Homozygous	24	24	100	1	13	14	0.48	35.66	27	27	15	21		1	1	no	GGC/GGC	No	1	200	XP_008193555.1:c.[666_667insGCC]; XP_008193553.2:c.[2664_2665insGCC]	XP_008193555.1:p.[Asp222_Ser223insAla]; XP_008193553.2:p.[Asp888_Ser889insAla]	LOC658870, LOC658940	658870 , 658940		658870 [Gene Symbol: LOC658870] [Locus Tag: TcasGA2_TC013423] [Chromosome: LG5] [Map Location: LG5|LG5] [Description: uncharacterized LOC658870] [Gene Type: protein-coding] || 658940 [Gene Symbol: LOC658940] [Locus Tag: TcasGA2_TC013424] [Chromosome: LG5] [Map Location: ] [Description: Golgi integral membrane protein 4] [Gene Type: protein-coding]	LOC658870; TcasGA2_TC013423 || LOC658940; TcasGA2_TC013424
699	NC_007420.3	9959028..9959029	MNV	TA	CG	Homozygous	22	22	100	1	12	11	0.48	37.95	23	23	16	15		1	1	no	CG/CG	No	1	200	XP_015836094.1:c.[54_55delTAinsCG]; XP_015836093.1:c.[54_55delTAinsCG]	XP_015836094.1:p.[Ile19Val]; XP_015836093.1:p.[Ile19Val]	LOC660416	660416		660416 [Gene Symbol: LOC660416] [Locus Tag: TcasGA2_TC014381] [Chromosome: LG5] [Map Location: ] [Description: probable multidrug resistance-associated protein lethal(2)03659] [Gene Type: protein-coding]	LOC660416; TcasGA2_TC014381
700	NC_007420.3	9959172	SNV	C	A	Homozygous	20	20	100	1	14	8	0.36	36.4	22	22	10	14		1	1	no	A/A	No	1	81.69	XP_015836094.1:c.[148C>A]; XP_015836093.1:c.[148C>A]	XP_015836094.1:p.[Pro50Thr]; XP_015836093.1:p.[Pro50Thr]	LOC660416	660416		660416 [Gene Symbol: LOC660416] [Locus Tag: TcasGA2_TC014381] [Chromosome: LG5] [Map Location: ] [Description: probable multidrug resistance-associated protein lethal(2)03659] [Gene Type: protein-coding]	LOC660416; TcasGA2_TC014381
701	NC_007420.3	9965268	SNV	C	T	Homozygous	20	20	100	1	9	13	0.41	37.8	22	22	12	14		1	1	no	T/T	No	1	81.7	XP_008193591.1:c.1370C>T	XP_008193591.1:p.Thr457Ile	LOC103313070	103313070		103313070 [Gene Symbol: LOC103313070] [Locus Tag: TcasGA2_TC014382] [Chromosome: LG5] [Map Location: ] [Description: multidrug resistance-associated protein 4] [Gene Type: protein-coding]	TcasGA2_TC014382; LOC103313070
702	NC_007420.3	9976166	SNV	G	C	Homozygous	24	24	100	1	20	8	0.29	38.04	28	28	12	20		1	1	no	C/C	No	1	92.15	XP_015836126.1:c.[3092G>C]; XP_015836125.1:c.[3092G>C]	XP_015836126.1:p.[Arg1031Pro]; XP_015836125.1:p.[Arg1031Pro]	LOC660599	660599		660599 [Gene Symbol: LOC660599] [Locus Tag: TcasGA2_TC014384] [Chromosome: LG5] [Map Location: ] [Description: multidrug resistance-associated protein 4] [Gene Type: protein-coding]	LOC660599; TcasGA2_TC014384
703	NC_007420.3	9976170	SNV	G	T	Homozygous	23	23	100	1	19	8	0.3	37.78	27	27	12	19		1	1	no	T/T	No	1	90.72	XP_015836125.1:c.[3096G>T]; XP_015836126.1:c.[3096G>T]	XP_015836125.1:p.[Gln1032His]; XP_015836126.1:p.[Gln1032His]	LOC660599	660599		660599 [Gene Symbol: LOC660599] [Locus Tag: TcasGA2_TC014384] [Chromosome: LG5] [Map Location: ] [Description: multidrug resistance-associated protein 4] [Gene Type: protein-coding]	LOC660599; TcasGA2_TC014384
704	NC_007420.3	9976745	SNV	G	A	Homozygous	21	21	100	1	9	13	0.41	39.95	22	22	12	13		1	1	no	A/A	No	1	84.7	XP_015836126.1:c.[3671G>A]; XP_015836125.1:c.[3671G>A]	XP_015836126.1:p.[Ser1224Asn]; XP_015836125.1:p.[Ser1224Asn]	LOC660599	660599		660599 [Gene Symbol: LOC660599] [Locus Tag: TcasGA2_TC014384] [Chromosome: LG5] [Map Location: ] [Description: multidrug resistance-associated protein 4] [Gene Type: protein-coding]	LOC660599; TcasGA2_TC014384
705	NC_007420.3	9976757	SNV	C	T	Homozygous	20	20	100	1	9	15	0.38	37.2	24	24	13	12		1	1	no	T/T	No	1	81.69	XP_015836125.1:c.[3683C>T]; XP_015836126.1:c.[3683C>T]	XP_015836125.1:p.[Ala1228Val]; XP_015836126.1:p.[Ala1228Val]	LOC660599	660599		660599 [Gene Symbol: LOC660599] [Locus Tag: TcasGA2_TC014384] [Chromosome: LG5] [Map Location: ] [Description: multidrug resistance-associated protein 4] [Gene Type: protein-coding]	LOC660599; TcasGA2_TC014384
706	NC_007420.3	9998419	SNV	A	C	Homozygous	20	20	100	1	18	6	0.25	39.2	24	24	12	9		1	1	no	C/C	No	1	80.12	XP_015835865.1:c.[1236A>C]; XP_008193575.1:c.[1236A>C]	XP_015835865.1:p.[Leu412Phe]; XP_008193575.1:p.[Leu412Phe]	LOC103313062	103313062		103313062 [Gene Symbol: LOC103313062] [Locus Tag: TcasGA2_TC014390] [Chromosome: LG5] [Map Location: LG5|LG5] [Description: uncharacterized LOC103313062] [Gene Type: protein-coding]	TcasGA2_TC014390; P149; LOC103313062
707	NC_007420.3	9998433	SNV	C	G	Homozygous	20	20	100	1	18	8	0.31	36.85	26	26	12	10		1	1	no	G/G	No	1	80.09	XP_015835865.1:c.[1250C>G]; XP_008193575.1:c.[1250C>G]	XP_015835865.1:p.[Thr417Arg]; XP_008193575.1:p.[Thr417Arg]	LOC103313062	103313062		103313062 [Gene Symbol: LOC103313062] [Locus Tag: TcasGA2_TC014390] [Chromosome: LG5] [Map Location: LG5|LG5] [Description: uncharacterized LOC103313062] [Gene Type: protein-coding]	TcasGA2_TC014390; P149; LOC103313062
708	NC_007420.3	9998508	SNV	C	T	Homozygous	21	21	100	1	14	9	0.39	37.33	23	23	11	15		1	1	no	T/T	No	1	84.71	XP_015835865.1:c.[1325C>T]; XP_008193575.1:c.[1325C>T]	XP_015835865.1:p.[Thr442Ile]; XP_008193575.1:p.[Thr442Ile]	LOC103313062	103313062		103313062 [Gene Symbol: LOC103313062] [Locus Tag: TcasGA2_TC014390] [Chromosome: LG5] [Map Location: LG5|LG5] [Description: uncharacterized LOC103313062] [Gene Type: protein-coding]	TcasGA2_TC014390; P149; LOC103313062
709	NC_007420.3	10006447	SNV	C	G	Homozygous	20	20	100	1	14	9	0.39	37.9	23	23	10	13		1	1	no	G/G	No	1	80.09	XP_972374.2:c.350C>G	XP_972374.2:p.Ala117Gly	LOC661049, LOC661098	661049 , 661098		661049 [Gene Symbol: LOC661049] [Locus Tag: TcasGA2_TC013413] [Chromosome: LG5] [Map Location: ] [Description: beta-lactamase-like protein 2 homolog] [Gene Type: protein-coding] || 661098 [Gene Symbol: LOC661098] [Locus Tag: TcasGA2_TC014392] [Chromosome: LG5] [Map Location: ] [Description: protein D2] [Gene Type: protein-coding]	TcasGA2_TC013413; LOC661049 || LOC661098; TcasGA2_TC014392
710	NC_007420.3	10038188	SNV	G	A	Homozygous	20	20	100	1	16	10	0.38	38.35	26	26	10	14		1	1	no	A/A	No	1	81.69	XP_008193579.1:c.4858C>T	XP_008193579.1:p.Pro1620Ser	LOC661547	661547		661547 [Gene Symbol: LOC661547] [Locus Tag: TcasGA2_TC013406] [Chromosome: LG5] [Map Location: ] [Description: dedicator of cytokinesis protein 9] [Gene Type: protein-coding]	LOC661547; TcasGA2_TC013406
711	NC_007420.3	10038191	SNV	G	C	Homozygous	20	20	100	1	16	10	0.38	37.7	26	26	10	14		1	1	no	C/C	No	1	80.11	XP_008193579.1:c.4855C>G	XP_008193579.1:p.Arg1619Gly	LOC661547	661547		661547 [Gene Symbol: LOC661547] [Locus Tag: TcasGA2_TC013406] [Chromosome: LG5] [Map Location: ] [Description: dedicator of cytokinesis protein 9] [Gene Type: protein-coding]	LOC661547; TcasGA2_TC013406
712	NC_007420.3	10038196	SNV	G	A	Homozygous	20	20	100	1	15	10	0.4	38	25	25	10	14		1	1	no	A/A	No	1	78.68	XP_008193579.1:c.4850C>T	XP_008193579.1:p.Ala1617Val	LOC661547	661547		661547 [Gene Symbol: LOC661547] [Locus Tag: TcasGA2_TC013406] [Chromosome: LG5] [Map Location: ] [Description: dedicator of cytokinesis protein 9] [Gene Type: protein-coding]	LOC661547; TcasGA2_TC013406
713	NC_007420.3	10040659	SNV	G	T	Homozygous	21	21	100	1	17	4	0.19	37.67	21	21	9	16		1	1	no	T/T	No	1	84.7	XP_008193579.1:c.2545C>A	XP_008193579.1:p.Pro849Thr	LOC661547	661547		661547 [Gene Symbol: LOC661547] [Locus Tag: TcasGA2_TC013406] [Chromosome: LG5] [Map Location: ] [Description: dedicator of cytokinesis protein 9] [Gene Type: protein-coding]	LOC661547; TcasGA2_TC013406
714	NC_007420.3	10040704	SNV	C	A	Homozygous	27	27	100	1	20	12	0.38	37.74	32	32	13	21		1	1	no	A/A	No	1	102.75	XP_008193579.1:c.2500G>T	XP_008193579.1:p.Val834Phe	LOC661547	661547		661547 [Gene Symbol: LOC661547] [Locus Tag: TcasGA2_TC013406] [Chromosome: LG5] [Map Location: ] [Description: dedicator of cytokinesis protein 9] [Gene Type: protein-coding]	LOC661547; TcasGA2_TC013406
715	NC_007420.3	10040740	SNV	A	G	Homozygous	21	21	100	1	10	15	0.4	38.48	25	25	11	16		1	1	no	G/G	No	1	83.1	XP_008193579.1:c.2464T>C	XP_008193579.1:p.*822Arg	LOC661547	661547		661547 [Gene Symbol: LOC661547] [Locus Tag: TcasGA2_TC013406] [Chromosome: LG5] [Map Location: ] [Description: dedicator of cytokinesis protein 9] [Gene Type: protein-coding]	LOC661547; TcasGA2_TC013406
716	NC_007420.3	10163369	SNV	A	C	Homozygous	30	30	100	1	21	11	0.34	38.4	32	32	12	18		1	1	no	C/C	No	1	110.21	XP_015835805.1:c.2353A>C	XP_015835805.1:p.Thr785Pro	LOC662374	662374		662374 [Gene Symbol: LOC662374] [Locus Tag: TcasGA2_TC014404] [Chromosome: LG5] [Map Location: ] [Description: uncharacterized LOC662374] [Gene Type: protein-coding]	TcasGA2_TC014404; LOC662374
717	NC_007420.3	10163958	SNV	C	T	Homozygous	22	22	100	1	14	10	0.42	37.77	24	24	14	16		1	1	no	T/T	No	1	87.71	XP_015835805.1:c.2749C>T	XP_015835805.1:p.Leu917Phe	LOC662374	662374		662374 [Gene Symbol: LOC662374] [Locus Tag: TcasGA2_TC014404] [Chromosome: LG5] [Map Location: ] [Description: uncharacterized LOC662374] [Gene Type: protein-coding]	TcasGA2_TC014404; LOC662374
718	NC_007420.3	10174924	SNV	A	G	Homozygous	25	25	100	1	11	19	0.37	37.6	30	30	13	12		1	1	no	G/G	No	1	95.14	XP_015835840.1:c.[484T>C]; XP_973728.1:c.[532T>C]	XP_015835840.1:p.[Phe162Leu]; XP_973728.1:p.[Phe178Leu]	LOC662545	662545		662545 [Gene Symbol: LOC662545] [Locus Tag: TcasGA2_TC013393] [Chromosome: LG5] [Map Location: ] [Description: dolichyldiphosphatase 1] [Gene Type: protein-coding]	TcasGA2_TC013393; LOC662545
719	NC_007420.3	10194572	SNV	G	A	Homozygous	24	24	100	1	11	13	0.46	38.92	24	24	15	19		1	1	no	A/A	No	1	93.72	XP_008193838.1:c.[1338-67C>T]; XP_015835810.1:c.[1455-67C>T]; XP_008193837.1:c.[22G>A]; XP_015835811.1:c.[1410-67C>T]	XP_008193837.1:p.Gly8Ser	LOC662674, LOC662642, LOC103313142	662674 , 662642 , 103313142		662674 [Gene Symbol: LOC662674] [Locus Tag: TcasGA2_TC014410] [Chromosome: LG5] [Map Location: ] [Description: guanine nucleotide-binding protein subunit beta-2] [Gene Type: protein-coding] || 662642 [Gene Symbol: LOC662642] [Locus Tag: TcasGA2_TC013390] [Chromosome: LG5] [Map Location: ] [Description: procollagen-lysine,2-oxoglutarate 5-dioxygenase 1] [Gene Type: protein-coding] || 103313142 [Ge…	LOC662674; TcasGA2_TC014410 || TcasGA2_TC013390; LOC662642 || TcasGA2_TC014408; LOC103313142
720	NC_007420.3	10202200	SNV	G	A	Homozygous	20	20	100	1	7	13	0.35	38.65	20	20	9	8		1	1	no	A/A	No	1	81.69	XP_973883.2:c.584C>T	XP_973883.2:p.Ala195Val	LOC662707	662707		662707 [Gene Symbol: LOC662707] [Locus Tag: TcasGA2_TC013389] [Chromosome: LG5] [Map Location: ] [Description: leukocyte elastase inhibitor] [Gene Type: protein-coding]	LOC662707; serpin29; TcasGA2_TC013389
721	NC_007420.3	10216410	Deletion	G	-	Homozygous	24	24	100	1	10	14	0.42	35.62	24	24	13	17		1	1	no	-/-	No	1	102.75	XP_008193848.2:c.181delC	XP_008193848.2:p.Arg61fs	LOC103313143	103313143		103313143 [Gene Symbol: LOC103313143] [Locus Tag: ] [Chromosome: LG5] [Map Location: ] [Description: uncharacterized LOC103313143] [Gene Type: protein-coding]	LOC103313143
722	NC_007420.3	10218273	SNV	T	C	Homozygous	20	20	100	1	10	15	0.4	37.95	25	25	12	15		1	1	no	C/C	No	1	80.11	XP_973990.1:c.289A>G	XP_973990.1:p.Ile97Val	LOC662820	662820		662820 [Gene Symbol: LOC662820] [Locus Tag: TcasGA2_TC013385] [Chromosome: LG5] [Map Location: ] [Description: GDP-fucose protein O-fucosyltransferase 1] [Gene Type: protein-coding]	TcasGA2_TC013385; LOC662820
723	NC_007420.3	10250740..10250741	MNV	CG	TA	Homozygous	21	21	100	1	11	14	0.44	35.27	25	25	14	16		1	1	no	TA/TA	No	1	200	XP_008193854.1:c.852_853delCGinsTA	XP_008193854.1:p.Val285Ile	LOC663179	663179		663179 [Gene Symbol: LOC663179] [Locus Tag: TcasGA2_TC014420] [Chromosome: LG5] [Map Location: ] [Description: extended synaptotagmin-like protein 2b] [Gene Type: protein-coding]	TcasGA2_TC014420; LOC663179; Esyt2b
724	NC_007420.3	10252447	SNV	G	A	Homozygous	21	21	100	1	10	15	0.4	37.05	25	25	9	12		1	1	no	A/A	No	1	84.7	XP_008193854.1:c.2195G>A	XP_008193854.1:p.Gly732Glu	LOC663179	663179		663179 [Gene Symbol: LOC663179] [Locus Tag: TcasGA2_TC014420] [Chromosome: LG5] [Map Location: ] [Description: extended synaptotagmin-like protein 2b] [Gene Type: protein-coding]	TcasGA2_TC014420; LOC663179; Esyt2b
725	NC_007420.3	10255494	SNV	A	G	Homozygous	21	21	100	1	13	11	0.46	37.48	24	24	11	13		1	1	no	G/G	No	1	83.1	XP_015835816.1:c.[1675A>G]; XP_015835815.1:c.[1675A>G]; XP_015835814.1:c.[1675A>G]; XP_008193857.1:c.[1675A>G]	XP_015835816.1:p.[Lys559Glu]; XP_015835815.1:p.[Lys559Glu]; XP_015835814.1:p.[Lys559Glu]; XP_008193857.1:p.[Lys559Glu]	LOC663203	663203		663203 [Gene Symbol: LOC663203] [Locus Tag: TcasGA2_TC014421] [Chromosome: LG5] [Map Location: ] [Description: extended synaptotagmin-like protein 2c] [Gene Type: protein-coding]	LOC663203; Esyt2c; GLEAN_14421; TcasGA2_TC014421
726	NC_007420.3	10257294	SNV	C	T	Homozygous	26	26	100	1	18	11	0.38	36.12	29	29	15	13		1	1	no	T/T	No	1	99.74	XP_008193906.1:c.199G>A	XP_008193906.1:p.Ala67Thr	LOC103313160	103313160		103313160 [Gene Symbol: LOC103313160] [Locus Tag: TcasGA2_TC013380] [Chromosome: LG5] [Map Location: ] [Description: gastrula zinc finger protein XlCGF8.2DB] [Gene Type: protein-coding]	TcasGA2_TC013380; LOC103313160
727	NC_007420.3	10257296	SNV	T	C	Homozygous	26	26	100	1	19	10	0.34	36.46	29	29	14	12		1	1	no	C/C	No	1	98.17	XP_008193906.1:c.197A>G	XP_008193906.1:p.His66Arg	LOC103313160	103313160		103313160 [Gene Symbol: LOC103313160] [Locus Tag: TcasGA2_TC013380] [Chromosome: LG5] [Map Location: ] [Description: gastrula zinc finger protein XlCGF8.2DB] [Gene Type: protein-coding]	TcasGA2_TC013380; LOC103313160
728	NC_007420.3	10278393	SNV	A	G	Homozygous	30	30	100	1	9	22	0.29	36.47	31	31	14	18		1	1	no	G/G	No	1	110.19	XP_008193882.1:c.[866A>G]; XP_015835803.1:c.[866A>G]; XP_015835804.1:c.[866A>G]	XP_008193882.1:p.[Asp289Gly]; XP_015835803.1:p.[Asp289Gly]; XP_015835804.1:p.[Asp289Gly]	LOC663311	663311		663311 [Gene Symbol: LOC663311] [Locus Tag: TcasGA2_TC014424] [Chromosome: LG5] [Map Location: ] [Description: regulating synaptic membrane exocytosis protein 2] [Gene Type: protein-coding]	LOC663311; TcasGA2_TC014424
729	NC_007420.3	10314258	SNV	A	G	Homozygous	26	26	100	1	24	4	0.14	38.23	28	28	10	21		1	1	no	G/G	No	1	98.14	XP_974527.1:c.899T>C	XP_974527.1:p.Val300Ala	LOC663383	663383		663383 [Gene Symbol: LOC663383] [Locus Tag: TcasGA2_TC013377] [Chromosome: LG5] [Map Location: ] [Description: exostosin-3] [Gene Type: protein-coding]	LOC663383; TcasGA2_TC013377
730	NC_007420.3	10314330	SNV	T	C	Homozygous	21	21	100	1	20	10	0.33	35.86	30	30	6	17		1	1	no	C/C	No	1	83.12	XP_974527.1:c.827A>G	XP_974527.1:p.Gln276Arg	LOC663383	663383		663383 [Gene Symbol: LOC663383] [Locus Tag: TcasGA2_TC013377] [Chromosome: LG5] [Map Location: ] [Description: exostosin-3] [Gene Type: protein-coding]	LOC663383; TcasGA2_TC013377
731	NC_007420.3	10414738	SNV	G	A	Homozygous	24	24	100	1	15	12	0.44	38.58	27	27	13	15		1	1	no	A/A	No	1	93.72	XP_008193873.1:c.56C>T	XP_008193873.1:p.Pro19Leu	LOC103313148	103313148		103313148 [Gene Symbol: LOC103313148] [Locus Tag: TcasGA2_TC013371] [Chromosome: LG5] [Map Location: ] [Description: jmjC domain-containing protein 4] [Gene Type: protein-coding]	TcasGA2_TC013371; LOC103313148
732	NC_007420.3	10454847	SNV	A	G	Homozygous	19	21	90.48	1	14	8	0.36	38.26	22	24	10	13		1	1	no	G/G	No	1	23.43	XP_015835799.1:c.[6570+125A>G]; XP_015835798.1:c.[6484A>G]; XP_015835800.1:c.[6402-338A>G]	XP_015835798.1:p.Ser2162Gly	LOC663619	663619		663619 [Gene Symbol: LOC663619] [Locus Tag: TcasGA2_TC014438] [Chromosome: LG5] [Map Location: ] [Description: nucleoprotein TPR] [Gene Type: protein-coding]	LOC663619; TcasGA2_TC014438
733	NC_007420.3	10454853	SNV	G	T	Heterozygous	5	22	22.73	0.94	1	5	0.17	38.6	6	24	2	4	0.16	0.01	0.36	no	G/T	No	1	11.99	XP_015835799.1:c.[6570+131G>T]; XP_015835800.1:c.[6402-332G>T]; XP_015835798.1:c.[6490G>T]	XP_015835798.1:p.Glu2164*	LOC663619	663619		663619 [Gene Symbol: LOC663619] [Locus Tag: TcasGA2_TC014438] [Chromosome: LG5] [Map Location: ] [Description: nucleoprotein TPR] [Gene Type: protein-coding]	LOC663619; TcasGA2_TC014438
734	NC_007420.3	10454874	SNV	G	C	Homozygous	20	20	100	1	14	7	0.33	37.35	21	21	10	14		1	1	no	C/C	No	1	80.12	XP_015835800.1:c.[6402-311G>C]; XP_015835799.1:c.[6570+152G>C]; XP_015835798.1:c.[6511G>C]	XP_015835798.1:p.Asp2171His	LOC663619	663619		663619 [Gene Symbol: LOC663619] [Locus Tag: TcasGA2_TC014438] [Chromosome: LG5] [Map Location: ] [Description: nucleoprotein TPR] [Gene Type: protein-coding]	LOC663619; TcasGA2_TC014438
735	NC_007420.3	10455569	SNV	T	A	Heterozygous	16	26	61.54	1	10	9	0.47	36.62	19	32	10	12	-1.53	0.92	1	no	A/T	No	1	70.65	XP_976459.1:c.426A>T	XP_976459.1:p.Arg142Ser	LOC663636	663636		663636 [Gene Symbol: LOC663636] [Locus Tag: TcasGA2_TC013366] [Chromosome: LG5] [Map Location: ] [Description: uncharacterized LOC663636] [Gene Type: protein-coding]	LOC663636; TcasGA2_TC013366
736	NC_007420.3	10455580	SNV	A	G	Homozygous	33	35	94.29	1	17	19	0.47	38.82	36	38	19	22		0.99	1	no	G/G	No	1	64.19	XP_976459.1:c.415T>C	XP_976459.1:p.Ser139Pro	LOC663636	663636		663636 [Gene Symbol: LOC663636] [Locus Tag: TcasGA2_TC013366] [Chromosome: LG5] [Map Location: ] [Description: uncharacterized LOC663636] [Gene Type: protein-coding]	LOC663636; TcasGA2_TC013366
737	NC_007420.3	10455601	SNV	T	C	Heterozygous	18	31	58.06	1	9	12	0.43	38.78	21	34	10	12	-0.22	0.69	1	no	C/T	No	1	91.79	XP_976459.1:c.394A>G	XP_976459.1:p.Ile132Val	LOC663636	663636		663636 [Gene Symbol: LOC663636] [Locus Tag: TcasGA2_TC013366] [Chromosome: LG5] [Map Location: ] [Description: uncharacterized LOC663636] [Gene Type: protein-coding]	LOC663636; TcasGA2_TC013366
738	NC_007420.3	10671888	SNV	C	T	Homozygous	26	26	100	1	6	20	0.23	35.35	26	26	16	16		1	1	no	T/T	No	1	99.75	XP_015835806.1:c.298G>A	XP_015835806.1:p.Ala100Thr	LOC663878	663878		663878 [Gene Symbol: LOC663878] [Locus Tag: TcasGA2_TC013351] [Chromosome: LG5] [Map Location: ] [Description: uncharacterized LOC663878] [Gene Type: protein-coding]	LOC663878; TcasGA2_TC013351
739	NC_007420.3	10673050	SNV	C	A	Homozygous	20	20	100	1	10	12	0.45	36.35	22	22	12	12		1	1	no	A/A	No	1	81.69	XP_008193897.1:c.1884G>T	XP_008193897.1:p.Lys628Asn	LOC103313157	103313157		103313157 [Gene Symbol: LOC103313157] [Locus Tag: TcasGA2_TC013350] [Chromosome: LG5] [Map Location: ] [Description: zinc finger protein DZIP1L] [Gene Type: protein-coding]	TcasGA2_TC013350; LOC103313157
740	NC_007420.3	10673463	SNV	T	A	Homozygous	20	20	100	1	17	5	0.23	38.45	22	22	13	13		1	1	no	A/A	No	1	81.69	XP_008193897.1:c.1516A>T	XP_008193897.1:p.Met506Leu	LOC103313157	103313157		103313157 [Gene Symbol: LOC103313157] [Locus Tag: TcasGA2_TC013350] [Chromosome: LG5] [Map Location: ] [Description: zinc finger protein DZIP1L] [Gene Type: protein-coding]	TcasGA2_TC013350; LOC103313157
741	NC_007420.3	10673535..10673536	MNV	TA	CC	Homozygous	20	20	100	1	11	13	0.46	38.2	24	24	18	17		1	1	no	CC/CC	No	1	200	XP_008193897.1:c.1443_1444delTAinsGG	XP_008193897.1:p.Asn481_Ile482delinsLysVal	LOC103313157	103313157		103313157 [Gene Symbol: LOC103313157] [Locus Tag: TcasGA2_TC013350] [Chromosome: LG5] [Map Location: ] [Description: zinc finger protein DZIP1L] [Gene Type: protein-coding]	TcasGA2_TC013350; LOC103313157
742	NC_007420.3	10692654	SNV	G	A	Homozygous	21	21	100	1	14	10	0.42	36.86	24	24	13	16		1	1	no	A/A	No	1	84.7	XP_008193900.1:c.2447C>T	XP_008193900.1:p.Ala816Val	LOC663972	663972		663972 [Gene Symbol: LOC663972] [Locus Tag: TcasGA2_TC013347] [Chromosome: LG5] [Map Location: ] [Description: DNA repair protein complementing XP-G cells homolog] [Gene Type: protein-coding]	TcasGA2_TC013347; LOC663972
743	NC_007420.3	10693592	SNV	T	C	Homozygous	25	25	100	1	7	19	0.27	38.12	26	26	11	13		1	1	no	C/C	No	1	95.16	XP_008193900.1:c.1561A>G	XP_008193900.1:p.Ile521Val	LOC663972	663972		663972 [Gene Symbol: LOC663972] [Locus Tag: TcasGA2_TC013347] [Chromosome: LG5] [Map Location: ] [Description: DNA repair protein complementing XP-G cells homolog] [Gene Type: protein-coding]	TcasGA2_TC013347; LOC663972
744	NC_007420.3	10693594	SNV	G	A	Homozygous	22	22	100	1	7	16	0.3	38.32	23	23	10	11		1	1	no	A/A	No	1	87.71	XP_008193900.1:c.1559C>T	XP_008193900.1:p.Ser520Phe	LOC663972	663972		663972 [Gene Symbol: LOC663972] [Locus Tag: TcasGA2_TC013347] [Chromosome: LG5] [Map Location: ] [Description: DNA repair protein complementing XP-G cells homolog] [Gene Type: protein-coding]	TcasGA2_TC013347; LOC663972
745	NC_007420.3	10693634	SNV	C	T	Homozygous	27	27	100	1	11	16	0.41	39.52	27	27	14	16		1	1	no	T/T	No	1	102.75	XP_008193900.1:c.1519G>A	XP_008193900.1:p.Glu507Lys	LOC663972	663972		663972 [Gene Symbol: LOC663972] [Locus Tag: TcasGA2_TC013347] [Chromosome: LG5] [Map Location: ] [Description: DNA repair protein complementing XP-G cells homolog] [Gene Type: protein-coding]	TcasGA2_TC013347; LOC663972
746	NC_007420.3	10920804	SNV	C	T	Homozygous	20	20	100	1	5	16	0.24	37.75	21	21	11	11		1	1	no	T/T	No	1	81.7	XP_966996.1:c.40G>A	XP_966996.1:p.Val14Ile	LOC655363	655363		655363 [Gene Symbol: LOC655363] [Locus Tag: TcasGA2_TC013339] [Chromosome: LG5] [Map Location: ] [Description: EGF domain-specific O-linked N-acetylglucosamine transferase] [Gene Type: protein-coding]	TcasGA2_TC013339; LOC655363
747	NC_007420.3	11080395	SNV	A	C	Homozygous	21	21	100	1	4	20	0.17	37.71	24	24	11	12		1	1	no	C/C	No	1	83.13	XP_008193918.1:c.[401A>C]; XP_015835845.1:c.[390+11A>C]	XP_008193918.1:p.Gln134Pro	LOC656765, LOC656853	656765 , 656853		656765 [Gene Symbol: LOC656765] [Locus Tag: TcasGA2_TC014486] [Chromosome: LG5] [Map Location: ] [Description: general odorant-binding protein 69a] [Gene Type: protein-coding] || 656853 [Gene Symbol: LOC656853] [Locus Tag: TcasGA2_TC013322] [Chromosome: LG5] [Map Location: ] [Description: general odorant-binding protein 83a] [Gene Type: protein-coding]	LOC656765; TcasGA2_TC014486; OBP08 || OBP06; TcasGA2_TC013322; OBP07; LOC656853
748	NC_007420.3	11080424	Deletion	T	-	Homozygous	22	22	100	1	2	22	0.08	39.23	24	24	11	13		1	1	no	-/-	No	1	96.73	XP_015835845.1:c.[391-10delT]; XP_008193918.1:c.[430delT]	XP_008193918.1:p.Ser146fs	LOC656765, LOC656853	656765 , 656853		656765 [Gene Symbol: LOC656765] [Locus Tag: TcasGA2_TC014486] [Chromosome: LG5] [Map Location: ] [Description: general odorant-binding protein 69a] [Gene Type: protein-coding] || 656853 [Gene Symbol: LOC656853] [Locus Tag: TcasGA2_TC013322] [Chromosome: LG5] [Map Location: ] [Description: general odorant-binding protein 83a] [Gene Type: protein-coding]	LOC656765; TcasGA2_TC014486; OBP08 || OBP06; TcasGA2_TC013322; OBP07; LOC656853
749	NC_007420.3	11159717	SNV	A	G	Homozygous	23	23	100	1	12	12	0.5	36.04	24	24	14	18		1	1	no	G/G	No	1	89.12	XP_015835632.1:c.4921A>G	XP_015835632.1:p.Ser1641Gly	LOC657413	657413		657413 [Gene Symbol: LOC657413] [Locus Tag: ] [Chromosome: LG5] [Map Location: ] [Description: hydrocephalus-inducing protein-like] [Gene Type: protein-coding]	LOC657413
750	NC_007420.3	11184778	SNV	T	G	Homozygous	21	21	100	1	16	5	0.24	37.62	21	21	12	18		1	1	no	G/G	No	1	83.09	XP_015835756.1:c.[3993T>G]; XP_008193949.1:c.[3993T>G]; XP_015835757.1:c.[3993T>G]	XP_015835756.1:p.[Asp1331Glu]; XP_008193949.1:p.[Asp1331Glu]; XP_015835757.1:p.[Asp1331Glu]	LOC103313173	103313173		103313173 [Gene Symbol: LOC103313173] [Locus Tag: TcasGA2_TC014491] [Chromosome: LG5] [Map Location: ] [Description: LRR receptor-like serine/threonine-protein kinase GSO2] [Gene Type: protein-coding]	LOC103313173; TcasGA2_TC014491
751	NC_007420.3	11309079	SNV	G	A	Homozygous	22	22	100	1	17	5	0.23	37.86	22	22	9	17		1	1	no	A/A	No	1	87.71	XP_015836106.1:c.[112G>A]; XP_015836104.1:c.[112G>A]; XP_015836107.1:c.[112G>A]; XP_015836102.1:c.[112G>A]; XP_015836103.1:c.[112G>A]; XP_015836105.1:c.[112G>A]	XP_015836106.1:p.[Glu38Lys]; XP_015836104.1:p.[Glu38Lys]; XP_015836107.1:p.[Glu38Lys]; XP_015836102.1:p.[Glu38Lys]; XP_015836103.1:p.[Glu38Lys]; XP_015836105.1:p.[Glu38Lys]	LOC107398017	107398017		107398017 [Gene Symbol: LOC107398017] [Locus Tag: TcasGA2_TC014504] [Chromosome: LG5] [Map Location: ] [Description: hypothetical protein] [Gene Type: protein-coding]	LOC107398017; TcasGA2_TC014504
752	NC_007420.3	11505121	SNV	T	C	Homozygous	20	20	100	1	12	14	0.46	37.65	26	26	12	12		1	1	no	C/C	No	1	80.11	XP_015835634.1:c.6314T>C	XP_015835634.1:p.Leu2105Ser	LOC655574	655574		655574 [Gene Symbol: LOC655574] [Locus Tag: TcasGA2_TC014546] [Chromosome: LG5] [Map Location: ] [Description: uncharacterized protein PFB0145c] [Gene Type: protein-coding]	TcasGA2_TC014546; LOC655574
753	NC_007420.3	11556114	SNV	G	T	Homozygous	20	20	100	1	14	7	0.33	37.55	21	21	10	13		1	1	no	T/T	No	1	81.7	XP_008193991.1:c.[469C>A]; XP_008193990.1:c.[469C>A]	XP_008193991.1:p.[Leu157Met]; XP_008193990.1:p.[Leu157Met]	LOC100141626	100141626		100141626 [Gene Symbol: LOC100141626] [Locus Tag: TcasGA2_TC013249] [Chromosome: LG5] [Map Location: ] [Description: putative transferase CAF17 homolog, mitochondrial] [Gene Type: protein-coding]	TcasGA2_TC013249; LOC100141626
754	NC_007420.3	11912174	SNV	G	A	Homozygous	27	27	100	1	8	19	0.3	36	27	27	12	18		1	1	no	A/A	No	1	102.74	XP_008194015.1:c.1467G>A	XP_008194015.1:p.Met489Ile	LOC103313192	103313192		103313192 [Gene Symbol: LOC103313192] [Locus Tag: TcasGA2_TC014573] [Chromosome: LG5] [Map Location: ] [Description: cGMP-dependent protein kinase, isozyme 1] [Gene Type: protein-coding]	TcasGA2_TC014573; LOC103313192
755	NC_007420.3	12089142	SNV	T	C	Homozygous	20	20	100	1	8	17	0.32	35.85	25	25	8	15		1	1	no	C/C	No	1	77.11	XP_969335.1:c.728T>C	XP_969335.1:p.Val243Ala	LOC657807	657807		657807 [Gene Symbol: LOC657807] [Locus Tag: TcasGA2_TC014579] [Chromosome: LG5] [Map Location: ] [Description: cilia- and flagella-associated protein 20] [Gene Type: protein-coding]	LOC657807; TcasGA2_TC014579
756	NC_007420.3	12130761	SNV	C	G	Homozygous	20	20	100	1	14	8	0.36	38.15	22	22	14	14		1	1	no	G/G	No	1	80.09	XP_008194030.2:c.2251G>C	XP_008194030.2:p.Gly751Arg	LOC100141837	100141837		100141837 [Gene Symbol: LOC100141837] [Locus Tag: TcasGA2_TC013215] [Chromosome: LG5] [Map Location: ] [Description: neprilysin-2] [Gene Type: protein-coding]	TcasGA2_TC013215; LOC100141837
757	NC_007420.3	12131601	Deletion	G	-	Homozygous	25	25	100	1	13	13	0.5	38	26	26	12	15		1	1	no	-/-	No	1	102.8	XP_008194030.2:c.1501delC	XP_008194030.2:p.Leu501fs	LOC100141837	100141837		100141837 [Gene Symbol: LOC100141837] [Locus Tag: TcasGA2_TC013215] [Chromosome: LG5] [Map Location: ] [Description: neprilysin-2] [Gene Type: protein-coding]	TcasGA2_TC013215; LOC100141837
758	NC_007420.3	12140480	SNV	G	A	Homozygous	20	20	100	1	9	14	0.39	36.25	23	23	13	14		1	1	no	A/A	No	1	81.69	XP_008194036.1:c.145G>A	XP_008194036.1:p.Val49Ile	LOC103313197	103313197		103313197 [Gene Symbol: LOC103313197] [Locus Tag: TcasGA2_TC014587] [Chromosome: LG5] [Map Location: ] [Description: secernin-3] [Gene Type: protein-coding]	TcasGA2_TC014587; LOC103313197
759	NC_007420.3	12207859	SNV	G	A	Homozygous	21	21	100	1	13	10	0.43	38.71	23	23	12	11		1	1	no	A/A	No	1	84.7	XP_015836183.1:c.1187G>A	XP_015836183.1:p.Gly396Glu	LOC655129	655129		655129 [Gene Symbol: LOC655129] [Locus Tag: TcasGA2_TC014596] [Chromosome: LG5] [Map Location: ] [Description: leucine-rich repeat-containing protein 34] [Gene Type: protein-coding]	TcasGA2_TC014596; LOC655129
760	NC_007420.3	12277181	SNV	A	G	Homozygous	29	29	100	1	24	8	0.25	37.76	32	32	15	18		1	1	no	G/G	No	1	107.18	XP_008194222.1:c.238A>G	XP_008194222.1:p.Thr80Ala	LOC103313237	103313237		103313237 [Gene Symbol: LOC103313237] [Locus Tag: TcasGA2_TC014602] [Chromosome: LG5] [Map Location: ] [Description: golgin subfamily A member 2] [Gene Type: protein-coding]	LOC103313237; TcasGA2_TC014602
761	NC_007420.3	12277358	SNV	C	A	Homozygous	28	28	100	1	12	19	0.39	37.54	31	31	15	16		1	1	no	A/A	No	1	105.76	XP_008194222.1:c.415C>A	XP_008194222.1:p.Arg139Ser	LOC103313237	103313237		103313237 [Gene Symbol: LOC103313237] [Locus Tag: TcasGA2_TC014602] [Chromosome: LG5] [Map Location: ] [Description: golgin subfamily A member 2] [Gene Type: protein-coding]	LOC103313237; TcasGA2_TC014602
762	NC_007420.3	12281746	SNV	G	T	Homozygous	28	28	100	1	18	14	0.44	38.11	32	32	11	16		1	1	no	T/T	No	1	105.76	XP_001809587.2:c.1144C>A	XP_001809587.2:p.Pro382Thr	LOC100141811	100141811		100141811 [Gene Symbol: LOC100141811] [Locus Tag: TcasGA2_TC013210] [Chromosome: LG5] [Map Location: ] [Description: zinc finger protein 2 homolog] [Gene Type: protein-coding]	LOC100141811; TcasGA2_TC013210
763	NC_007420.3	12506440	SNV	A	G	Homozygous	21	21	100	1	15	10	0.4	36.38	25	25	10	18		1	1	no	G/G	No	1	83.1	XP_015836040.1:c.[979A>G]; XP_969407.1:c.[826A>G]; XP_008194248.1:c.[826A>G]; XP_015836041.1:c.[826A>G]; XP_008194247.1:c.[979A>G]; XP_008194246.1:c.[979A>G]; XP_008194249.1:c.[826A>G]	XP_015836040.1:p.[Ser327Gly]; XP_969407.1:p.[Ser276Gly]; XP_008194248.1:p.[Ser276Gly]; XP_015836041.1:p.[Ser276Gly]; XP_008194247.1:p.[Ser327Gly]; XP_008194246.1:p.[Ser327Gly]; XP_008194249.1:p.[Ser276Gly]	LOC657653, LOC657885	657653 , 657885		657653 [Gene Symbol: LOC657653] [Locus Tag: TcasGA2_TC013195] [Chromosome: LG5] [Map Location: ] [Description: uncharacterized LOC657653] [Gene Type: protein-coding] || 657885 [Gene Symbol: LOC657885] [Locus Tag: TcasGA2_TC014620] [Chromosome: LG5] [Map Location: ] [Description: anoctamin-10] [Gene Type: protein-coding]	LOC657653; TcasGA2_TC013195 || LOC657885; Axs; TcasGA2_TC014620
764	NC_007420.3	12556133	SNV	G	A	Homozygous	26	26	100	1	20	9	0.31	37.85	29	29	12	16		1	1	no	A/A	No	1	99.74	XP_969911.1:c.[4628G>A]; XP_008194255.1:c.[4637G>A]	XP_969911.1:p.[Ser1543Asn]; XP_008194255.1:p.[Ser1546Asn]	LOC658430	658430		658430 [Gene Symbol: LOC658430] [Locus Tag: TcasGA2_TC014624] [Chromosome: LG5] [Map Location: ] [Description: death-inducer obliterator 1] [Gene Type: protein-coding]	LOC658430; TcasGA2_TC014624
765	NC_007420.3	12593536	SNV	T	C	Heterozygous	5	22	22.73	0.98	2	3	0.4	38.2	5	22	4	4	0.71	0.19	1	no	C/T	No	1	16.44	XP_008194264.1:c.1325A>G	XP_008194264.1:p.Asn442Ser	LOC659014	659014		659014 [Gene Symbol: LOC659014] [Locus Tag: TcasGA2_TC013188] [Chromosome: LG5] [Map Location: ] [Description: hypothetical protein] [Gene Type: protein-coding]	LOC659014; TcasGA2_TC013188
766	NC_007420.3	12593542	SNV	T	A	Heterozygous	5	22	22.73	0.97	2	3	0.4	39	5	22	4	4	1.06	0.54	1	no	A/T	No	1	15.16	XP_008194264.1:c.1319A>T	XP_008194264.1:p.Asn440Ile	LOC659014	659014		659014 [Gene Symbol: LOC659014] [Locus Tag: TcasGA2_TC013188] [Chromosome: LG5] [Map Location: ] [Description: hypothetical protein] [Gene Type: protein-coding]	LOC659014; TcasGA2_TC013188
767	NC_007420.3	12642985	SNV	C	T	Heterozygous	18	26	69.23	1	7	11	0.39	37.89	18	28	8	9	-1.03	0.93	0.81	no	C/T	No	1	43.52	XP_015835746.1:c.[361C>T]; XP_015835745.1:c.[361C>T]	XP_015835746.1:p.[Gln121*]; XP_015835745.1:p.[Gln121*]	LOC107397971	107397971		107397971 [Gene Symbol: LOC107397971] [Locus Tag: ] [Chromosome: LG5] [Map Location: ] [Description: uncharacterized LOC107397971] [Gene Type: protein-coding]	LOC107397971
768	NC_007420.3	12643075	SNV	T	C	Homozygous	21	21	100	1	8	13	0.38	37.48	21	21	10	14		1	1	no	C/C	No	1	83.13	XP_015835746.1:c.[451T>C]; XP_015835745.1:c.[451T>C]	XP_015835746.1:p.[Ser151Pro]; XP_015835745.1:p.[Ser151Pro]	LOC107397971	107397971		107397971 [Gene Symbol: LOC107397971] [Locus Tag: ] [Chromosome: LG5] [Map Location: ] [Description: uncharacterized LOC107397971] [Gene Type: protein-coding]	LOC107397971
769	NC_007420.3	12687286	SNV	C	T	Homozygous	27	27	100	1	17	12	0.41	36.22	29	29	15	19		1	1	no	T/T	No	1	102.75	XP_008194279.1:c.1903C>T	XP_008194279.1:p.Pro635Ser	LOC660112	660112		660112 [Gene Symbol: LOC660112] [Locus Tag: TcasGA2_TC014637] [Chromosome: LG5] [Map Location: ] [Description: fibril-forming collagen alpha chain] [Gene Type: protein-coding]	TcasGA2_TC014637; LOC660112
770	NC_007420.3	12688171	SNV	C	T	Heterozygous	6	22	27.27	1	1	6	0.14	37.83	7	24	4	5	0.66	1	1	no	C/T	No	1	27.97	XP_008194279.1:c.2696C>T	XP_008194279.1:p.Pro899Leu	LOC660112	660112		660112 [Gene Symbol: LOC660112] [Locus Tag: TcasGA2_TC014637] [Chromosome: LG5] [Map Location: ] [Description: fibril-forming collagen alpha chain] [Gene Type: protein-coding]	TcasGA2_TC014637; LOC660112
771	NC_007420.3	12688677	SNV	C	G	Heterozygous	9	22	40.91	1	8	2	0.2	37.78	10	24	5	7	0.6	0.25	0.94	no	C/G	No	1	66.13	XP_008194279.1:c.3202C>G	XP_008194279.1:p.Pro1068Ala	LOC660112	660112		660112 [Gene Symbol: LOC660112] [Locus Tag: TcasGA2_TC014637] [Chromosome: LG5] [Map Location: ] [Description: fibril-forming collagen alpha chain] [Gene Type: protein-coding]	TcasGA2_TC014637; LOC660112
772	NC_007420.3	12688738	SNV	C	T	Heterozygous	14	22	63.64	1	6	11	0.35	36.64	17	26	8	10	-1.13	0.94	1	no	C/T	No	1	54.63	XP_008194279.1:c.3263C>T	XP_008194279.1:p.Pro1088Leu	LOC660112	660112		660112 [Gene Symbol: LOC660112] [Locus Tag: TcasGA2_TC014637] [Chromosome: LG5] [Map Location: ] [Description: fibril-forming collagen alpha chain] [Gene Type: protein-coding]	TcasGA2_TC014637; LOC660112
773	NC_007420.3	12703961	SNV	C	T	Homozygous	20	20	100	1	7	16	0.3	38.65	23	23	11	12		1	1	no	T/T	No	1	81.69	XP_008194283.1:c.[1015G>A]; XP_001812538.1:c.[1015G>A]; XP_008194282.1:c.[1015G>A]	XP_008194283.1:p.[Ala339Thr]; XP_001812538.1:p.[Ala339Thr]; XP_008194282.1:p.[Ala339Thr]	LOC100142152	100142152		100142152 [Gene Symbol: LOC100142152] [Locus Tag: TcasGA2_TC030773] [Chromosome: LG5] [Map Location: ] [Description: nucleolin 1] [Gene Type: protein-coding]	LOC100142152; TcasGA2_TC030773
774	NC_007420.3	12711791	SNV	T	C	Homozygous	22	22	100	1	16	8	0.33	38.18	24	24	12	15		1	1	no	C/C	No	1	86.13	XP_008194285.1:c.1133T>C	XP_008194285.1:p.Val378Ala	LOC100141738	100141738		100141738 [Gene Symbol: LOC100141738] [Locus Tag: TcasGA2_TC014639] [Chromosome: LG5] [Map Location: ] [Description: transmembrane protein 26] [Gene Type: protein-coding]	LOC100141738; TcasGA2_TC014639
775	NC_007420.3	12711826..12711834	Deletion	AAGAAACTG	-	Homozygous	25	26	96.15	1	19	8	0.3	37.24	27	28	15	20		1	1	no	-/-	No	1	200	XP_008194285.1:c.1168_1176delAAGAAACTG	XP_008194285.1:p.Lys394_Lys396del	LOC100141738	100141738		100141738 [Gene Symbol: LOC100141738] [Locus Tag: TcasGA2_TC014639] [Chromosome: LG5] [Map Location: ] [Description: transmembrane protein 26] [Gene Type: protein-coding]	LOC100141738; TcasGA2_TC014639
776	NC_007420.3	13095112	SNV	T	C	Homozygous	21	22	95.45	1	5	16	0.24	38.67	21	23	12	14		1	1	no	C/C	No	1	59.29	XP_008194313.1:c.[121T>C]; XP_015836010.1:c.[73T>C]	XP_008194313.1:p.[Phe41Leu]; XP_015836010.1:p.[Phe25Leu]	LOC660991	660991		660991 [Gene Symbol: LOC660991] [Locus Tag: TcasGA2_TC014658] [Chromosome: LG5] [Map Location: ] [Description: insulin-like growth factor-binding protein complex acid labile subunit] [Gene Type: protein-coding]	LOC660991; TcasGA2_TC014658
777	NC_007420.3	13187574	SNV	T	A	Homozygous	20	20	100	1	10	14	0.42	36.8	24	24	11	13		1	1	no	A/A	No	1	81.69	XP_001814012.1:c.1414A>T	XP_001814012.1:p.Thr472Ser	LOC661929	661929		661929 [Gene Symbol: LOC661929] [Locus Tag: TcasGA2_TC013148] [Chromosome: LG5] [Map Location: ] [Description: PNR-like protein] [Gene Type: protein-coding]	PNR; LOC661929; NR2E6; TcasGA2_TC013148; NR2E3; PNR-like
778	NC_007420.3	13518822	SNV	A	T	Homozygous	21	21	100	1	14	11	0.44	37.05	25	25	12	14		1	1	no	T/T	No	1	84.71	XP_001814936.2:c.629A>T	XP_001814936.2:p.Tyr210Phe	LOC100141883	100141883		100141883 [Gene Symbol: LOC100141883] [Locus Tag: TcasGA2_TC014698] [Chromosome: LG5] [Map Location: ] [Description: multiple epidermal growth factor-like domains protein 8] [Gene Type: protein-coding]	TcasGA2_TC014698; LOC100141883
779	NC_007420.3	13553798	SNV	C	G	Homozygous	21	21	100	1	11	11	0.5	37.95	22	22	13	16		1	1	no	G/G	No	1	83.1	XP_974542.2:c.466C>G	XP_974542.2:p.Leu156Val	LOC663402	663402		663402 [Gene Symbol: LOC663402] [Locus Tag: TcasGA2_TC014700] [Chromosome: LG5] [Map Location: ] [Description: membrane metallo-endopeptidase-like 1] [Gene Type: protein-coding]	TcasGA2_TC014700; LOC663402
780	NC_007420.3	13641050	SNV	A	G	Homozygous	21	21	100	1	11	13	0.46	38.67	24	24	11	15		1	1	no	G/G	No	1	83.1	XP_008194357.1:c.1628T>C	XP_008194357.1:p.Met543Thr	LOC103313274	103313274		103313274 [Gene Symbol: LOC103313274] [Locus Tag: TcasGA2_TC013109] [Chromosome: LG5] [Map Location: ] [Description: putative ATP-dependent RNA helicase DHX33] [Gene Type: protein-coding]	LOC103313274; TcasGA2_TC013109
781	NC_007420.3	13781424	SNV	G	A	Homozygous	20	20	100	1	10	13	0.43	36.3	23	23	10	14		1	1	no	A/A	No	1	81.69	XP_008194370.1:c.113G>A	XP_008194370.1:p.Gly38Asp	LOC663690	663690		663690 [Gene Symbol: LOC663690] [Locus Tag: TcasGA2_TC033237] [Chromosome: LG5] [Map Location: ] [Description: hypothetical protein] [Gene Type: protein-coding]	LOC663690; TcasGA2_TC033237
782	NC_007420.3	13785311	SNV	C	A	Homozygous	22	22	100	1	17	5	0.23	39.18	22	22	13	16		1	1	no	A/A	No	1	87.7	XP_974830.1:c.346C>A	XP_974830.1:p.His116Asn	LOC663702	663702		663702 [Gene Symbol: LOC663702] [Locus Tag: TcasGA2_TC014714] [Chromosome: LG5] [Map Location: ] [Description: maf-like protein CLL_A0561] [Gene Type: protein-coding]	TcasGA2_TC014714; LOC663702
783	NC_007420.3	13810895	SNV	C	A	Homozygous	20	20	100	1	17	4	0.19	37.55	21	21	12	15		1	1	no	A/A	No	1	81.69	XP_008194372.1:c.1600C>A	XP_008194372.1:p.His534Asn	LOC103313276	103313276		103313276 [Gene Symbol: LOC103313276] [Locus Tag: TcasGA2_TC014717] [Chromosome: LG5] [Map Location: ] [Description: hypothetical protein] [Gene Type: protein-coding]	LOC103313276; TcasGA2_TC014717
784	NC_007420.3	13819016	SNV	G	C	Homozygous	23	23	100	1	19	6	0.24	39.3	25	25	12	18		1	1	no	C/C	No	1	89.14	XP_008194375.1:c.[2942C>G]; XP_008194385.1:c.[2504C>G]; XP_008194387.1:c.[2420C>G]; XP_015835915.1:c.[2897C>G]; XP_008194382.1:c.[2651C>G]; XP_008194383.1:c.[2856+165C>G]; XP_008194377.1:c.[2942C>G]; XP_008194376.1:c.[2942C>G]; XP_008194380.1:c.[2720C>G]; XP_008194378.1:c.[2750C>G]; XP_008194386.1:c.[2474C>G]; XP_008194379.1:c.[2942C>G]; XP_008194381.1:c.[2696C>G]; XP_015835916.1:c.[2606C>G]; XP_…	XP_008194375.1:p.[Thr981Ser]; XP_008194385.1:p.[Thr835Ser]; XP_008194387.1:p.[Thr807Ser]; XP_015835915.1:p.[Thr966Ser]; XP_008194382.1:p.[Thr884Ser]; XP_008194377.1:p.[Thr981Ser]; XP_008194376.1:p.[Thr981Ser]; XP_008194380.1:p.[Thr907Ser]; XP_008194378.1:p.[Thr917Ser]; XP_008194386.1:p.[Thr825Ser]; XP_008194379.1:p.[Thr981Ser]; XP_008194381.1:p.[Thr899Ser]; XP_015835916.1:p.[Thr869Ser]; XP_008194…	LOC663789	663789		663789 [Gene Symbol: LOC663789] [Locus Tag: TcasGA2_TC033238] [Chromosome: LG5] [Map Location: ] [Description: tensin] [Gene Type: protein-coding]	TcasGA2_TC033238; LOC663789
785	NC_007420.3	13907678	SNV	T	A	Homozygous	25	25	100	1	13	13	0.5	37.4	26	26	12	16		1	1	no	A/A	No	1	96.73	XP_015835918.1:c.[913A>T]; XP_008194390.1:c.[905-497A>T]; XP_008194388.1:c.[905-497A>T]; XP_008194391.1:c.[905-497A>T]; XP_008194389.1:c.[905-497A>T]; XP_974947.2:c.[905-497A>T]	XP_015835918.1:p.Thr305Ser	LOC663820	663820		663820 [Gene Symbol: LOC663820] [Locus Tag: TcasGA2_TC033240] [Chromosome: LG5] [Map Location: ] [Description: protein abrupt] [Gene Type: protein-coding]	LOC663820; TcasGA2_TC033240
786	NC_007420.3	14107299	SNV	C	T	Heterozygous	16	26	61.54	1	8	14	0.36	38.12	22	32	8	7	0.26	0.34	0.92	no	C/T	No	1	68.93	XP_015835641.1:c.1654G>A	XP_015835641.1:p.Val552Ile	LOC103313280	103313280		103313280 [Gene Symbol: LOC103313280] [Locus Tag: TcasGA2_TC033244] [Chromosome: LG5] [Map Location: LG5|LG5] [Description: uncharacterized LOC103313280] [Gene Type: protein-coding]	LOC103313280; TcasGA2_TC033244
787	NC_007420.3	14108284	SNV	T	C	Homozygous	20	20	100	1	15	5	0.25	37.35	20	20	14	16		1	1	no	C/C	No	1	80.12	XP_015835641.1:c.892A>G	XP_015835641.1:p.Ser298Gly	LOC103313280	103313280		103313280 [Gene Symbol: LOC103313280] [Locus Tag: TcasGA2_TC033244] [Chromosome: LG5] [Map Location: LG5|LG5] [Description: uncharacterized LOC103313280] [Gene Type: protein-coding]	LOC103313280; TcasGA2_TC033244
788	NC_007420.3	14130396	SNV	G	T	Homozygous	20	20	100	1	5	15	0.25	38.7	20	20	11	13		1	1	no	T/T	No	1	81.69	XP_975053.1:c.694G>T	XP_975053.1:p.Val232Leu	LOC663932	663932		663932 [Gene Symbol: LOC663932] [Locus Tag: TcasGA2_TC014727] [Chromosome: LG5] [Map Location: ] [Description: venom dipeptidyl peptidase 4] [Gene Type: protein-coding]	TcasGA2_TC014727; LOC663932
789	NC_007420.3	14130784	SNV	G	A	Homozygous	21	23	91.3	1	9	12	0.43	39.1	21	24	11	12		1	1	no	A/A	No	1	27.26	XP_975053.1:c.1082G>A	XP_975053.1:p.Gly361Glu	LOC663932	663932		663932 [Gene Symbol: LOC663932] [Locus Tag: TcasGA2_TC014727] [Chromosome: LG5] [Map Location: ] [Description: venom dipeptidyl peptidase 4] [Gene Type: protein-coding]	TcasGA2_TC014727; LOC663932
790	NC_007420.3	14260070	SNV	A	G	Homozygous	21	24	87.5	0.97	14	12	0.46	37.05	26	29	14	17		0.92	1	no	G/G	No	1	15.78	XP_975187.1:c.589T>C	XP_975187.1:p.Ser197Pro	LOC664077	664077		664077 [Gene Symbol: LOC664077] [Locus Tag: ] [Chromosome: LG5] [Map Location: ] [Description: transcription factor HES-1-like] [Gene Type: protein-coding]	LOC664077
791	NC_007420.3	14286030	SNV	C	G	Homozygous	22	22	100	1	15	7	0.32	37.45	22	22	16	13		1	1	no	G/G	No	1	86.1	XP_015835750.1:c.[2529C>G]; XP_008194424.1:c.[2064+1000C>G]; XP_015835749.1:c.[2574C>G]; XP_008194423.1:c.[2097+1000C>G]; XP_008194420.1:c.[2109+1000C>G]	XP_015835750.1:p.[His843Gln]; XP_015835749.1:p.[His858Gln]	LOC664095	664095		664095 [Gene Symbol: LOC664095] [Locus Tag: ] [Chromosome: LG5] [Map Location: ] [Description: tyrosine-protein kinase PR2] [Gene Type: protein-coding]	LOC664095
792	NC_007420.3	14296560	SNV	T	A	Homozygous	25	25	100	1	18	7	0.28	37.28	25	25	12	21		1	1	no	A/A	No	1	96.74	XP_975229.1:c.779A>T	XP_975229.1:p.His260Leu	LOC664121	664121		664121 [Gene Symbol: LOC664121] [Locus Tag: TcasGA2_TC013076] [Chromosome: LG5] [Map Location: ] [Description: origin recognition complex subunit 3] [Gene Type: protein-coding]	LOC664121; TcasGA2_TC013076
793	NC_007420.3	14660961	SNV	A	T	Heterozygous	7	28	25	1	5	4	0.44	38.29	9	33	5	6	1.51	0.34	1	no	A/T	No	1	26.76	XP_008194045.1:c.1882T>A	XP_008194045.1:p.Ser628Thr	LOC655279	655279		655279 [Gene Symbol: LOC655279] [Locus Tag: TcasGA2_TC013060] [Chromosome: LG5] [Map Location: ] [Description: kinesin 6A] [Gene Type: protein-coding]	TcasGA2_TC013060; kinesin-6A; LOC655279
794	NC_007420.3	14831815	SNV	C	A	Homozygous	22	22	100	1	10	15	0.4	38.09	25	25	9	12		1	1	no	A/A	No	1	87.7	XP_015836119.1:c.[1704C>A]; XP_008194079.1:c.[1704C>A]; XP_015836117.1:c.[1701C>A]; XP_008194080.1:c.[1698C>A]	XP_015836119.1:p.[Asp568Glu]; XP_008194079.1:p.[Asp568Glu]; XP_015836117.1:p.[Asp567Glu]; XP_008194080.1:p.[Asp566Glu]	LOC657573	657573		657573 [Gene Symbol: LOC657573] [Locus Tag: TcasGA2_TC014768] [Chromosome: LG5] [Map Location: ] [Description: uncharacterized LOC657573] [Gene Type: protein-coding]	LOC657573; TcasGA2_TC014768
795	NC_007420.3	14837072	SNV	A	G	Heterozygous	12	22	54.55	1	2	10	0.17	38.17	12	22	8	8	-0.92	0.83	0.49	no	A/G	No	1	78.87	XP_008194079.1:c.[6281A>G]; XP_015836119.1:c.[6281A>G]; XP_015836117.1:c.[6278A>G]; XP_008194080.1:c.[6275A>G]	XP_008194079.1:p.[Lys2094Arg]; XP_015836119.1:p.[Lys2094Arg]; XP_015836117.1:p.[Lys2093Arg]; XP_008194080.1:p.[Lys2092Arg]	LOC657573	657573		657573 [Gene Symbol: LOC657573] [Locus Tag: TcasGA2_TC014768] [Chromosome: LG5] [Map Location: ] [Description: uncharacterized LOC657573] [Gene Type: protein-coding]	LOC657573; TcasGA2_TC014768
796	NC_007420.3	15143139	SNV	G	C	Homozygous	27	27	100	1	11	22	0.33	36.93	33	33	10	13		1	1	no	C/C	No	1	101.17	XP_008194133.1:c.[2737G>C]; XP_008194131.1:c.[2752G>C]; XP_015835668.1:c.[2737G>C]; XP_008194135.1:c.[2722G>C]; XP_008194132.1:c.[2752G>C]	XP_008194133.1:p.[Glu913Gln]; XP_008194131.1:p.[Glu918Gln]; XP_015835668.1:p.[Glu913Gln]; XP_008194135.1:p.[Glu908Gln]; XP_008194132.1:p.[Glu918Gln]	LOC100142267	100142267		100142267 [Gene Symbol: LOC100142267] [Locus Tag: TcasGA2_TC014794] [Chromosome: LG5] [Map Location: ] [Description: probable phosphorylase b kinase regulatory subunit beta] [Gene Type: protein-coding]	LOC100142267; TcasGA2_TC014794
797	NC_007421.3	540720	SNV	C	G	Heterozygous	14	20	70	1	11	7	0.39	38	18	28	9	12	1.15	0.93	1	no	C/G	No	1	33.2	XP_015836205.1:c.[931C>G]; XP_008194491.1:c.[931C>G]; XP_008194493.1:c.[856C>G]	XP_015836205.1:p.[Pro311Ala]; XP_008194491.1:p.[Pro311Ala]; XP_008194493.1:p.[Pro286Ala]	LOC103313306	103313306		103313306 [Gene Symbol: LOC103313306] [Locus Tag: TcasGA2_TC015411] [Chromosome: LG6] [Map Location: ] [Description: zinc finger protein 182] [Gene Type: protein-coding]	TcasGA2_TC015411; LOC103313306
798	NC_007421.3	572135	SNV	A	T	Homozygous	21	21	100	1	13	9	0.41	38.29	22	22	10	14		1	1	no	T/T	No	1	84.7	XP_001814047.1:c.927T>A	XP_001814047.1:p.Asp309Glu	LOC660395	660395		660395 [Gene Symbol: LOC660395] [Locus Tag: TcasGA2_TC015316] [Chromosome: LG6] [Map Location: ] [Description: bleomycin hydrolase] [Gene Type: protein-coding]	TcasGA2_TC015316; LOC660395
799	NC_007421.3	605475	SNV	T	C	Heterozygous	18	26	69.23	1	6	14	0.3	39.44	20	28	8	10	0.89	0.97	0.99	no	C/T	No	1	42.19	XP_001814158.1:c.529A>G	XP_001814158.1:p.Thr177Ala	LOC100142136	100142136		100142136 [Gene Symbol: LOC100142136] [Locus Tag: TcasGA2_TC015313] [Chromosome: LG6] [Map Location: ] [Description: uncharacterized LOC100142136] [Gene Type: protein-coding]	LOC100142136; TcasGA2_TC015313
800	NC_007421.3	661058	SNV	A	G	Homozygous	23	23	100	1	13	14	0.48	37.26	27	27	12	16		1	1	no	G/G	No	1	89.12	XP_008194510.1:c.[200T>C]; XP_008194509.1:c.[200T>C]	XP_008194510.1:p.[Leu67Pro]; XP_008194509.1:p.[Leu67Pro]	LOC661263	661263		661263 [Gene Symbol: LOC661263] [Locus Tag: TcasGA2_TC015308] [Chromosome: LG6] [Map Location: ] [Description: codanin-1] [Gene Type: protein-coding]	LOC661263; TcasGA2_TC015308
801	NC_007421.3	733655	SNV	C	T	Heterozygous	9	23	39.13	1	5	4	0.44	38.33	9	24	8	8	0.16	1	1	no	C/T	No	1	63.24	XP_001814494.2:c.386C>T	XP_001814494.2:p.Ala129Val	LOC100141658	100141658		100141658 [Gene Symbol: LOC100141658] [Locus Tag: TcasGA2_TC015423] [Chromosome: LG6] [Map Location: ] [Description: probable multidrug resistance-associated protein lethal(2)03659] [Gene Type: protein-coding]	LOC100141658; TcasGA2_TC015423
802	NC_007421.3	763167	SNV	C	T	Homozygous	22	22	100	1	14	12	0.46	38.86	26	26	13	19		1	1	no	T/T	No	1	87.71	XP_008194515.1:c.107C>T	XP_008194515.1:p.Pro36Leu	Gr80	100142419		100142419 [Gene Symbol: Gr80] [Locus Tag: TcasGA2_TC030166] [Chromosome: LG6] [Map Location: ] [Description: gustatory receptor] [Gene Type: protein-coding]	TcGr70; Gr80; TcasGA2_TC030166
803	NC_007421.3	817252	SNV	A	G	Heterozygous	16	20	80	0.87	4	13	0.24	36.94	17	21	10	11	1.65	0.86	0.99	no	A/G	No	1	8.88	XP_015836191.1:c.995T>C	XP_015836191.1:p.Ile332Thr	LOC661974	661974		661974 [Gene Symbol: LOC661974] [Locus Tag: TcasGA2_TC015295] [Chromosome: LG6] [Map Location: ] [Description: uncharacterized LOC661974] [Gene Type: protein-coding]	TcasGA2_TC015295; P157; LOC661974
804	NC_007421.3	937728	SNV	A	G	Homozygous	20	20	100	1	9	14	0.39	37.85	23	23	13	13		1	1	no	G/G	No	1	80.09	XP_015836194.1:c.4372T>C	XP_015836194.1:p.Ser1458Pro	LOC662547	662547		662547 [Gene Symbol: LOC662547] [Locus Tag: TcasGA2_TC015284] [Chromosome: LG6] [Map Location: ] [Description: uncharacterized LOC662547] [Gene Type: protein-coding]	LOC662547; TcasGA2_TC015284
805	NC_007421.3	989913..989914	MNV	TG	CT	Homozygous	21	24	87.5	1	12	16	0.43	35.57	28	32	12	17		1	1	no	CT/CT	No	1	200	XP_015836260.1:c.3780_3781delCAinsAG	XP_015836260.1:p.Thr1261Ala	LOC103313333	103313333		103313333 [Gene Symbol: LOC103313333] [Locus Tag: ] [Chromosome: LG6] [Map Location: ] [Description: unconventional myosin-XVIIIa] [Gene Type: protein-coding]	LOC103313333
806	NC_007421.3	989925	SNV	C	A	Homozygous	21	24	87.5	0.97	10	17	0.37	34.86	27	31	10	13		0.96	1	no	A/A	No	1	15.42	XP_015836260.1:c.3769G>T	XP_015836260.1:p.Ala1257Ser	LOC103313333	103313333		103313333 [Gene Symbol: LOC103313333] [Locus Tag: ] [Chromosome: LG6] [Map Location: ] [Description: unconventional myosin-XVIIIa] [Gene Type: protein-coding]	LOC103313333
807	NC_007421.3	1562885..1562886	MNV	TA	CG	Homozygous	30	30	100	1	27	4	0.13	37.03	31	31	14	26		1	1	no	CG/CG	No	1	200	XP_015836386.1:c.276_277delTAinsCG	XP_015836386.1:p.Ile93Val	LOC662580	662580		662580 [Gene Symbol: LOC662580] [Locus Tag: TcasGA2_TC015501] [Chromosome: LG6] [Map Location: ] [Description: sugar transporter 3] [Gene Type: protein-coding]	LOC662580; TcasGA2_TC015501; st3
808	NC_007421.3	2057303	SNV	C	G	Homozygous	23	23	100	1	7	16	0.3	36.26	23	23	11	14		1	1	no	G/G	No	1	89.12	XP_967750.1:c.[1171G>C]; XP_008201637.1:c.[607G>C]	XP_967750.1:p.[Val391Leu]; XP_008201637.1:p.[Val203Leu]	LOC656106	656106		656106 [Gene Symbol: LOC656106] [Locus Tag: TcasGA2_TC015173] [Chromosome: LG6] [Map Location: ] [Description: ubiquitin carboxyl-terminal hydrolase 2] [Gene Type: protein-coding]	LOC656106; TcasGA2_TC015173
809	NC_007421.3	2074706	SNV	A	T	Homozygous	20	20	100	1	8	15	0.35	36.45	23	23	13	15		1	1	no	T/T	No	1	81.7	XP_008201663.1:c.[1303T>A]; XP_968140.1:c.[825+1005A>T]	XP_008201663.1:p.Leu435Ile	LOC656521, LOC103315247	656521 , 103315247		656521 [Gene Symbol: LOC656521] [Locus Tag: TcasGA2_TC015540] [Chromosome: LG6] [Map Location: ] [Description: phosphoglycerate kinase] [Gene Type: protein-coding] || 103315247 [Gene Symbol: LOC103315247] [Locus Tag: TcasGA2_TC015169] [Chromosome: LG6] [Map Location: ] [Description: hypothetical protein] [Gene Type: protein-coding]	LOC656521; TcasGA2_TC015540 || TcasGA2_TC015169; LOC103315247
810	NC_007421.3	2180179..2180181	Deletion	GGC	-	Heterozygous	9	21	42.86	1	4	5	0.44	35.44	9	21	5	7	-1.96	0.1	1	no	complex	No	1	200	XP_008190371.1:c.[268_270delGGC]; XP_969409.1:c.[256_258delGGC]	XP_008190371.1:p.[Gly96del]; XP_969409.1:p.[Gly92del]	LOC657888	657888		657888 [Gene Symbol: LOC657888] [Locus Tag: TcasGA2_TC015549] [Chromosome: LG6] [Map Location: ] [Description: glycine-rich cell wall structural protein] [Gene Type: protein-coding]	TcasGA2_TC015549; LOC657888
811	NC_007421.3	2239006	SNV	C	T	Homozygous	21	21	100	1	15	10	0.4	36.81	25	25	9	16		1	1	no	T/T	No	1	84.71	XP_976295.1:c.85G>A	XP_976295.1:p.Gly29Ser	LOC658802	658802		658802 [Gene Symbol: LOC658802] [Locus Tag: TcasGA2_TC015156] [Chromosome: LG6] [Map Location: ] [Description: uncharacterized LOC658802] [Gene Type: protein-coding]	LOC658802; TcasGA2_TC015156
812	NC_007421.3	2309032	SNV	C	T	Homozygous	20	20	100	1	13	8	0.38	37.7	21	21	10	15		1	1	no	T/T	No	1	81.7	XP_970667.1:c.374C>T	XP_970667.1:p.Ser125Phe	LOC659249	659249		659249 [Gene Symbol: LOC659249] [Locus Tag: TcasGA2_TC015559] [Chromosome: LG6] [Map Location: ] [Description: uncharacterized LOC659249] [Gene Type: protein-coding]	LOC659249; TcasGA2_TC015559
813	NC_007421.3	2426062	SNV	T	C	Homozygous	24	24	100	1	15	17	0.47	36.67	32	32	16	16		1	1	no	C/C	No	1	92.15	XP_008190580.2:c.440T>C	XP_008190580.2:p.Val147Ala	LOC660300	660300		660300 [Gene Symbol: LOC660300] [Locus Tag: TcasGA2_TC015566] [Chromosome: LG6] [Map Location: ] [Description: venom acid phosphatase Acph-1] [Gene Type: protein-coding]	TcasGA2_TC015566; LOC660300
814	NC_007421.3	2430778..2430780	MNV	GAT	TGC	Homozygous	22	22	100	1	6	20	0.23	35.73	26	26	13	17		1	1	no	TGC/TGC	No	1	200	XP_008190573.1:c.351_353delATCinsGCA	XP_008190573.1:p.Ser118Gln	LOC103312220	103312220		103312220 [Gene Symbol: LOC103312220] [Locus Tag: TcasGA2_TC015142] [Chromosome: LG6] [Map Location: ] [Description: nicastrin] [Gene Type: protein-coding]	LOC103312220; TcasGA2_TC015142
815	NC_007421.3	2451777	SNV	A	G	Homozygous	30	30	100	1	22	10	0.31	38.93	32	32	9	19		1	1	no	G/G	No	1	110.19	XP_008190620.1:c.[3503T>C]; XP_008190626.1:c.[3461T>C]	XP_008190620.1:p.[Val1168Ala]; XP_008190626.1:p.[Val1154Ala]	LOC661054, LOC660604	661054 , 660604		661054 [Gene Symbol: LOC661054] [Locus Tag: TcasGA2_TC015569] [Chromosome: LG6] [Map Location: ] [Description: inter-alpha-trypsin inhibitor heavy chain H4] [Gene Type: protein-coding] || 660604 [Gene Symbol: LOC660604] [Locus Tag: TcasGA2_TC015138] [Chromosome: LG6] [Map Location: ] [Description: A disintegrin and metalloproteinase with thrombospondin motifs 9] [Gene Type: protein-coding]	LOC661054; TcasGA2_TC015569 || LOC660604; TcasGA2_TC015138; ADAMTS9
816	NC_007421.3	2451846	SNV	C	A	Heterozygous	6	23	26.09	0.99	0	6	0	41	6	25	1	1	3.1	0.04	0.36	no	A/C	No	1	22.61	XP_008190626.1:c.[3392G>T]; XP_008190620.1:c.[3434G>T]	XP_008190626.1:p.[Cys1131Phe]; XP_008190620.1:p.[Cys1145Phe]	LOC661054, LOC660604	661054 , 660604		661054 [Gene Symbol: LOC661054] [Locus Tag: TcasGA2_TC015569] [Chromosome: LG6] [Map Location: ] [Description: inter-alpha-trypsin inhibitor heavy chain H4] [Gene Type: protein-coding] || 660604 [Gene Symbol: LOC660604] [Locus Tag: TcasGA2_TC015138] [Chromosome: LG6] [Map Location: ] [Description: A disintegrin and metalloproteinase with thrombospondin motifs 9] [Gene Type: protein-coding]	LOC661054; TcasGA2_TC015569 || LOC660604; TcasGA2_TC015138; ADAMTS9
817	NC_007421.3	2516458	SNV	A	C	Homozygous	20	20	100	1	16	6	0.27	36.7	22	22	12	15		1	1	no	C/C	No	1	80.12	XP_015836282.1:c.1371A>C	XP_015836282.1:p.Glu457Asp	LOC661265	661265		661265 [Gene Symbol: LOC661265] [Locus Tag: TcasGA2_TC015117] [Chromosome: LG6] [Map Location: ] [Description: activating signal cointegrator 1 complex subunit 3] [Gene Type: protein-coding]	LOC661265; TcasGA2_TC015117
818	NC_007421.3	2694948	SNV	C	A	Homozygous	21	21	100	1	8	17	0.32	37.71	25	25	10	13		1	1	no	A/A	No	1	84.7	XP_973367.1:c.9G>T	XP_973367.1:p.Glu3Asp	LOC662157	662157		662157 [Gene Symbol: LOC662157] [Locus Tag: TcasGA2_TC015585] [Chromosome: LG6] [Map Location: ] [Description: bifunctional transcriptional activator/DNA repair enzyme Ada] [Gene Type: protein-coding]	TcasGA2_TC015585; LOC662157
819	NC_007421.3	2694952	SNV	C	G	Homozygous	22	22	100	1	8	18	0.31	36.77	26	26	10	14		1	1	no	G/G	No	1	86.11	XP_973367.1:c.5G>C	XP_973367.1:p.Gly2Ala	LOC662157	662157		662157 [Gene Symbol: LOC662157] [Locus Tag: TcasGA2_TC015585] [Chromosome: LG6] [Map Location: ] [Description: bifunctional transcriptional activator/DNA repair enzyme Ada] [Gene Type: protein-coding]	TcasGA2_TC015585; LOC662157
820	NC_007421.3	2706529	SNV	C	T	Homozygous	24	24	100	1	12	14	0.46	34.79	26	26	12	16		1	1	no	T/T	No	1	93.73	XP_973265.1:c.541G>A	XP_973265.1:p.Ala181Thr	LOC662049	662049		662049 [Gene Symbol: LOC662049] [Locus Tag: TcasGA2_TC015584] [Chromosome: LG6] [Map Location: ] [Description: ribosome biogenesis protein BOP1 homolog] [Gene Type: protein-coding]	LOC662049; TcasGA2_TC015584
821	NC_007421.3	2783894	SNV	C	A	Homozygous	26	26	100	1	12	16	0.43	38.15	28	28	13	19		1	1	no	A/A	No	1	99.74	XP_008194698.1:c.3123C>A	XP_008194698.1:p.Asp1041Glu	LOC662012, LOC661726	662012 , 661726		662012 [Gene Symbol: LOC662012] [Locus Tag: TcasGA2_TC015581] [Chromosome: LG6] [Map Location: ] [Description: protein neuralized] [Gene Type: protein-coding] || 661726 [Gene Symbol: LOC661726] [Locus Tag: TcasGA2_TC033390] [Chromosome: LG6] [Map Location: ] [Description: multidrug resistance-associated protein 4-like] [Gene Type: protein-coding]	TcasGA2_TC015581; LOC662012 || TcasGA2_TC033390; LOC661726
822	NC_007421.3	3413107..3413109	Deletion	CAA	-	Homozygous	20	20	100	1	11	13	0.46	36.4	24	24	11	17		1	1	no	-/-	No	1	200	XP_015836326.1:c.[2542_2544delCAA]; XP_015836325.1:c.[2545_2547delCAA]; XP_015836327.1:c.[2515_2517delCAA]; XP_008194733.1:c.[2491_2493delCAA]; XP_008194735.1:c.[2275_2277delCAA]	XP_015836326.1:p.[Gln855del]; XP_015836325.1:p.[Gln856del]; XP_015836327.1:p.[Gln846del]; XP_008194733.1:p.[Gln838del]; XP_008194735.1:p.[Gln766del]	LOC658049	658049		658049 [Gene Symbol: LOC658049] [Locus Tag: TcasGA2_TC015608] [Chromosome: LG6] [Map Location: ] [Description: eukaryotic translation initiation factor 4E transporter] [Gene Type: protein-coding]	Eif4enif1; LOC658049; TcasGA2_TC015608
823	NC_007421.3	3419450	SNV	A	C	Homozygous	20	20	100	1	16	7	0.3	38.2	23	23	11	13		1	1	no	C/C	No	1	80.11	XP_008194736.1:c.[840A>C]; XP_008194737.1:c.[840A>C]; XP_008194738.1:c.[840A>C]	XP_008194736.1:p.[Lys280Asn]; XP_008194737.1:p.[Lys280Asn]; XP_008194738.1:p.[Lys280Asn]	LOC100142308	100142308		100142308 [Gene Symbol: LOC100142308] [Locus Tag: TcasGA2_TC015609] [Chromosome: LG6] [Map Location: ] [Description: uncharacterized LOC100142308] [Gene Type: protein-coding]	TcasGA2_TC015609; LOC100142308
824	NC_007421.3	3419500	SNV	A	C	Homozygous	26	26	100	1	13	16	0.45	37.04	29	29	14	16		1	1	no	C/C	No	1	98.17	XP_008194737.1:c.[890A>C]; XP_008194736.1:c.[890A>C]; XP_008194738.1:c.[890A>C]	XP_008194737.1:p.[Glu297Ala]; XP_008194736.1:p.[Glu297Ala]; XP_008194738.1:p.[Glu297Ala]	LOC100142308	100142308		100142308 [Gene Symbol: LOC100142308] [Locus Tag: TcasGA2_TC015609] [Chromosome: LG6] [Map Location: ] [Description: uncharacterized LOC100142308] [Gene Type: protein-coding]	TcasGA2_TC015609; LOC100142308
825	NC_007421.3	3445858	SNV	T	G	Homozygous	23	23	100	1	18	14	0.44	38.87	32	32	13	17		1	1	no	G/G	No	1	89.12	XP_969783.1:c.882A>C	XP_969783.1:p.Lys294Asn	LOC658288	658288		658288 [Gene Symbol: LOC658288] [Locus Tag: TcasGA2_TC015093] [Chromosome: LG6] [Map Location: ] [Description: rad50] [Gene Type: protein-coding]	LOC658288; TcasGA2_TC015093; rad50
826	NC_007421.3	3445883	SNV	A	G	Homozygous	20	20	100	1	11	13	0.46	39.15	24	24	12	16		1	1	no	G/G	No	1	80.09	XP_969783.1:c.857T>C	XP_969783.1:p.Val286Ala	LOC658288	658288		658288 [Gene Symbol: LOC658288] [Locus Tag: TcasGA2_TC015093] [Chromosome: LG6] [Map Location: ] [Description: rad50] [Gene Type: protein-coding]	LOC658288; TcasGA2_TC015093; rad50
827	NC_007421.3	3526416	SNV	A	T	Homozygous	20	20	100	1	11	10	0.48	39.1	21	21	13	14		1	1	no	T/T	No	1	81.69	NP_001161903.1:c.605A>T	NP_001161903.1:p.Tyr202Phe	Pmp1-b	659324	peritrophic matrix protein 1-B	659324 [Gene Symbol: Pmp1-b] [Locus Tag: TcasGA2_TC015620] [Chromosome: LG6] [Map Location: ] [Description: peritrophic matrix protein 1-B] [Gene Type: protein-coding]	TcasGA2_TC015620; Pmp1-b
828	NC_007421.3	3587342	SNV	T	C	Homozygous	20	20	100	1	18	4	0.18	35.75	22	22	10	12		1	1	no	C/C	No	1	80.12	XP_970918.1:c.2381A>G	XP_970918.1:p.Glu794Gly	LOC659526	659526		659526 [Gene Symbol: LOC659526] [Locus Tag: TcasGA2_TC015082] [Chromosome: LG6] [Map Location: ] [Description: DNA-directed RNA polymerase I subunit RPA1] [Gene Type: protein-coding]	LOC659526; TcasGA2_TC015082
829	NC_007421.3	3587793	SNV	A	G	Homozygous	23	23	100	1	4	20	0.17	38.26	24	24	10	13		1	1	no	G/G	No	1	89.12	XP_970918.1:c.1987T>C	XP_970918.1:p.Cys663Arg	LOC659526	659526		659526 [Gene Symbol: LOC659526] [Locus Tag: TcasGA2_TC015082] [Chromosome: LG6] [Map Location: ] [Description: DNA-directed RNA polymerase I subunit RPA1] [Gene Type: protein-coding]	LOC659526; TcasGA2_TC015082
830	NC_007421.3	3587802	SNV	T	G	Homozygous	24	24	100	1	4	20	0.17	38.12	24	24	10	13		1	1	no	G/G	No	1	92.13	XP_970918.1:c.1978A>C	XP_970918.1:p.Ile660Leu	LOC659526	659526		659526 [Gene Symbol: LOC659526] [Locus Tag: TcasGA2_TC015082] [Chromosome: LG6] [Map Location: ] [Description: DNA-directed RNA polymerase I subunit RPA1] [Gene Type: protein-coding]	LOC659526; TcasGA2_TC015082
831	NC_007421.3	3814103	SNV	C	A	Homozygous	33	33	100	1	24	13	0.35	36.3	37	37	13	21		1	1	no	A/A	No	1	120.81	XP_015836420.1:c.[8204C>A]; XP_015836423.1:c.[7982C>A]; XP_015836419.1:c.[8255C>A]; XP_015836422.1:c.[8126C>A]; XP_015836421.1:c.[8195C>A]; XP_015836424.1:c.[7973C>A]	XP_015836420.1:p.[Thr2735Asn]; XP_015836423.1:p.[Thr2661Asn]; XP_015836419.1:p.[Thr2752Asn]; XP_015836422.1:p.[Thr2709Asn]; XP_015836421.1:p.[Thr2732Asn]; XP_015836424.1:p.[Thr2658Asn]	LOC660883	660883		660883 [Gene Symbol: LOC660883] [Locus Tag: TcasGA2_TC015636] [Chromosome: LG6] [Map Location: ] [Description: uncharacterized protein KIAA1109] [Gene Type: protein-coding]	LOC660883; TcasGA2_TC015636
832	NC_007421.3	4230786	SNV	C	A	Heterozygous	5	21	23.81	0.96	1	4	0.2	39.2	5	21	3	4	2.11	0.27	0.33	no	A/C	No	1	14.46	XP_973569.2:c.1589G>T	XP_973569.2:p.Cys530Phe	LOC662377	662377		662377 [Gene Symbol: LOC662377] [Locus Tag: TcasGA2_TC015049] [Chromosome: LG6] [Map Location: ] [Description: probable ATP-dependent RNA helicase DHX34] [Gene Type: protein-coding]	LOC662377; TcasGA2_TC015049
833	NC_007421.3	4230792	SNV	A	G	Homozygous	20	20	100	1	13	7	0.35	37.3	20	20	12	14		1	1	no	G/G	No	1	80.09	XP_973569.2:c.1583T>C	XP_973569.2:p.Ile528Thr	LOC662377	662377		662377 [Gene Symbol: LOC662377] [Locus Tag: TcasGA2_TC015049] [Chromosome: LG6] [Map Location: ] [Description: probable ATP-dependent RNA helicase DHX34] [Gene Type: protein-coding]	LOC662377; TcasGA2_TC015049
834	NC_007421.3	4271679	SNV	T	C	Homozygous	27	30	90	1	15	16	0.48	37.52	31	34	13	19		0.98	1	no	C/C	No	1	32.74	XP_001813376.1:c.307A>G	XP_001813376.1:p.Lys103Glu	LOC100142306	100142306		100142306 [Gene Symbol: LOC100142306] [Locus Tag: TcasGA2_TC015041] [Chromosome: LG6] [Map Location: ] [Description: odorant binding protein 3] [Gene Type: protein-coding]	TcasGA2_TC015041; OBP03; TcOBP6F; LOC100142306
835	NC_007421.3	4523376	SNV	C	G	Heterozygous	16	24	66.67	1	14	4	0.22	36.94	18	26	9	13	-1.07	0.48	0.83	no	C/G	No	1	47.74	XP_008194862.1:c.2500C>G	XP_008194862.1:p.Arg834Gly	LOC663368	663368		663368 [Gene Symbol: LOC663368] [Locus Tag: TcasGA2_TC015667] [Chromosome: LG6] [Map Location: ] [Description: tyrosine-protein kinase transmembrane receptor Ror] [Gene Type: protein-coding]	LOC663368; TcasGA2_TC015667
836	NC_007421.3	4556645	SNV	C	T	Heterozygous	6	20	30	1	3	3	0.5	39.17	6	22	2	3	0.25	0.72	0.53	no	C/T	No	1	33.5	XP_008192908.1:c.19G>A	XP_008192908.1:p.Val7Met	LOC103312884	103312884		103312884 [Gene Symbol: LOC103312884] [Locus Tag: ] [Chromosome: LG6] [Map Location: ] [Description: putative uncharacterized protein DDB_G0287191] [Gene Type: protein-coding]	LOC103312884
837	NC_007421.3	4556647	SNV	G	C	Heterozygous	6	20	30	1	3	3	0.5	40	6	22	2	3	1.48	0.72	0.53	no	C/G	No	1	33.33	XP_008192908.1:c.17C>G	XP_008192908.1:p.Ser6Cys	LOC103312884	103312884		103312884 [Gene Symbol: LOC103312884] [Locus Tag: ] [Chromosome: LG6] [Map Location: ] [Description: putative uncharacterized protein DDB_G0287191] [Gene Type: protein-coding]	LOC103312884
838	NC_007421.3	4990571	SNV	G	A	Homozygous	18	21	85.71	0.82	14	5	0.26	38.11	19	24	12	14		0.85	0.97	no	A/A	No	1	7.4	XP_015836465.1:c.1952G>A	XP_015836465.1:p.Arg651Gln	LOC657193, LOC656607	657193 , 656607		657193 [Gene Symbol: LOC657193] [Locus Tag: TcasGA2_TC015684] [Chromosome: LG6] [Map Location: ] [Description: bicaudal D-related protein homolog] [Gene Type: protein-coding] || 656607 [Gene Symbol: LOC656607] [Locus Tag: TcasGA2_TC015006] [Chromosome: LG6] [Map Location: LG6|LG6] [Description: centromere-associated protein E] [Gene Type: protein-coding]	LOC657193; TcasGA2_TC015684 || TcasGA2_TC015006; LOC656607
839	NC_007421.3	4992182	SNV	A	C	Heterozygous	11	30	36.67	1	0	11	0	39.55	11	35	6	6	1.89	0.6	0.43	no	A/C	No	1	70.22	XP_015836482.1:c.[33A>C]; XP_015836465.1:c.[2655A>C]	XP_015836482.1:p.[Lys11Asn]; XP_015836465.1:p.[Lys885Asn]	LOC657193, LOC656607, LOC107398091	657193 , 656607 , 107398091		657193 [Gene Symbol: LOC657193] [Locus Tag: TcasGA2_TC015684] [Chromosome: LG6] [Map Location: ] [Description: bicaudal D-related protein homolog] [Gene Type: protein-coding] || 656607 [Gene Symbol: LOC656607] [Locus Tag: TcasGA2_TC015006] [Chromosome: LG6] [Map Location: LG6|LG6] [Description: centromere-associated protein E] [Gene Type: protein-coding] || 107398091 [Gene Symbol: LOC107398091] […	LOC657193; TcasGA2_TC015684 || TcasGA2_TC015006; LOC656607 || LOC107398091
840	NC_007421.3	4992634..4992635	MNV	AC	GT	Heterozygous	11	25	44	1	6	5	0.45	39.27	11	28	6	10	0.42	0.99	1	no	complex	No	1	200	XP_015836465.1:c.[3107_3108delACinsGT]; XP_015836482.1:c.[485_486delACinsGT]	XP_015836465.1:p.[His1036Arg]; XP_015836482.1:p.[His162Arg]	LOC657193, LOC656607, LOC107398091	657193 , 656607 , 107398091		657193 [Gene Symbol: LOC657193] [Locus Tag: TcasGA2_TC015684] [Chromosome: LG6] [Map Location: ] [Description: bicaudal D-related protein homolog] [Gene Type: protein-coding] || 656607 [Gene Symbol: LOC656607] [Locus Tag: TcasGA2_TC015006] [Chromosome: LG6] [Map Location: LG6|LG6] [Description: centromere-associated protein E] [Gene Type: protein-coding] || 107398091 [Gene Symbol: LOC107398091] […	LOC657193; TcasGA2_TC015684 || TcasGA2_TC015006; LOC656607 || LOC107398091
841	NC_007421.3	4993101	SNV	G	T	Heterozygous	12	40	30	1	9	8	0.47	38.75	17	54	8	8	-0.63	0.46	0.98	no	G/T	No	1	50.87	XP_015836465.1:c.[3426+53G>T]; XP_015836482.1:c.[857G>T]	XP_015836482.1:p.Cys286Phe	LOC657193, LOC656607, LOC107398091	657193 , 656607 , 107398091		657193 [Gene Symbol: LOC657193] [Locus Tag: TcasGA2_TC015684] [Chromosome: LG6] [Map Location: ] [Description: bicaudal D-related protein homolog] [Gene Type: protein-coding] || 656607 [Gene Symbol: LOC656607] [Locus Tag: TcasGA2_TC015006] [Chromosome: LG6] [Map Location: LG6|LG6] [Description: centromere-associated protein E] [Gene Type: protein-coding] || 107398091 [Gene Symbol: LOC107398091] […	LOC657193; TcasGA2_TC015684 || TcasGA2_TC015006; LOC656607 || LOC107398091
842	NC_007421.3	4993334	SNV	G	A	Heterozygous	11	26	42.31	1	2	9	0.18	37.64	11	27	7	9	-1.66	0.83	0.78	no	A/G	No	1	80.5	XP_008194877.1:c.[1580C>T]; XP_015836465.1:c.[3426+286G>A]	XP_008194877.1:p.Thr527Ile	LOC657193, LOC656607, LOC656860	657193 , 656607 , 656860		657193 [Gene Symbol: LOC657193] [Locus Tag: TcasGA2_TC015684] [Chromosome: LG6] [Map Location: ] [Description: bicaudal D-related protein homolog] [Gene Type: protein-coding] || 656607 [Gene Symbol: LOC656607] [Locus Tag: TcasGA2_TC015006] [Chromosome: LG6] [Map Location: LG6|LG6] [Description: centromere-associated protein E] [Gene Type: protein-coding] || 656860 [Gene Symbol: LOC656860] [Locus …	LOC657193; TcasGA2_TC015684 || TcasGA2_TC015006; LOC656607 || LOC656860; TcasGA2_TC015681
843	NC_007421.3	4993361	SNV	T	A	Heterozygous	11	25	44	1	2	10	0.17	39.09	12	27	7	10	0.55	0.44	0.48	no	A/T	No	1	83.26	XP_015836465.1:c.[3426+313T>A]; XP_008194877.1:c.[1553A>T]	XP_008194877.1:p.Lys518Ile	LOC657193, LOC656607, LOC656860	657193 , 656607 , 656860		657193 [Gene Symbol: LOC657193] [Locus Tag: TcasGA2_TC015684] [Chromosome: LG6] [Map Location: ] [Description: bicaudal D-related protein homolog] [Gene Type: protein-coding] || 656607 [Gene Symbol: LOC656607] [Locus Tag: TcasGA2_TC015006] [Chromosome: LG6] [Map Location: LG6|LG6] [Description: centromere-associated protein E] [Gene Type: protein-coding] || 656860 [Gene Symbol: LOC656860] [Locus …	LOC657193; TcasGA2_TC015684 || TcasGA2_TC015006; LOC656607 || LOC656860; TcasGA2_TC015681
844	NC_007421.3	5071989..5071990	MNV	AC	TG	Homozygous	20	20	100	1	12	10	0.45	37.18	22	22	12	13		1	1	no	TG/TG	No	1	200	XP_008194870.1:c.1076_1077delGTinsCA	XP_008194870.1:p.Ser359Thr	LOC103313423	103313423		103313423 [Gene Symbol: LOC103313423] [Locus Tag: TcasGA2_TC015679] [Chromosome: LG6] [Map Location: ] [Description: spindle assembly abnormal protein 6 homolog] [Gene Type: protein-coding]	LOC103313423; TcasGA2_TC015679
845	NC_007421.3	5190110	SNV	G	A	Homozygous	22	22	100	1	4	21	0.16	39.82	25	25	11	11		1	1	no	A/A	No	1	87.7	XP_008194864.1:c.914G>A	XP_008194864.1:p.Ser305Asn	LOC655209	655209		655209 [Gene Symbol: LOC655209] [Locus Tag: TcasGA2_TC015021] [Chromosome: LG6] [Map Location: ] [Description: golgin subfamily A member 4] [Gene Type: protein-coding]	LOC655209; TcasGA2_TC015021
846	NC_007421.3	5203683	SNV	G	T	Homozygous	19	20	95	1	3	16	0.16	38.63	19	20	10	12		1	1	no	T/T	No	1	50.52	XP_015836466.1:c.785C>A	XP_015836466.1:p.Pro262Gln	LOC654999	654999		654999 [Gene Symbol: LOC654999] [Locus Tag: TcasGA2_TC015670] [Chromosome: LG6] [Map Location: ] [Description: serine protease 44] [Gene Type: protein-coding]	LOC654999; H164; TcasGA2_TC015670
847	NC_007421.3	5250129	SNV	C	G	Heterozygous	12	21	57.14	1	7	6	0.46	38.42	13	22	8	9	0.14	0.37	0.76	no	C/G	No	1	68.82	XP_015836473.1:c.[1619C>G]; XP_015836472.1:c.[1910C>G]; XP_015836471.1:c.[2150C>G]	XP_015836473.1:p.[Thr540Ser]; XP_015836472.1:p.[Thr637Ser]; XP_015836471.1:p.[Thr717Ser]	LOC654936	654936		654936 [Gene Symbol: LOC654936] [Locus Tag: TcasGA2_TC015023] [Chromosome: LG6] [Map Location: ] [Description: coiled-coil domain-containing protein 136] [Gene Type: protein-coding]	TcasGA2_TC015023; LOC654936
848	NC_007421.3	5252459	SNV	G	A	Heterozygous	6	20	30	1	6	2	0.25	37.83	8	25	6	4	-1.32	0.48	0.86	no	A/G	No	1	33.66	XP_015836471.1:c.[4480G>A]; XP_015836472.1:c.[4240G>A]; XP_015836473.1:c.[3949G>A]	XP_015836471.1:p.[Glu1494Lys]; XP_015836472.1:p.[Glu1414Lys]; XP_015836473.1:p.[Glu1317Lys]	LOC654936	654936		654936 [Gene Symbol: LOC654936] [Locus Tag: TcasGA2_TC015023] [Chromosome: LG6] [Map Location: ] [Description: coiled-coil domain-containing protein 136] [Gene Type: protein-coding]	TcasGA2_TC015023; LOC654936
849	NC_007421.3	5442335	SNV	C	T	Heterozygous	5	22	22.73	0.97	5	0	0	39.4	5	27	3	3	0.74	0.03	0.4	no	C/T	No	1	15.35	XP_970735.1:c.601G>A	XP_970735.1:p.Asp201Asn	LOC659325	659325		659325 [Gene Symbol: LOC659325] [Locus Tag: TcasGA2_TC014984] [Chromosome: LG6] [Map Location: ] [Description: septin-1] [Gene Type: protein-coding]	TcasGA2_TC014984; LOC659325
[truncated: 1,371 more rows]

## Sheet: S
#	Chromosome	Region	Type	Reference	Allele	Zygosity	Count	Coverage	Frequency	Probability	Forward read count	Reverse read count	Forward/reverse balance	Average quality	Read count	Read coverage	# unique start positions	# unique end positions	BaseQRankSum	Read position test probability	Read direction test probability	Hyper-allelic	Genotype	Homopolymer	Homopolymer length	QUAL	Coding region change	Amino acid change	GCF_000002335.3_Tcas5.2_genomic_Gene	GeneID	description (GCF_000002335.3_Tcas5.2_genomic_Gene)	NCBI GENE description	NCBI GENE symbol
[truncated: 1,800 more rows]

[truncated: 5 more sheets: Tyrosine_and_Tryptophan, Enrichment_analysis, Venn, L(High-quality), S(High-quality)]
